# Supplementary material for: Expression of microRNAs and Other Small RNAs in Prefrontal Cortex in Schizophrenia, Bipolar Disorder and Depressed Subjects
Source: PLoS One. 2014 Jan 27;9(1):e86469. doi: 10.1371/journal.pone.0086469 (PMC3903529; doi:10.1371/journal.pone.0086469)
Supplement: File S2 — Deep sequencing of human miRNAs (Experiment 2∶3 male and 3 female PFC and synaptosomes prepared from a pool of the 3 males). (XLSX) [file pone.0086469.s002.xlsx]

## Sheet: Sheet1
Sequence	Sequence_Length	Aligned_to_known_miRNA	Sequence_start	Sequence_end	Strand	No.of_loci_sequence_alignedto	68F	44F	52M	35F	44M	41M	Syn	All mean	male mean	Syn normalized based on total raw counts relative to av of male samples	Syn ratio	female mean, normalized	male/female ratio	Chromosome	Gene_start	Gene_End	Gene_Strand	ACC_ID	Ensemble_ID
TGAGGTAGTAGGTTGTATAGTT	22	hsa-let-7a-1	6	27	F	3	3477864	1355883	2745093	1917963	1948107	1738929	3193005	2.19731e+06	2144043	2.93044e+06	1.36678	1.80181e+06	1.18994	9	96938239	96938318	+	MI0000060
TGAGGTAGTAGGTTGTATAGT	21	hsa-let-7a-1	6	26	F	3	619707	203619	362199	275859	289173	358554	432438	351518	336642	396879	1.17893	293336	1.14763	9	96938239	96938318	+	MI0000060
TGAGGTAGTAGGTTGTATAGTTT	23	hsa-let-7a-1	6	28	F	3	109278	40611	80925	53913	60333	42363	87993	64570.5	61207	80757.3	1.31941	54388	1.12538	9	96938239	96938318	+	MI0000060
TGAGGTAGTAGGTTGTATAG	20	hsa-let-7a-1	6	25	F	3	34827	12792	16887	15048	15315	21477	17940	19391	17893	16464.8	0.920181	16723.7	1.06992	9	96938239	96938318	+	MI0000060
TGAGGTAGTAGGTTGTAT	18	hsa-let-7a-1	6	23	F	4	17680	10156	16848	14216	10428	17504	22100	14472	14926.7	20282.7	1.35882	11222.3	1.33009	9	96938239	96938318	+	MI0000060
TGAGGTAGTAGGTTGTA	17	hsa-let-7a-1	6	22	F	4	13140	6504	9092	8452	6652	15808	12480	9941.33	10517.3	11453.8	1.08904	7497.89	1.40271	9	96938239	96938318	+	MI0000060
TGAGGTAGTAGGTTGT	16	hsa-let-7a-1	6	21	F	5	4865	2870	3345	3570	2845	6520	6030	4002.5	4236.67	5534.15	1.30625	3016.93	1.4043	9	96938239	96938318	+	MI0000060
TGAGGTAGTAGGTTGTATA	19	hsa-let-7a-1	6	24	F	3	7656	2805	3441	3420	3516	5580	3957	4403	4179	3631.62	0.869016	3704.38	1.12813	9	96938239	96938318	+	MI0000060
TGAGGTAGTAGGTTG	15	hsa-let-7a-1	6	20	F	5	1990	1080	1160	1385	1310	3710	2065	1772.5	2060	1895.2	0.919998	1188.89	1.73271	9	96938239	96938318	+	MI0000060
GAGGTAGTAGGTTGTATAGTT	21	hsa-let-7a-1	7	27	F	3	903	300	618	480	366	636	630	550.5	540	578.195	1.07073	449.137	1.20231	9	96938239	96938318	+	MI0000060
CTATACAATCTACTGTCTTTCC	22	hsa-let-7a-1	57	78	F	2	1316	362	338	470	550	526	690	593.667	471.333	633.261	1.34355	573.23	0.822242	9	96938239	96938318	+	MI0000060
CTATACAATCTACTGTCTTTC	21	hsa-let-7a-1	57	77	F	2	1256	316	276	314	434	578	524	529	429.333	480.911	1.12014	503.311	0.853019	9	96938239	96938318	+	MI0000060
TGAGGTAGTAGGTTGTATAGTTTT	24	hsa-let-7a-1	6	29	F	1	366	145	264	189	212	112	276	214.667	196	253.305	1.29237	186.807	1.04921	9	96938239	96938318	+	MI0000060
TATACAATCTACTGTCTTTCCT	22	hsa-let-7a-1	58	79	F	2	496	158	166	190	242	122	74	229	176.667	67.915	0.384424	225.235	0.784364	9	96938239	96938318	+	MI0000060
AGTAGATTGTATAGTT	16	hsa-let-7a-1	55	70	R	4	108	140	184	180	124	104	176	140	137.333	161.528	1.17617	114.219	1.20237	9	96938239	96938318	+	MI0000060
CTATACAATCTACTGTCTTT	20	hsa-let-7a-1	57	76	F	2	220	74	48	60	100	180	108	113.667	109.333	99.1192	0.906578	94.4708	1.15732	9	96938239	96938318	+	MI0000060
GAGGTAGTAGGTTGTATAGT	20	hsa-let-7a-1	7	26	F	3	132	45	120	78	78	120	141	95.5	106	129.406	1.22081	68.051	1.55766	9	96938239	96938318	+	MI0000060
AGTAGGTTGTATAGTT	16	hsa-let-7a-1	12	27	F	4	140	92	88	100	52	128	184	100	89.3333	168.87	1.89033	88.5997	1.00828	9	96938239	96938318	+	MI0000060
AGTAGATTGTATAGT	15	hsa-let-7a-1	56	70	R	4	72	44	108	76	44	60	84	67.3333	70.6667	77.0927	1.09093	51.2384	1.37917	9	96938239	96938318	+	MI0000060
TAGTAGGTTGTATAGTT	17	hsa-let-7a-1	11	27	F	3	96	60	78	60	24	96	78	69	66	71.5861	1.08464	57.6432	1.14497	9	96938239	96938318	+	MI0000060
GTAGATTGTATAGTT	15	hsa-let-7a-1	55	69	R	4	56	52	44	76	28	100	84	59.3333	57.3333	77.0927	1.34464	49.1035	1.1676	9	96938239	96938318	+	MI0000060
GGTAGTAGGTTGTATAGTT	19	hsa-let-7a-1	9	27	F	3	63	18	54	30	36	72	57	45.5	54	52.3129	0.968757	29.6222	1.82296	9	96938239	96938318	+	MI0000060
TATACAATCTACTGTCTTTCC	21	hsa-let-7a-1	58	78	F	2	110	36	28	56	30	74	26	55.6667	44	23.862	0.542319	53.9071	0.81622	9	96938239	96938318	+	MI0000060
GTAGGTTGTATAGTT	15	hsa-let-7a-1	13	27	F	4	32	56	24	28	20	72	24	38.6667	38.6667	22.0265	0.56965	30.9565	1.24906	9	96938239	96938318	+	MI0000060
AGTAGGTTGTATAGT	15	hsa-let-7a-1	12	26	F	4	36	44	40	20	20	48	68	34.6667	36	62.4084	1.73357	26.6867	1.34899	9	96938239	96938318	+	MI0000060
TATACAATCTACTGTCTTTC	20	hsa-let-7a-1	58	77	F	2	52	18	8	16	36	56	16	31	33.3333	14.6843	0.44053	22.9505	1.4524	9	96938239	96938318	+	MI0000060
CTATACAATCTACTGTCTTTCCT	23	hsa-let-7a-1	57	79	F	2	76	26	28	38	38	14	34	36.6667	26.6667	31.2042	1.17016	37.3613	0.71375	9	96938239	96938318	+	MI0000060
ATGAGGTAGTAGGTTGTATAGTT	23	hsa-let-7a-1	5	27	F	1	26	19	35	22	25	13	19	23.3333	24.3333	17.4376	0.716615	17.8801	1.36092	9	96938239	96938318	+	MI0000060
TAGTAGGTTGTATAGT	16	hsa-let-7a-1	11	26	F	3	39	24	18	27	21	27	27	26	22	24.7798	1.12635	24.018	0.91598	9	96938239	96938318	+	MI0000060
GAGGTAGTAGGTTGTATAGTTT	22	hsa-let-7a-1	7	28	F	3	33	6	21	21	21	24	24	21	22	22.0265	1.0012	16.012	1.37397	9	96938239	96938318	+	MI0000060
CTATACAATCTACTGTCTT	19	hsa-let-7a-1	57	75	F	2	56	10	10	22	10	44	54	25.3333	21.3333	49.5596	2.32311	23.4843	0.90841	9	96938239	96938318	+	MI0000060
GTAGTAGGTTGTATAGTT	18	hsa-let-7a-1	10	27	F	3	36	39	30	21	9	18	18	25.5	19	16.5199	0.869466	25.6192	0.741631	9	96938239	96938318	+	MI0000060
AGGTAGTAGGTTGTATAGTT	20	hsa-let-7a-1	8	27	F	3	39	18	27	24	6	21	36	22.5	18	33.0397	1.83554	21.6162	0.832709	9	96938239	96938318	+	MI0000060
CTATACAATCTACTGTCT	18	hsa-let-7a-1	57	74	F	2	16	4	12	8	4	30	18	12.3333	15.3333	16.5199	1.07738	7.47227	2.05203	9	96938239	96938318	+	MI0000060
GGTAGTAGGTTGTATAGT	18	hsa-let-7a-1	9	26	F	3	27	18	9	15	15	21	24	17.5	15	22.0265	1.46843	16.012	0.936797	9	96938239	96938318	+	MI0000060
ATACAATCTACTGTCTTTCCT	21	hsa-let-7a-1	59	79	F	2	34	10	14	16	16	6	12	16	12	11.0132	0.91777	16.012	0.749438	9	96938239	96938318	+	MI0000060
GAGGTAGTAGGTTGTATAG	19	hsa-let-7a-1	7	25	F	3	36	0	9	12	9	15	12	13.5	11	11.0132	1.0012	12.8096	0.858731	9	96938239	96938318	+	MI0000060
CTATACAATCTACTGT	16	hsa-let-7a-1	57	72	F	2	14	10	10	10	14	6	18	10.6667	10	16.5199	1.65199	9.07347	1.10211	9	96938239	96938318	+	MI0000060
AGTAGGTTGTATAGTTT	17	hsa-let-7a-1	12	28	F	3	12	0	9	6	6	12	12	7.5	9	11.0132	1.22369	4.8036	1.87359	9	96938239	96938318	+	MI0000060
GGTAGTAGGTTGTATAGTTT	20	hsa-let-7a-1	9	28	F	3	3	0	0	0	9	12	6	4	7	5.50662	0.78666	0.8006	8.74344	9	96938239	96938318	+	MI0000060
TATACAATCTACTGTCTTT	19	hsa-let-7a-1	58	76	F	2	8	4	2	2	2	14	8	5.33333	6	7.34216	1.22369	3.73613	1.60594	9	96938239	96938318	+	MI0000060
ATGAGGTAGTAGGTTGTATAGT	22	hsa-let-7a-1	5	26	F	1	5	3	10	8	5	2	3	5.5	5.66667	2.75331	0.485878	4.26987	1.32713	9	96938239	96938318	+	MI0000060
TTAGGGTCACACCCACCACTGGG	23	hsa-let-7a-1	28	50	F	1	6	3	9	6	4	4	11	5.33333	5.66667	10.0955	1.78155	4.003	1.4156	9	96938239	96938318	+	MI0000060
CTATACAATCTACTGTC	17	hsa-let-7a-1	57	73	F	2	4	0	0	2	0	16	2	3.66667	5.33333	1.83554	0.344164	1.6012	3.33084	9	96938239	96938318	+	MI0000060
GTAGTAGGTTGTATAGT	17	hsa-let-7a-1	10	26	F	3	30	15	6	3	0	9	3	10.5	5	2.75331	0.550662	12.8096	0.390332	9	96938239	96938318	+	MI0000060
AGGTAGTAGGTTGTATAGT	19	hsa-let-7a-1	8	26	F	3	12	6	3	3	6	6	0	6	5	0	0	5.6042	0.892188	9	96938239	96938318	+	MI0000060
TAGGTTGTATAGTTT	15	hsa-let-7a-1	14	28	F	0	0	3	12	0	3	0	0	3	5	0	0	0.8006	6.24532	9	96938239	96938318	+	MI0000060
GATAACTATACAATCTACTGT	21	hsa-let-7a-1	52	72	F	2	16	6	8	12	4	0	12	7.66667	4	11.0132	2.75331	9.07347	0.440846	9	96938239	96938318	+	MI0000060
TATACAATCTACTGT	15	hsa-let-7a-1	58	72	F	2	10	0	6	4	2	4	0	4.33333	4	0	0	3.73613	1.07063	9	96938239	96938318	+	MI0000060
AGTAGATTGTATAGTTA	17	hsa-let-7a-1	54	70	R	2	6	2	4	2	2	6	8	3.66667	4	7.34216	1.83554	2.66867	1.49888	9	96938239	96938318	+	MI0000060
ATAACTATACAATCTACTGTCT	22	hsa-let-7a-1	53	74	F	2	2	0	0	2	2	10	0	2.66667	4	0	0	1.06747	3.74719	9	96938239	96938318	+	MI0000060
ATACAATCTACTGTCTTTC	19	hsa-let-7a-1	59	77	F	2	2	0	0	0	4	8	4	2.33333	4	3.67108	0.91777	0.533733	7.49438	9	96938239	96938318	+	MI0000060
TATACAATCTACTGTCTT	18	hsa-let-7a-1	58	75	F	2	2	4	2	0	2	6	4	2.66667	3.33333	3.67108	1.10132	1.6012	2.08177	9	96938239	96938318	+	MI0000060
TAGTAGGTTGTATAGTTT	18	hsa-let-7a-1	11	28	F	3	21	3	3	6	6	0	0	6.5	3	0	0	8.006	0.374719	9	96938239	96938318	+	MI0000060
TAGTAGGTTGTATAG	15	hsa-let-7a-1	11	25	F	3	3	3	0	6	6	3	15	3.5	3	13.7665	4.58885	3.2024	0.936797	9	96938239	96938318	+	MI0000060
ATACAATCTACTGTCTTTCC	20	hsa-let-7a-1	59	78	F	2	12	4	2	0	4	2	2	4	2.66667	1.83554	0.688327	4.26987	0.624532	9	96938239	96938318	+	MI0000060
GTAGATTGTATAGTTA	16	hsa-let-7a-1	54	69	R	2	2	0	2	0	2	4	6	1.66667	2.66667	5.50662	2.06498	0.533733	4.99625	9	96938239	96938318	+	MI0000060
AGGTAGTAGGTTGTAT	16	hsa-let-7a-1	8	23	F	0	0	0	0	0	0	8	0	1.33333	2.66667	0	0	0	#DIV/0!	9	96938239	96938318	+	MI0000060
TTAGGGTCACACCCACCACTGGGA	24	hsa-let-7a-1	28	51	F	1	2	1	2	4	4	1	3	2.33333	2.33333	2.75331	1.17999	1.86807	1.24906	9	96938239	96938318	+	MI0000060
TGAGGTAGTAGGTTGTATAGTTTTAGG	27	hsa-let-7a-1	6	32	F	1	1	1	6	1	1	0	1	1.66667	2.33333	0.91777	0.39333	0.8006	2.91448	9	96938239	96938318	+	MI0000060
AGGTAGTAGGTTGTATAGTTT	21	hsa-let-7a-1	8	28	F	3	6	0	6	3	0	0	0	2.5	2	0	0	2.4018	0.832709	9	96938239	96938318	+	MI0000060
GAGGTAGTAGGTTGTATA	18	hsa-let-7a-1	7	24	F	3	3	0	0	0	0	6	3	1.5	2	2.75331	1.37665	0.8006	2.49813	9	96938239	96938318	+	MI0000060
GAGGTAGTAGGTTGT	15	hsa-let-7a-1	7	21	F	5	5	5	0	0	5	0	0	2.5	1.66667	0	0	2.66867	0.624532	9	96938239	96938318	+	MI0000060
TTAGGGTCACACCCACCACTG	21	hsa-let-7a-1	28	48	F	1	3	2	2	0	0	3	2	1.66667	1.66667	1.83554	1.10132	1.33433	1.24906	9	96938239	96938318	+	MI0000060
AGGTAGTAGGTTGTA	15	hsa-let-7a-1	8	22	F	4	8	8	0	0	0	4	0	3.33333	1.33333	0	0	4.26987	0.312266	9	96938239	96938318	+	MI0000060
GATAACTATACAATCTACTGTC	22	hsa-let-7a-1	52	73	F	2	6	0	0	6	4	0	2	2.66667	1.33333	1.83554	1.37665	3.2024	0.416354	9	96938239	96938318	+	MI0000060
GAGGTAGTAGGTTGTAT	17	hsa-let-7a-1	7	23	F	4	8	0	0	0	4	0	8	2	1.33333	7.34216	5.50662	2.13493	0.624532	9	96938239	96938318	+	MI0000060
GAGGTAGTAGGTTGTA	16	hsa-let-7a-1	7	22	F	4	4	0	4	4	0	0	8	2	1.33333	7.34216	5.50662	2.13493	0.624532	9	96938239	96938318	+	MI0000060
TATACAATCTACTGTC	16	hsa-let-7a-1	58	73	F	0	0	0	0	0	0	4	2	0.666667	1.33333	1.83554	1.37665	0	#DIV/0!	9	96938239	96938318	+	MI0000060
GTAGTAGGTTGTATAG	16	hsa-let-7a-1	10	25	F	3	3	0	3	3	0	0	0	1.5	1	0	0	1.6012	0.624532	9	96938239	96938318	+	MI0000060
GGTAGTAGGTTGTATAG	17	hsa-let-7a-1	9	25	F	3	3	0	0	0	0	3	0	1	1	0	0	0.8006	1.24906	9	96938239	96938318	+	MI0000060
GTAGGTTGTATAGTTT	16	hsa-let-7a-1	13	28	F	0	0	0	0	3	3	0	0	1	1	0	0	0.8006	1.24906	9	96938239	96938318	+	MI0000060
TTAGGGTCACACCCACCACTGG	22	hsa-let-7a-1	28	49	F	1	1	0	1	0	1	1	2	0.666667	1	1.83554	1.83554	0.266867	3.74719	9	96938239	96938318	+	MI0000060
GTAGTAGGTTGTATAGTTT	19	hsa-let-7a-1	10	28	F	0	0	0	0	0	3	0	3	0.5	1	2.75331	2.75331	0	#DIV/0!	9	96938239	96938318	+	MI0000060
AGGTAGTAGGTTGTATAG	18	hsa-let-7a-1	8	25	F	0	0	0	3	0	0	0	0	0.5	1	0	0	0	#DIV/0!	9	96938239	96938318	+	MI0000060
GTAGTAGGTTGTATA	15	hsa-let-7a-1	10	24	F	0	0	0	3	0	0	0	0	0.5	1	0	0	0	#DIV/0!	9	96938239	96938318	+	MI0000060
TAGTAGGTTGTATAGTTTTAGG	22	hsa-let-7a-1	11	32	F	1	3	1	0	2	1	1	2	1.33333	0.666667	1.83554	2.75331	1.6012	0.416354	9	96938239	96938318	+	MI0000060
TGAGGTAGTAGGTTGTATAGTTTTA	25	hsa-let-7a-1	6	30	F	1	2	0	0	1	2	0	0	0.833333	0.666667	0	0	0.8006	0.832709	9	96938239	96938318	+	MI0000060
ATAACTATACAATCTACTGTCTTT	24	hsa-let-7a-1	53	76	F	2	2	0	0	0	2	0	0	0.666667	0.666667	0	0	0.533733	1.24906	9	96938239	96938318	+	MI0000060
GATAACTATACAATCTACTGTCT	23	hsa-let-7a-1	52	74	F	2	2	0	0	0	2	0	2	0.666667	0.666667	1.83554	2.75331	0.533733	1.24906	9	96938239	96938318	+	MI0000060
AGGTAGTAGGTTGTATAGTTTT	22	hsa-let-7a-1	8	29	F	1	1	1	0	0	2	0	0	0.666667	0.666667	0	0	0.533733	1.24906	9	96938239	96938318	+	MI0000060
ATACAATCTACTGTCTTT	18	hsa-let-7a-1	59	76	F	2	2	0	0	0	0	2	0	0.666667	0.666667	0	0	0.533733	1.24906	9	96938239	96938318	+	MI0000060
TATACAATCTACTGTCT	17	hsa-let-7a-1	58	74	F	2	2	0	0	0	0	2	0	0.666667	0.666667	0	0	0.533733	1.24906	9	96938239	96938318	+	MI0000060
ATAACTATACAATCTACTGTCTT	23	hsa-let-7a-1	53	75	F	0	0	0	0	0	0	2	0	0.333333	0.666667	0	0	0	#DIV/0!	9	96938239	96938318	+	MI0000060
AACTATACAATCTACTGTCTTT	22	hsa-let-7a-1	55	76	F	0	0	0	0	0	0	2	2	0.333333	0.666667	1.83554	2.75331	0	#DIV/0!	9	96938239	96938318	+	MI0000060
TAGTAGGTTGTATAGTTTTAG	21	hsa-let-7a-1	11	31	F	0	0	0	1	0	1	0	0	0.333333	0.666667	0	0	0	#DIV/0!	9	96938239	96938318	+	MI0000060
TAACTATACAATCTACTGTC	20	hsa-let-7a-1	54	73	F	0	0	0	0	0	0	2	0	0.333333	0.666667	0	0	0	#DIV/0!	9	96938239	96938318	+	MI0000060
TTAGGGTCACACCCACCAC	19	hsa-let-7a-1	28	46	F	0	0	0	1	0	1	0	0	0.333333	0.666667	0	0	0	#DIV/0!	9	96938239	96938318	+	MI0000060
AGTAGATTGTATAGTTAT	18	hsa-let-7a-1	53	70	R	0	0	0	2	0	0	0	0	0.333333	0.666667	0	0	0	#DIV/0!	9	96938239	96938318	+	MI0000060
ATACAATCTACTGTC	15	hsa-let-7a-1	59	73	F	0	0	0	0	0	2	0	2	0.333333	0.666667	1.83554	2.75331	0	#DIV/0!	9	96938239	96938318	+	MI0000060
ATCTACTGTCTTTCC	15	hsa-let-7a-1	64	78	F	0	0	0	0	0	2	0	0	0.333333	0.666667	0	0	0	#DIV/0!	9	96938239	96938318	+	MI0000060
CTATACAATCTACTG	15	hsa-let-7a-1	57	71	F	0	0	0	0	0	0	2	0	0.333333	0.666667	0	0	0	#DIV/0!	9	96938239	96938318	+	MI0000060
ATGAGGTAGTAGGTTGTATAGTTT	24	hsa-let-7a-1	5	28	F	1	6	0	1	1	0	0	0	1.33333	0.333333	0	0	1.86807	0.178438	9	96938239	96938318	+	MI0000060
TGAGGTAGTAGGTTGTATAGTTTTAGGGTCACACC	35	hsa-let-7a-1	6	40	F	1	1	2	0	0	1	0	0	0.666667	0.333333	0	0	0.8006	0.416354	9	96938239	96938318	+	MI0000060
TGAGGTAGTAGGTTGTATAGTTTTAGGGTC	30	hsa-let-7a-1	6	35	F	1	2	0	0	0	1	0	1	0.5	0.333333	0.91777	2.75331	0.533733	0.624532	9	96938239	96938318	+	MI0000060
TGAGGTAGTAGGTTGTATAGTTTTAGGGT	29	hsa-let-7a-1	6	34	F	0	0	1	0	1	1	0	0	0.5	0.333333	0	0	0.533733	0.624532	9	96938239	96938318	+	MI0000060
TAGTAGGTTGTATAGTTTTAGGGTCACACCCACCA	35	hsa-let-7a-1	11	45	F	0	0	0	0	0	1	0	0	0.166667	0.333333	0	0	0	#DIV/0!	9	96938239	96938318	+	MI0000060
CACCACTGGGAGATAACTATACAATCTACTGTCT	34	hsa-let-7a-1	41	74	F	0	0	0	0	0	1	0	0	0.166667	0.333333	0	0	0	#DIV/0!	9	96938239	96938318	+	MI0000060
TAGTAGGTTGTATAGTTTTAGGGTCACACCCACC	34	hsa-let-7a-1	11	44	F	0	0	0	0	0	1	0	0	0.166667	0.333333	0	0	0	#DIV/0!	9	96938239	96938318	+	MI0000060
TGAGGTAGTAGGTTGTATAGTTTTAGGG	28	hsa-let-7a-1	6	33	F	0	0	0	1	0	0	0	0	0.166667	0.333333	0	0	0	#DIV/0!	9	96938239	96938318	+	MI0000060
AGATAACTATACAATCTACTGT	22	hsa-let-7a-1	51	72	F	0	0	0	0	0	0	1	0	0.166667	0.333333	0	0	0	#DIV/0!	9	96938239	96938318	+	MI0000060
TAGTAGGTTGTATAGTTTT	19	hsa-let-7a-1	11	29	F	0	0	0	0	0	0	1	2	0.166667	0.333333	1.83554	5.50662	0	#DIV/0!	9	96938239	96938318	+	MI0000060
GGTAGTAGGTTGTAT	15	hsa-let-7a-1	9	23	F	0	0	0	0	8	0	0	0	1.33333	0	0	#DIV/0!	2.13493	0	9	96938239	96938318	+	MI0000060
AACTATACAATCTACTGTCTTTC	23	hsa-let-7a-1	55	77	F	2	6	0	0	0	0	0	0	1	0	0	#DIV/0!	1.6012	0	9	96938239	96938318	+	MI0000060
TAACTATACAATCTACTGTCTTTC	24	hsa-let-7a-1	54	77	F	0	0	2	0	2	0	0	0	0.666667	0	0	#DIV/0!	1.06747	0	9	96938239	96938318	+	MI0000060
TAACTATACAATCTACTGTCTTT	23	hsa-let-7a-1	54	76	F	2	2	0	0	2	0	0	0	0.666667	0	0	#DIV/0!	1.06747	0	9	96938239	96938318	+	MI0000060
TACAATCTACTGTCTTTCCT	20	hsa-let-7a-1	60	79	F	2	2	0	0	2	0	0	2	0.666667	0	1.83554	#DIV/0!	1.06747	0	9	96938239	96938318	+	MI0000060
TACAATCTACTGTCTTTCC	19	hsa-let-7a-1	60	78	F	0	0	2	0	2	0	0	0	0.666667	0	0	#DIV/0!	1.06747	0	9	96938239	96938318	+	MI0000060
GAGGTAGTAGGTTGTATAGTTTT	23	hsa-let-7a-1	7	29	F	1	3	0	0	0	0	0	0	0.5	0	0	#DIV/0!	0.8006	0	9	96938239	96938318	+	MI0000060
AGGTAGTAGGTTGTATA	17	hsa-let-7a-1	8	24	F	0	0	3	0	0	0	0	0	0.5	0	0	#DIV/0!	0.8006	0	9	96938239	96938318	+	MI0000060
TAGATTGTATAGTTA	15	hsa-let-7a-1	54	68	R	0	0	3	0	0	0	0	0	0.5	0	0	#DIV/0!	0.8006	0	9	96938239	96938318	+	MI0000060
TGAGGTAGTAGGTTGTATAGTTTTAGGGTCAC	32	hsa-let-7a-1	6	37	F	1	1	0	0	1	0	0	0	0.333333	0	0	#DIV/0!	0.533733	0	9	96938239	96938318	+	MI0000060
ATAACTATACAATCTACTGTCTTTC	25	hsa-let-7a-1	53	77	F	0	0	0	0	2	0	0	0	0.333333	0	0	#DIV/0!	0.533733	0	9	96938239	96938318	+	MI0000060
TTAGGGTCACACCCACCACTGGGAG	25	hsa-let-7a-1	28	52	F	0	0	2	0	0	0	0	0	0.333333	0	0	#DIV/0!	0.533733	0	9	96938239	96938318	+	MI0000060
GATAACTATACAATCTACTGTCTT	24	hsa-let-7a-1	52	75	F	0	0	0	0	2	0	0	0	0.333333	0	0	#DIV/0!	0.533733	0	9	96938239	96938318	+	MI0000060
ACTATACAATCTACTGTCTTTC	22	hsa-let-7a-1	56	77	F	2	2	0	0	0	0	0	0	0.333333	0	0	#DIV/0!	0.533733	0	9	96938239	96938318	+	MI0000060
ATAACTATACAATCTACTGTC	21	hsa-let-7a-1	53	73	F	0	0	2	0	0	0	0	0	0.333333	0	0	#DIV/0!	0.533733	0	9	96938239	96938318	+	MI0000060
GATAACTATACAATCTACT	19	hsa-let-7a-1	52	70	F	2	2	0	0	0	0	0	0	0.333333	0	0	#DIV/0!	0.533733	0	9	96938239	96938318	+	MI0000060
TGGGATGAGGTAGTAGGTTGTATAGTT	27	hsa-let-7a-1	1	27	F	0	0	1	0	0	0	0	0	0.166667	0	0	#DIV/0!	0.266867	0	9	96938239	96938318	+	MI0000060
TGAGGTAGTAGGTTGTATAGTTTTAG	26	hsa-let-7a-1	6	31	F	1	1	0	0	0	0	0	0	0.166667	0	0	#DIV/0!	0.266867	0	9	96938239	96938318	+	MI0000060
TTAGGGTCACACCCACCACTGGGAGA	26	hsa-let-7a-1	28	53	F	0	0	1	0	0	0	0	0	0.166667	0	0	#DIV/0!	0.266867	0	9	96938239	96938318	+	MI0000060
GAGATAACTATACAATCTACTG	22	hsa-let-7a-1	50	71	F	0	0	1	0	0	0	0	0	0.166667	0	0	#DIV/0!	0.266867	0	9	96938239	96938318	+	MI0000060
TAGTAGGTTGTATAGTTTTA	20	hsa-let-7a-1	11	30	F	0	0	1	0	0	0	0	0	0.166667	0	0	#DIV/0!	0.266867	0	9	96938239	96938318	+	MI0000060
TTAGGGTCACACCCACCACT	20	hsa-let-7a-1	28	47	F	1	1	0	0	0	0	0	0	0.166667	0	0	#DIV/0!	0.266867	0	9	96938239	96938318	+	MI0000060
CACTGGGAGATAACTATAC	19	hsa-let-7a-1	44	62	F	0	0	1	0	0	0	0	0	0.166667	0	0	#DIV/0!	0.266867	0	9	96938239	96938318	+	MI0000060
TTAGGGTCACACCCACCACTGGGAGAT	27	hsa-let-7a-1	28	54	F	0	0	0	0	0	0	0	1	0	0	0.91777	#DIV/0!	0	#DIV/0!	9	96938239	96938318	+	MI0000060
TTTAGGGTCACACCCACCACTGGG	24	hsa-let-7a-1	27	50	F	0	0	0	0	0	0	0	1	0	0	0.91777	#DIV/0!	0	#DIV/0!	9	96938239	96938318	+	MI0000060
GATAACTATACAATCTACTG	20	hsa-let-7a-1	52	71	F	0	0	0	0	0	0	0	2	0	0	1.83554	#DIV/0!	0	#DIV/0!	9	96938239	96938318	+	MI0000060
GGTAGTAGGTTGTATA	16	hsa-let-7a-1	9	24	F	0	0	0	0	0	0	0	3	0	0	2.75331	#DIV/0!	0	#DIV/0!	9	96938239	96938318	+	MI0000060
TGAGGTAGTAGGTTGTATAGTT	22	hsa-let-7a-2	5	26	F	3	3477864	1355883	2745093	1917963	1948107	1738929	3193005	2.19731e+06	2144043	2.93044e+06	1.36678	1.80181e+06	1.18994	11	122017230	122017301	-	MI0000061
TGAGGTAGTAGGTTGTATAGT	21	hsa-let-7a-2	5	25	F	3	619707	203619	362199	275859	289173	358554	432438	351518	336642	396879	1.17893	293336	1.14763	11	122017230	122017301	-	MI0000061
TGAGGTAGTAGGTTGTATAGTTT	23	hsa-let-7a-2	5	27	F	3	109278	40611	80925	53913	60333	42363	87993	64570.5	61207	80757.3	1.31941	54388	1.12538	11	122017230	122017301	-	MI0000061
TGAGGTAGTAGGTTGTATAG	20	hsa-let-7a-2	5	24	F	3	34827	12792	16887	15048	15315	21477	17940	19391	17893	16464.8	0.920181	16723.7	1.06992	11	122017230	122017301	-	MI0000061
TGAGGTAGTAGGTTGTAT	18	hsa-let-7a-2	5	22	F	4	17680	10156	16848	14216	10428	17504	22100	14472	14926.7	20282.7	1.35882	11222.3	1.33009	11	122017230	122017301	-	MI0000061
TGAGGTAGTAGGTTGTA	17	hsa-let-7a-2	5	21	F	4	13140	6504	9092	8452	6652	15808	12480	9941.33	10517.3	11453.8	1.08904	7497.89	1.40271	11	122017230	122017301	-	MI0000061
TGAGGTAGTAGGTTGT	16	hsa-let-7a-2	5	20	F	5	4865	2870	3345	3570	2845	6520	6030	4002.5	4236.67	5534.15	1.30625	3016.93	1.4043	11	122017230	122017301	-	MI0000061
TGAGGTAGTAGGTTGTATA	19	hsa-let-7a-2	5	23	F	3	7656	2805	3441	3420	3516	5580	3957	4403	4179	3631.62	0.869016	3704.38	1.12813	11	122017230	122017301	-	MI0000061
TGAGGTAGTAGGTTG	15	hsa-let-7a-2	5	19	F	5	1990	1080	1160	1385	1310	3710	2065	1772.5	2060	1895.2	0.919998	1188.89	1.73271	11	122017230	122017301	-	MI0000061
GAGGTAGTAGGTTGTATAGTT	21	hsa-let-7a-2	6	26	F	3	903	300	618	480	366	636	630	550.5	540	578.195	1.07073	449.137	1.20231	11	122017230	122017301	-	MI0000061
GAGGTAGTAGGTTGTATAGT	20	hsa-let-7a-2	6	25	F	3	132	45	120	78	78	120	141	95.5	106	129.406	1.22081	68.051	1.55766	11	122017230	122017301	-	MI0000061
AGTAGGTTGTATAGTT	16	hsa-let-7a-2	11	26	F	4	140	92	88	100	52	128	184	100	89.3333	168.87	1.89033	88.5997	1.00828	11	122017230	122017301	-	MI0000061
TTGAGGTAGTAGGTTGTATAGTT	23	hsa-let-7a-2	4	26	F	1	171	40	62	54	91	92	102	85	81.6667	93.6125	1.14628	70.7197	1.15479	11	122017230	122017301	-	MI0000061
TGAGGTAGTAGGTTGTATAGTTTA	24	hsa-let-7a-2	5	28	F	1	181	51	89	58	71	40	83	81.6667	66.6667	76.1749	1.14262	77.3913	0.861423	11	122017230	122017301	-	MI0000061
TAGTAGGTTGTATAGTT	17	hsa-let-7a-2	10	26	F	3	96	60	78	60	24	96	78	69	66	71.5861	1.08464	57.6432	1.14497	11	122017230	122017301	-	MI0000061
GGTAGTAGGTTGTATAGTT	19	hsa-let-7a-2	8	26	F	3	63	18	54	30	36	72	57	45.5	54	52.3129	0.968757	29.6222	1.82296	11	122017230	122017301	-	MI0000061
GTAGGTTGTATAGTT	15	hsa-let-7a-2	12	26	F	4	32	56	24	28	20	72	24	38.6667	38.6667	22.0265	0.56965	30.9565	1.24906	11	122017230	122017301	-	MI0000061
TTGAGGTAGTAGGTTGTATAGT	22	hsa-let-7a-2	4	25	F	1	65	11	25	27	33	53	52	35.6667	37	47.724	1.28984	27.4873	1.34608	11	122017230	122017301	-	MI0000061
AGTAGGTTGTATAGT	15	hsa-let-7a-2	11	25	F	4	36	44	40	20	20	48	68	34.6667	36	62.4084	1.73357	26.6867	1.34899	11	122017230	122017301	-	MI0000061
TAGTAGGTTGTATAGT	16	hsa-let-7a-2	10	25	F	3	39	24	18	27	21	27	27	26	22	24.7798	1.12635	24.018	0.91598	11	122017230	122017301	-	MI0000061
GAGGTAGTAGGTTGTATAGTTT	22	hsa-let-7a-2	6	27	F	3	33	6	21	21	21	24	24	21	22	22.0265	1.0012	16.012	1.37397	11	122017230	122017301	-	MI0000061
GTAGTAGGTTGTATAGTT	18	hsa-let-7a-2	9	26	F	3	36	39	30	21	9	18	18	25.5	19	16.5199	0.869466	25.6192	0.741631	11	122017230	122017301	-	MI0000061
AGGTAGTAGGTTGTATAGTT	20	hsa-let-7a-2	7	26	F	3	39	18	27	24	6	21	36	22.5	18	33.0397	1.83554	21.6162	0.832709	11	122017230	122017301	-	MI0000061
TTGAGGTAGTAGGTTGTA	18	hsa-let-7a-2	4	21	F	2	10	12	16	8	14	22	30	13.6667	17.3333	27.5331	1.58845	8.006	2.16504	11	122017230	122017301	-	MI0000061
GGTAGTAGGTTGTATAGT	18	hsa-let-7a-2	8	25	F	3	27	18	9	15	15	21	24	17.5	15	22.0265	1.46843	16.012	0.936797	11	122017230	122017301	-	MI0000061
TTGAGGTAGTAGGTTGTAT	19	hsa-let-7a-2	4	22	F	2	8	8	14	20	16	10	18	12.6667	13.3333	16.5199	1.23899	9.6072	1.38785	11	122017230	122017301	-	MI0000061
GAGGTAGTAGGTTGTATAG	19	hsa-let-7a-2	6	24	F	3	36	0	9	12	9	15	12	13.5	11	11.0132	1.0012	12.8096	0.858731	11	122017230	122017301	-	MI0000061
AGTAGGTTGTATAGTTT	17	hsa-let-7a-2	11	27	F	3	12	0	9	6	6	12	12	7.5	9	11.0132	1.22369	4.8036	1.87359	11	122017230	122017301	-	MI0000061
CTGTACAGCCTCCTAGCTTTCC	22	hsa-let-7a-2	50	71	F	1	12	8	3	2	10	13	8	8	8.66667	7.34216	0.847172	5.87107	1.47617	11	122017230	122017301	-	MI0000061
GGTAGTAGGTTGTATAGTTT	20	hsa-let-7a-2	8	27	F	3	3	0	0	0	9	12	6	4	7	5.50662	0.78666	0.8006	8.74344	11	122017230	122017301	-	MI0000061
CTGTACAGCCTCCTAGCTTTC	21	hsa-let-7a-2	50	70	F	1	10	3	0	3	4	13	3	5.5	5.66667	2.75331	0.485878	4.26987	1.32713	11	122017230	122017301	-	MI0000061
GTAGTAGGTTGTATAGT	17	hsa-let-7a-2	9	25	F	3	30	15	6	3	0	9	3	10.5	5	2.75331	0.550662	12.8096	0.390332	11	122017230	122017301	-	MI0000061
AGGTAGTAGGTTGTATAGT	19	hsa-let-7a-2	7	25	F	3	12	6	3	3	6	6	0	6	5	0	0	5.6042	0.892188	11	122017230	122017301	-	MI0000061
TAGGTTGTATAGTTT	15	hsa-let-7a-2	13	27	F	0	0	3	12	0	3	0	0	3	5	0	0	0.8006	6.24532	11	122017230	122017301	-	MI0000061
TAGAATTACATCAAGGGAGAT	21	hsa-let-7a-2	27	47	F	1	15	5	2	2	5	7	3	6	4.66667	2.75331	0.589995	5.87107	0.794858	11	122017230	122017301	-	MI0000061
CTGTACAGCCTCCTAGCTTT	20	hsa-let-7a-2	50	69	F	1	1	2	2	0	2	7	2	2.33333	3.66667	1.83554	0.500602	0.8006	4.5799	11	122017230	122017301	-	MI0000061
TAGTAGGTTGTATAGTTT	18	hsa-let-7a-2	10	27	F	3	21	3	3	6	6	0	0	6.5	3	0	0	8.006	0.374719	11	122017230	122017301	-	MI0000061
TAGTAGGTTGTATAG	15	hsa-let-7a-2	10	24	F	3	3	3	0	6	6	3	15	3.5	3	13.7665	4.58885	3.2024	0.936797	11	122017230	122017301	-	MI0000061
TTGAGGTAGTAGGTTGTATAG	21	hsa-let-7a-2	4	24	F	1	3	0	1	0	4	3	3	1.83333	2.66667	2.75331	1.03249	0.8006	3.33084	11	122017230	122017301	-	MI0000061
AGGTAGTAGGTTGTAT	16	hsa-let-7a-2	7	22	F	0	0	0	0	0	0	8	0	1.33333	2.66667	0	0	0	#DIV/0!	11	122017230	122017301	-	MI0000061
AGGTAGTAGGTTGTATAGTTT	21	hsa-let-7a-2	7	27	F	3	6	0	6	3	0	0	0	2.5	2	0	0	2.4018	0.832709	11	122017230	122017301	-	MI0000061
TTGAGGTAGTAGGTTGT	17	hsa-let-7a-2	4	20	F	2	2	2	0	2	2	4	6	2	2	5.50662	2.75331	1.6012	1.24906	11	122017230	122017301	-	MI0000061
GAGGTAGTAGGTTGTATA	18	hsa-let-7a-2	6	23	F	3	3	0	0	0	0	6	3	1.5	2	2.75331	1.37665	0.8006	2.49813	11	122017230	122017301	-	MI0000061
GAGGTAGTAGGTTGT	15	hsa-let-7a-2	6	20	F	5	5	5	0	0	5	0	0	2.5	1.66667	0	0	2.66867	0.624532	11	122017230	122017301	-	MI0000061
TTGAGGTAGTAGGTTGTATAGTTT	24	hsa-let-7a-2	4	27	F	1	1	1	1	0	3	1	0	1.16667	1.66667	0	0	0.533733	3.12266	11	122017230	122017301	-	MI0000061
AGGTAGTAGGTTGTA	15	hsa-let-7a-2	7	21	F	4	8	8	0	0	0	4	0	3.33333	1.33333	0	0	4.26987	0.312266	11	122017230	122017301	-	MI0000061
GAGGTAGTAGGTTGTAT	17	hsa-let-7a-2	6	22	F	4	8	0	0	0	4	0	8	2	1.33333	7.34216	5.50662	2.13493	0.624532	11	122017230	122017301	-	MI0000061
GAGGTAGTAGGTTGTA	16	hsa-let-7a-2	6	21	F	4	4	0	4	4	0	0	8	2	1.33333	7.34216	5.50662	2.13493	0.624532	11	122017230	122017301	-	MI0000061
CTGTACAGCCTCCTAGCTT	19	hsa-let-7a-2	50	68	F	0	0	0	0	0	3	1	0	0.666667	1.33333	0	0	0	#DIV/0!	11	122017230	122017301	-	MI0000061
GTAGTAGGTTGTATAG	16	hsa-let-7a-2	9	24	F	3	3	0	3	3	0	0	0	1.5	1	0	0	1.6012	0.624532	11	122017230	122017301	-	MI0000061
TAACTGTACAGCCTCCTAGCT	21	hsa-let-7a-2	47	67	F	1	5	0	0	0	1	2	2	1.33333	1	1.83554	1.83554	1.33433	0.749438	11	122017230	122017301	-	MI0000061
GGTAGTAGGTTGTATAG	17	hsa-let-7a-2	8	24	F	3	3	0	0	0	0	3	0	1	1	0	0	0.8006	1.24906	11	122017230	122017301	-	MI0000061
GTAGGTTGTATAGTTT	16	hsa-let-7a-2	12	27	F	0	0	0	0	3	3	0	0	1	1	0	0	0.8006	1.24906	11	122017230	122017301	-	MI0000061
TAACTGTACAGCCTCCTAGC	20	hsa-let-7a-2	47	66	F	1	2	0	0	0	3	0	0	0.833333	1	0	0	0.533733	1.87359	11	122017230	122017301	-	MI0000061
GTAGTAGGTTGTATAGTTT	19	hsa-let-7a-2	9	27	F	0	0	0	0	0	3	0	3	0.5	1	2.75331	2.75331	0	#DIV/0!	11	122017230	122017301	-	MI0000061
AGGTAGTAGGTTGTATAG	18	hsa-let-7a-2	7	24	F	0	0	0	3	0	0	0	0	0.5	1	0	0	0	#DIV/0!	11	122017230	122017301	-	MI0000061
GTAGTAGGTTGTATA	15	hsa-let-7a-2	9	23	F	0	0	0	3	0	0	0	0	0.5	1	0	0	0	#DIV/0!	11	122017230	122017301	-	MI0000061
TTGAGGTAGTAGGTTG	16	hsa-let-7a-2	4	19	F	0	0	4	2	0	0	0	0	1	0.666667	0	0	1.06747	0.624532	11	122017230	122017301	-	MI0000061
TAGAATTACATCAAGGGAGA	20	hsa-let-7a-2	27	46	F	1	1	1	0	1	2	0	1	0.833333	0.666667	0.91777	1.37665	0.8006	0.832709	11	122017230	122017301	-	MI0000061
GTTGAGGTAGTAGGTTGTAT	20	hsa-let-7a-2	3	22	F	0	0	2	2	0	0	0	0	0.666667	0.666667	0	0	0.533733	1.24906	11	122017230	122017301	-	MI0000061
TAGAATTACATCAAGGGAGATA	22	hsa-let-7a-2	27	48	F	1	1	0	0	0	0	2	1	0.5	0.666667	0.91777	1.37665	0.266867	2.49813	11	122017230	122017301	-	MI0000061
TTGAGGTAGTAGGTTGTATA	20	hsa-let-7a-2	4	23	F	0	0	0	1	1	0	1	1	0.5	0.666667	0.91777	1.37665	0.266867	2.49813	11	122017230	122017301	-	MI0000061
ACTGTACAGCCTCCTAGCTTT	21	hsa-let-7a-2	49	69	F	0	0	0	0	0	2	0	0	0.333333	0.666667	0	0	0	#DIV/0!	11	122017230	122017301	-	MI0000061
TAACTGTACAGCCTCCTAGCTTT	23	hsa-let-7a-2	47	69	F	1	2	0	0	0	1	0	0	0.5	0.333333	0	0	0.533733	0.624532	11	122017230	122017301	-	MI0000061
CTGTACAGCCTCCTAGCTTTCCT	23	hsa-let-7a-2	50	72	F	0	0	1	1	0	0	0	1	0.333333	0.333333	0.91777	2.75331	0.266867	1.24906	11	122017230	122017301	-	MI0000061
GTTGAGGTAGTAGGTTGTATAGT	23	hsa-let-7a-2	3	25	F	0	0	1	0	0	0	1	0	0.333333	0.333333	0	0	0.266867	1.24906	11	122017230	122017301	-	MI0000061
ACTGTACAGCCTCCTAGCTTTC	22	hsa-let-7a-2	49	70	F	1	1	0	0	0	1	0	0	0.333333	0.333333	0	0	0.266867	1.24906	11	122017230	122017301	-	MI0000061
TAGTAGGTTGTATAGTTTAGAA	22	hsa-let-7a-2	10	31	F	0	0	1	0	0	1	0	0	0.333333	0.333333	0	0	0.266867	1.24906	11	122017230	122017301	-	MI0000061
TGAGGTAGTAGGTTGTATAGTTTAG	25	hsa-let-7a-2	5	29	F	0	0	0	0	0	1	0	0	0.166667	0.333333	0	0	0	#DIV/0!	11	122017230	122017301	-	MI0000061
AGATAACTGTACAGCCTCCTAGC	23	hsa-let-7a-2	44	66	F	0	0	0	0	0	0	1	0	0.166667	0.333333	0	0	0	#DIV/0!	11	122017230	122017301	-	MI0000061
TAGAATTACATCAAGGGAGATAA	23	hsa-let-7a-2	27	49	F	0	0	0	0	0	0	1	0	0.166667	0.333333	0	0	0	#DIV/0!	11	122017230	122017301	-	MI0000061
TAGAATTACATCAAGGGAG	19	hsa-let-7a-2	27	45	F	0	0	0	0	0	0	1	0	0.166667	0.333333	0	0	0	#DIV/0!	11	122017230	122017301	-	MI0000061
GGTAGTAGGTTGTAT	15	hsa-let-7a-2	8	22	F	0	0	0	0	8	0	0	0	1.33333	0	0	#DIV/0!	2.13493	0	11	122017230	122017301	-	MI0000061
TAGTAGGTTGTATAGTTTAGA	21	hsa-let-7a-2	10	30	F	1	3	0	0	0	0	0	0	0.5	0	0	#DIV/0!	0.8006	0	11	122017230	122017301	-	MI0000061
AGGTAGTAGGTTGTATA	17	hsa-let-7a-2	7	23	F	0	0	3	0	0	0	0	0	0.5	0	0	#DIV/0!	0.8006	0	11	122017230	122017301	-	MI0000061
TGTACAGCCTCCTAGCTTTCCT	22	hsa-let-7a-2	51	72	F	0	0	2	0	0	0	0	0	0.333333	0	0	#DIV/0!	0.533733	0	11	122017230	122017301	-	MI0000061
CTGTACAGCCTCCTAGCT	18	hsa-let-7a-2	50	67	F	1	2	0	0	0	0	0	0	0.333333	0	0	#DIV/0!	0.533733	0	11	122017230	122017301	-	MI0000061
TTGAGGTAGTAGGTT	15	hsa-let-7a-2	4	18	F	2	2	0	0	0	0	0	0	0.333333	0	0	#DIV/0!	0.533733	0	11	122017230	122017301	-	MI0000061
ATAACTGTACAGCCTCCTAGCTTTCC	26	hsa-let-7a-2	46	71	F	1	1	0	0	0	0	0	0	0.166667	0	0	#DIV/0!	0.266867	0	11	122017230	122017301	-	MI0000061
TAGTAGGTTGTATAGTTTAGAAT	23	hsa-let-7a-2	10	32	F	1	1	0	0	0	0	0	0	0.166667	0	0	#DIV/0!	0.266867	0	11	122017230	122017301	-	MI0000061
AACTGTACAGCCTCCTAGCTTT	22	hsa-let-7a-2	48	69	F	1	1	0	0	0	0	0	0	0.166667	0	0	#DIV/0!	0.266867	0	11	122017230	122017301	-	MI0000061
AGAATTACATCAAGGGAGAT	20	hsa-let-7a-2	28	47	F	1	1	0	0	0	0	0	0	0.166667	0	0	#DIV/0!	0.266867	0	11	122017230	122017301	-	MI0000061
TGTACAGCCTCCTAGCTTTCC	21	hsa-let-7a-2	51	71	F	0	0	0	0	0	0	0	1	0	0	0.91777	#DIV/0!	0	#DIV/0!	11	122017230	122017301	-	MI0000061
GGTAGTAGGTTGTATA	16	hsa-let-7a-2	8	23	F	0	0	0	0	0	0	0	3	0	0	2.75331	#DIV/0!	0	#DIV/0!	11	122017230	122017301	-	MI0000061
TGAGGTAGTAGGTTGTATAGTT	22	hsa-let-7a-3	4	25	F	3	3477864	1355883	2745093	1917963	1948107	1738929	3193005	2.19731e+06	2144043	2.93044e+06	1.36678	1.80181e+06	1.18994	22	46508629	46508702	+	MI0000062
TGAGGTAGTAGGTTGTATAGT	21	hsa-let-7a-3	4	24	F	3	619707	203619	362199	275859	289173	358554	432438	351518	336642	396879	1.17893	293336	1.14763	22	46508629	46508702	+	MI0000062
TGAGGTAGTAGGTTGTATAGTTT	23	hsa-let-7a-3	4	26	F	3	109278	40611	80925	53913	60333	42363	87993	64570.5	61207	80757.3	1.31941	54388	1.12538	22	46508629	46508702	+	MI0000062
TGAGGTAGTAGGTTGTATAG	20	hsa-let-7a-3	4	23	F	3	34827	12792	16887	15048	15315	21477	17940	19391	17893	16464.8	0.920181	16723.7	1.06992	22	46508629	46508702	+	MI0000062
TGAGGTAGTAGGTTGTAT	18	hsa-let-7a-3	4	21	F	4	17680	10156	16848	14216	10428	17504	22100	14472	14926.7	20282.7	1.35882	11222.3	1.33009	22	46508629	46508702	+	MI0000062
TGAGGTAGTAGGTTGTA	17	hsa-let-7a-3	4	20	F	4	13140	6504	9092	8452	6652	15808	12480	9941.33	10517.3	11453.8	1.08904	7497.89	1.40271	22	46508629	46508702	+	MI0000062
TGAGGTAGTAGGTTGT	16	hsa-let-7a-3	4	19	F	5	4865	2870	3345	3570	2845	6520	6030	4002.5	4236.67	5534.15	1.30625	3016.93	1.4043	22	46508629	46508702	+	MI0000062
TGAGGTAGTAGGTTGTATA	19	hsa-let-7a-3	4	22	F	3	7656	2805	3441	3420	3516	5580	3957	4403	4179	3631.62	0.869016	3704.38	1.12813	22	46508629	46508702	+	MI0000062
TGAGGTAGTAGGTTG	15	hsa-let-7a-3	4	18	F	5	1990	1080	1160	1385	1310	3710	2065	1772.5	2060	1895.2	0.919998	1188.89	1.73271	22	46508629	46508702	+	MI0000062
GAGGTAGTAGGTTGTATAGTT	21	hsa-let-7a-3	5	25	F	3	903	300	618	480	366	636	630	550.5	540	578.195	1.07073	449.137	1.20231	22	46508629	46508702	+	MI0000062
CTATACAATCTACTGTCTTTCC	22	hsa-let-7a-3	52	73	F	2	1316	362	338	470	550	526	690	593.667	471.333	633.261	1.34355	573.23	0.822242	22	46508629	46508702	+	MI0000062
CTATACAATCTACTGTCTTTC	21	hsa-let-7a-3	52	72	F	2	1256	316	276	314	434	578	524	529	429.333	480.911	1.12014	503.311	0.853019	22	46508629	46508702	+	MI0000062
GTGAGGTAGTAGGTTGTATAGTT	23	hsa-let-7a-3	3	25	F	1	512	237	231	220	261	425	270	314.333	305.667	247.798	0.81068	258.594	1.18203	22	46508629	46508702	+	MI0000062
GTGAGGTAGTAGGTTGTATAGT	22	hsa-let-7a-3	3	24	F	1	588	156	129	172	233	489	256	294.5	283.667	234.949	0.828258	244.45	1.16043	22	46508629	46508702	+	MI0000062
TATACAATCTACTGTCTTTCCT	22	hsa-let-7a-3	53	74	F	2	496	158	166	190	242	122	74	229	176.667	67.915	0.384424	225.235	0.784364	22	46508629	46508702	+	MI0000062
AGTAGATTGTATAGTT	16	hsa-let-7a-3	50	65	R	4	108	140	184	180	124	104	176	140	137.333	161.528	1.17617	114.219	1.20237	22	46508629	46508702	+	MI0000062
CTATACAATCTACTGTCTTT	20	hsa-let-7a-3	52	71	F	2	220	74	48	60	100	180	108	113.667	109.333	99.1192	0.906578	94.4708	1.15732	22	46508629	46508702	+	MI0000062
GAGGTAGTAGGTTGTATAGT	20	hsa-let-7a-3	5	24	F	3	132	45	120	78	78	120	141	95.5	106	129.406	1.22081	68.051	1.55766	22	46508629	46508702	+	MI0000062
AGTAGGTTGTATAGTT	16	hsa-let-7a-3	10	25	F	4	140	92	88	100	52	128	184	100	89.3333	168.87	1.89033	88.5997	1.00828	22	46508629	46508702	+	MI0000062
AGTAGATTGTATAGT	15	hsa-let-7a-3	51	65	R	4	72	44	108	76	44	60	84	67.3333	70.6667	77.0927	1.09093	51.2384	1.37917	22	46508629	46508702	+	MI0000062
TAGTAGGTTGTATAGTT	17	hsa-let-7a-3	9	25	F	3	96	60	78	60	24	96	78	69	66	71.5861	1.08464	57.6432	1.14497	22	46508629	46508702	+	MI0000062
GTAGATTGTATAGTT	15	hsa-let-7a-3	50	64	R	4	56	52	44	76	28	100	84	59.3333	57.3333	77.0927	1.34464	49.1035	1.1676	22	46508629	46508702	+	MI0000062
GGTAGTAGGTTGTATAGTT	19	hsa-let-7a-3	7	25	F	3	63	18	54	30	36	72	57	45.5	54	52.3129	0.968757	29.6222	1.82296	22	46508629	46508702	+	MI0000062
TATACAATCTACTGTCTTTCC	21	hsa-let-7a-3	53	73	F	2	110	36	28	56	30	74	26	55.6667	44	23.862	0.542319	53.9071	0.81622	22	46508629	46508702	+	MI0000062
GTAGGTTGTATAGTT	15	hsa-let-7a-3	11	25	F	4	32	56	24	28	20	72	24	38.6667	38.6667	22.0265	0.56965	30.9565	1.24906	22	46508629	46508702	+	MI0000062
AGTAGGTTGTATAGT	15	hsa-let-7a-3	10	24	F	4	36	44	40	20	20	48	68	34.6667	36	62.4084	1.73357	26.6867	1.34899	22	46508629	46508702	+	MI0000062
TATACAATCTACTGTCTTTC	20	hsa-let-7a-3	53	72	F	2	52	18	8	16	36	56	16	31	33.3333	14.6843	0.44053	22.9505	1.4524	22	46508629	46508702	+	MI0000062
CTATACAATCTACTGTCTTTCCT	23	hsa-let-7a-3	52	74	F	2	76	26	28	38	38	14	34	36.6667	26.6667	31.2042	1.17016	37.3613	0.71375	22	46508629	46508702	+	MI0000062
GTGAGGTAGTAGGTTGTATAG	21	hsa-let-7a-3	3	23	F	1	46	22	22	18	19	39	20	27.6667	26.6667	18.3554	0.688327	22.9505	1.16192	22	46508629	46508702	+	MI0000062
TAGTAGGTTGTATAGT	16	hsa-let-7a-3	9	24	F	3	39	24	18	27	21	27	27	26	22	24.7798	1.12635	24.018	0.91598	22	46508629	46508702	+	MI0000062
GAGGTAGTAGGTTGTATAGTTT	22	hsa-let-7a-3	5	26	F	3	33	6	21	21	21	24	24	21	22	22.0265	1.0012	16.012	1.37397	22	46508629	46508702	+	MI0000062
CTATACAATCTACTGTCTT	19	hsa-let-7a-3	52	70	F	2	56	10	10	22	10	44	54	25.3333	21.3333	49.5596	2.32311	23.4843	0.90841	22	46508629	46508702	+	MI0000062
GTAGTAGGTTGTATAGTT	18	hsa-let-7a-3	8	25	F	3	36	39	30	21	9	18	18	25.5	19	16.5199	0.869466	25.6192	0.741631	22	46508629	46508702	+	MI0000062
AGGTAGTAGGTTGTATAGTT	20	hsa-let-7a-3	6	25	F	3	39	18	27	24	6	21	36	22.5	18	33.0397	1.83554	21.6162	0.832709	22	46508629	46508702	+	MI0000062
CTATACAATCTACTGTCT	18	hsa-let-7a-3	52	69	F	2	16	4	12	8	4	30	18	12.3333	15.3333	16.5199	1.07738	7.47227	2.05203	22	46508629	46508702	+	MI0000062
GGTAGTAGGTTGTATAGT	18	hsa-let-7a-3	7	24	F	3	27	18	9	15	15	21	24	17.5	15	22.0265	1.46843	16.012	0.936797	22	46508629	46508702	+	MI0000062
GTGAGGTAGTAGGTTGTA	18	hsa-let-7a-3	3	20	F	1	11	2	10	3	7	22	2	9.16667	13	1.83554	0.141195	4.26987	3.04459	22	46508629	46508702	+	MI0000062
GTGAGGTAGTAGGTTGTAT	19	hsa-let-7a-3	3	21	F	1	24	7	10	5	6	22	25	12.3333	12.6667	22.9443	1.81139	9.6072	1.31846	22	46508629	46508702	+	MI0000062
ATACAATCTACTGTCTTTCCT	21	hsa-let-7a-3	54	74	F	2	34	10	14	16	16	6	12	16	12	11.0132	0.91777	16.012	0.749438	22	46508629	46508702	+	MI0000062
GAGGTAGTAGGTTGTATAG	19	hsa-let-7a-3	5	23	F	3	36	0	9	12	9	15	12	13.5	11	11.0132	1.0012	12.8096	0.858731	22	46508629	46508702	+	MI0000062
TGAGGTAGTAGGTTGTATAGTTTG	24	hsa-let-7a-3	4	27	F	1	32	9	12	15	15	3	17	14.3333	10	15.6021	1.56021	14.9445	0.669141	22	46508629	46508702	+	MI0000062
CTATACAATCTACTGT	16	hsa-let-7a-3	52	67	F	2	14	10	10	10	14	6	18	10.6667	10	16.5199	1.65199	9.07347	1.10211	22	46508629	46508702	+	MI0000062
AGTAGGTTGTATAGTTT	17	hsa-let-7a-3	10	26	F	3	12	0	9	6	6	12	12	7.5	9	11.0132	1.22369	4.8036	1.87359	22	46508629	46508702	+	MI0000062
GGTAGTAGGTTGTATAGTTT	20	hsa-let-7a-3	7	26	F	3	3	0	0	0	9	12	6	4	7	5.50662	0.78666	0.8006	8.74344	22	46508629	46508702	+	MI0000062
GTGAGGTAGTAGGTTGTATA	20	hsa-let-7a-3	3	22	F	1	14	9	2	7	3	14	3	8.16667	6.33333	2.75331	0.434733	8.006	0.791073	22	46508629	46508702	+	MI0000062
TATACAATCTACTGTCTTT	19	hsa-let-7a-3	53	71	F	2	8	4	2	2	2	14	8	5.33333	6	7.34216	1.22369	3.73613	1.60594	22	46508629	46508702	+	MI0000062
CTATACAATCTACTGTC	17	hsa-let-7a-3	52	68	F	2	4	0	0	2	0	16	2	3.66667	5.33333	1.83554	0.344164	1.6012	3.33084	22	46508629	46508702	+	MI0000062
GTAGTAGGTTGTATAGT	17	hsa-let-7a-3	8	24	F	3	30	15	6	3	0	9	3	10.5	5	2.75331	0.550662	12.8096	0.390332	22	46508629	46508702	+	MI0000062
AGGTAGTAGGTTGTATAGT	19	hsa-let-7a-3	6	24	F	3	12	6	3	3	6	6	0	6	5	0	0	5.6042	0.892188	22	46508629	46508702	+	MI0000062
GTGAGGTAGTAGGTTGTATAGTTT	24	hsa-let-7a-3	3	26	F	1	7	6	3	1	9	3	5	4.83333	5	4.58885	0.91777	3.73613	1.33828	22	46508629	46508702	+	MI0000062
TAGGTTGTATAGTTT	15	hsa-let-7a-3	12	26	F	0	0	3	12	0	3	0	0	3	5	0	0	0.8006	6.24532	22	46508629	46508702	+	MI0000062
GATAACTATACAATCTACTGT	21	hsa-let-7a-3	47	67	F	2	16	6	8	12	4	0	12	7.66667	4	11.0132	2.75331	9.07347	0.440846	22	46508629	46508702	+	MI0000062
TATACAATCTACTGT	15	hsa-let-7a-3	53	67	F	2	10	0	6	4	2	4	0	4.33333	4	0	0	3.73613	1.07063	22	46508629	46508702	+	MI0000062
AGTAGATTGTATAGTTA	17	hsa-let-7a-3	49	65	R	2	6	2	4	2	2	6	8	3.66667	4	7.34216	1.83554	2.66867	1.49888	22	46508629	46508702	+	MI0000062
ATAACTATACAATCTACTGTCT	22	hsa-let-7a-3	48	69	F	2	2	0	0	2	2	10	0	2.66667	4	0	0	1.06747	3.74719	22	46508629	46508702	+	MI0000062
ATACAATCTACTGTCTTTC	19	hsa-let-7a-3	54	72	F	2	2	0	0	0	4	8	4	2.33333	4	3.67108	0.91777	0.533733	7.49438	22	46508629	46508702	+	MI0000062
TGAGGTAGTAGGTTGTATAGTTTGG	25	hsa-let-7a-3	4	28	F	1	4	4	3	6	6	1	5	4	3.33333	4.58885	1.37665	3.73613	0.892188	22	46508629	46508702	+	MI0000062
TATACAATCTACTGTCTT	18	hsa-let-7a-3	53	70	F	2	2	4	2	0	2	6	4	2.66667	3.33333	3.67108	1.10132	1.6012	2.08177	22	46508629	46508702	+	MI0000062
TAGTAGGTTGTATAGTTT	18	hsa-let-7a-3	9	26	F	3	21	3	3	6	6	0	0	6.5	3	0	0	8.006	0.374719	22	46508629	46508702	+	MI0000062
TAGTAGGTTGTATAG	15	hsa-let-7a-3	9	23	F	3	3	3	0	6	6	3	15	3.5	3	13.7665	4.58885	3.2024	0.936797	22	46508629	46508702	+	MI0000062
ATACAATCTACTGTCTTTCC	20	hsa-let-7a-3	54	73	F	2	12	4	2	0	4	2	2	4	2.66667	1.83554	0.688327	4.26987	0.624532	22	46508629	46508702	+	MI0000062
GTAGATTGTATAGTTA	16	hsa-let-7a-3	49	64	R	2	2	0	2	0	2	4	6	1.66667	2.66667	5.50662	2.06498	0.533733	4.99625	22	46508629	46508702	+	MI0000062
AGGTAGTAGGTTGTAT	16	hsa-let-7a-3	6	21	F	0	0	0	0	0	0	8	0	1.33333	2.66667	0	0	0	#DIV/0!	22	46508629	46508702	+	MI0000062
GTGAGGTAGTAGGTTG	16	hsa-let-7a-3	3	18	F	0	0	0	0	0	0	8	0	1.33333	2.66667	0	0	0	#DIV/0!	22	46508629	46508702	+	MI0000062
TGAGGTAGTAGGTTGTATAGTTTGGGGCTCTGCCC	35	hsa-let-7a-3	4	38	F	1	14	2	1	0	5	1	1	3.83333	2.33333	0.91777	0.39333	4.26987	0.546465	22	46508629	46508702	+	MI0000062
AGGTAGTAGGTTGTATAGTTT	21	hsa-let-7a-3	6	26	F	3	6	0	6	3	0	0	0	2.5	2	0	0	2.4018	0.832709	22	46508629	46508702	+	MI0000062
GAGGTAGTAGGTTGTATA	18	hsa-let-7a-3	5	22	F	3	3	0	0	0	0	6	3	1.5	2	2.75331	1.37665	0.8006	2.49813	22	46508629	46508702	+	MI0000062
GGGTGAGGTAGTAGGTTGTATAGTT	25	hsa-let-7a-3	1	25	F	1	9	2	1	0	1	3	3	2.66667	1.66667	2.75331	1.65199	2.93553	0.567756	22	46508629	46508702	+	MI0000062
GAGGTAGTAGGTTGT	15	hsa-let-7a-3	5	19	F	5	5	5	0	0	5	0	0	2.5	1.66667	0	0	2.66867	0.624532	22	46508629	46508702	+	MI0000062
AGGTAGTAGGTTGTA	15	hsa-let-7a-3	6	20	F	4	8	8	0	0	0	4	0	3.33333	1.33333	0	0	4.26987	0.312266	22	46508629	46508702	+	MI0000062
GATAACTATACAATCTACTGTC	22	hsa-let-7a-3	47	68	F	2	6	0	0	6	4	0	2	2.66667	1.33333	1.83554	1.37665	3.2024	0.416354	22	46508629	46508702	+	MI0000062
GAGGTAGTAGGTTGTAT	17	hsa-let-7a-3	5	21	F	4	8	0	0	0	4	0	8	2	1.33333	7.34216	5.50662	2.13493	0.624532	22	46508629	46508702	+	MI0000062
GAGGTAGTAGGTTGTA	16	hsa-let-7a-3	5	20	F	4	4	0	4	4	0	0	8	2	1.33333	7.34216	5.50662	2.13493	0.624532	22	46508629	46508702	+	MI0000062
TATACAATCTACTGTC	16	hsa-let-7a-3	53	68	F	0	0	0	0	0	0	4	2	0.666667	1.33333	1.83554	1.37665	0	#DIV/0!	22	46508629	46508702	+	MI0000062
GTAGTAGGTTGTATAG	16	hsa-let-7a-3	8	23	F	3	3	0	3	3	0	0	0	1.5	1	0	0	1.6012	0.624532	22	46508629	46508702	+	MI0000062
GGTAGTAGGTTGTATAG	17	hsa-let-7a-3	7	23	F	3	3	0	0	0	0	3	0	1	1	0	0	0.8006	1.24906	22	46508629	46508702	+	MI0000062
GTAGGTTGTATAGTTT	16	hsa-let-7a-3	11	26	F	0	0	0	0	3	3	0	0	1	1	0	0	0.8006	1.24906	22	46508629	46508702	+	MI0000062
GTAGTAGGTTGTATAGTTT	19	hsa-let-7a-3	8	26	F	0	0	0	0	0	3	0	3	0.5	1	2.75331	2.75331	0	#DIV/0!	22	46508629	46508702	+	MI0000062
AGGTAGTAGGTTGTATAG	18	hsa-let-7a-3	6	23	F	0	0	0	3	0	0	0	0	0.5	1	0	0	0	#DIV/0!	22	46508629	46508702	+	MI0000062
GTAGTAGGTTGTATA	15	hsa-let-7a-3	8	22	F	0	0	0	3	0	0	0	0	0.5	1	0	0	0	#DIV/0!	22	46508629	46508702	+	MI0000062
TAGTAGGTTGTATAGTTTGGGGCTCTGCCCTGCT	34	hsa-let-7a-3	9	42	F	1	2	3	0	0	2	0	0	1.16667	0.666667	0	0	1.33433	0.499625	22	46508629	46508702	+	MI0000062
GGTGAGGTAGTAGGTTGTATAGTT	24	hsa-let-7a-3	2	25	F	1	1	1	1	0	0	1	4	0.666667	0.666667	3.67108	5.50662	0.533733	1.24906	22	46508629	46508702	+	MI0000062
ATAACTATACAATCTACTGTCTTT	24	hsa-let-7a-3	48	71	F	2	2	0	0	0	2	0	0	0.666667	0.666667	0	0	0.533733	1.24906	22	46508629	46508702	+	MI0000062
GATAACTATACAATCTACTGTCT	23	hsa-let-7a-3	47	69	F	2	2	0	0	0	2	0	2	0.666667	0.666667	1.83554	2.75331	0.533733	1.24906	22	46508629	46508702	+	MI0000062
ATACAATCTACTGTCTTT	18	hsa-let-7a-3	54	71	F	2	2	0	0	0	0	2	0	0.666667	0.666667	0	0	0.533733	1.24906	22	46508629	46508702	+	MI0000062
TATACAATCTACTGTCT	17	hsa-let-7a-3	53	69	F	2	2	0	0	0	0	2	0	0.666667	0.666667	0	0	0.533733	1.24906	22	46508629	46508702	+	MI0000062
GGGTGAGGTAGTAGGTTGTATAGT	24	hsa-let-7a-3	1	24	F	0	0	0	0	0	2	0	0	0.333333	0.666667	0	0	0	#DIV/0!	22	46508629	46508702	+	MI0000062
ATAACTATACAATCTACTGTCTT	23	hsa-let-7a-3	48	70	F	0	0	0	0	0	0	2	0	0.333333	0.666667	0	0	0	#DIV/0!	22	46508629	46508702	+	MI0000062
AACTATACAATCTACTGTCTTT	22	hsa-let-7a-3	50	71	F	0	0	0	0	0	0	2	2	0.333333	0.666667	1.83554	2.75331	0	#DIV/0!	22	46508629	46508702	+	MI0000062
TAACTATACAATCTACTGTC	20	hsa-let-7a-3	49	68	F	0	0	0	0	0	0	2	0	0.333333	0.666667	0	0	0	#DIV/0!	22	46508629	46508702	+	MI0000062
AGTAGATTGTATAGTTAT	18	hsa-let-7a-3	48	65	R	0	0	0	2	0	0	0	0	0.333333	0.666667	0	0	0	#DIV/0!	22	46508629	46508702	+	MI0000062
ATACAATCTACTGTC	15	hsa-let-7a-3	54	68	F	0	0	0	0	0	2	0	2	0.333333	0.666667	1.83554	2.75331	0	#DIV/0!	22	46508629	46508702	+	MI0000062
ATCTACTGTCTTTCC	15	hsa-let-7a-3	59	73	F	0	0	0	0	0	2	0	0	0.333333	0.666667	0	0	0	#DIV/0!	22	46508629	46508702	+	MI0000062
CTATACAATCTACTG	15	hsa-let-7a-3	52	66	F	0	0	0	0	0	0	2	0	0.333333	0.666667	0	0	0	#DIV/0!	22	46508629	46508702	+	MI0000062
TGAGGTAGTAGGTTGTATAGTTTGGGGCTCTGCC	34	hsa-let-7a-3	4	37	F	1	3	2	0	0	1	0	0	1	0.333333	0	0	1.33433	0.249813	22	46508629	46508702	+	MI0000062
TGAGGTAGTAGGTTGTATAGTTTGGG	26	hsa-let-7a-3	4	29	F	0	0	1	0	2	1	0	2	0.666667	0.333333	1.83554	5.50662	0.8006	0.416354	22	46508629	46508702	+	MI0000062
TGAGGTAGTAGGTTGTATAGTTTGGGGCT	29	hsa-let-7a-3	4	32	F	0	0	1	0	0	1	0	1	0.333333	0.333333	0.91777	2.75331	0.266867	1.24906	22	46508629	46508702	+	MI0000062
TGAGGTAGTAGGTTGTATAGTTTGGGGCTCT	31	hsa-let-7a-3	4	34	F	0	0	0	1	0	0	0	0	0.166667	0.333333	0	0	0	#DIV/0!	22	46508629	46508702	+	MI0000062
CTGCTATGGGATAACTATACA	21	hsa-let-7a-3	38	58	F	0	0	0	0	0	1	0	0	0.166667	0.333333	0	0	0	#DIV/0!	22	46508629	46508702	+	MI0000062
GGTAGTAGGTTGTAT	15	hsa-let-7a-3	7	21	F	0	0	0	0	8	0	0	0	1.33333	0	0	#DIV/0!	2.13493	0	22	46508629	46508702	+	MI0000062
AACTATACAATCTACTGTCTTTC	23	hsa-let-7a-3	50	72	F	2	6	0	0	0	0	0	0	1	0	0	#DIV/0!	1.6012	0	22	46508629	46508702	+	MI0000062
TAACTATACAATCTACTGTCTTTC	24	hsa-let-7a-3	49	72	F	0	0	2	0	2	0	0	0	0.666667	0	0	#DIV/0!	1.06747	0	22	46508629	46508702	+	MI0000062
TAACTATACAATCTACTGTCTTT	23	hsa-let-7a-3	49	71	F	2	2	0	0	2	0	0	0	0.666667	0	0	#DIV/0!	1.06747	0	22	46508629	46508702	+	MI0000062
TACAATCTACTGTCTTTCCT	20	hsa-let-7a-3	55	74	F	2	2	0	0	2	0	0	2	0.666667	0	1.83554	#DIV/0!	1.06747	0	22	46508629	46508702	+	MI0000062
TACAATCTACTGTCTTTCC	19	hsa-let-7a-3	55	73	F	0	0	2	0	2	0	0	0	0.666667	0	0	#DIV/0!	1.06747	0	22	46508629	46508702	+	MI0000062
GTGAGGTAGTAGGTTGT	17	hsa-let-7a-3	3	19	F	2	4	0	0	0	0	0	2	0.666667	0	1.83554	#DIV/0!	1.06747	0	22	46508629	46508702	+	MI0000062
AGGTAGTAGGTTGTATA	17	hsa-let-7a-3	6	22	F	0	0	3	0	0	0	0	0	0.5	0	0	#DIV/0!	0.8006	0	22	46508629	46508702	+	MI0000062
TAGATTGTATAGTTA	15	hsa-let-7a-3	49	63	R	0	0	3	0	0	0	0	0	0.5	0	0	#DIV/0!	0.8006	0	22	46508629	46508702	+	MI0000062
AGGTAGTAGGTTGTATAGTTTGGGGCTCTGCCC	33	hsa-let-7a-3	6	38	F	0	0	2	0	0	0	0	0	0.333333	0	0	#DIV/0!	0.533733	0	22	46508629	46508702	+	MI0000062
TGAGGTAGTAGGTTGTATAGTTTGGGGCTCTGC	33	hsa-let-7a-3	4	36	F	1	1	0	0	1	0	0	0	0.333333	0	0	#DIV/0!	0.533733	0	22	46508629	46508702	+	MI0000062
TGAGGTAGTAGGTTGTATAGTTTGGGGCTCTG	32	hsa-let-7a-3	4	35	F	1	1	0	0	1	0	0	0	0.333333	0	0	#DIV/0!	0.533733	0	22	46508629	46508702	+	MI0000062
TGAGGTAGTAGGTTGTATAGTTTGGGG	27	hsa-let-7a-3	4	30	F	1	1	0	0	1	0	0	0	0.333333	0	0	#DIV/0!	0.533733	0	22	46508629	46508702	+	MI0000062
ATAACTATACAATCTACTGTCTTTC	25	hsa-let-7a-3	48	72	F	0	0	0	0	2	0	0	0	0.333333	0	0	#DIV/0!	0.533733	0	22	46508629	46508702	+	MI0000062
GATAACTATACAATCTACTGTCTT	24	hsa-let-7a-3	47	70	F	0	0	0	0	2	0	0	0	0.333333	0	0	#DIV/0!	0.533733	0	22	46508629	46508702	+	MI0000062
ACTATACAATCTACTGTCTTTC	22	hsa-let-7a-3	51	72	F	2	2	0	0	0	0	0	0	0.333333	0	0	#DIV/0!	0.533733	0	22	46508629	46508702	+	MI0000062
ATAACTATACAATCTACTGTC	21	hsa-let-7a-3	48	68	F	0	0	2	0	0	0	0	0	0.333333	0	0	#DIV/0!	0.533733	0	22	46508629	46508702	+	MI0000062
GATAACTATACAATCTACT	19	hsa-let-7a-3	47	65	F	2	2	0	0	0	0	0	0	0.333333	0	0	#DIV/0!	0.533733	0	22	46508629	46508702	+	MI0000062
GGTGAGGTAGTAGGTTGTATAGTTTGGGGCTCTGC	35	hsa-let-7a-3	2	36	F	1	1	0	0	0	0	0	0	0.166667	0	0	#DIV/0!	0.266867	0	22	46508629	46508702	+	MI0000062
GGGTGAGGTAGTAGGTTGTATAGTTT	26	hsa-let-7a-3	1	26	F	1	1	0	0	0	0	0	0	0.166667	0	0	#DIV/0!	0.266867	0	22	46508629	46508702	+	MI0000062
TTTGGGGCTCTGCCCTGCTATGGG	24	hsa-let-7a-3	24	47	F	1	1	0	0	0	0	0	0	0.166667	0	0	#DIV/0!	0.266867	0	22	46508629	46508702	+	MI0000062
GGTGAGGTAGTAGGTTGTATAGT	23	hsa-let-7a-3	2	24	F	0	0	1	0	0	0	0	0	0.166667	0	0	#DIV/0!	0.266867	0	22	46508629	46508702	+	MI0000062
GTAGTAGGTTGTATAGTTTGG	21	hsa-let-7a-3	8	28	F	0	0	0	0	1	0	0	0	0.166667	0	0	#DIV/0!	0.266867	0	22	46508629	46508702	+	MI0000062
GGTAGTAGGTTGTATAGTTTGGGGCTCTG	29	hsa-let-7a-3	7	35	F	0	0	0	0	0	0	0	1	0	0	0.91777	#DIV/0!	0	#DIV/0!	22	46508629	46508702	+	MI0000062
GATAACTATACAATCTACTG	20	hsa-let-7a-3	47	66	F	0	0	0	0	0	0	0	2	0	0	1.83554	#DIV/0!	0	#DIV/0!	22	46508629	46508702	+	MI0000062
GGTAGTAGGTTGTATA	16	hsa-let-7a-3	7	22	F	0	0	0	0	0	0	0	3	0	0	2.75331	#DIV/0!	0	#DIV/0!	22	46508629	46508702	+	MI0000062
TGAGGTAGTAGGTTGTGTGGTT	22	hsa-let-7b	6	27	F	1	181129	62693	130605	92519	96639	138116	198500	116950	121787	182177	1.49587	89758.2	1.35683	22	46509566	46509648	+	MI0000063
TGAGGTAGTAGGTTGTGTGGTTT	23	hsa-let-7b	6	28	F	1	61025	18431	41898	27118	31436	32524	60005	35405.3	35286	55070.8	1.5607	28441	1.24067	22	46509566	46509648	+	MI0000063
TGAGGTAGTAGGTTGTGTGGT	21	hsa-let-7b	6	26	F	1	47813	15183	26221	20251	24242	31489	42464	27533.2	27317.3	38972.2	1.42665	22215.8	1.22963	22	46509566	46509648	+	MI0000063
TGAGGTAGTAGGTTGTGTGG	20	hsa-let-7b	6	25	F	1	14958	5402	5784	6273	6691	9471	9462	8096.5	7315.33	8683.94	1.18709	7107.46	1.02925	22	46509566	46509648	+	MI0000063
TGAGGTAGTAGGTTGT	16	hsa-let-7b	6	21	F	5	4865	2870	3345	3570	2845	6520	6030	4002.5	4236.67	5534.15	1.30625	3016.93	1.4043	22	46509566	46509648	+	MI0000063
TGAGGTAGTAGGTTG	15	hsa-let-7b	6	20	F	5	1990	1080	1160	1385	1310	3710	2065	1772.5	2060	1895.2	0.919998	1188.89	1.73271	22	46509566	46509648	+	MI0000063
TGAGGTAGTAGGTTGTG	17	hsa-let-7b	6	22	F	1	1965	838	969	1029	888	2463	1627	1358.67	1440	1493.21	1.03695	1022.63	1.40813	22	46509566	46509648	+	MI0000063
TGAGGTAGTAGGTTGTGT	18	hsa-let-7b	6	23	F	1	1508	677	835	932	816	1479	1513	1041.17	1043.33	1388.59	1.33091	831.823	1.25427	22	46509566	46509648	+	MI0000063
TGAGGTAGTAGGTTGTGTG	19	hsa-let-7b	6	24	F	1	1594	650	588	770	801	951	1144	892.333	780	1049.93	1.34606	804.336	0.969744	22	46509566	46509648	+	MI0000063
CTATACAACCTACTGCCTTCC	21	hsa-let-7b	60	80	F	1	1673	398	375	484	570	908	760	734.667	617.667	697.505	1.12926	681.844	0.905876	22	46509566	46509648	+	MI0000063
AGTAGGTTGTATAGTT	16	hsa-let-7b	58	73	R	4	140	92	88	100	52	128	184	100	89.3333	168.87	1.89033	88.5997	1.00828	22	46509566	46509648	+	MI0000063
CTATACAACCTACTGCCTTC	20	hsa-let-7b	60	79	F	1	137	40	32	38	45	86	75	63	54.3333	68.8328	1.26686	57.3763	0.946964	22	46509566	46509648	+	MI0000063
GAGGTAGTAGGTTGTGTGGTT	21	hsa-let-7b	7	27	F	1	61	23	37	25	26	87	66	43.1667	50	60.5728	1.21146	29.0885	1.71889	22	46509566	46509648	+	MI0000063
GTAGGTTGTATAGTT	15	hsa-let-7b	58	72	R	4	32	56	24	28	20	72	24	38.6667	38.6667	22.0265	0.56965	30.9565	1.24906	22	46509566	46509648	+	MI0000063
AGTAGGTTGTATAGT	15	hsa-let-7b	59	73	R	4	36	44	40	20	20	48	68	34.6667	36	62.4084	1.73357	26.6867	1.34899	22	46509566	46509648	+	MI0000063
TGAGGTAGTAGGTTGTGTGGTTTC	24	hsa-let-7b	6	29	F	1	26	11	11	15	8	19	19	15	12.6667	17.4376	1.37665	13.8771	0.912777	22	46509566	46509648	+	MI0000063
GAGGTAGTAGGTTGTGTGGTTT	22	hsa-let-7b	7	28	F	1	15	7	12	4	10	16	17	10.6667	12.6667	15.6021	1.23174	6.93853	1.82555	22	46509566	46509648	+	MI0000063
TATACAACCTACTGCCTTCC	20	hsa-let-7b	61	80	F	1	23	7	6	8	9	14	6	11.1667	9.66667	5.50662	0.56965	10.1409	0.953232	22	46509566	46509648	+	MI0000063
GAGGTAGTAGGTTGTGTGGT	20	hsa-let-7b	7	26	F	1	16	1	3	6	4	17	13	7.83333	8	11.931	1.49138	6.13793	1.30337	22	46509566	46509648	+	MI0000063
CTATACAACCTACTGCCT	18	hsa-let-7b	60	77	F	1	22	11	3	10	8	10	11	10.6667	7	10.0955	1.44221	11.4753	0.610008	22	46509566	46509648	+	MI0000063
CTATACAACCTACTGCCTT	19	hsa-let-7b	60	78	F	1	16	4	1	2	4	13	8	6.66667	6	7.34216	1.22369	5.87107	1.02196	22	46509566	46509648	+	MI0000063
GTAGGTTGTGTGGTT	15	hsa-let-7b	13	27	F	1	2	2	3	0	3	6	1	2.66667	4	0.91777	0.229442	1.06747	3.74719	22	46509566	46509648	+	MI0000063
TCAGGGCAGTGATGTTGCCCCTCGGA	26	hsa-let-7b	28	53	F	1	4	5	6	3	2	2	6	3.66667	3.33333	5.50662	1.65199	3.2024	1.04089	22	46509566	46509648	+	MI0000063
CTATACAACCTACTGCCTTCCC	22	hsa-let-7b	60	81	F	1	4	0	4	6	2	4	2	3.33333	3.33333	1.83554	0.550662	2.66867	1.24906	22	46509566	46509648	+	MI0000063
AGTAGGTTGTGTGGTT	16	hsa-let-7b	12	27	F	1	4	3	3	1	3	4	6	3	3.33333	5.50662	1.65199	2.13493	1.56133	22	46509566	46509648	+	MI0000063
TAGTAGGTTGTGTGGTT	17	hsa-let-7b	11	27	F	1	1	6	1	0	2	5	2	2.5	2.66667	1.83554	0.688327	1.86807	1.4275	22	46509566	46509648	+	MI0000063
GTGAGGTAGTAGGTTG	16	hsa-let-7b	5	20	F	0	0	0	0	0	0	8	0	1.33333	2.66667	0	0	0	#DIV/0!	22	46509566	46509648	+	MI0000063
GGTAGTAGGTTGTGTGGTT	19	hsa-let-7b	9	27	F	1	3	1	2	0	3	2	0	1.83333	2.33333	0	0	1.06747	2.18586	22	46509566	46509648	+	MI0000063
GTAGTAGGTTGTGTGGTT	18	hsa-let-7b	10	27	F	1	1	1	2	0	0	5	0	1.5	2.33333	0	0	0.533733	4.37172	22	46509566	46509648	+	MI0000063
AGTAGGTTGTATAGTTA	17	hsa-let-7b	57	73	R	1	1	1	4	0	3	0	3	1.5	2.33333	2.75331	1.17999	0.533733	4.37172	22	46509566	46509648	+	MI0000063
CTATACAACCTACTGCC	17	hsa-let-7b	60	76	F	1	2	1	1	8	3	2	1	2.83333	2	0.91777	0.458885	2.93553	0.681307	22	46509566	46509648	+	MI0000063
GAGGTAGTAGGTTGTGTGG	19	hsa-let-7b	7	25	F	1	8	0	2	2	2	1	1	2.5	1.66667	0.91777	0.550662	2.66867	0.624532	22	46509566	46509648	+	MI0000063
GAGGTAGTAGGTTGT	15	hsa-let-7b	7	21	F	5	5	5	0	0	5	0	0	2.5	1.66667	0	0	2.66867	0.624532	22	46509566	46509648	+	MI0000063
TAGTAGGTTGTGTGGT	16	hsa-let-7b	11	26	F	1	1	1	1	2	0	4	0	1.5	1.66667	0	0	1.06747	1.56133	22	46509566	46509648	+	MI0000063
GTAGTAGGTTGTGTGGT	17	hsa-let-7b	10	26	F	0	0	0	0	0	3	2	0	0.833333	1.66667	0	0	0	#DIV/0!	22	46509566	46509648	+	MI0000063
CTATACAACCTACTG	15	hsa-let-7b	60	74	F	0	0	0	0	0	1	4	0	0.833333	1.66667	0	0	0	#DIV/0!	22	46509566	46509648	+	MI0000063
TAGTAGGTTGTGTGG	15	hsa-let-7b	11	25	F	1	2	0	2	1	1	1	0	1.16667	1.33333	0	0	0.8006	1.66542	22	46509566	46509648	+	MI0000063
TCAGGGCAGTGATGTTGCC	19	hsa-let-7b	28	46	F	1	1	1	2	0	1	1	0	1	1.33333	0	0	0.533733	2.49813	22	46509566	46509648	+	MI0000063
CTATACAACCTACTGC	16	hsa-let-7b	60	75	F	0	0	2	3	0	1	0	0	1	1.33333	0	0	0.533733	2.49813	22	46509566	46509648	+	MI0000063
AGATAACTATACAACCTACTGCCT	24	hsa-let-7b	54	77	F	1	2	2	1	0	1	1	5	1.16667	1	4.58885	4.58885	1.06747	0.936797	22	46509566	46509648	+	MI0000063
TATACAACCTACTGCCTTC	19	hsa-let-7b	61	79	F	1	3	0	0	0	0	3	1	1	1	0.91777	0.91777	0.8006	1.24906	22	46509566	46509648	+	MI0000063
GTAGGTTGTGTGGTTT	16	hsa-let-7b	13	28	F	1	1	0	2	0	0	1	1	0.666667	1	0.91777	0.91777	0.266867	3.74719	22	46509566	46509648	+	MI0000063
TGAGGTAGTAGGTTGTGTGGTTTCAGGGCAGTGA	34	hsa-let-7b	6	39	F	1	4	0	0	0	2	0	0	1	0.666667	0	0	1.06747	0.624532	22	46509566	46509648	+	MI0000063
TGAGGTAGTAGGTTGTGTGGTTTCA	25	hsa-let-7b	6	30	F	1	1	2	1	1	0	1	1	1	0.666667	0.91777	1.37665	1.06747	0.624532	22	46509566	46509648	+	MI0000063
AGTAGGTTGTGTGGTTT	17	hsa-let-7b	12	28	F	1	3	1	1	0	0	1	2	1	0.666667	1.83554	2.75331	1.06747	0.624532	22	46509566	46509648	+	MI0000063
TGAGGTAGTAGGTTGTGTGGTTTCAGG	27	hsa-let-7b	6	32	F	1	2	1	0	0	2	0	0	0.833333	0.666667	0	0	0.8006	0.832709	22	46509566	46509648	+	MI0000063
TCAGGGCAGTGATGTTGCCCCTCGGAAGAT	30	hsa-let-7b	28	57	F	1	1	0	0	0	2	0	1	0.5	0.666667	0.91777	1.37665	0.266867	2.49813	22	46509566	46509648	+	MI0000063
TCAGGGCAGTGATGTTGCCCCTCGGAAG	28	hsa-let-7b	28	55	F	1	1	0	1	0	1	0	1	0.5	0.666667	0.91777	1.37665	0.266867	2.49813	22	46509566	46509648	+	MI0000063
CGGGGTGAGGTAGTAGGTTGTGTGGTT	27	hsa-let-7b	1	27	F	1	1	0	1	0	1	0	0	0.5	0.666667	0	0	0.266867	2.49813	22	46509566	46509648	+	MI0000063
AACTATACAACCTACTGCCTTC	22	hsa-let-7b	58	79	F	0	0	0	0	1	0	2	0	0.5	0.666667	0	0	0.266867	2.49813	22	46509566	46509648	+	MI0000063
ATACAACCTACTGCCTTC	18	hsa-let-7b	62	79	F	0	0	0	1	1	0	1	1	0.5	0.666667	0.91777	1.37665	0.266867	2.49813	22	46509566	46509648	+	MI0000063
GAGGTAGTAGGTTGTGTG	18	hsa-let-7b	7	24	F	0	0	1	1	0	0	1	0	0.5	0.666667	0	0	0.266867	2.49813	22	46509566	46509648	+	MI0000063
AGTAGGTTGTGTGGT	15	hsa-let-7b	12	26	F	0	0	1	0	0	1	1	0	0.5	0.666667	0	0	0.266867	2.49813	22	46509566	46509648	+	MI0000063
TAGGTTGTATAGTTA	15	hsa-let-7b	57	71	R	0	0	1	1	0	0	1	0	0.5	0.666667	0	0	0.266867	2.49813	22	46509566	46509648	+	MI0000063
GGGTGAGGTAGTAGGTTGTGTGGTT	25	hsa-let-7b	3	27	F	0	0	0	0	0	0	2	0	0.333333	0.666667	0	0	0	#DIV/0!	22	46509566	46509648	+	MI0000063
AGGTAGTAGGTTGTGTGGT	19	hsa-let-7b	8	26	F	0	0	0	0	0	1	1	1	0.333333	0.666667	0.91777	1.37665	0	#DIV/0!	22	46509566	46509648	+	MI0000063
TGAGGTAGTAGGTTGTGTGGTTTCAGGGCAGT	32	hsa-let-7b	6	37	F	1	3	0	0	0	1	0	0	0.666667	0.333333	0	0	0.8006	0.416354	22	46509566	46509648	+	MI0000063
CCCTCGGAAGATAACTATACAACCT	25	hsa-let-7b	46	70	F	1	1	2	0	0	1	0	0	0.666667	0.333333	0	0	0.8006	0.416354	22	46509566	46509648	+	MI0000063
TCGGAAGATAACTATACAACCT	22	hsa-let-7b	49	70	F	1	2	0	0	1	1	0	0	0.666667	0.333333	0	0	0.8006	0.416354	22	46509566	46509648	+	MI0000063
AGGTAGTAGGTTGTGTGGTT	20	hsa-let-7b	8	27	F	1	3	0	1	0	0	0	1	0.666667	0.333333	0.91777	2.75331	0.8006	0.416354	22	46509566	46509648	+	MI0000063
ATACAACCTACTGCCTTCC	19	hsa-let-7b	62	80	F	1	3	0	0	0	1	0	3	0.666667	0.333333	2.75331	8.25993	0.8006	0.416354	22	46509566	46509648	+	MI0000063
CCCCTCGGAAGATAACTATACAACCTACTGCCTTC	35	hsa-let-7b	45	79	F	1	2	0	0	0	1	0	0	0.5	0.333333	0	0	0.533733	0.624532	22	46509566	46509648	+	MI0000063
TGCCCCTCGGAAGATAACTATACAACCTACTGCC	34	hsa-let-7b	43	76	F	1	2	0	1	0	0	0	0	0.5	0.333333	0	0	0.533733	0.624532	22	46509566	46509648	+	MI0000063
GTGAGGTAGTAGGTTGTGTGGTT	23	hsa-let-7b	5	27	F	1	2	0	0	0	0	1	0	0.5	0.333333	0	0	0.533733	0.624532	22	46509566	46509648	+	MI0000063
CCTCGGAAGATAACTATACAACCTACTGCCTTCC	34	hsa-let-7b	47	80	F	0	0	1	0	0	1	0	0	0.333333	0.333333	0	0	0.266867	1.24906	22	46509566	46509648	+	MI0000063
TGAGGTAGTAGGTTGTGTGGTTTCAGGGC	29	hsa-let-7b	6	34	F	0	0	1	1	0	0	0	0	0.333333	0.333333	0	0	0.266867	1.24906	22	46509566	46509648	+	MI0000063
AACTATACAACCTACTGCCTTCC	23	hsa-let-7b	58	80	F	0	0	0	1	1	0	0	1	0.333333	0.333333	0.91777	2.75331	0.266867	1.24906	22	46509566	46509648	+	MI0000063
TCAGGGCAGTGATGTTGC	18	hsa-let-7b	28	45	F	0	0	1	1	0	0	0	0	0.333333	0.333333	0	0	0.266867	1.24906	22	46509566	46509648	+	MI0000063
GTAGTAGGTTGTGTGG	16	hsa-let-7b	10	25	F	1	1	0	0	0	1	0	0	0.333333	0.333333	0	0	0.266867	1.24906	22	46509566	46509648	+	MI0000063
CCCTCGGAAGATAACTATACAACCTACTGCCTTCC	35	hsa-let-7b	46	80	F	0	0	0	1	0	0	0	0	0.166667	0.333333	0	0	0	#DIV/0!	22	46509566	46509648	+	MI0000063
CCCTCGGAAGATAACTATACAACCTACTGCCTTC	34	hsa-let-7b	46	79	F	0	0	0	0	0	1	0	0	0.166667	0.333333	0	0	0	#DIV/0!	22	46509566	46509648	+	MI0000063
CCCCTCGGAAGATAACTATACAACCTACTGCCT	33	hsa-let-7b	45	77	F	0	0	0	0	0	1	0	0	0.166667	0.333333	0	0	0	#DIV/0!	22	46509566	46509648	+	MI0000063
CGGAAGATAACTATACAACCTACTGCCTTCC	31	hsa-let-7b	50	80	F	0	0	0	0	0	0	1	0	0.166667	0.333333	0	0	0	#DIV/0!	22	46509566	46509648	+	MI0000063
GAAGATAACTATACAACCTACTGCCTTC	28	hsa-let-7b	52	79	F	0	0	0	0	0	1	0	0	0.166667	0.333333	0	0	0	#DIV/0!	22	46509566	46509648	+	MI0000063
TGAGGTAGTAGGTTGTGTGGTTTCAGGG	28	hsa-let-7b	6	33	F	0	0	0	0	0	1	0	0	0.166667	0.333333	0	0	0	#DIV/0!	22	46509566	46509648	+	MI0000063
CCCCTCGGAAGATAACTATACAACCT	26	hsa-let-7b	45	70	F	0	0	0	1	0	0	0	0	0.166667	0.333333	0	0	0	#DIV/0!	22	46509566	46509648	+	MI0000063
GGGGTGAGGTAGTAGGTTGTGTGGTT	26	hsa-let-7b	2	27	F	0	0	0	0	0	0	1	0	0.166667	0.333333	0	0	0	#DIV/0!	22	46509566	46509648	+	MI0000063
GGGTGAGGTAGTAGGTTGTGTGGTTT	26	hsa-let-7b	3	28	F	0	0	0	1	0	0	0	0	0.166667	0.333333	0	0	0	#DIV/0!	22	46509566	46509648	+	MI0000063
TGCCCCTCGGAAGATAACTATACAAC	26	hsa-let-7b	43	68	F	0	0	0	0	0	0	1	0	0.166667	0.333333	0	0	0	#DIV/0!	22	46509566	46509648	+	MI0000063
GATAACTATACAACCTACTGCCTTC	25	hsa-let-7b	55	79	F	0	0	0	0	0	1	0	0	0.166667	0.333333	0	0	0	#DIV/0!	22	46509566	46509648	+	MI0000063
GATAACTATACAACCTACTGCCTT	24	hsa-let-7b	55	78	F	0	0	0	0	0	1	0	0	0.166667	0.333333	0	0	0	#DIV/0!	22	46509566	46509648	+	MI0000063
GGTGAGGTAGTAGGTTGTGTGGTT	24	hsa-let-7b	4	27	F	0	0	0	1	0	0	0	0	0.166667	0.333333	0	0	0	#DIV/0!	22	46509566	46509648	+	MI0000063
GTGAGGTAGTAGGTTGTGTGGTTT	24	hsa-let-7b	5	28	F	0	0	0	0	0	1	0	0	0.166667	0.333333	0	0	0	#DIV/0!	22	46509566	46509648	+	MI0000063
AGATAACTATACAACCTACTGCC	23	hsa-let-7b	54	76	F	0	0	0	0	0	0	1	0	0.166667	0.333333	0	0	0	#DIV/0!	22	46509566	46509648	+	MI0000063
CCCCTCGGAAGATAACTATACAA	23	hsa-let-7b	45	67	F	0	0	0	1	0	0	0	0	0.166667	0.333333	0	0	0	#DIV/0!	22	46509566	46509648	+	MI0000063
CCTCGGAAGATAACTATACAAC	22	hsa-let-7b	47	68	F	0	0	0	0	0	0	1	0	0.166667	0.333333	0	0	0	#DIV/0!	22	46509566	46509648	+	MI0000063
TGTTGCCCCTCGGAAGATAACT	22	hsa-let-7b	40	61	F	0	0	0	0	0	0	1	0	0.166667	0.333333	0	0	0	#DIV/0!	22	46509566	46509648	+	MI0000063
CCCTCGGAAGATAACTATACA	21	hsa-let-7b	46	66	F	0	0	0	0	0	0	1	0	0.166667	0.333333	0	0	0	#DIV/0!	22	46509566	46509648	+	MI0000063
CGGAAGATAACTATACAACCT	21	hsa-let-7b	50	70	F	0	0	0	1	0	0	0	0	0.166667	0.333333	0	0	0	#DIV/0!	22	46509566	46509648	+	MI0000063
CCTCGGAAGATAACTATAC	19	hsa-let-7b	47	65	F	0	0	0	0	0	0	1	0	0.166667	0.333333	0	0	0	#DIV/0!	22	46509566	46509648	+	MI0000063
TATACAACCTACTGCC	16	hsa-let-7b	61	76	F	0	0	0	1	0	0	0	0	0.166667	0.333333	0	0	0	#DIV/0!	22	46509566	46509648	+	MI0000063
ATACAACCTACTGCC	15	hsa-let-7b	62	76	F	0	0	0	1	0	0	0	0	0.166667	0.333333	0	0	0	#DIV/0!	22	46509566	46509648	+	MI0000063
GTAGTAGGTTGTGTG	15	hsa-let-7b	10	24	F	0	0	0	1	0	0	0	0	0.166667	0.333333	0	0	0	#DIV/0!	22	46509566	46509648	+	MI0000063
GTGAGGTAGTAGGTTGT	17	hsa-let-7b	5	21	F	2	4	0	0	0	0	0	2	0.666667	0	1.83554	#DIV/0!	1.06747	0	22	46509566	46509648	+	MI0000063
CTCGGAAGATAACTATACAACCTACTGCCTTCC	33	hsa-let-7b	48	80	F	1	3	0	0	0	0	0	0	0.5	0	0	#DIV/0!	0.8006	0	22	46509566	46509648	+	MI0000063
CTCGGAAGATAACTATACAACCT	23	hsa-let-7b	48	70	F	1	1	2	0	0	0	0	1	0.5	0	0.91777	#DIV/0!	0.8006	0	22	46509566	46509648	+	MI0000063
TAGTAGGTTGTGTGGTTT	18	hsa-let-7b	11	28	F	1	3	0	0	0	0	0	0	0.5	0	0	#DIV/0!	0.8006	0	22	46509566	46509648	+	MI0000063
TGAGGTAGTAGGTTGTGTGGTTTCAGGGCAG	31	hsa-let-7b	6	36	F	1	2	0	0	0	0	0	0	0.333333	0	0	#DIV/0!	0.533733	0	22	46509566	46509648	+	MI0000063
TTGCCCCTCGGAAGATAACTATACAACC	28	hsa-let-7b	42	69	F	1	2	0	0	0	0	0	0	0.333333	0	0	#DIV/0!	0.533733	0	22	46509566	46509648	+	MI0000063
AAGATAACTATACAACCTACTGCCT	25	hsa-let-7b	53	77	F	1	2	0	0	0	0	0	0	0.333333	0	0	#DIV/0!	0.533733	0	22	46509566	46509648	+	MI0000063
GGGTGAGGTAGTAGGTTGTGTGGT	24	hsa-let-7b	3	26	F	1	2	0	0	0	0	0	0	0.333333	0	0	#DIV/0!	0.533733	0	22	46509566	46509648	+	MI0000063
GGTAGTAGGTTGTGTGGT	18	hsa-let-7b	9	26	F	0	0	0	0	2	0	0	0	0.333333	0	0	#DIV/0!	0.533733	0	22	46509566	46509648	+	MI0000063
TATACAACCTACTGCCTT	18	hsa-let-7b	61	78	F	1	2	0	0	0	0	0	2	0.333333	0	1.83554	#DIV/0!	0.533733	0	22	46509566	46509648	+	MI0000063
AGGTAGTAGGTTGTG	15	hsa-let-7b	8	22	F	1	2	0	0	0	0	0	0	0.333333	0	0	#DIV/0!	0.533733	0	22	46509566	46509648	+	MI0000063
GCCCCTCGGAAGATAACTATACAACCTACTGCCT	34	hsa-let-7b	44	77	F	1	1	0	0	0	0	0	0	0.166667	0	0	#DIV/0!	0.266867	0	22	46509566	46509648	+	MI0000063
TGAGGTAGTAGGTTGTGTGGTTTCAGGGCAGTG	33	hsa-let-7b	6	38	F	1	1	0	0	0	0	0	0	0.166667	0	0	#DIV/0!	0.266867	0	22	46509566	46509648	+	MI0000063
CCCCTCGGAAGATAACTATACAACCTACTGCC	32	hsa-let-7b	45	76	F	1	1	0	0	0	0	0	0	0.166667	0	0	#DIV/0!	0.266867	0	22	46509566	46509648	+	MI0000063
CCCTCGGAAGATAACTATACAACCTACTGCCT	32	hsa-let-7b	46	77	F	0	0	0	0	1	0	0	0	0.166667	0	0	#DIV/0!	0.266867	0	22	46509566	46509648	+	MI0000063
TCGGAAGATAACTATACAACCTACTGCCTTC	31	hsa-let-7b	49	79	F	1	1	0	0	0	0	0	0	0.166667	0	0	#DIV/0!	0.266867	0	22	46509566	46509648	+	MI0000063
AGATAACTATACAACCTACTGCCTTCC	27	hsa-let-7b	54	80	F	1	1	0	0	0	0	0	0	0.166667	0	0	#DIV/0!	0.266867	0	22	46509566	46509648	+	MI0000063
AGATAACTATACAACCTACTGCCTTC	26	hsa-let-7b	54	79	F	0	0	1	0	0	0	0	0	0.166667	0	0	#DIV/0!	0.266867	0	22	46509566	46509648	+	MI0000063
CTCGGAAGATAACTATACAACCTACT	26	hsa-let-7b	48	73	F	0	0	0	0	1	0	0	0	0.166667	0	0	#DIV/0!	0.266867	0	22	46509566	46509648	+	MI0000063
ATAACTATACAACCTACTGCCTTCC	25	hsa-let-7b	56	80	F	0	0	1	0	0	0	0	0	0.166667	0	0	#DIV/0!	0.266867	0	22	46509566	46509648	+	MI0000063
GGTGAGGTAGTAGGTTGTGTGGTTT	25	hsa-let-7b	4	28	F	1	1	0	0	0	0	0	0	0.166667	0	0	#DIV/0!	0.266867	0	22	46509566	46509648	+	MI0000063
CCTCGGAAGATAACTATACAACCT	24	hsa-let-7b	47	70	F	0	0	0	0	1	0	0	0	0.166667	0	0	#DIV/0!	0.266867	0	22	46509566	46509648	+	MI0000063
TAACTATACAACCTACTGCCTTCC	24	hsa-let-7b	57	80	F	1	1	0	0	0	0	0	0	0.166667	0	0	#DIV/0!	0.266867	0	22	46509566	46509648	+	MI0000063
CTATACAACCTACTGCCTTCCCT	23	hsa-let-7b	60	82	F	0	0	0	0	1	0	0	0	0.166667	0	0	#DIV/0!	0.266867	0	22	46509566	46509648	+	MI0000063
GAAGATAACTATACAACCTACTG	23	hsa-let-7b	52	74	F	0	0	1	0	0	0	0	0	0.166667	0	0	#DIV/0!	0.266867	0	22	46509566	46509648	+	MI0000063
GGTGAGGTAGTAGGTTGTGTGGT	23	hsa-let-7b	4	26	F	1	1	0	0	0	0	0	0	0.166667	0	0	#DIV/0!	0.266867	0	22	46509566	46509648	+	MI0000063
ACTATACAACCTACTGCCTTCC	22	hsa-let-7b	59	80	F	0	0	1	0	0	0	0	0	0.166667	0	0	#DIV/0!	0.266867	0	22	46509566	46509648	+	MI0000063
CTCGGAAGATAACTATACAACC	22	hsa-let-7b	48	69	F	0	0	0	0	1	0	0	0	0.166667	0	0	#DIV/0!	0.266867	0	22	46509566	46509648	+	MI0000063
TAGTAGGTTGTGTGGTTTCAGG	22	hsa-let-7b	11	32	F	0	0	1	0	0	0	0	0	0.166667	0	0	#DIV/0!	0.266867	0	22	46509566	46509648	+	MI0000063
AGGTAGTAGGTTGTGTGGTTT	21	hsa-let-7b	8	28	F	1	1	0	0	0	0	0	0	0.166667	0	0	#DIV/0!	0.266867	0	22	46509566	46509648	+	MI0000063
GTTGCCCCTCGGAAGATAACT	21	hsa-let-7b	41	61	F	0	0	0	0	1	0	0	0	0.166667	0	0	#DIV/0!	0.266867	0	22	46509566	46509648	+	MI0000063
TGTTGCCCCTCGGAAGATAAC	21	hsa-let-7b	40	60	F	1	1	0	0	0	0	0	0	0.166667	0	0	#DIV/0!	0.266867	0	22	46509566	46509648	+	MI0000063
GGTAGTAGGTTGTGTGGTTT	20	hsa-let-7b	9	28	F	1	1	0	0	0	0	0	0	0.166667	0	0	#DIV/0!	0.266867	0	22	46509566	46509648	+	MI0000063
AGGTAGTAGGTTGTGTGG	18	hsa-let-7b	8	25	F	0	0	1	0	0	0	0	0	0.166667	0	0	#DIV/0!	0.266867	0	22	46509566	46509648	+	MI0000063
TATACAACCTACTGCCT	17	hsa-let-7b	61	77	F	0	0	1	0	0	0	0	0	0.166667	0	0	#DIV/0!	0.266867	0	22	46509566	46509648	+	MI0000063
GAGGTAGTAGGTTGTG	16	hsa-let-7b	7	22	F	0	0	0	0	1	0	0	3	0.166667	0	2.75331	#DIV/0!	0.266867	0	22	46509566	46509648	+	MI0000063
GTAGGTTGTATAGTTA	16	hsa-let-7b	57	72	R	0	0	0	0	1	0	0	0	0.166667	0	0	#DIV/0!	0.266867	0	22	46509566	46509648	+	MI0000063
GTGTGGTTTCAGGGC	15	hsa-let-7b	20	34	F	1	1	0	0	0	0	0	0	0.166667	0	0	#DIV/0!	0.266867	0	22	46509566	46509648	+	MI0000063
TAGGTTGTGTGGTTT	15	hsa-let-7b	14	28	F	0	0	0	0	1	0	0	1	0.166667	0	0.91777	#DIV/0!	0.266867	0	22	46509566	46509648	+	MI0000063
TATACAACCTACTGC	15	hsa-let-7b	61	75	F	1	1	0	0	0	0	0	0	0.166667	0	0	#DIV/0!	0.266867	0	22	46509566	46509648	+	MI0000063
TGAGGTAGTAGGTTGTGTGGTTTCAGGGCA	30	hsa-let-7b	6	35	F	0	0	0	0	0	0	0	1	0	0	0.91777	#DIV/0!	0	#DIV/0!	22	46509566	46509648	+	MI0000063
GGGGTGAGGTAGTAGGTTGTGTGGTTT	27	hsa-let-7b	2	28	F	0	0	0	0	0	0	0	1	0	0	0.91777	#DIV/0!	0	#DIV/0!	22	46509566	46509648	+	MI0000063
GCCCCTCGGAAGATAACTATACAACC	26	hsa-let-7b	44	69	F	0	0	0	0	0	0	0	1	0	0	0.91777	#DIV/0!	0	#DIV/0!	22	46509566	46509648	+	MI0000063
TCAGGGCAGTGATGTTGCCCCTCGG	25	hsa-let-7b	28	52	F	0	0	0	0	0	0	0	2	0	0	1.83554	#DIV/0!	0	#DIV/0!	22	46509566	46509648	+	MI0000063
GTGATGTTGCCCCTCGGAAGAT	22	hsa-let-7b	36	57	F	0	0	0	0	0	0	0	2	0	0	1.83554	#DIV/0!	0	#DIV/0!	22	46509566	46509648	+	MI0000063
CTCGGAAGATAACTATACAAC	21	hsa-let-7b	48	68	F	0	0	0	0	0	0	0	1	0	0	0.91777	#DIV/0!	0	#DIV/0!	22	46509566	46509648	+	MI0000063
AGTAGGTTGTATAGTTAT	18	hsa-let-7b	56	73	R	0	0	0	0	0	0	0	1	0	0	0.91777	#DIV/0!	0	#DIV/0!	22	46509566	46509648	+	MI0000063
TGAGGTAGTAGGTTGTATGGTT	22	hsa-let-7c	11	32	F	1	158490	113296	236022	142259	130771	98933	268783	146628	155242	246681	1.58901	110495	1.40497	21	17912148	17912231	+	MI0000064
TGAGGTAGTAGGTTGTATGGT	21	hsa-let-7c	11	31	F	1	21246	14925	29032	18298	16136	12195	31902	18638.7	19121	29278.7	1.53123	14536	1.31543	21	17912148	17912231	+	MI0000064
TGAGGTAGTAGGTTGTAT	18	hsa-let-7c	11	28	F	4	17680	10156	16848	14216	10428	17504	22100	14472	14926.7	20282.7	1.35882	11222.3	1.33009	21	17912148	17912231	+	MI0000064
TGAGGTAGTAGGTTGTA	17	hsa-let-7c	11	27	F	4	13140	6504	9092	8452	6652	15808	12480	9941.33	10517.3	11453.8	1.08904	7497.89	1.40271	21	17912148	17912231	+	MI0000064
TGAGGTAGTAGGTTGTATGGTTT	23	hsa-let-7c	11	33	F	1	9021	6677	15392	8255	7725	4050	15671	8520	9055.67	14382.4	1.58822	6392.26	1.41666	21	17912148	17912231	+	MI0000064
TGAGGTAGTAGGTTGT	16	hsa-let-7c	11	26	F	5	4865	2870	3345	3570	2845	6520	6030	4002.5	4236.67	5534.15	1.30625	3016.93	1.4043	21	17912148	17912231	+	MI0000064
TGAGGTAGTAGGTTG	15	hsa-let-7c	11	25	F	5	1990	1080	1160	1385	1310	3710	2065	1772.5	2060	1895.2	0.919998	1188.89	1.73271	21	17912148	17912231	+	MI0000064
TGAGGTAGTAGGTTGTATGG	20	hsa-let-7c	11	30	F	1	1671	1243	1686	1216	1082	1003	1818	1316.83	1257	1668.51	1.32737	1102.16	1.14049	21	17912148	17912231	+	MI0000064
TTGAGGTAGTAGGTTGTATGGTT	23	hsa-let-7c	10	32	F	1	744	476	1044	685	706	406	1244	676.833	718.667	1141.71	1.58864	508.381	1.41364	21	17912148	17912231	+	MI0000064
TTGAGGTAGTAGGTTGTATGGT	22	hsa-let-7c	10	31	F	1	549	383	729	540	505	384	963	515	539.333	883.813	1.63871	392.828	1.37295	21	17912148	17912231	+	MI0000064
TGAGGTAGTAGGTTGTATG	19	hsa-let-7c	11	29	F	1	346	259	321	261	222	213	398	270.333	252	365.272	1.44949	231.107	1.09041	21	17912148	17912231	+	MI0000064
TGAGGTAGTAGGTTGTATGGTTTA	24	hsa-let-7c	11	34	F	1	53	32	59	35	55	12	90	41	42	82.5993	1.96665	32.024	1.31152	21	17912148	17912231	+	MI0000064
GAGGTAGTAGGTTGTATGGTT	21	hsa-let-7c	12	32	F	1	50	32	45	31	32	44	74	39	40.3333	67.915	1.68384	30.1559	1.33749	21	17912148	17912231	+	MI0000064
CTGTACAACCTTCTAGCTTTCC	22	hsa-let-7c	56	77	F	1	47	58	43	35	38	29	79	41.6667	36.6667	72.5038	1.97738	37.3613	0.981407	21	17912148	17912231	+	MI0000064
TTGAGGTAGTAGGTTGTATGGTTT	24	hsa-let-7c	10	33	F	1	29	28	64	26	21	10	59	29.6667	31.6667	54.1484	1.70995	22.1499	1.42965	21	17912148	17912231	+	MI0000064
TTGAGGTAGTAGGTTGTATGG	21	hsa-let-7c	10	30	F	1	31	21	38	14	21	16	33	23.5	25	30.2864	1.21146	17.6132	1.41939	21	17912148	17912231	+	MI0000064
TTGAGGTAGTAGGTTGTA	18	hsa-let-7c	10	27	F	2	10	12	16	8	14	22	30	13.6667	17.3333	27.5331	1.58845	8.006	2.16504	21	17912148	17912231	+	MI0000064
GTTGAGGTAGTAGGTTGTATGGT	23	hsa-let-7c	9	31	F	1	10	13	24	9	13	8	25	12.8333	15	22.9443	1.52962	8.53973	1.7565	21	17912148	17912231	+	MI0000064
TTGAGGTAGTAGGTTGTAT	19	hsa-let-7c	10	28	F	2	8	8	14	20	16	10	18	12.6667	13.3333	16.5199	1.23899	9.6072	1.38785	21	17912148	17912231	+	MI0000064
AGTAGGTTGTATGGTT	16	hsa-let-7c	17	32	F	1	5	6	7	5	8	24	4	9.16667	13	3.67108	0.282391	4.26987	3.04459	21	17912148	17912231	+	MI0000064
GTAGGTTGTATGGTT	15	hsa-let-7c	18	32	F	1	3	2	8	1	2	24	5	6.66667	11.3333	4.58885	0.404899	1.6012	7.07802	21	17912148	17912231	+	MI0000064
GTTGAGGTAGTAGGTTGTATGGTT	24	hsa-let-7c	9	32	F	1	9	11	9	9	11	10	31	9.83333	10	28.4509	2.84509	7.73913	1.29213	21	17912148	17912231	+	MI0000064
TGTACAACCTTCTAGCTTTCCT	22	hsa-let-7c	57	78	F	1	5	6	8	6	6	8	6	6.5	7.33333	5.50662	0.750903	4.53673	1.61643	21	17912148	17912231	+	MI0000064
CTGTACAACCTTCTAGCTTTCCT	23	hsa-let-7c	56	78	F	1	12	12	5	7	12	4	16	8.66667	7	14.6843	2.09776	8.27287	0.84614	21	17912148	17912231	+	MI0000064
CTGTACAACCTTCTAGCTTTC	21	hsa-let-7c	56	76	F	1	15	8	3	3	9	7	15	7.5	6.33333	13.7665	2.17367	6.93853	0.912777	21	17912148	17912231	+	MI0000064
TAGTAGGTTGTATGGTT	17	hsa-let-7c	16	32	F	1	7	4	6	2	3	10	11	5.33333	6.33333	10.0955	1.59402	3.46927	1.82555	21	17912148	17912231	+	MI0000064
GAGGTAGTAGGTTGTATGGT	20	hsa-let-7c	12	31	F	1	10	7	6	3	6	5	5	6.16667	5.66667	4.58885	0.809797	5.33733	1.0617	21	17912148	17912231	+	MI0000064
TAGAGTTACACCCTGGGAGTT	21	hsa-let-7c	33	53	F	1	4	5	4	4	7	5	8	4.83333	5.33333	7.34216	1.37665	3.46927	1.53731	21	17912148	17912231	+	MI0000064
GGTAGTAGGTTGTATGGTT	19	hsa-let-7c	14	32	F	1	5	2	3	2	4	8	1	4	5	0.91777	0.183554	2.4018	2.08177	21	17912148	17912231	+	MI0000064
GAGGTAGTAGGTTGTATGGTTT	22	hsa-let-7c	12	33	F	1	5	1	7	3	3	1	5	3.33333	3.66667	4.58885	1.2515	2.4018	1.52663	21	17912148	17912231	+	MI0000064
TTGAGGTAGTAGGTTGTATG	20	hsa-let-7c	10	29	F	1	2	3	2	2	4	3	9	2.66667	3	8.25993	2.75331	1.86807	1.60594	21	17912148	17912231	+	MI0000064
AACTGTACAACCTTCTAGCTTTCCT	25	hsa-let-7c	54	78	F	1	4	1	2	0	5	1	1	2.16667	2.66667	0.91777	0.344164	1.33433	1.9985	21	17912148	17912231	+	MI0000064
AGGTAGTAGGTTGTAT	16	hsa-let-7c	13	28	F	0	0	0	0	0	0	8	0	1.33333	2.66667	0	0	0	#DIV/0!	21	17912148	17912231	+	MI0000064
GTAGTAGGTTGTATGGTT	18	hsa-let-7c	15	32	F	0	0	1	1	1	3	3	2	1.5	2.33333	1.83554	0.78666	0.533733	4.37172	21	17912148	17912231	+	MI0000064
TAGAGTTACACCCTGGGAGT	20	hsa-let-7c	33	52	F	1	2	1	1	4	1	4	4	2.16667	2	3.67108	1.83554	1.86807	1.07063	21	17912148	17912231	+	MI0000064
TTGAGGTAGTAGGTTGT	17	hsa-let-7c	10	26	F	2	2	2	0	2	2	4	6	2	2	5.50662	2.75331	1.6012	1.24906	21	17912148	17912231	+	MI0000064
CTGTACAACCTTCTAGCTTT	20	hsa-let-7c	56	75	F	1	5	3	0	3	3	2	2	2.66667	1.66667	1.83554	1.10132	2.93553	0.567756	21	17912148	17912231	+	MI0000064
GAGGTAGTAGGTTGT	15	hsa-let-7c	12	26	F	5	5	5	0	0	5	0	0	2.5	1.66667	0	0	2.66867	0.624532	21	17912148	17912231	+	MI0000064
AGGTAGTAGGTTGTATGGTT	20	hsa-let-7c	13	32	F	1	3	1	3	1	0	2	1	1.66667	1.66667	0.91777	0.550662	1.33433	1.24906	21	17912148	17912231	+	MI0000064
GTTGAGGTAGTAGGTTGTATGG	22	hsa-let-7c	9	30	F	1	2	1	1	1	2	2	0	1.5	1.66667	0	0	1.06747	1.56133	21	17912148	17912231	+	MI0000064
AGTAGGTTGTATGGT	15	hsa-let-7c	17	31	F	1	2	2	4	0	1	0	5	1.5	1.66667	4.58885	2.75331	1.06747	1.56133	21	17912148	17912231	+	MI0000064
AGGTAGTAGGTTGTA	15	hsa-let-7c	13	27	F	4	8	8	0	0	0	4	0	3.33333	1.33333	0	0	4.26987	0.312266	21	17912148	17912231	+	MI0000064
GAGGTAGTAGGTTGTAT	17	hsa-let-7c	12	28	F	4	8	0	0	0	4	0	8	2	1.33333	7.34216	5.50662	2.13493	0.624532	21	17912148	17912231	+	MI0000064
GAGGTAGTAGGTTGTA	16	hsa-let-7c	12	27	F	4	4	0	4	4	0	0	8	2	1.33333	7.34216	5.50662	2.13493	0.624532	21	17912148	17912231	+	MI0000064
TGAGGTAGTAGGTTGTATGGTTTAGAGTTACACC	34	hsa-let-7c	11	44	F	1	2	0	0	0	4	0	0	1	1.33333	0	0	0.533733	2.49813	21	17912148	17912231	+	MI0000064
TAGAGTTACACCCTGGGAGTTA	22	hsa-let-7c	33	54	F	1	1	1	2	1	0	1	3	1	1	2.75331	2.75331	0.8006	1.24906	21	17912148	17912231	+	MI0000064
CTGTACAACCTTCTAGCTT	19	hsa-let-7c	56	74	F	0	0	1	1	2	0	2	0	1	1	0	0	0.8006	1.24906	21	17912148	17912231	+	MI0000064
GTTGAGGTAGTAGGTTGTATGGTTT	25	hsa-let-7c	9	33	F	0	0	2	0	0	3	0	0	0.833333	1	0	0	0.533733	1.87359	21	17912148	17912231	+	MI0000064
TGAGGTAGTAGGTTGTATGGTTTAG	25	hsa-let-7c	11	35	F	0	0	0	0	0	3	0	2	0.5	1	1.83554	1.83554	0	#DIV/0!	21	17912148	17912231	+	MI0000064
GTAGGTTGTATGGTTT	16	hsa-let-7c	18	33	F	0	0	0	1	0	0	2	0	0.5	1	0	0	0	#DIV/0!	21	17912148	17912231	+	MI0000064
AACTGTACAACCTTCTAGCTTTCC	24	hsa-let-7c	54	77	F	1	2	3	0	3	2	0	2	1.66667	0.666667	1.83554	2.75331	2.13493	0.312266	21	17912148	17912231	+	MI0000064
TGGGAGTTAACTGTACAACCTTCTAGCTTTCC	32	hsa-let-7c	46	77	F	0	0	4	0	0	2	0	0	1	0.666667	0	0	1.06747	0.624532	21	17912148	17912231	+	MI0000064
TTGAGGTAGTAGGTTG	16	hsa-let-7c	10	25	F	0	0	4	2	0	0	0	0	1	0.666667	0	0	1.06747	0.624532	21	17912148	17912231	+	MI0000064
TGAGGTAGTAGGTTGTATGGTTTAGA	26	hsa-let-7c	11	36	F	1	2	0	0	0	2	0	1	0.666667	0.666667	0.91777	1.37665	0.533733	1.24906	21	17912148	17912231	+	MI0000064
GTTGAGGTAGTAGGTTGTAT	20	hsa-let-7c	9	28	F	0	0	2	2	0	0	0	0	0.666667	0.666667	0	0	0.533733	1.24906	21	17912148	17912231	+	MI0000064
TGTACAACCTTCTAGCTTTCCTT	23	hsa-let-7c	57	79	F	0	0	0	0	0	0	2	1	0.333333	0.666667	0.91777	1.37665	0	#DIV/0!	21	17912148	17912231	+	MI0000064
TGAGGTAGTAGGTTGTATGGTTTAGAGT	28	hsa-let-7c	11	38	F	1	3	0	0	1	1	0	0	0.833333	0.333333	0	0	1.06747	0.312266	21	17912148	17912231	+	MI0000064
TGTACAACCTTCTAGCTTTCC	21	hsa-let-7c	57	77	F	1	3	0	1	0	0	0	0	0.666667	0.333333	0	0	0.8006	0.416354	21	17912148	17912231	+	MI0000064
GAGGTAGTAGGTTGTATGG	19	hsa-let-7c	12	30	F	1	1	1	0	1	0	1	1	0.666667	0.333333	0.91777	2.75331	0.8006	0.416354	21	17912148	17912231	+	MI0000064
AGTAGGTTGTATGGTTT	17	hsa-let-7c	17	33	F	0	0	3	1	0	0	0	0	0.666667	0.333333	0	0	0.8006	0.416354	21	17912148	17912231	+	MI0000064
GGTAGTAGGTTGTATGGT	18	hsa-let-7c	14	31	F	1	2	0	1	0	0	0	1	0.5	0.333333	0.91777	2.75331	0.533733	0.624532	21	17912148	17912231	+	MI0000064
TAGTAGGTTGTATGGTTT	18	hsa-let-7c	16	33	F	1	1	0	1	1	0	0	0	0.5	0.333333	0	0	0.533733	0.624532	21	17912148	17912231	+	MI0000064
CTGGGAGTTAACTGTACAACCTTCTAGCTTTCC	33	hsa-let-7c	45	77	F	1	1	0	0	0	1	0	2	0.333333	0.333333	1.83554	5.50662	0.266867	1.24906	21	17912148	17912231	+	MI0000064
GGGAGTTAACTGTACAACCTTCTAGCTTTCC	31	hsa-let-7c	47	77	F	1	1	0	0	0	1	0	0	0.333333	0.333333	0	0	0.266867	1.24906	21	17912148	17912231	+	MI0000064
AGTTAACTGTACAACCTTCTAGCT	24	hsa-let-7c	50	73	F	1	1	0	1	0	0	0	0	0.333333	0.333333	0	0	0.266867	1.24906	21	17912148	17912231	+	MI0000064
AACTGTACAACCTTCTAGCTTT	22	hsa-let-7c	54	75	F	1	1	0	1	0	0	0	1	0.333333	0.333333	0.91777	2.75331	0.266867	1.24906	21	17912148	17912231	+	MI0000064
TTGAGGTAGTAGGTTGTATGGTTTAGAGTTACACC	35	hsa-let-7c	10	44	F	0	0	0	0	0	1	0	0	0.166667	0.333333	0	0	0	#DIV/0!	21	17912148	17912231	+	MI0000064
TGAGGTAGTAGGTTGTATGGTTTAGAGTTACA	32	hsa-let-7c	11	42	F	0	0	0	0	0	1	0	0	0.166667	0.333333	0	0	0	#DIV/0!	21	17912148	17912231	+	MI0000064
TGAGGTAGTAGGTTGTATGGTTTAGAGTTAC	31	hsa-let-7c	11	41	F	0	0	0	1	0	0	0	0	0.166667	0.333333	0	0	0	#DIV/0!	21	17912148	17912231	+	MI0000064
TGAGGTAGTAGGTTGTATGGTTTAGAGTT	29	hsa-let-7c	11	39	F	0	0	0	0	0	1	0	1	0.166667	0.333333	0.91777	2.75331	0	#DIV/0!	21	17912148	17912231	+	MI0000064
CGGGTTGAGGTAGTAGGTTGTATGGTT	27	hsa-let-7c	6	32	F	0	0	0	1	0	0	0	0	0.166667	0.333333	0	0	0	#DIV/0!	21	17912148	17912231	+	MI0000064
GAGTTAACTGTACAACCTTCTAGC	24	hsa-let-7c	49	72	F	0	0	0	1	0	0	0	0	0.166667	0.333333	0	0	0	#DIV/0!	21	17912148	17912231	+	MI0000064
GTTGAGGTAGTAGGTTGTATG	21	hsa-let-7c	9	29	F	0	0	0	1	0	0	0	1	0.166667	0.333333	0.91777	2.75331	0	#DIV/0!	21	17912148	17912231	+	MI0000064
GAGTTAACTGTACAACCTTCT	21	hsa-let-7c	49	69	F	0	0	0	1	0	0	0	0	0.166667	0.333333	0	0	0	#DIV/0!	21	17912148	17912231	+	MI0000064
TAACTGTACAACCTTCTAGCT	21	hsa-let-7c	53	73	F	0	0	0	1	0	0	0	0	0.166667	0.333333	0	0	0	#DIV/0!	21	17912148	17912231	+	MI0000064
GTACAACCTTCTAGCTTTCC	20	hsa-let-7c	58	77	F	0	0	0	1	0	0	0	0	0.166667	0.333333	0	0	0	#DIV/0!	21	17912148	17912231	+	MI0000064
TAGAGTTACACCCTGGGAG	19	hsa-let-7c	33	51	F	0	0	0	1	0	0	0	0	0.166667	0.333333	0	0	0	#DIV/0!	21	17912148	17912231	+	MI0000064
GTAGTAGGTTGTATGG	16	hsa-let-7c	15	30	F	0	0	0	1	0	0	0	0	0.166667	0.333333	0	0	0	#DIV/0!	21	17912148	17912231	+	MI0000064
GGTAGTAGGTTGTAT	15	hsa-let-7c	14	28	F	0	0	0	0	8	0	0	0	1.33333	0	0	#DIV/0!	2.13493	0	21	17912148	17912231	+	MI0000064
TGAGGTAGTAGGTTGTATGGTTTAGAGTTACACCC	35	hsa-let-7c	11	45	F	1	2	1	0	0	0	0	1	0.5	0	0.91777	#DIV/0!	0.8006	0	21	17912148	17912231	+	MI0000064
TAACTGTACAACCTTCTAGCTTTCC	25	hsa-let-7c	53	77	F	1	1	1	0	1	0	0	0	0.5	0	0	#DIV/0!	0.8006	0	21	17912148	17912231	+	MI0000064
CCCTGGGAGTTAACTGTACAACC	23	hsa-let-7c	43	65	F	0	0	2	0	0	0	0	0	0.333333	0	0	#DIV/0!	0.533733	0	21	17912148	17912231	+	MI0000064
TAGAGTTACACCCTGGGAGTTAA	23	hsa-let-7c	33	55	F	1	2	0	0	0	0	0	1	0.333333	0	0.91777	#DIV/0!	0.533733	0	21	17912148	17912231	+	MI0000064
TTGAGGTAGTAGGTT	15	hsa-let-7c	10	24	F	2	2	0	0	0	0	0	0	0.333333	0	0	#DIV/0!	0.533733	0	21	17912148	17912231	+	MI0000064
TTAACTGTACAACCTTCTAGCTTTCC	26	hsa-let-7c	52	77	F	1	1	0	0	0	0	0	0	0.166667	0	0	#DIV/0!	0.266867	0	21	17912148	17912231	+	MI0000064
ACTGTACAACCTTCTAGCTTTCCT	24	hsa-let-7c	55	78	F	0	0	1	0	0	0	0	0	0.166667	0	0	#DIV/0!	0.266867	0	21	17912148	17912231	+	MI0000064
TAACTGTACAACCTTCTAGCTTTC	24	hsa-let-7c	53	76	F	0	0	0	0	1	0	0	0	0.166667	0	0	#DIV/0!	0.266867	0	21	17912148	17912231	+	MI0000064
AACTGTACAACCTTCTAGCTTTC	23	hsa-let-7c	54	76	F	0	0	1	0	0	0	0	0	0.166667	0	0	#DIV/0!	0.266867	0	21	17912148	17912231	+	MI0000064
TTAACTGTACAACCTTCTAGCTT	23	hsa-let-7c	52	74	F	0	0	0	0	1	0	0	0	0.166667	0	0	#DIV/0!	0.266867	0	21	17912148	17912231	+	MI0000064
TAACTGTACAACCTTCTAGCTT	22	hsa-let-7c	53	74	F	0	0	1	0	0	0	0	0	0.166667	0	0	#DIV/0!	0.266867	0	21	17912148	17912231	+	MI0000064
AACTGTACAACCTTCTAGCTT	21	hsa-let-7c	54	74	F	1	1	0	0	0	0	0	0	0.166667	0	0	#DIV/0!	0.266867	0	21	17912148	17912231	+	MI0000064
AACTGTACAACCTTCTAGCT	20	hsa-let-7c	54	73	F	0	0	1	0	0	0	0	0	0.166667	0	0	#DIV/0!	0.266867	0	21	17912148	17912231	+	MI0000064
TGGGAGTTAACTGTACAACC	20	hsa-let-7c	46	65	F	0	0	0	0	1	0	0	0	0.166667	0	0	#DIV/0!	0.266867	0	21	17912148	17912231	+	MI0000064
AGGTAGTAGGTTGTATGGT	19	hsa-let-7c	13	31	F	0	0	0	0	1	0	0	0	0.166667	0	0	#DIV/0!	0.266867	0	21	17912148	17912231	+	MI0000064
GAGGTAGTAGGTTGTATG	18	hsa-let-7c	12	29	F	1	1	0	0	0	0	0	0	0.166667	0	0	#DIV/0!	0.266867	0	21	17912148	17912231	+	MI0000064
AGGTAGTAGGTTGTATG	17	hsa-let-7c	13	29	F	1	1	0	0	0	0	0	0	0.166667	0	0	#DIV/0!	0.266867	0	21	17912148	17912231	+	MI0000064
GGTAGTAGGTTGTATGG	17	hsa-let-7c	14	30	F	1	1	0	0	0	0	0	0	0.166667	0	0	#DIV/0!	0.266867	0	21	17912148	17912231	+	MI0000064
GGTAGTAGGTTGTATG	16	hsa-let-7c	14	29	F	0	0	0	0	1	0	0	0	0.166667	0	0	#DIV/0!	0.266867	0	21	17912148	17912231	+	MI0000064
TTAACTGTACAACCTTCTAGCTTT	24	hsa-let-7c	52	75	F	0	0	0	0	0	0	0	1	0	0	0.91777	#DIV/0!	0	#DIV/0!	21	17912148	17912231	+	MI0000064
CTGGGAGTTAACTGTACAACC	21	hsa-let-7c	45	65	F	0	0	0	0	0	0	0	1	0	0	0.91777	#DIV/0!	0	#DIV/0!	21	17912148	17912231	+	MI0000064
CTGTACAACCTTCTAGCT	18	hsa-let-7c	56	73	F	0	0	0	0	0	0	0	3	0	0	2.75331	#DIV/0!	0	#DIV/0!	21	17912148	17912231	+	MI0000064
TAGTAGGTTGTATGGT	16	hsa-let-7c	16	31	F	0	0	0	0	0	0	0	2	0	0	1.83554	#DIV/0!	0	#DIV/0!	21	17912148	17912231	+	MI0000064
AGAGGTAGTAGGTTGCATAGTT	22	hsa-let-7d	8	29	F	1	25562	13049	28343	17554	16654	14641	31757	19300.5	19879.3	29145.6	1.46613	14988.6	1.3263	9	96941116	96941202	+	MI0000065
CTATACGACCTGCTGCCTTTCT	22	hsa-let-7d	62	83	F	1	7685	4927	3605	4046	3903	3612	3999	4629.67	3706.67	3670.16	0.990152	4445.46	0.833809	9	96941116	96941202	+	MI0000065
AGAGGTAGTAGGTTGCATAGT	21	hsa-let-7d	8	28	F	1	5104	2259	3614	2889	2629	3366	4180	3310.17	3203	3836.28	1.19771	2735.92	1.17072	9	96941116	96941202	+	MI0000065
AGAGGTAGTAGGTTGCATAGTTT	23	hsa-let-7d	8	30	F	1	1129	618	1294	814	814	535	1378	867.333	881	1264.69	1.43551	683.446	1.28906	9	96941116	96941202	+	MI0000065
CTATACGACCTGCTGCCTTTC	21	hsa-let-7d	62	82	F	1	899	341	246	291	282	543	355	433.667	357	325.808	0.912628	408.573	0.873773	9	96941116	96941202	+	MI0000065
AGAGGTAGTAGGTTGCATAG	20	hsa-let-7d	8	27	F	1	548	257	324	334	288	420	346	361.833	344	317.548	0.923106	303.961	1.13172	9	96941116	96941202	+	MI0000065
TATACGACCTGCTGCCTTTCT	21	hsa-let-7d	63	83	F	1	266	263	163	190	133	136	114	191.833	144	104.626	0.726568	191.877	0.75048	9	96941116	96941202	+	MI0000065
CTATACGACCTGCTGCCTTT	20	hsa-let-7d	62	81	F	1	276	69	61	79	94	212	100	131.833	122.333	91.777	0.750221	113.151	1.08115	9	96941116	96941202	+	MI0000065
AGAGGTAGTAGGTTGCATA	19	hsa-let-7d	8	26	F	1	81	50	63	55	33	55	70	56.1667	50.3333	64.2439	1.27637	49.6372	1.01402	9	96941116	96941202	+	MI0000065
AGAGGTAGTAGGTTGCA	17	hsa-let-7d	8	24	F	1	58	39	43	33	26	82	53	46.8333	50.3333	48.6418	0.966394	34.6927	1.45083	9	96941116	96941202	+	MI0000065
CTATACGACCTGCTGCCT	18	hsa-let-7d	62	79	F	1	77	40	33	52	39	68	48	51.5	46.6667	44.053	0.943992	45.1005	1.03473	9	96941116	96941202	+	MI0000065
AGAGGTAGTAGGTTGCAT	18	hsa-let-7d	8	25	F	1	51	32	52	54	28	54	75	45.1667	44.6667	68.8328	1.54103	36.5607	1.22171	9	96941116	96941202	+	MI0000065
AGAGGTAGTAGGTTG	15	hsa-let-7d	8	22	F	1	17	5	9	17	13	35	24	16	19	22.0265	1.15929	10.4078	1.82555	9	96941116	96941202	+	MI0000065
AGAGGTAGTAGGTTGCATAGTTTT	24	hsa-let-7d	8	31	F	1	18	8	29	12	15	9	27	15.1667	17.6667	24.7798	1.40263	10.1409	1.74211	9	96941116	96941202	+	MI0000065
AAGAGGTAGTAGGTTGCATAGTT	23	hsa-let-7d	7	29	F	1	20	7	26	10	10	6	31	13.1667	14	28.4509	2.0322	9.87407	1.41786	9	96941116	96941202	+	MI0000065
CTATACGACCTGCTGCCTT	19	hsa-let-7d	62	80	F	1	19	13	8	15	8	23	12	14.3333	13	11.0132	0.847172	12.5427	1.03646	9	96941116	96941202	+	MI0000065
AGAGGTAGTAGGTTGC	16	hsa-let-7d	8	23	F	1	10	14	7	9	8	20	16	11.3333	11.6667	14.6843	1.25866	8.8066	1.32476	9	96941116	96941202	+	MI0000065
AAGAGGTAGTAGGTTGCATAGT	22	hsa-let-7d	7	28	F	1	24	12	5	8	9	17	5	12.5	10.3333	4.58885	0.444082	11.7421	0.880022	9	96941116	96941202	+	MI0000065
TATACGACCTGCTGCCTTTC	20	hsa-let-7d	63	82	F	1	17	12	8	7	8	15	10	11.1667	10.3333	9.1777	0.888165	9.6072	1.07558	9	96941116	96941202	+	MI0000065
GAGGTAGTAGGTTGCATAGTT	21	hsa-let-7d	9	29	F	1	8	6	8	9	10	12	12	8.83333	10	11.0132	1.10132	6.13793	1.62921	9	96941116	96941202	+	MI0000065
CTATACGACCTGCTGCCTTTCTT	23	hsa-let-7d	62	84	F	1	9	2	4	6	2	7	2	5	4.33333	1.83554	0.423586	4.53673	0.955166	9	96941116	96941202	+	MI0000065
TATACGACCTGCTGCCTTT	19	hsa-let-7d	63	81	F	1	9	0	1	6	3	6	0	4.16667	3.33333	0	0	4.003	0.832709	9	96941116	96941202	+	MI0000065
CTATACGACCTGCTGCC	17	hsa-let-7d	62	78	F	1	6	2	0	6	4	3	5	3.5	2.33333	4.58885	1.96665	3.73613	0.624532	9	96941116	96941202	+	MI0000065
AAGAGGTAGTAGGTTGCATAG	21	hsa-let-7d	7	27	F	1	3	0	2	0	3	1	1	1.5	2	0.91777	0.458885	0.8006	2.49813	9	96941116	96941202	+	MI0000065
GAGGTAGTAGGTTGCATAGT	20	hsa-let-7d	9	28	F	1	2	1	1	2	1	3	1	1.66667	1.66667	0.91777	0.550662	1.33433	1.24906	9	96941116	96941202	+	MI0000065
TATACGACCTGCTGCCT	17	hsa-let-7d	63	79	F	1	4	0	2	1	0	3	0	1.66667	1.66667	0	0	1.33433	1.24906	9	96941116	96941202	+	MI0000065
ATACGACCTGCTGCCTTTCT	20	hsa-let-7d	64	83	F	1	7	5	0	4	0	4	4	3.33333	1.33333	3.67108	2.75331	4.26987	0.312266	9	96941116	96941202	+	MI0000065
TAACTATACGACCTGCTGCCT	21	hsa-let-7d	59	79	F	1	7	0	0	1	2	2	1	2	1.33333	0.91777	0.688327	2.13493	0.624532	9	96941116	96941202	+	MI0000065
AGGTAGTAGGTTGCATAGTT	20	hsa-let-7d	10	29	F	1	3	2	3	3	1	0	2	2	1.33333	1.83554	1.37665	2.13493	0.624532	9	96941116	96941202	+	MI0000065
TAGTAGGTTGCATAGTT	17	hsa-let-7d	13	29	F	0	0	0	1	1	0	3	1	0.833333	1.33333	0.91777	0.688327	0.266867	4.99625	9	96941116	96941202	+	MI0000065
CTATACGACCTGCTGC	16	hsa-let-7d	62	77	F	1	1	1	1	2	0	2	4	1.16667	1	3.67108	3.67108	1.06747	0.936797	9	96941116	96941202	+	MI0000065
TATACGACCTGCTGCCTT	18	hsa-let-7d	63	80	F	1	1	0	0	0	0	3	0	0.666667	1	0	0	0.266867	3.74719	9	96941116	96941202	+	MI0000065
TATACGACCTGCTGCCTTTCTT	22	hsa-let-7d	63	84	F	1	2	3	2	3	0	0	0	1.66667	0.666667	0	0	2.13493	0.312266	9	96941116	96941202	+	MI0000065
CTATACGACCTGCTG	15	hsa-let-7d	62	76	F	1	2	3	1	2	0	1	0	1.5	0.666667	0	0	1.86807	0.356875	9	96941116	96941202	+	MI0000065
TAACTATACGACCTGCTGCCTTTC	24	hsa-let-7d	59	82	F	1	1	0	1	0	1	0	0	0.5	0.666667	0	0	0.266867	2.49813	9	96941116	96941202	+	MI0000065
GAGGTAGTAGGTTGCATAGTTT	22	hsa-let-7d	9	30	F	1	1	0	0	0	0	2	1	0.5	0.666667	0.91777	1.37665	0.266867	2.49813	9	96941116	96941202	+	MI0000065
GGTAGTAGGTTGCATAGTT	19	hsa-let-7d	11	29	F	0	0	1	0	0	1	1	1	0.5	0.666667	0.91777	1.37665	0.266867	2.49813	9	96941116	96941202	+	MI0000065
AAGAGGTAGTAGGTTGCATAGTTT	24	hsa-let-7d	7	30	F	0	0	0	0	0	2	0	2	0.333333	0.666667	1.83554	2.75331	0	#DIV/0!	9	96941116	96941202	+	MI0000065
GTAGTAGGTTGCATAGT	17	hsa-let-7d	12	28	F	0	0	0	1	0	1	0	0	0.333333	0.666667	0	0	0	#DIV/0!	9	96941116	96941202	+	MI0000065
GAGGTAGTAGGTTGCA	16	hsa-let-7d	9	24	F	0	0	0	0	0	0	2	0	0.333333	0.666667	0	0	0	#DIV/0!	9	96941116	96941202	+	MI0000065
AGTAGGTTGCATAGT	15	hsa-let-7d	14	28	F	0	0	0	0	0	2	0	0	0.333333	0.666667	0	0	0	#DIV/0!	9	96941116	96941202	+	MI0000065
AGAGGTAGTAGGTTGCATAGTTTTAGGGCAGGGA	34	hsa-let-7d	8	41	F	1	1	0	0	1	1	0	0	0.5	0.333333	0	0	0.533733	0.624532	9	96941116	96941202	+	MI0000065
AGGTAGTAGGTTGCATAGT	19	hsa-let-7d	10	28	F	1	1	1	1	0	0	0	0	0.5	0.333333	0	0	0.533733	0.624532	9	96941116	96941202	+	MI0000065
TAGTAGGTTGCATAGT	16	hsa-let-7d	13	28	F	0	0	1	1	0	0	0	0	0.333333	0.333333	0	0	0.266867	1.24906	9	96941116	96941202	+	MI0000065
CTATACGACCTGCTGCCTTTCTTA	24	hsa-let-7d	62	85	F	0	0	0	0	0	0	1	0	0.166667	0.333333	0	0	0	#DIV/0!	9	96941116	96941202	+	MI0000065
ACTATACGACCTGCTGCCTTTCT	23	hsa-let-7d	61	83	F	0	0	0	0	0	0	1	0	0.166667	0.333333	0	0	0	#DIV/0!	9	96941116	96941202	+	MI0000065
ACAAGGAGGTAACTATACGAC	21	hsa-let-7d	50	70	F	0	0	0	0	0	0	1	0	0.166667	0.333333	0	0	0	#DIV/0!	9	96941116	96941202	+	MI0000065
AGGTAGTAGGTTGCATAGTTT	21	hsa-let-7d	10	30	F	0	0	0	0	0	1	0	0	0.166667	0.333333	0	0	0	#DIV/0!	9	96941116	96941202	+	MI0000065
ATACGACCTGCTGCCTTTC	19	hsa-let-7d	64	82	F	0	0	0	1	0	0	0	0	0.166667	0.333333	0	0	0	#DIV/0!	9	96941116	96941202	+	MI0000065
GACCTGCTGCCTTTCT	16	hsa-let-7d	68	83	F	0	0	0	0	0	1	0	0	0.166667	0.333333	0	0	0	#DIV/0!	9	96941116	96941202	+	MI0000065
GTAGGTTGCATAGTT	15	hsa-let-7d	15	29	F	0	0	0	1	0	0	0	1	0.166667	0.333333	0.91777	2.75331	0	#DIV/0!	9	96941116	96941202	+	MI0000065
AGAGGTAGTAGGTTGCATAGTTTTAGGGCAGG	32	hsa-let-7d	8	39	F	1	6	0	0	0	0	0	0	1	0	0	#DIV/0!	1.6012	0	9	96941116	96941202	+	MI0000065
TAACTATACGACCTGCTGCCTTT	23	hsa-let-7d	59	81	F	1	2	3	0	0	0	0	1	0.833333	0	0.91777	#DIV/0!	1.33433	0	9	96941116	96941202	+	MI0000065
GAGGTAGTAGGTTGCATAGTTTT	23	hsa-let-7d	9	31	F	1	2	0	0	0	0	0	0	0.333333	0	0	#DIV/0!	0.533733	0	9	96941116	96941202	+	MI0000065
AAGAGGTAGTAGGTTGCAT	19	hsa-let-7d	7	25	F	1	2	0	0	0	0	0	0	0.333333	0	0	#DIV/0!	0.533733	0	9	96941116	96941202	+	MI0000065
GAGGTAGTAGGTTGCATAG	19	hsa-let-7d	9	27	F	0	0	1	0	1	0	0	1	0.333333	0	0.91777	#DIV/0!	0.533733	0	9	96941116	96941202	+	MI0000065
AGTAGGTTGCATAGTT	16	hsa-let-7d	14	29	F	0	0	2	0	0	0	0	2	0.333333	0	1.83554	#DIV/0!	0.533733	0	9	96941116	96941202	+	MI0000065
AAGAGGTAGTAGGTTGCATA	20	hsa-let-7d	7	26	F	0	0	0	0	1	0	0	0	0.166667	0	0	#DIV/0!	0.266867	0	9	96941116	96941202	+	MI0000065
TTAGGGCAGGGATTTTGCC	19	hsa-let-7d	30	48	F	0	0	0	0	1	0	0	0	0.166667	0	0	#DIV/0!	0.266867	0	9	96941116	96941202	+	MI0000065
CGACCTGCTGCCTTTCT	17	hsa-let-7d	67	83	F	0	0	1	0	0	0	0	0	0.166667	0	0	#DIV/0!	0.266867	0	9	96941116	96941202	+	MI0000065
TATACGACCTGCTGCC	16	hsa-let-7d	63	78	F	0	0	0	0	1	0	0	0	0.166667	0	0	#DIV/0!	0.266867	0	9	96941116	96941202	+	MI0000065
AAGAGGTAGTAGGTT	15	hsa-let-7d	7	21	F	1	1	0	0	0	0	0	0	0.166667	0	0	#DIV/0!	0.266867	0	9	96941116	96941202	+	MI0000065
AGAGGTAGTAGGTTGCATAGTTTTA	25	hsa-let-7d	8	32	F	0	0	0	0	0	0	0	1	0	0	0.91777	#DIV/0!	0	#DIV/0!	9	96941116	96941202	+	MI0000065
TTTAGGGCAGGGATTTTGCC	20	hsa-let-7d	29	48	F	0	0	0	0	0	0	0	1	0	0	0.91777	#DIV/0!	0	#DIV/0!	9	96941116	96941202	+	MI0000065
GGTAGTAGGTTGCATAGT	18	hsa-let-7d	11	28	F	0	0	0	0	0	0	0	2	0	0	1.83554	#DIV/0!	0	#DIV/0!	9	96941116	96941202	+	MI0000065
TGAGGTAGGAGGTTGTATAGTT	22	hsa-let-7e	8	29	F	1	53965	34178	74650	47466	42704	27014	82080	46662.8	48122.7	75330.6	1.56539	36189.5	1.32974	19	52196039	52196117	+	MI0000066		vertebrate, near mir-99b which has low syn enrichment
TGAGGTAGGAGGTTGTATAGT	21	hsa-let-7e	8	28	F	1	13516	8104	15658	10454	9817	7425	16772	10829	10966.7	15392.8	1.4036	8559.48	1.28123	19	52196039	52196117	+	MI0000066
TGAGGTAGGAGGTTGTATAGTTG	23	hsa-let-7e	8	30	F	1	1340	906	2078	1178	1164	561	2309	1204.5	1267.67	2119.13	1.67168	913.751	1.38732	19	52196039	52196117	+	MI0000066
TGAGGTAGGAGGTTGTATAG	20	hsa-let-7e	8	27	F	1	1067	689	1053	854	743	645	1100	841.833	813.667	1009.55	1.24074	696.522	1.16819	19	52196039	52196117	+	MI0000066
TGAGGTAGGAGGTTGTAT	18	hsa-let-7e	8	25	F	1	340	348	661	449	306	363	783	411.167	443.333	718.614	1.62093	303.427	1.46109	19	52196039	52196117	+	MI0000066
TGAGGTAGGAGGTTGTA	17	hsa-let-7e	8	24	F	1	195	166	255	187	162	234	421	199.833	217	386.381	1.78056	146.243	1.48383	19	52196039	52196117	+	MI0000066
TGAGGTAGGAGGTTGTATA	19	hsa-let-7e	8	26	F	1	229	142	265	169	166	169	275	190	200	252.387	1.26193	144.108	1.38785	19	52196039	52196117	+	MI0000066
CTATACGGCCTCCTAGCTTTCC	22	hsa-let-7e	53	74	F	1	260	198	207	203	203	112	228	197.167	174	209.252	1.2026	176.399	0.986401	19	52196039	52196117	+	MI0000066
TGAGGTAGGAGGTTGTATAGTTGA	24	hsa-let-7e	8	31	F	1	155	72	121	81	108	58	124	99.1667	95.6667	113.803	1.18958	82.1949	1.1639	19	52196039	52196117	+	MI0000066
TGAGGTAGGAGGTTGT	16	hsa-let-7e	8	23	F	1	40	53	71	61	42	58	112	54.1667	57	102.79	1.80334	41.0975	1.38695	19	52196039	52196117	+	MI0000066
CTATACGGCCTCCTAGCTTTC	21	hsa-let-7e	53	73	F	1	90	30	31	58	50	60	61	53.1667	47	55.984	1.19115	47.5023	0.989426	19	52196039	52196117	+	MI0000066
CTGAGGTAGGAGGTTGTATAGTT	23	hsa-let-7e	7	29	F	1	50	30	62	39	28	20	58	38.1667	36.6667	53.2307	1.45175	31.7571	1.1546	19	52196039	52196117	+	MI0000066
TGAGGTAGGAGGTTG	15	hsa-let-7e	8	22	F	1	15	12	11	12	11	19	15	13.3333	13.6667	13.7665	1.00731	10.4078	1.31312	19	52196039	52196117	+	MI0000066
CTATACGGCCTCCTAGCTTT	20	hsa-let-7e	53	72	F	1	18	6	11	7	9	17	16	11.3333	12.3333	14.6843	1.19062	8.27287	1.49082	19	52196039	52196117	+	MI0000066
TATACGGCCTCCTAGCTTTCC	21	hsa-let-7e	54	74	F	1	8	9	9	9	15	4	1	9	9.33333	0.91777	0.0983325	6.93853	1.34514	19	52196039	52196117	+	MI0000066
GAGGTAGGAGGTTGTATAGTT	21	hsa-let-7e	9	29	F	1	16	9	11	11	7	9	15	10.5	9	13.7665	1.52962	9.6072	0.936797	19	52196039	52196117	+	MI0000066
CTGAGGTAGGAGGTTGTATAGT	22	hsa-let-7e	7	28	F	1	8	4	12	11	5	4	13	7.33333	7	11.931	1.70443	6.13793	1.14045	19	52196039	52196117	+	MI0000066
GAGGTAGGAGGTTGTATAGT	20	hsa-let-7e	9	28	F	1	2	0	10	6	0	3	5	3.5	4.33333	4.58885	1.05897	2.13493	2.02973	19	52196039	52196117	+	MI0000066
TAGGAGGTTGTATAGTT	17	hsa-let-7e	13	29	F	1	1	1	3	2	3	2	6	2	2.66667	5.50662	2.06498	1.06747	2.49813	19	52196039	52196117	+	MI0000066
GAGGTAGGAGGTTGTATAGTTGA	23	hsa-let-7e	9	31	F	1	2	3	2	2	1	3	1	2.16667	2	0.91777	0.458885	1.86807	1.07063	19	52196039	52196117	+	MI0000066
CTATACGGCCTCCTAGCTT	19	hsa-let-7e	53	71	F	1	3	0	2	4	2	1	5	2	1.66667	4.58885	2.75331	1.86807	0.892188	19	52196039	52196117	+	MI0000066
ACTATACGGCCTCCTAGCTTTC	22	hsa-let-7e	52	73	F	1	3	0	1	3	0	4	2	1.83333	1.66667	1.83554	1.10132	1.6012	1.04089	19	52196039	52196117	+	MI0000066
CTATACGGCCTCCTAGCT	18	hsa-let-7e	53	70	F	1	4	0	2	2	1	2	3	1.83333	1.66667	2.75331	1.65199	1.6012	1.04089	19	52196039	52196117	+	MI0000066
AGGAGGTTGTATAGTT	16	hsa-let-7e	14	29	F	1	2	2	1	2	0	3	2	1.66667	1.33333	1.83554	1.37665	1.6012	0.832709	19	52196039	52196117	+	MI0000066
ACTATACGGCCTCCTAGCTTTCC	23	hsa-let-7e	52	74	F	1	1	2	2	2	1	1	0	1.5	1.33333	0	0	1.33433	0.999251	19	52196039	52196117	+	MI0000066
TAGGAGGTTGTATAGT	16	hsa-let-7e	13	28	F	1	1	1	3	1	1	0	0	1.16667	1.33333	0	0	0.8006	1.66542	19	52196039	52196117	+	MI0000066
CACTATACGGCCTCCTAGCTTT	22	hsa-let-7e	51	72	F	0	0	1	0	3	0	3	2	1.16667	1	1.83554	1.83554	1.06747	0.936797	19	52196039	52196117	+	MI0000066
AGGTAGGAGGTTGTATAGTT	20	hsa-let-7e	10	29	F	1	2	2	1	0	2	0	2	1.16667	1	1.83554	1.83554	1.06747	0.936797	19	52196039	52196117	+	MI0000066
GTAGGAGGTTGTATAGTT	18	hsa-let-7e	12	29	F	0	0	0	1	0	2	0	1	0.5	1	0.91777	0.91777	0	#DIV/0!	19	52196039	52196117	+	MI0000066
TATACGGCCTCCTAGCTTTC	20	hsa-let-7e	54	73	F	0	0	5	1	2	0	1	0	1.5	0.666667	0	0	1.86807	0.356875	19	52196039	52196117	+	MI0000066
GAGGTAGGAGGTTGTATAGTTG	22	hsa-let-7e	9	30	F	1	2	0	1	1	0	1	3	0.833333	0.666667	2.75331	4.12997	0.8006	0.832709	19	52196039	52196117	+	MI0000066
GGTAGGAGGTTGTATAGTT	19	hsa-let-7e	11	29	F	1	1	1	0	0	1	1	1	0.666667	0.666667	0.91777	1.37665	0.533733	1.24906	19	52196039	52196117	+	MI0000066
TATACGGCCTCCTAGCTTT	19	hsa-let-7e	54	72	F	1	1	1	0	0	0	2	0	0.666667	0.666667	0	0	0.533733	1.24906	19	52196039	52196117	+	MI0000066
CTGAGGTAGGAGGTTGTATAGTTG	24	hsa-let-7e	7	30	F	0	0	0	2	1	0	0	3	0.5	0.666667	2.75331	4.12997	0.266867	2.49813	19	52196039	52196117	+	MI0000066
TCACTATACGGCCTCCTAGCTTTC	24	hsa-let-7e	50	73	F	0	0	0	2	1	0	0	0	0.5	0.666667	0	0	0.266867	2.49813	19	52196039	52196117	+	MI0000066
TAGGAGGTTGTATAGTTGAGGA	22	hsa-let-7e	13	34	F	0	0	0	2	0	0	0	0	0.333333	0.666667	0	0	0	#DIV/0!	19	52196039	52196117	+	MI0000066
CTGAGGTAGGAGGTTGTAT	19	hsa-let-7e	7	25	F	0	0	0	0	0	0	2	1	0.333333	0.666667	0.91777	1.37665	0	#DIV/0!	19	52196039	52196117	+	MI0000066
AGGTAGGAGGTTGTATAG	18	hsa-let-7e	10	27	F	0	0	0	0	0	2	0	0	0.333333	0.666667	0	0	0	#DIV/0!	19	52196039	52196117	+	MI0000066
CTATACGGCCTCCTA	15	hsa-let-7e	53	67	F	0	0	0	1	0	0	1	0	0.333333	0.666667	0	0	0	#DIV/0!	19	52196039	52196117	+	MI0000066
TGAGGTAGGAGGTTGTATAGTTGAG	25	hsa-let-7e	8	32	F	1	1	0	0	2	1	0	0	0.666667	0.333333	0	0	0.8006	0.416354	19	52196039	52196117	+	MI0000066
GAGGTAGGAGGTTGTATAG	19	hsa-let-7e	9	27	F	1	2	0	1	0	0	0	0	0.5	0.333333	0	0	0.533733	0.624532	19	52196039	52196117	+	MI0000066
AGGTAGGAGGTTGTATAGTTGA	22	hsa-let-7e	10	31	F	0	0	0	0	1	0	1	0	0.333333	0.333333	0	0	0.266867	1.24906	19	52196039	52196117	+	MI0000066
CTGAGGTAGGAGGTTGTATAG	21	hsa-let-7e	7	27	F	0	0	1	1	0	0	0	1	0.333333	0.333333	0.91777	2.75331	0.266867	1.24906	19	52196039	52196117	+	MI0000066
TGAGGTAGGAGGTTGTATAGTTGAGGAGGACACCC	35	hsa-let-7e	8	42	F	0	0	0	0	0	1	0	0	0.166667	0.333333	0	0	0	#DIV/0!	19	52196039	52196117	+	MI0000066
CACTATACGGCCTCCTAGCTTTCC	24	hsa-let-7e	51	74	F	0	0	0	1	0	0	0	0	0.166667	0.333333	0	0	0	#DIV/0!	19	52196039	52196117	+	MI0000066
TAGGAGGTTGTATAGTTGAGGAG	23	hsa-let-7e	13	35	F	0	0	0	1	0	0	0	0	0.166667	0.333333	0	0	0	#DIV/0!	19	52196039	52196117	+	MI0000066
AGGAGGACACCCAAGGAGATCA	22	hsa-let-7e	31	52	F	0	0	0	1	0	0	0	0	0.166667	0.333333	0	0	0	#DIV/0!	19	52196039	52196117	+	MI0000066
GAGGAGGACACCCAAGGAGAT	21	hsa-let-7e	30	50	F	0	0	0	0	0	0	1	0	0.166667	0.333333	0	0	0	#DIV/0!	19	52196039	52196117	+	MI0000066
ACTATACGGCCTCCTAGC	18	hsa-let-7e	52	69	F	0	0	0	0	0	1	0	0	0.166667	0.333333	0	0	0	#DIV/0!	19	52196039	52196117	+	MI0000066
CACTATACGGCCTCCTAG	18	hsa-let-7e	51	68	F	0	0	0	0	0	1	0	0	0.166667	0.333333	0	0	0	#DIV/0!	19	52196039	52196117	+	MI0000066
GTAGGAGGTTGTATAGT	17	hsa-let-7e	12	28	F	0	0	0	0	0	1	0	0	0.166667	0.333333	0	0	0	#DIV/0!	19	52196039	52196117	+	MI0000066
TATACGGCCTCCTAGC	16	hsa-let-7e	54	69	F	0	0	0	0	0	0	1	0	0.166667	0.333333	0	0	0	#DIV/0!	19	52196039	52196117	+	MI0000066
AGGTAGGAGGTTGTA	15	hsa-let-7e	10	24	F	0	0	0	0	0	0	1	0	0.166667	0.333333	0	0	0	#DIV/0!	19	52196039	52196117	+	MI0000066
CACTATACGGCCTCC	15	hsa-let-7e	51	65	F	0	0	0	0	0	0	1	0	0.166667	0.333333	0	0	0	#DIV/0!	19	52196039	52196117	+	MI0000066
GGTAGGAGGTTGTAT	15	hsa-let-7e	11	25	F	0	0	0	0	0	0	1	0	0.166667	0.333333	0	0	0	#DIV/0!	19	52196039	52196117	+	MI0000066
AGGTAGGAGGTTGTATAGTTG	21	hsa-let-7e	10	30	F	0	0	0	0	2	0	0	0	0.333333	0	0	#DIV/0!	0.533733	0	19	52196039	52196117	+	MI0000066
TGAGGTAGGAGGTTGTATAGTTGAGGAGGAC	31	hsa-let-7e	8	38	F	0	0	1	0	0	0	0	0	0.166667	0	0	#DIV/0!	0.266867	0	19	52196039	52196117	+	MI0000066
AGATCACTATACGGCCTCCTAGCTTTCC	28	hsa-let-7e	47	74	F	0	0	0	0	1	0	0	0	0.166667	0	0	#DIV/0!	0.266867	0	19	52196039	52196117	+	MI0000066
AGATCACTATACGGCCTCCTAGCTT	25	hsa-let-7e	47	71	F	0	0	0	0	1	0	0	0	0.166667	0	0	#DIV/0!	0.266867	0	19	52196039	52196117	+	MI0000066
TCACTATACGGCCTCCTAGCTTTCC	25	hsa-let-7e	50	74	F	1	1	0	0	0	0	0	0	0.166667	0	0	#DIV/0!	0.266867	0	19	52196039	52196117	+	MI0000066
GAGGAGGACACCCAAGGAGATCAC	24	hsa-let-7e	30	53	F	1	1	0	0	0	0	0	0	0.166667	0	0	#DIV/0!	0.266867	0	19	52196039	52196117	+	MI0000066
CACTATACGGCCTCCTAGCTTTC	23	hsa-let-7e	51	73	F	0	0	1	0	0	0	0	0	0.166667	0	0	#DIV/0!	0.266867	0	19	52196039	52196117	+	MI0000066
AAGGAGATCACTATACGGCCT	21	hsa-let-7e	43	63	F	1	1	0	0	0	0	0	0	0.166667	0	0	#DIV/0!	0.266867	0	19	52196039	52196117	+	MI0000066
CACTATACGGCCTCCTAGCTT	21	hsa-let-7e	51	71	F	0	0	1	0	0	0	0	0	0.166667	0	0	#DIV/0!	0.266867	0	19	52196039	52196117	+	MI0000066
AGGAGGTTGTATAGT	15	hsa-let-7e	14	28	F	0	0	1	0	0	0	0	0	0.166667	0	0	#DIV/0!	0.266867	0	19	52196039	52196117	+	MI0000066
GCTGAGGTAGGAGGT	15	hsa-let-7e	6	20	F	1	1	0	0	0	0	0	0	0.166667	0	0	#DIV/0!	0.266867	0	19	52196039	52196117	+	MI0000066
TTGTATAGTTGAGGA	15	hsa-let-7e	20	34	F	1	1	0	0	0	0	0	0	0.166667	0	0	#DIV/0!	0.266867	0	19	52196039	52196117	+	MI0000066
TAGGAGGTTGTATAGTTGAGGAGG	24	hsa-let-7e	13	36	F	0	0	0	0	0	0	0	1	0	0	0.91777	#DIV/0!	0	#DIV/0!	19	52196039	52196117	+	MI0000066
TCACTATACGGCCTCCTAGCTTT	23	hsa-let-7e	50	72	F	0	0	0	0	0	0	0	1	0	0	0.91777	#DIV/0!	0	#DIV/0!	19	52196039	52196117	+	MI0000066
GTAGGAGGTTGTATAGTTGAGG	22	hsa-let-7e	12	33	F	0	0	0	0	0	0	0	2	0	0	1.83554	#DIV/0!	0	#DIV/0!	19	52196039	52196117	+	MI0000066
ATCACTATACGGCCTCCTAGC	21	hsa-let-7e	49	69	F	0	0	0	0	0	0	0	1	0	0	0.91777	#DIV/0!	0	#DIV/0!	19	52196039	52196117	+	MI0000066
ATACGGCCTCCTAGCTTTC	19	hsa-let-7e	55	73	F	0	0	0	0	0	0	0	1	0	0	0.91777	#DIV/0!	0	#DIV/0!	19	52196039	52196117	+	MI0000066
ATACGGCCTCCTAGCTTT	18	hsa-let-7e	55	72	F	0	0	0	0	0	0	0	1	0	0	0.91777	#DIV/0!	0	#DIV/0!	19	52196039	52196117	+	MI0000066
GGTAGGAGGTTGTATAGT	18	hsa-let-7e	11	28	F	0	0	0	0	0	0	0	1	0	0	0.91777	#DIV/0!	0	#DIV/0!	19	52196039	52196117	+	MI0000066
TATACGGCCTCCTAGCTT	18	hsa-let-7e	54	71	F	0	0	0	0	0	0	0	1	0	0	0.91777	#DIV/0!	0	#DIV/0!	19	52196039	52196117	+	MI0000066
GAGGTAGGAGGTTGT	15	hsa-let-7e	9	23	F	0	0	0	0	0	0	0	1	0	0	0.91777	#DIV/0!	0	#DIV/0!	19	52196039	52196117	+	MI0000066
TGAGGTAGTAGATTGTATAGTT	22	hsa-let-7f-1	7	28	F	2	758608	318284	554758	380596	396408	423242	594396	471983	458136	545519	1.19074	388955	1.17786	9	96938629	96938715	+	MI0000067
TGAGGTAGTAGATTGTATAGT	21	hsa-let-7f-1	7	27	F	2	212482	78644	98928	86736	89828	138362	114318	117497	109039	104918	0.9622	100839	1.08132	9	96938629	96938715	+	MI0000067
TGAGGTAGTAGATTGTATAG	20	hsa-let-7f-1	7	26	F	2	13568	5632	6814	6028	5730	7714	6746	7581	6752.67	6191.28	0.916864	6732.51	1.00299	9	96938629	96938715	+	MI0000067
TGAGGTAGTAGATTGTA	17	hsa-let-7f-1	7	23	F	2	5476	2142	2336	2316	2196	4512	2860	3163	3014.67	2624.82	0.870684	2651.05	1.13716	9	96938629	96938715	+	MI0000067
TGAGGTAGTAGATTGTAT	18	hsa-let-7f-1	7	24	F	2	3480	1778	2526	2140	1742	2924	2704	2431.67	2397.33	2481.65	1.03517	1974.28	1.21428	9	96938629	96938715	+	MI0000067
TGAGGTAGTAGATTGTATA	19	hsa-let-7f-1	7	25	F	2	4068	1846	2160	1880	1822	2434	2094	2368.33	2138.67	1921.81	0.898602	2079.96	1.02823	9	96938629	96938715	+	MI0000067
TGAGGTAGTAGATTGTATAGTTG	23	hsa-let-7f-1	7	29	F	1	1219	537	850	569	659	507	955	723.5	672	876.47	1.30427	620.465	1.08306	9	96938629	96938715	+	MI0000067
TGAGGTAGTAGATTGT	16	hsa-let-7f-1	7	22	F	2	582	316	468	434	312	672	612	464	484	561.675	1.16049	355.466	1.36159	9	96938629	96938715	+	MI0000067
TGAGGTAGTAGATTG	15	hsa-let-7f-1	7	21	F	2	260	160	214	174	190	546	294	257.333	316.667	269.824	0.852077	158.519	1.99766	9	96938629	96938715	+	MI0000067
GAGGTAGTAGATTGTATAGTT	21	hsa-let-7f-1	8	28	F	2	304	136	192	162	134	280	236	201.333	202	216.594	1.07225	160.654	1.25736	9	96938629	96938715	+	MI0000067
AGTAGATTGTATAGTT	16	hsa-let-7f-1	13	28	F	4	108	140	184	180	124	104	176	140	137.333	161.528	1.17617	114.219	1.20237	9	96938629	96938715	+	MI0000067
AGTAGATTGTATAGT	15	hsa-let-7f-1	13	27	F	4	72	44	108	76	44	60	84	67.3333	70.6667	77.0927	1.09093	51.2384	1.37917	9	96938629	96938715	+	MI0000067
GGTAGTAGATTGTATAGTT	19	hsa-let-7f-1	10	28	F	2	106	66	54	44	58	70	54	66.3333	60.6667	49.5596	0.816916	57.6432	1.05245	9	96938629	96938715	+	MI0000067
GTAGATTGTATAGTT	15	hsa-let-7f-1	14	28	F	4	56	52	44	76	28	100	84	59.3333	57.3333	77.0927	1.34464	49.1035	1.1676	9	96938629	96938715	+	MI0000067
GAGGTAGTAGATTGTATAGT	20	hsa-let-7f-1	8	27	F	2	104	34	46	42	34	86	58	57.6667	55.3333	53.2307	0.962	48.036	1.15191	9	96938629	96938715	+	MI0000067
CTATACAATCTATTGCCTTCC	21	hsa-let-7f-1	63	83	F	1	123	34	36	43	51	73	50	60	53.3333	45.8885	0.860409	53.3733	0.999251	9	96938629	96938715	+	MI0000067
TAGTAGATTGTATAGTT	17	hsa-let-7f-1	12	28	F	2	48	42	42	30	26	28	34	36	32	31.2042	0.975131	32.024	0.999251	9	96938629	96938715	+	MI0000067
GTAGTAGATTGTATAGTT	18	hsa-let-7f-1	11	28	F	2	28	18	18	26	22	56	8	28	32	7.34216	0.229442	19.2144	1.66542	9	96938629	96938715	+	MI0000067
AGGTAGTAGATTGTATAGTTGT	22	hsa-let-7f-1	9	30	F	1	41	13	6	17	26	32	34	22.5	21.3333	31.2042	1.4627	18.9475	1.12592	9	96938629	96938715	+	MI0000067
TGAGGTAGTAGATTGTATAGTTGT	24	hsa-let-7f-1	7	30	F	1	52	14	24	16	24	12	35	23.6667	20	32.1219	1.6061	21.8831	0.913949	9	96938629	96938715	+	MI0000067
AGGTAGTAGATTGTATAGTT	20	hsa-let-7f-1	9	28	F	2	22	14	24	6	4	26	8	16	18	7.34216	0.407898	11.2084	1.60594	9	96938629	96938715	+	MI0000067
GGTAGTAGATTGTATAGT	18	hsa-let-7f-1	10	27	F	2	40	12	6	18	18	20	16	19	14.6667	14.6843	1.0012	18.6807	0.785125	9	96938629	96938715	+	MI0000067
TAGTAGATTGTATAGT	16	hsa-let-7f-1	12	27	F	2	18	12	16	6	4	24	16	13.3333	14.6667	14.6843	1.0012	9.6072	1.52663	9	96938629	96938715	+	MI0000067
GTAGTAGATTGTATAGT	17	hsa-let-7f-1	11	27	F	2	10	2	10	16	6	28	2	12	14.6667	1.83554	0.12515	7.47227	1.96281	9	96938629	96938715	+	MI0000067
AGGTAGTAGATTGTATAGT	19	hsa-let-7f-1	9	27	F	2	12	8	18	8	6	12	4	10.6667	12	3.67108	0.305923	7.47227	1.60594	9	96938629	96938715	+	MI0000067
GAGGTAGTAGATTGTATAG	19	hsa-let-7f-1	8	26	F	2	4	4	0	0	8	12	0	4.66667	6.66667	0	0	2.13493	3.12266	9	96938629	96938715	+	MI0000067
CTATACAATCTATTGCCTTC	20	hsa-let-7f-1	63	82	F	1	7	5	0	7	5	7	6	5.16667	4	5.50662	1.37665	5.07047	0.788882	9	96938629	96938715	+	MI0000067
GAGGTAGTAGATTGTA	16	hsa-let-7f-1	8	23	F	2	6	0	2	0	2	8	0	3	4	0	0	1.6012	2.49813	9	96938629	96938715	+	MI0000067
AGGTAGTAGATTGTATAGTTG	21	hsa-let-7f-1	9	29	F	1	8	3	1	0	3	5	10	3.33333	3	9.1777	3.05923	2.93553	1.02196	9	96938629	96938715	+	MI0000067
TGAGGTAGTAGATTGTATAGTTGTGG	26	hsa-let-7f-1	7	32	F	1	9	3	1	1	6	0	2	3.33333	2.33333	1.83554	0.78666	3.46927	0.672572	9	96938629	96938715	+	MI0000067
GTGAGGTAGTAGATTGTATAGTT	23	hsa-let-7f-1	6	28	F	1	1	0	4	0	0	2	4	1.16667	2	3.67108	1.83554	0.266867	7.49438	9	96938629	96938715	+	MI0000067
AACTATACAATCTATTGCCTTC	22	hsa-let-7f-1	61	82	F	1	2	3	1	1	0	4	0	1.83333	1.66667	0	0	1.6012	1.04089	9	96938629	96938715	+	MI0000067
AACTATACAATCTATTGCCTTCC	23	hsa-let-7f-1	61	83	F	1	2	0	2	2	2	1	0	1.5	1.66667	0	0	1.06747	1.56133	9	96938629	96938715	+	MI0000067
AGTAGATTGTATAGTTG	17	hsa-let-7f-1	13	29	F	1	1	0	4	0	1	0	0	1	1.66667	0	0	0.266867	6.24532	9	96938629	96938715	+	MI0000067
CTATACAATCTATTGCCT	18	hsa-let-7f-1	63	80	F	1	2	2	2	5	0	2	0	2.16667	1.33333	0	0	2.4018	0.555139	9	96938629	96938715	+	MI0000067
TAGTAGATTGTATAGTTGTGGG	22	hsa-let-7f-1	12	33	F	1	3	1	1	0	0	3	1	1.33333	1.33333	0.91777	0.688327	1.06747	1.24906	9	96938629	96938715	+	MI0000067
GGTAGTAGATTGTATAG	17	hsa-let-7f-1	10	26	F	0	0	0	2	0	2	0	0	0.666667	1.33333	0	0	0	#DIV/0!	9	96938629	96938715	+	MI0000067
GAGGTAGTAGATTGTATAGTTG	22	hsa-let-7f-1	8	29	F	1	3	0	0	0	2	1	3	1	1	2.75331	2.75331	0.8006	1.24906	9	96938629	96938715	+	MI0000067
TGAGGTAGTAGATTGTATAGTTGTGGGGTAG	31	hsa-let-7f-1	7	37	F	1	2	0	0	0	3	0	0	0.833333	1	0	0	0.533733	1.87359	9	96938629	96938715	+	MI0000067
TAACTATACAATCTATTGCCTTC	23	hsa-let-7f-1	60	82	F	0	0	0	2	0	1	0	0	0.5	1	0	0	0	#DIV/0!	9	96938629	96938715	+	MI0000067
TAGTAGATTGTATAGTTGTGG	21	hsa-let-7f-1	12	32	F	1	6	1	0	2	2	0	1	1.83333	0.666667	0.91777	1.37665	2.4018	0.27757	9	96938629	96938715	+	MI0000067
TAGTAGATTGTATAGTTGTGGGG	23	hsa-let-7f-1	12	34	F	1	2	0	1	1	0	1	0	0.833333	0.666667	0	0	0.8006	0.832709	9	96938629	96938715	+	MI0000067
CTATACAATCTATTGCCTTCCC	22	hsa-let-7f-1	63	84	F	1	2	0	0	1	1	1	0	0.833333	0.666667	0	0	0.8006	0.832709	9	96938629	96938715	+	MI0000067
GTGAGGTAGTAGATTGTATAGT	22	hsa-let-7f-1	6	27	F	1	2	0	0	0	2	0	2	0.666667	0.666667	1.83554	2.75331	0.533733	1.24906	9	96938629	96938715	+	MI0000067
CTATACAATCTATTGCCTT	19	hsa-let-7f-1	63	81	F	1	1	1	1	0	0	1	0	0.666667	0.666667	0	0	0.533733	1.24906	9	96938629	96938715	+	MI0000067
GGTAGTAGATTGTATA	16	hsa-let-7f-1	10	25	F	0	0	0	0	2	0	2	0	0.666667	0.666667	0	0	0.533733	1.24906	9	96938629	96938715	+	MI0000067
TAGTAGATTGTATAGTTGTGGGGT	24	hsa-let-7f-1	12	35	F	0	0	0	0	1	2	0	0	0.5	0.666667	0	0	0.266867	2.49813	9	96938629	96938715	+	MI0000067
CTATACAATCTATTGCC	17	hsa-let-7f-1	63	79	F	0	0	0	0	0	1	1	0	0.333333	0.666667	0	0	0	#DIV/0!	9	96938629	96938715	+	MI0000067
TGAGGTAGTAGATTGTATAGTTGTGGGGTAGTGA	34	hsa-let-7f-1	7	40	F	1	5	0	0	1	1	0	1	1.16667	0.333333	0.91777	2.75331	1.6012	0.208177	9	96938629	96938715	+	MI0000067
TGAGGTAGTAGATTGTATAGTTGTGGGG	28	hsa-let-7f-1	7	34	F	1	2	0	0	2	1	0	0	0.833333	0.333333	0	0	1.06747	0.312266	9	96938629	96938715	+	MI0000067
CCTGTTCAGGAGATAACTATACAATCTATTGCCT	34	hsa-let-7f-1	47	80	F	0	0	1	0	0	1	0	0	0.333333	0.333333	0	0	0.266867	1.24906	9	96938629	96938715	+	MI0000067
TAACTATACAATCTATTGCCTTCC	24	hsa-let-7f-1	60	83	F	1	1	0	0	0	1	0	0	0.333333	0.333333	0	0	0.266867	1.24906	9	96938629	96938715	+	MI0000067
TGAGGTAGTAGATTGTATAGTTGTG	25	hsa-let-7f-1	7	31	F	0	0	0	1	0	0	0	0	0.166667	0.333333	0	0	0	#DIV/0!	9	96938629	96938715	+	MI0000067
AGATAACTATACAATCTATTGCC	23	hsa-let-7f-1	57	79	F	0	0	0	0	0	1	0	0	0.166667	0.333333	0	0	0	#DIV/0!	9	96938629	96938715	+	MI0000067
TCAGGAGATAACTATACAATC	21	hsa-let-7f-1	52	72	F	0	0	0	0	0	1	0	0	0.166667	0.333333	0	0	0	#DIV/0!	9	96938629	96938715	+	MI0000067
ACTATACAATCTATTGCCT	19	hsa-let-7f-1	62	80	F	0	0	0	0	0	0	1	0	0.166667	0.333333	0	0	0	#DIV/0!	9	96938629	96938715	+	MI0000067
AATCTATTGCCTTCC	15	hsa-let-7f-1	69	83	F	0	0	0	0	0	1	0	0	0.166667	0.333333	0	0	0	#DIV/0!	9	96938629	96938715	+	MI0000067
TAGTAGATTGTATAG	15	hsa-let-7f-1	12	26	F	2	2	6	0	2	0	0	0	1.66667	0	0	#DIV/0!	2.66867	0	9	96938629	96938715	+	MI0000067
TGAGGTAGTAGATTGTATAGTTGTGGG	27	hsa-let-7f-1	7	33	F	1	5	0	0	1	0	0	1	1	0	0.91777	#DIV/0!	1.6012	0	9	96938629	96938715	+	MI0000067
ACTATACAATCTATTGCCTTCC	22	hsa-let-7f-1	62	83	F	1	2	1	0	3	0	0	0	1	0	0	#DIV/0!	1.6012	0	9	96938629	96938715	+	MI0000067
GAGGTAGTAGATTGTAT	17	hsa-let-7f-1	8	24	F	2	2	2	0	2	0	0	0	1	0	0	#DIV/0!	1.6012	0	9	96938629	96938715	+	MI0000067
AACTATACAATCTATTGCCTT	21	hsa-let-7f-1	61	81	F	1	2	1	0	1	0	0	1	0.666667	0	0.91777	#DIV/0!	1.06747	0	9	96938629	96938715	+	MI0000067
AGGTAGTAGATTGTATAG	18	hsa-let-7f-1	9	26	F	2	2	0	0	2	0	0	0	0.666667	0	0	#DIV/0!	1.06747	0	9	96938629	96938715	+	MI0000067
TAGATTGTATAGTTA	15	hsa-let-7f-1	60	74	R	0	0	3	0	0	0	0	0	0.5	0	0	#DIV/0!	0.8006	0	9	96938629	96938715	+	MI0000067
CTGTTCAGGAGATAACTATACAATCTATTGCCTTC	35	hsa-let-7f-1	48	82	F	1	1	0	0	1	0	0	1	0.333333	0	0.91777	#DIV/0!	0.533733	0	9	96938629	96938715	+	MI0000067
AACTATACAATCTATTGCCT	20	hsa-let-7f-1	61	80	F	1	1	1	0	0	0	0	0	0.333333	0	0	#DIV/0!	0.533733	0	9	96938629	96938715	+	MI0000067
TATACAATCTATTGCCTTCC	20	hsa-let-7f-1	64	83	F	1	1	0	0	1	0	0	0	0.333333	0	0	#DIV/0!	0.533733	0	9	96938629	96938715	+	MI0000067
GTAGTAGATTGTATA	15	hsa-let-7f-1	11	25	F	0	0	2	0	0	0	0	0	0.333333	0	0	#DIV/0!	0.533733	0	9	96938629	96938715	+	MI0000067
TGAGGTAGTAGATTGTATAGTTGTGGGGT	29	hsa-let-7f-1	7	35	F	1	1	0	0	0	0	0	0	0.166667	0	0	#DIV/0!	0.266867	0	9	96938629	96938715	+	MI0000067
AGTAGATTGTATAGTTGTGGGG	22	hsa-let-7f-1	13	34	F	1	1	0	0	0	0	0	0	0.166667	0	0	#DIV/0!	0.266867	0	9	96938629	96938715	+	MI0000067
GGTAGTAGATTGTATAGTTG	20	hsa-let-7f-1	10	29	F	0	0	0	0	1	0	0	0	0.166667	0	0	#DIV/0!	0.266867	0	9	96938629	96938715	+	MI0000067
TAGTAGATTGTATAGTTGT	19	hsa-let-7f-1	12	30	F	1	1	0	0	0	0	0	0	0.166667	0	0	#DIV/0!	0.266867	0	9	96938629	96938715	+	MI0000067
GATTGTATAGTTGTGGGG	18	hsa-let-7f-1	17	34	F	0	0	1	0	0	0	0	0	0.166667	0	0	#DIV/0!	0.266867	0	9	96938629	96938715	+	MI0000067
GAGGTAGTAGATTGTATA	18	hsa-let-7f-1	8	25	F	0	0	0	0	0	0	0	2	0	0	1.83554	#DIV/0!	0	#DIV/0!	9	96938629	96938715	+	MI0000067
TAGTAGATTGTATAGTTG	18	hsa-let-7f-1	12	29	F	0	0	0	0	0	0	0	1	0	0	0.91777	#DIV/0!	0	#DIV/0!	9	96938629	96938715	+	MI0000067
TGAGGTAGTAGATTGTATAGTT	22	hsa-let-7f-2	8	29	F	2	758608	318284	554758	380596	396408	423242	594396	471983	458136	545519	1.19074	388955	1.17786	X	53584153	53584235	-	MI0000068
TGAGGTAGTAGATTGTATAGT	21	hsa-let-7f-2	8	28	F	2	212482	78644	98928	86736	89828	138362	114318	117497	109039	104918	0.9622	100839	1.08132	X	53584153	53584235	-	MI0000068
TGAGGTAGTAGATTGTATAG	20	hsa-let-7f-2	8	27	F	2	13568	5632	6814	6028	5730	7714	6746	7581	6752.67	6191.28	0.916864	6732.51	1.00299	X	53584153	53584235	-	MI0000068
TGAGGTAGTAGATTGTATAGTTT	23	hsa-let-7f-2	8	30	F	1	10264	4115	6087	4468	5588	3896	6679	5736.33	5190.33	6129.79	1.181	5029.64	1.03195	X	53584153	53584235	-	MI0000068
TGAGGTAGTAGATTGTA	17	hsa-let-7f-2	8	24	F	2	5476	2142	2336	2316	2196	4512	2860	3163	3014.67	2624.82	0.870684	2651.05	1.13716	X	53584153	53584235	-	MI0000068
TGAGGTAGTAGATTGTAT	18	hsa-let-7f-2	8	25	F	2	3480	1778	2526	2140	1742	2924	2704	2431.67	2397.33	2481.65	1.03517	1974.28	1.21428	X	53584153	53584235	-	MI0000068
TGAGGTAGTAGATTGTATA	19	hsa-let-7f-2	8	26	F	2	4068	1846	2160	1880	1822	2434	2094	2368.33	2138.67	1921.81	0.898602	2079.96	1.02823	X	53584153	53584235	-	MI0000068
TGAGGTAGTAGATTGT	16	hsa-let-7f-2	8	23	F	2	582	316	468	434	312	672	612	464	484	561.675	1.16049	355.466	1.36159	X	53584153	53584235	-	MI0000068
TGAGGTAGTAGATTG	15	hsa-let-7f-2	8	22	F	2	260	160	214	174	190	546	294	257.333	316.667	269.824	0.852077	158.519	1.99766	X	53584153	53584235	-	MI0000068
GAGGTAGTAGATTGTATAGTT	21	hsa-let-7f-2	9	29	F	2	304	136	192	162	134	280	236	201.333	202	216.594	1.07225	160.654	1.25736	X	53584153	53584235	-	MI0000068
AGTAGATTGTATAGTT	16	hsa-let-7f-2	14	29	F	4	108	140	184	180	124	104	176	140	137.333	161.528	1.17617	114.219	1.20237	X	53584153	53584235	-	MI0000068
ATGAGGTAGTAGATTGTATAGTT	23	hsa-let-7f-2	7	29	F	1	181	70	169	121	111	94	200	124.333	124.667	183.554	1.47236	99.2744	1.25578	X	53584153	53584235	-	MI0000068
AGTAGATTGTATAGT	15	hsa-let-7f-2	14	28	F	4	72	44	108	76	44	60	84	67.3333	70.6667	77.0927	1.09093	51.2384	1.37917	X	53584153	53584235	-	MI0000068
GGTAGTAGATTGTATAGTT	19	hsa-let-7f-2	11	29	F	2	106	66	54	44	58	70	54	66.3333	60.6667	49.5596	0.816916	57.6432	1.05245	X	53584153	53584235	-	MI0000068
GTAGATTGTATAGTT	15	hsa-let-7f-2	15	29	F	4	56	52	44	76	28	100	84	59.3333	57.3333	77.0927	1.34464	49.1035	1.1676	X	53584153	53584235	-	MI0000068
GAGGTAGTAGATTGTATAGT	20	hsa-let-7f-2	9	28	F	2	104	34	46	42	34	86	58	57.6667	55.3333	53.2307	0.962	48.036	1.15191	X	53584153	53584235	-	MI0000068
ATGAGGTAGTAGATTGTATAGT	22	hsa-let-7f-2	7	28	F	1	91	44	47	41	45	70	62	56.3333	54	56.9017	1.05374	46.9685	1.14971	X	53584153	53584235	-	MI0000068
TAGTAGATTGTATAGTT	17	hsa-let-7f-2	13	29	F	2	48	42	42	30	26	28	34	36	32	31.2042	0.975131	32.024	0.999251	X	53584153	53584235	-	MI0000068
GTAGTAGATTGTATAGTT	18	hsa-let-7f-2	12	29	F	2	28	18	18	26	22	56	8	28	32	7.34216	0.229442	19.2144	1.66542	X	53584153	53584235	-	MI0000068
TGAGGTAGTAGATTGTATAGTTTT	24	hsa-let-7f-2	8	31	F	1	53	23	35	33	42	14	42	33.3333	30.3333	38.5463	1.27076	29.0885	1.0428	X	53584153	53584235	-	MI0000068
CTATACAGTCTACTGTCTTTC	21	hsa-let-7f-2	58	78	F	1	42	18	10	25	20	40	34	25.8333	23.3333	31.2042	1.33732	22.6837	1.02864	X	53584153	53584235	-	MI0000068
AGGTAGTAGATTGTATAGTT	20	hsa-let-7f-2	10	29	F	2	22	14	24	6	4	26	8	16	18	7.34216	0.407898	11.2084	1.60594	X	53584153	53584235	-	MI0000068
GGTAGTAGATTGTATAGT	18	hsa-let-7f-2	11	28	F	2	40	12	6	18	18	20	16	19	14.6667	14.6843	1.0012	18.6807	0.785125	X	53584153	53584235	-	MI0000068
TAGTAGATTGTATAGT	16	hsa-let-7f-2	13	28	F	2	18	12	16	6	4	24	16	13.3333	14.6667	14.6843	1.0012	9.6072	1.52663	X	53584153	53584235	-	MI0000068
GTAGTAGATTGTATAGT	17	hsa-let-7f-2	12	28	F	2	10	2	10	16	6	28	2	12	14.6667	1.83554	0.12515	7.47227	1.96281	X	53584153	53584235	-	MI0000068
AGGTAGTAGATTGTATAGT	19	hsa-let-7f-2	10	28	F	2	12	8	18	8	6	12	4	10.6667	12	3.67108	0.305923	7.47227	1.60594	X	53584153	53584235	-	MI0000068
CTATACAGTCTACTGTCTTT	20	hsa-let-7f-2	58	77	F	1	16	4	5	7	7	11	12	8.33333	7.66667	11.0132	1.43651	7.2054	1.06402	X	53584153	53584235	-	MI0000068
TTAGGGTCATACCCCATCTTGGA	23	hsa-let-7f-2	30	52	F	1	19	7	12	11	5	5	17	9.83333	7.33333	15.6021	2.12756	9.87407	0.742686	X	53584153	53584235	-	MI0000068
GAGGTAGTAGATTGTATAG	19	hsa-let-7f-2	9	27	F	2	4	4	0	0	8	12	0	4.66667	6.66667	0	0	2.13493	3.12266	X	53584153	53584235	-	MI0000068
CTATACAGTCTACTGT	16	hsa-let-7f-2	58	73	F	1	6	4	3	7	5	10	4	5.83333	6	3.67108	0.611847	4.53673	1.32254	X	53584153	53584235	-	MI0000068
CTATACAGTCTACTGTCT	18	hsa-let-7f-2	58	75	F	1	3	5	8	9	3	4	9	5.33333	5	8.25993	1.65199	4.53673	1.10211	X	53584153	53584235	-	MI0000068
GAGGTAGTAGATTGTA	16	hsa-let-7f-2	9	24	F	2	6	0	2	0	2	8	0	3	4	0	0	1.6012	2.49813	X	53584153	53584235	-	MI0000068
ATGAGGTAGTAGATTGTATAG	21	hsa-let-7f-2	7	27	F	1	3	5	2	1	2	6	1	3.16667	3.33333	0.91777	0.275331	2.4018	1.38785	X	53584153	53584235	-	MI0000068
GAGGTAGTAGATTGTATAGTTT	22	hsa-let-7f-2	9	30	F	1	7	5	1	1	3	5	5	3.66667	3	4.58885	1.52962	3.46927	0.864736	X	53584153	53584235	-	MI0000068
ATGAGGTAGTAGATTGTAT	19	hsa-let-7f-2	7	25	F	1	1	0	1	0	2	2	1	1	1.66667	0.91777	0.550662	0.266867	6.24532	X	53584153	53584235	-	MI0000068
GGTAGTAGATTGTATAGTTT	20	hsa-let-7f-2	11	30	F	1	2	3	2	2	2	0	0	1.83333	1.33333	0	0	1.86807	0.71375	X	53584153	53584235	-	MI0000068
GGTAGTAGATTGTATAG	17	hsa-let-7f-2	11	27	F	0	0	0	2	0	2	0	0	0.666667	1.33333	0	0	0	#DIV/0!	X	53584153	53584235	-	MI0000068
TTAGGGTCATACCCCATCTTGGAG	24	hsa-let-7f-2	30	53	F	1	3	1	1	1	1	1	3	1.33333	1	2.75331	2.75331	1.33433	0.749438	X	53584153	53584235	-	MI0000068
CTATACAGTCTACTGTCTTTCC	22	hsa-let-7f-2	58	79	F	1	1	0	1	1	1	1	2	0.833333	1	1.83554	1.83554	0.533733	1.87359	X	53584153	53584235	-	MI0000068
AGGTAGTAGATTGTATAGTTTT	22	hsa-let-7f-2	10	31	F	0	0	0	0	2	3	0	0	0.833333	1	0	0	0.533733	1.87359	X	53584153	53584235	-	MI0000068
TAGTAGATTGTATAGTTT	18	hsa-let-7f-2	13	30	F	0	0	0	1	0	1	1	0	0.5	1	0	0	0	#DIV/0!	X	53584153	53584235	-	MI0000068
ATGAGGTAGTAGATTGTATAGTTT	24	hsa-let-7f-2	7	30	F	1	5	0	1	3	1	0	2	1.66667	0.666667	1.83554	2.75331	2.13493	0.312266	X	53584153	53584235	-	MI0000068
ATGAGGTAGTAGATTGTATA	20	hsa-let-7f-2	7	26	F	1	3	1	1	3	0	1	2	1.5	0.666667	1.83554	2.75331	1.86807	0.356875	X	53584153	53584235	-	MI0000068
ATGAGGTAGTAGATTGTA	18	hsa-let-7f-2	7	24	F	1	2	2	0	1	1	1	2	1.16667	0.666667	1.83554	2.75331	1.33433	0.499625	X	53584153	53584235	-	MI0000068
GTAGATTGTATAGTTT	16	hsa-let-7f-2	15	30	F	0	0	4	1	0	0	1	1	1	0.666667	0.91777	1.37665	1.06747	0.624532	X	53584153	53584235	-	MI0000068
GGTAGTAGATTGTATA	16	hsa-let-7f-2	11	26	F	0	0	0	0	2	0	2	0	0.666667	0.666667	0	0	0.533733	1.24906	X	53584153	53584235	-	MI0000068
GATGAGGTAGTAGATTGTATAGT	23	hsa-let-7f-2	6	28	F	0	0	0	1	0	0	1	0	0.333333	0.666667	0	0	0	#DIV/0!	X	53584153	53584235	-	MI0000068
AGTAGATTGTATAGTTT	17	hsa-let-7f-2	14	30	F	1	2	1	1	1	0	0	3	0.833333	0.333333	2.75331	8.25993	1.06747	0.312266	X	53584153	53584235	-	MI0000068
CTATACAGTCTACTGTC	17	hsa-let-7f-2	58	74	F	1	1	1	1	2	0	0	0	0.833333	0.333333	0	0	1.06747	0.312266	X	53584153	53584235	-	MI0000068
AACTATACAGTCTACTGTCTTT	22	hsa-let-7f-2	56	77	F	1	1	0	1	1	0	0	0	0.5	0.333333	0	0	0.533733	0.624532	X	53584153	53584235	-	MI0000068
CTATACAGTCTACTGTCTT	19	hsa-let-7f-2	58	76	F	0	0	2	0	0	0	1	1	0.5	0.333333	0.91777	2.75331	0.533733	0.624532	X	53584153	53584235	-	MI0000068
AGATAACTATACAGTCTACTGTC	23	hsa-let-7f-2	52	74	F	0	0	0	0	1	1	0	1	0.333333	0.333333	0.91777	2.75331	0.266867	1.24906	X	53584153	53584235	-	MI0000068
TAGTAGATTGTATAGTTTTAGGG	23	hsa-let-7f-2	13	35	F	0	0	1	0	0	0	1	0	0.333333	0.333333	0	0	0.266867	1.24906	X	53584153	53584235	-	MI0000068
ATAACTATACAGTCTACTGTCT	22	hsa-let-7f-2	54	75	F	1	1	0	1	0	0	0	0	0.333333	0.333333	0	0	0.266867	1.24906	X	53584153	53584235	-	MI0000068
TAACTATACAGTCTACTGTCT	21	hsa-let-7f-2	55	75	F	1	1	0	1	0	0	0	0	0.333333	0.333333	0	0	0.266867	1.24906	X	53584153	53584235	-	MI0000068
AACTATACAGTCTACTGTCT	20	hsa-let-7f-2	56	75	F	1	1	0	0	0	0	1	0	0.333333	0.333333	0	0	0.266867	1.24906	X	53584153	53584235	-	MI0000068
TGAGGTAGTAGATTGTATAGTTTTAG	26	hsa-let-7f-2	8	33	F	0	0	0	0	0	1	0	0	0.166667	0.333333	0	0	0	#DIV/0!	X	53584153	53584235	-	MI0000068
GGAGATAACTATACAGTCTACTGT	24	hsa-let-7f-2	50	73	F	0	0	0	1	0	0	0	0	0.166667	0.333333	0	0	0	#DIV/0!	X	53584153	53584235	-	MI0000068
AACTATACAGTCTACTGTCTTTC	23	hsa-let-7f-2	56	78	F	0	0	0	0	0	1	0	0	0.166667	0.333333	0	0	0	#DIV/0!	X	53584153	53584235	-	MI0000068
GAGGTAGTAGATTGTATAGTTTT	23	hsa-let-7f-2	9	31	F	0	0	0	1	0	0	0	0	0.166667	0.333333	0	0	0	#DIV/0!	X	53584153	53584235	-	MI0000068
AGATAACTATACAGTCTACTGT	22	hsa-let-7f-2	52	73	F	0	0	0	1	0	0	0	0	0.166667	0.333333	0	0	0	#DIV/0!	X	53584153	53584235	-	MI0000068
TAGTAGATTGTATAGTTTT	19	hsa-let-7f-2	13	31	F	0	0	0	1	0	0	0	0	0.166667	0.333333	0	0	0	#DIV/0!	X	53584153	53584235	-	MI0000068
TAGTAGATTGTATAG	15	hsa-let-7f-2	13	27	F	2	2	6	0	2	0	0	0	1.66667	0	0	#DIV/0!	2.66867	0	X	53584153	53584235	-	MI0000068
GAGGTAGTAGATTGTAT	17	hsa-let-7f-2	9	25	F	2	2	2	0	2	0	0	0	1	0	0	#DIV/0!	1.6012	0	X	53584153	53584235	-	MI0000068
AGGTAGTAGATTGTATAG	18	hsa-let-7f-2	10	27	F	2	2	0	0	2	0	0	0	0.666667	0	0	#DIV/0!	1.06747	0	X	53584153	53584235	-	MI0000068
TTAGGGTCATACCCCATCTTGGAGA	25	hsa-let-7f-2	30	54	F	1	1	1	0	1	0	0	0	0.5	0	0	#DIV/0!	0.8006	0	X	53584153	53584235	-	MI0000068
TGAGGTAGTAGATTGTATAGTTTTAGGGT	29	hsa-let-7f-2	8	36	F	1	2	0	0	0	0	0	0	0.333333	0	0	#DIV/0!	0.533733	0	X	53584153	53584235	-	MI0000068
TAACTATACAGTCTACTGTCTTTC	24	hsa-let-7f-2	55	78	F	1	1	0	0	1	0	0	0	0.333333	0	0	#DIV/0!	0.533733	0	X	53584153	53584235	-	MI0000068
GTAGTAGATTGTATA	15	hsa-let-7f-2	12	26	F	0	0	2	0	0	0	0	0	0.333333	0	0	#DIV/0!	0.533733	0	X	53584153	53584235	-	MI0000068
TAGATTGTATAGTTT	15	hsa-let-7f-2	16	30	F	0	0	0	0	2	0	0	0	0.333333	0	0	#DIV/0!	0.533733	0	X	53584153	53584235	-	MI0000068
TTAGGGTCATACCCCATCTTGGAGAT	26	hsa-let-7f-2	30	55	F	0	0	0	0	1	0	0	0	0.166667	0	0	#DIV/0!	0.266867	0	X	53584153	53584235	-	MI0000068
TGGAGATAACTATACAGTCTACTGT	25	hsa-let-7f-2	49	73	F	1	1	0	0	0	0	0	0	0.166667	0	0	#DIV/0!	0.266867	0	X	53584153	53584235	-	MI0000068
ACTATACAGTCTACTGTCTTTC	22	hsa-let-7f-2	57	78	F	1	1	0	0	0	0	0	0	0.166667	0	0	#DIV/0!	0.266867	0	X	53584153	53584235	-	MI0000068
TAACTATACAGTCTACTGTCTT	22	hsa-let-7f-2	55	76	F	1	1	0	0	0	0	0	0	0.166667	0	0	#DIV/0!	0.266867	0	X	53584153	53584235	-	MI0000068
TAGTAGATTGTATAGTTTTAGG	22	hsa-let-7f-2	13	34	F	1	1	0	0	0	0	0	0	0.166667	0	0	#DIV/0!	0.266867	0	X	53584153	53584235	-	MI0000068
TTAGGGTCATACCCCATCTTGG	22	hsa-let-7f-2	30	51	F	1	1	0	0	0	0	0	0	0.166667	0	0	#DIV/0!	0.266867	0	X	53584153	53584235	-	MI0000068
AGGTAGTAGATTGTATAGTTT	21	hsa-let-7f-2	10	30	F	0	0	1	0	0	0	0	0	0.166667	0	0	#DIV/0!	0.266867	0	X	53584153	53584235	-	MI0000068
TAGTAGATTGTATAGTTTTAG	21	hsa-let-7f-2	13	33	F	1	1	0	0	0	0	0	0	0.166667	0	0	#DIV/0!	0.266867	0	X	53584153	53584235	-	MI0000068
TTAGGGTCATACCCCATCT	19	hsa-let-7f-2	30	48	F	0	0	1	0	0	0	0	0	0.166667	0	0	#DIV/0!	0.266867	0	X	53584153	53584235	-	MI0000068
ATGAGGTAGTAGATTGT	17	hsa-let-7f-2	7	23	F	0	0	0	0	1	0	0	0	0.166667	0	0	#DIV/0!	0.266867	0	X	53584153	53584235	-	MI0000068
CAGTCTACTGTCTTTC	16	hsa-let-7f-2	63	78	F	1	1	0	0	0	0	0	0	0.166667	0	0	#DIV/0!	0.266867	0	X	53584153	53584235	-	MI0000068
CTATACAGTCTACTG	15	hsa-let-7f-2	58	72	F	1	1	0	0	0	0	0	0	0.166667	0	0	#DIV/0!	0.266867	0	X	53584153	53584235	-	MI0000068
CTTGGAGATAACTATACAGTCTACTG	26	hsa-let-7f-2	47	72	F	0	0	0	0	0	0	0	1	0	0	0.91777	#DIV/0!	0	#DIV/0!	X	53584153	53584235	-	MI0000068
TGAGGTAGTAGATTGTATAGTTTTA	25	hsa-let-7f-2	8	32	F	0	0	0	0	0	0	0	1	0	0	0.91777	#DIV/0!	0	#DIV/0!	X	53584153	53584235	-	MI0000068
GAGGTAGTAGATTGTATA	18	hsa-let-7f-2	9	26	F	0	0	0	0	0	0	0	2	0	0	1.83554	#DIV/0!	0	#DIV/0!	X	53584153	53584235	-	MI0000068
TGAGGTAGTAGTTTGTACAGTT	22	hsa-let-7g	5	26	F	1	117141	56736	93944	68722	67228	66512	114496	78380.5	75894.7	105081	1.38456	64741.6	1.17227	3	52302294	52302377	-	MI0000433
TGAGGTAGTAGTTTGTACAGT	21	hsa-let-7g	5	25	F	1	29716	11865	14647	13585	13161	18241	19084	16869.2	15349.7	17514.7	1.14105	14722	1.04264	3	52302294	52302377	-	MI0000433
TGAGGTAGTAGTTTGTACAGTTT	23	hsa-let-7g	5	27	F	1	2834	1189	2008	1419	1531	1034	2137	1669.17	1524.33	1961.27	1.28664	1452.29	1.04961	3	52302294	52302377	-	MI0000433
TGAGGTAGTAGTTTGTACAG	20	hsa-let-7g	5	24	F	1	2405	1137	1361	1317	1216	1445	1587	1480.17	1340.67	1456.5	1.0864	1296.71	1.0339	3	52302294	52302377	-	MI0000433
CTGAGGTAGTAGTTTGTACAGTT	23	hsa-let-7g	4	26	F	1	713	403	781	521	535	376	770	554.833	564	706.683	1.25298	436.861	1.29103	3	52302294	52302377	-	MI0000433
TGAGGTAGTAGTTTGTAC	18	hsa-let-7g	5	22	F	1	626	346	351	333	245	373	334	379	323	306.535	0.949025	348.261	0.927465	3	52302294	52302377	-	MI0000433
TGAGGTAGTAGTTTGTACA	19	hsa-let-7g	5	23	F	1	661	309	308	326	237	417	306	376.333	320.667	280.838	0.875793	345.859	0.92716	3	52302294	52302377	-	MI0000433
TGAGGTAGTAGTTTG	15	hsa-let-7g	5	19	F	2	300	184	154	182	146	326	194	215.333	208.667	178.047	0.853262	177.733	1.17404	3	52302294	52302377	-	MI0000433
CTGTACAGGCCACTGCCTTGC	21	hsa-let-7g	62	82	F	1	210	123	141	136	138	203	582	158.5	160.667	534.142	3.32454	125.16	1.28369	3	52302294	52302377	-	MI0000433
CTGAGGTAGTAGTTTGTACAGT	22	hsa-let-7g	4	25	F	1	261	113	155	155	137	176	232	166.167	156	212.923	1.36489	141.172	1.10503	3	52302294	52302377	-	MI0000433
TGAGGTAGTAGTTTGT	16	hsa-let-7g	5	20	F	2	134	38	50	60	40	106	84	71.3333	65.3333	77.0927	1.17999	61.9131	1.05524	3	52302294	52302377	-	MI0000433
TGAGGTAGTAGTTTGTA	17	hsa-let-7g	5	21	F	1	109	33	68	55	51	72	97	64.6667	63.6667	89.0237	1.39828	52.5727	1.21102	3	52302294	52302377	-	MI0000433
GAGGTAGTAGTTTGTACAGTT	21	hsa-let-7g	6	26	F	1	48	20	32	20	21	39	54	30	30.6667	49.5596	1.61607	23.4843	1.30584	3	52302294	52302377	-	MI0000433
ACTGTACAGGCCACTGCCTTGC	22	hsa-let-7g	61	82	F	1	14	15	20	15	10	25	34	16.5	18.3333	31.2042	1.70205	11.7421	1.56133	3	52302294	52302377	-	MI0000433
CTGAGGTAGTAGTTTGTAC	19	hsa-let-7g	4	22	F	1	19	9	25	23	10	10	8	16	15	7.34216	0.489477	13.6102	1.10211	3	52302294	52302377	-	MI0000433
CTGTACAGGCCACTGCCTTGCC	22	hsa-let-7g	62	83	F	1	15	10	7	5	11	15	16	10.5	11	14.6843	1.33494	8.006	1.37397	3	52302294	52302377	-	MI0000433
CTGAGGTAGTAGTTTGTACAGTTT	24	hsa-let-7g	4	27	F	1	14	9	10	11	15	4	15	10.5	9.66667	13.7665	1.42413	9.07347	1.06538	3	52302294	52302377	-	MI0000433
CTGAGGTAGTAGTTTGTACAG	21	hsa-let-7g	4	24	F	1	11	4	8	7	8	10	13	8	8.66667	11.931	1.37666	5.87107	1.47617	3	52302294	52302377	-	MI0000433
AACTGTACAGGCCACTGCCTTGC	23	hsa-let-7g	60	82	F	1	17	7	9	11	5	10	7	9.83333	8	6.42439	0.803049	9.34033	0.8565	3	52302294	52302377	-	MI0000433
CTGAGGTAGTAGTTTGTACA	20	hsa-let-7g	4	23	F	1	10	3	10	5	8	6	2	7	8	1.83554	0.229442	4.8036	1.66542	3	52302294	52302377	-	MI0000433
GAGGTAGTAGTTTGTACAGT	20	hsa-let-7g	6	25	F	1	9	6	6	3	5	9	11	6.33333	6.66667	10.0955	1.51432	4.8036	1.38785	3	52302294	52302377	-	MI0000433
CTGTACAGGCCACTGCCTTG	20	hsa-let-7g	62	81	F	1	8	5	4	4	7	6	12	5.66667	5.66667	11.0132	1.94351	4.53673	1.24906	3	52302294	52302377	-	MI0000433
AGTAGTTTGTACAGTT	16	hsa-let-7g	11	26	F	1	2	4	3	7	8	5	4	4.83333	5.33333	3.67108	0.688327	3.46927	1.53731	3	52302294	52302377	-	MI0000433
GGTAGTAGTTTGTACAGTT	19	hsa-let-7g	8	26	F	1	3	3	3	3	2	3	1	2.83333	2.66667	0.91777	0.344164	2.4018	1.11028	3	52302294	52302377	-	MI0000433
CTGTACAGGCCACTGCCTTGCCA	23	hsa-let-7g	62	84	F	0	0	2	5	4	0	3	13	2.33333	2.66667	11.931	4.47413	1.6012	1.66542	3	52302294	52302377	-	MI0000433
AGTAGTTTGTACAGT	15	hsa-let-7g	11	25	F	1	4	1	2	0	2	4	0	2.16667	2.66667	0	0	1.33433	1.9985	3	52302294	52302377	-	MI0000433
CTGTACAGGCCACTGCC	17	hsa-let-7g	62	78	F	1	3	1	0	2	3	3	3	2	2	2.75331	1.37665	1.6012	1.24906	3	52302294	52302377	-	MI0000433
AACTGTACAGGCCACTGCCTTG	22	hsa-let-7g	60	81	F	1	3	2	4	0	1	1	1	1.83333	2	0.91777	0.458885	1.33433	1.49888	3	52302294	52302377	-	MI0000433
CTGTACAGGCCACTGCCT	18	hsa-let-7g	62	79	F	1	5	1	1	7	1	3	13	3	1.66667	11.931	7.15861	3.46927	0.480409	3	52302294	52302377	-	MI0000433
TGAGGTAGTAGTTTGTACAGTTTG	24	hsa-let-7g	5	28	F	1	7	2	4	3	1	0	6	2.83333	1.66667	5.50662	3.30397	3.2024	0.520443	3	52302294	52302377	-	MI0000433
AGGTAGTAGTTTGTACAGTT	20	hsa-let-7g	7	26	F	1	1	1	1	1	2	2	3	1.33333	1.66667	2.75331	1.65199	0.8006	2.08177	3	52302294	52302377	-	MI0000433
TAGTAGTTTGTACAGTT	17	hsa-let-7g	10	26	F	1	3	0	1	3	0	3	2	1.66667	1.33333	1.83554	1.37665	1.6012	0.832709	3	52302294	52302377	-	MI0000433
CTGTACAGGCCACTG	15	hsa-let-7g	62	76	F	0	0	1	1	0	2	1	1	0.833333	1.33333	0.91777	0.688327	0.266867	4.99625	3	52302294	52302377	-	MI0000433
TAACTGTACAGGCCACTGCCTTGC	24	hsa-let-7g	59	82	F	0	0	2	3	3	0	0	0	1.33333	1	0	0	1.33433	0.749438	3	52302294	52302377	-	MI0000433
CTGAGGTAGTAGTTT	15	hsa-let-7g	4	18	F	0	0	0	0	0	3	0	0	0.5	1	0	0	0	#DIV/0!	3	52302294	52302377	-	MI0000433
TGAGGGTCTATGATACCACCCGGT	24	hsa-let-7g	27	50	F	1	5	0	1	4	0	1	5	1.83333	0.666667	4.58885	6.88328	2.4018	0.27757	3	52302294	52302377	-	MI0000433
TAGTAGTTTGTACAGT	16	hsa-let-7g	10	25	F	1	1	1	0	2	2	0	0	1	0.666667	0	0	1.06747	0.624532	3	52302294	52302377	-	MI0000433
ACTGTACAGGCCACTGCCT	19	hsa-let-7g	61	79	F	0	0	1	1	1	0	1	0	0.666667	0.666667	0	0	0.533733	1.24906	3	52302294	52302377	-	MI0000433
GTAGTTTGTACAGTT	15	hsa-let-7g	12	26	F	0	0	1	1	1	0	1	1	0.666667	0.666667	0.91777	1.37665	0.533733	1.24906	3	52302294	52302377	-	MI0000433
GGTAGTAGTTTGTACAG	17	hsa-let-7g	8	24	F	0	0	0	0	0	1	1	1	0.333333	0.666667	0.91777	1.37665	0	#DIV/0!	3	52302294	52302377	-	MI0000433
CTGAGGTAGTAGTTTGT	17	hsa-let-7g	4	20	F	0	0	0	2	0	0	0	0	0.333333	0.666667	0	0	0	#DIV/0!	3	52302294	52302377	-	MI0000433
CTGAGGTAGTAGTTTG	16	hsa-let-7g	4	19	F	0	0	0	2	0	0	0	2	0.333333	0.666667	1.83554	2.75331	0	#DIV/0!	3	52302294	52302377	-	MI0000433
GAGGTAGTAGTTTGTACAGTTT	22	hsa-let-7g	6	27	F	1	2	1	0	2	0	1	1	1	0.333333	0.91777	2.75331	1.33433	0.249813	3	52302294	52302377	-	MI0000433
TGTACAGGCCACTGCCTTGC	20	hsa-let-7g	63	82	F	1	1	1	0	1	1	0	1	0.666667	0.333333	0.91777	2.75331	0.8006	0.416354	3	52302294	52302377	-	MI0000433
AGGTAGTAGTTTGTACAGT	19	hsa-let-7g	7	25	F	1	2	0	0	0	1	0	0	0.5	0.333333	0	0	0.533733	0.624532	3	52302294	52302377	-	MI0000433
GGTAGTAGTTTGTACAGT	18	hsa-let-7g	8	25	F	0	0	1	1	1	0	0	1	0.5	0.333333	0.91777	2.75331	0.533733	0.624532	3	52302294	52302377	-	MI0000433
AACTGTACAGGCCACTGCCT	20	hsa-let-7g	60	79	F	0	0	1	1	0	0	0	1	0.333333	0.333333	0.91777	2.75331	0.266867	1.24906	3	52302294	52302377	-	MI0000433
CTGAGGTAGTAGTTTGTA	18	hsa-let-7g	4	21	F	1	1	0	1	0	0	0	1	0.333333	0.333333	0.91777	2.75331	0.266867	1.24906	3	52302294	52302377	-	MI0000433
TACCACCCGGTACAGGAGATAACTGTACAGGCCAC	35	hsa-let-7g	40	74	F	0	0	0	0	0	0	1	0	0.166667	0.333333	0	0	0	#DIV/0!	3	52302294	52302377	-	MI0000433
TGAGGGTCTATGATACCACCCGGTACAGGAGATAA	35	hsa-let-7g	27	61	F	0	0	0	0	0	1	0	0	0.166667	0.333333	0	0	0	#DIV/0!	3	52302294	52302377	-	MI0000433
CCCGGTACAGGAGATAACTGTACAGGCCACTGCC	34	hsa-let-7g	45	78	F	0	0	0	0	0	1	0	0	0.166667	0.333333	0	0	0	#DIV/0!	3	52302294	52302377	-	MI0000433
CCGGTACAGGAGATAACTGTACAGGCCACTGCCT	34	hsa-let-7g	46	79	F	0	0	0	0	0	1	0	0	0.166667	0.333333	0	0	0	#DIV/0!	3	52302294	52302377	-	MI0000433
TGAGGTAGTAGTTTGTACAGTTTGAGGG	28	hsa-let-7g	5	32	F	0	0	0	1	0	0	0	0	0.166667	0.333333	0	0	0	#DIV/0!	3	52302294	52302377	-	MI0000433
GATAACTGTACAGGCCACTGCCTTGC	26	hsa-let-7g	57	82	F	0	0	0	0	0	0	1	0	0.166667	0.333333	0	0	0	#DIV/0!	3	52302294	52302377	-	MI0000433
TGAGGGTCTATGATACCACCCGGTA	25	hsa-let-7g	27	51	F	0	0	0	1	0	0	0	1	0.166667	0.333333	0.91777	2.75331	0	#DIV/0!	3	52302294	52302377	-	MI0000433
GTACAGGCCACTGCCTTGCC	20	hsa-let-7g	64	83	F	0	0	0	0	0	1	0	0	0.166667	0.333333	0	0	0	#DIV/0!	3	52302294	52302377	-	MI0000433
GTAGTAGTTTGTACAGT	17	hsa-let-7g	9	25	F	0	0	0	0	0	1	0	0	0.166667	0.333333	0	0	0	#DIV/0!	3	52302294	52302377	-	MI0000433
AGGTAGTAGTTTGTAC	16	hsa-let-7g	7	22	F	0	0	0	1	0	0	0	0	0.166667	0.333333	0	0	0	#DIV/0!	3	52302294	52302377	-	MI0000433
GAGGTAGTAGTTTGTA	16	hsa-let-7g	6	21	F	0	0	0	0	0	1	0	0	0.166667	0.333333	0	0	0	#DIV/0!	3	52302294	52302377	-	MI0000433
AGGCCACTGCCTTGC	15	hsa-let-7g	68	82	F	0	0	0	0	0	0	1	0	0.166667	0.333333	0	0	0	#DIV/0!	3	52302294	52302377	-	MI0000433
CTGTACAGGCCACTGC	16	hsa-let-7g	62	77	F	1	3	1	0	1	0	0	0	0.833333	0	0	#DIV/0!	1.33433	0	3	52302294	52302377	-	MI0000433
ATAACTGTACAGGCCACTGCCTTGC	25	hsa-let-7g	58	82	F	1	3	1	0	0	0	0	0	0.666667	0	0	#DIV/0!	1.06747	0	3	52302294	52302377	-	MI0000433
ACTGTACAGGCCACTGCCTTG	21	hsa-let-7g	61	81	F	0	0	2	0	1	0	0	0	0.5	0	0	#DIV/0!	0.8006	0	3	52302294	52302377	-	MI0000433
CTGTACAGGCCACTGCCTT	19	hsa-let-7g	62	80	F	0	0	2	0	1	0	0	0	0.5	0	0	#DIV/0!	0.8006	0	3	52302294	52302377	-	MI0000433
AGGAGATAACTGTACAGGCCACTGCC	26	hsa-let-7g	53	78	F	1	2	0	0	0	0	0	0	0.333333	0	0	#DIV/0!	0.533733	0	3	52302294	52302377	-	MI0000433
TGAGGGTCTATGATACCACCCGG	23	hsa-let-7g	27	49	F	0	0	2	0	0	0	0	4	0.333333	0	3.67108	#DIV/0!	0.533733	0	3	52302294	52302377	-	MI0000433
AACTGTACAGGCCACTGCC	19	hsa-let-7g	60	78	F	0	0	2	0	0	0	0	0	0.333333	0	0	#DIV/0!	0.533733	0	3	52302294	52302377	-	MI0000433
TGAGGTAGTAGTTTGTACAGTTTGAGGGTCTATGA	35	hsa-let-7g	5	39	F	1	1	0	0	0	0	0	0	0.166667	0	0	#DIV/0!	0.266867	0	3	52302294	52302377	-	MI0000433
TGAGGGTCTATGATACCACCCGGTACAG	28	hsa-let-7g	27	54	F	0	0	1	0	0	0	0	0	0.166667	0	0	#DIV/0!	0.266867	0	3	52302294	52302377	-	MI0000433
ATAACTGTACAGGCCACTGCCTTG	24	hsa-let-7g	58	81	F	0	0	1	0	0	0	0	0	0.166667	0	0	#DIV/0!	0.266867	0	3	52302294	52302377	-	MI0000433
GCTGAGGTAGTAGTTTGTACAGT	23	hsa-let-7g	3	25	F	1	1	0	0	0	0	0	0	0.166667	0	0	#DIV/0!	0.266867	0	3	52302294	52302377	-	MI0000433
GCTGAGGTAGTAGTTTGTACAG	22	hsa-let-7g	3	24	F	1	1	0	0	0	0	0	0	0.166667	0	0	#DIV/0!	0.266867	0	3	52302294	52302377	-	MI0000433
TAGTAGTTTGTACAGTTTGAGG	22	hsa-let-7g	10	31	F	0	0	0	0	1	0	0	0	0.166667	0	0	#DIV/0!	0.266867	0	3	52302294	52302377	-	MI0000433
GAGATAACTGTACAGGCCACT	21	hsa-let-7g	55	75	F	0	0	1	0	0	0	0	0	0.166667	0	0	#DIV/0!	0.266867	0	3	52302294	52302377	-	MI0000433
GAGGTAGTAGTTTGTACAG	19	hsa-let-7g	6	24	F	1	1	0	0	0	0	0	2	0.166667	0	1.83554	#DIV/0!	0.266867	0	3	52302294	52302377	-	MI0000433
AACTGTACAGGCCACTGC	18	hsa-let-7g	60	77	F	0	0	1	0	0	0	0	0	0.166667	0	0	#DIV/0!	0.266867	0	3	52302294	52302377	-	MI0000433
TAGTTTGTACAGTTT	15	hsa-let-7g	13	27	F	1	1	0	0	0	0	0	0	0.166667	0	0	#DIV/0!	0.266867	0	3	52302294	52302377	-	MI0000433
GTAGTAGTTTGTACAGTT	18	hsa-let-7g	9	26	F	0	0	0	0	0	0	0	1	0	0	0.91777	#DIV/0!	0	#DIV/0!	3	52302294	52302377	-	MI0000433
AGTAGTTTGTACAGTTT	17	hsa-let-7g	11	27	F	0	0	0	0	0	0	0	1	0	0	0.91777	#DIV/0!	0	#DIV/0!	3	52302294	52302377	-	MI0000433
TGAGGTAGTAGTTTGTGCTGTT	22	hsa-let-7i	6	27	F	1	62493	30833	35269	30015	30867	40781	50868	38376.3	35639	46685.1	1.30994	32915.6	1.08274	12	62997466	62997549	+	MI0000434
TGAGGTAGTAGTTTGTGCTGT	21	hsa-let-7i	6	26	F	1	9741	5068	5533	5032	5001	6629	7967	6167.33	5721	7311.87	1.27808	5294.9	1.08047	12	62997466	62997549	+	MI0000434
TGAGGTAGTAGTTTGTGC	18	hsa-let-7i	6	23	F	1	2761	1274	1262	1104	1036	1824	1469	1543.5	1374	1348.2	0.981226	1371.43	1.00188	12	62997466	62997549	+	MI0000434
TGAGGTAGTAGTTTGTGCTG	20	hsa-let-7i	6	25	F	1	2098	1117	1229	1072	1080	1368	1525	1327.33	1225.67	1399.6	1.14191	1144.06	1.07133	12	62997466	62997549	+	MI0000434
TGAGGTAGTAGTTTGTGCT	19	hsa-let-7i	6	24	F	1	792	381	506	424	408	415	632	487.667	443	580.031	1.30932	426.186	1.03945	12	62997466	62997549	+	MI0000434
TGAGGTAGTAGTTTG	15	hsa-let-7i	6	20	F	2	300	184	154	182	146	326	194	215.333	208.667	178.047	0.853262	177.733	1.17404	12	62997466	62997549	+	MI0000434
CTGCGCAAGCTACTGCCTTGCT	22	hsa-let-7i	62	83	F	1	251	216	162	209	168	201	383	201.167	177	351.506	1.98591	180.402	0.981143	12	62997466	62997549	+	MI0000434
TGAGGTAGTAGTTTGTGCTGTTG	23	hsa-let-7i	6	28	F	1	344	144	189	162	155	165	253	193.167	169.667	232.196	1.36854	173.463	0.978113	12	62997466	62997549	+	MI0000434
CTGCGCAAGCTACTGCCTTGC	21	hsa-let-7i	62	82	F	1	202	103	90	96	125	154	218	128.333	123	200.074	1.62662	107.014	1.14939	12	62997466	62997549	+	MI0000434
CTGCGCAAGCTACTGCCTTG	20	hsa-let-7i	62	81	F	1	120	63	59	70	74	104	122	81.6667	79	111.968	1.41732	67.5173	1.17007	12	62997466	62997549	+	MI0000434
TGAGGTAGTAGTTTGT	16	hsa-let-7i	6	21	F	2	134	38	50	60	40	106	84	71.3333	65.3333	77.0927	1.17999	61.9131	1.05524	12	62997466	62997549	+	MI0000434
TGAGGTAGTAGTTTGTG	17	hsa-let-7i	6	22	F	1	44	15	14	16	13	23	19	20.8333	16.6667	17.4376	1.04626	20.015	0.832709	12	62997466	62997549	+	MI0000434
CTGCGCAAGCTACTGCCT	18	hsa-let-7i	62	79	F	1	10	8	14	12	7	18	23	11.5	13	21.1087	1.62375	8.006	1.62378	12	62997466	62997549	+	MI0000434
CTGAGGTAGTAGTTTGTGCTGTT	23	hsa-let-7i	5	27	F	1	23	15	24	11	7	7	28	14.5	12.6667	25.6976	2.02875	13.0765	0.968661	12	62997466	62997549	+	MI0000434
GAGGTAGTAGTTTGTGCTGTT	21	hsa-let-7i	7	27	F	1	11	7	9	6	10	11	11	9	10	10.0955	1.00955	6.4048	1.56133	12	62997466	62997549	+	MI0000434
GGTAGTAGTTTGTGCTGTT	19	hsa-let-7i	9	27	F	1	9	4	8	6	0	22	12	8.16667	10	11.0132	1.10132	5.07047	1.97221	12	62997466	62997549	+	MI0000434
TAGTAGTTTGTGCTGTT	17	hsa-let-7i	11	27	F	1	2	2	5	3	5	10	5	4.5	6.66667	4.58885	0.688327	1.86807	3.56875	12	62997466	62997549	+	MI0000434
CTGCGCAAGCTACTGCCTT	19	hsa-let-7i	62	80	F	1	13	5	9	5	5	5	17	7	6.33333	15.6021	2.46349	6.13793	1.03183	12	62997466	62997549	+	MI0000434
GTAGTTTGTGCTGTT	15	hsa-let-7i	13	27	F	1	3	6	4	4	0	9	5	4.33333	4.33333	4.58885	1.05897	3.46927	1.24906	12	62997466	62997549	+	MI0000434
AGTAGTTTGTGCTGTT	16	hsa-let-7i	12	27	F	1	8	4	3	4	3	6	8	4.66667	4	7.34216	1.83554	4.26987	0.936797	12	62997466	62997549	+	MI0000434
GAGGTAGTAGTTTGTGCTGT	20	hsa-let-7i	7	26	F	1	4	2	5	1	4	1	1	2.83333	3.33333	0.91777	0.275331	1.86807	1.78438	12	62997466	62997549	+	MI0000434
CTGCGCAAGCTACTGCC	17	hsa-let-7i	62	78	F	1	2	4	1	0	1	5	6	2.16667	2.33333	5.50662	2.35998	1.6012	1.45724	12	62997466	62997549	+	MI0000434
GTAGTAGTTTGTGCTGTT	18	hsa-let-7i	10	27	F	1	3	1	2	1	1	4	4	2	2.33333	3.67108	1.57332	1.33433	1.74869	12	62997466	62997549	+	MI0000434
CTGAGGTAGTAGTTTGTGCTGT	22	hsa-let-7i	5	26	F	1	3	1	1	3	2	2	3	2	1.66667	2.75331	1.65199	1.86807	0.892188	12	62997466	62997549	+	MI0000434
GAGGTAGTAGTTTGTGCTG	19	hsa-let-7i	7	25	F	0	0	2	1	0	3	1	1	1.16667	1.66667	0.91777	0.550662	0.533733	3.12266	12	62997466	62997549	+	MI0000434
AGGTAGTAGTTTGTGCTGTT	20	hsa-let-7i	8	27	F	1	5	2	2	0	2	0	1	1.83333	1.33333	0.91777	0.688327	1.86807	0.71375	12	62997466	62997549	+	MI0000434
GGTAGTAGTTTGTGC	15	hsa-let-7i	9	23	F	1	4	1	0	3	0	3	0	1.83333	1	0	0	2.13493	0.468399	12	62997466	62997549	+	MI0000434
CTGAGGTAGTAGTTTGTGCT	20	hsa-let-7i	5	24	F	1	2	0	2	2	0	1	1	1.16667	1	0.91777	0.91777	1.06747	0.936797	12	62997466	62997549	+	MI0000434
AGTAGTTTGTGCTGT	15	hsa-let-7i	12	26	F	0	0	3	1	0	1	1	0	1	1	0	0	0.8006	1.24906	12	62997466	62997549	+	MI0000434
TGCGCAAGCTACTGCCTTGCT	21	hsa-let-7i	63	83	F	0	0	0	0	0	0	3	2	0.5	1	1.83554	1.83554	0	#DIV/0!	12	62997466	62997549	+	MI0000434
CTGAGGTAGTAGTTT	15	hsa-let-7i	5	19	F	0	0	0	0	0	3	0	0	0.5	1	0	0	0	#DIV/0!	12	62997466	62997549	+	MI0000434
TGAGGTAGTAGTTTGTGCTGTTGGTCGGGTTG	32	hsa-let-7i	6	37	F	1	4	0	0	0	2	0	0	1	0.666667	0	0	1.06747	0.624532	12	62997466	62997549	+	MI0000434
TGAGGTAGTAGTTTGTGCTGTTGG	24	hsa-let-7i	6	29	F	1	1	1	2	1	0	0	1	0.833333	0.666667	0.91777	1.37665	0.8006	0.832709	12	62997466	62997549	+	MI0000434
TGAGGTAGTAGTTTGTGCTGTTGGT	25	hsa-let-7i	6	30	F	1	1	1	1	0	1	0	0	0.666667	0.666667	0	0	0.533733	1.24906	12	62997466	62997549	+	MI0000434
TAGTAGTTTGTGCTGT	16	hsa-let-7i	11	26	F	0	0	2	1	0	1	0	0	0.666667	0.666667	0	0	0.533733	1.24906	12	62997466	62997549	+	MI0000434
GAGGTAGTAGTTTGTGCT	18	hsa-let-7i	7	24	F	0	0	0	0	0	0	2	0	0.333333	0.666667	0	0	0	#DIV/0!	12	62997466	62997549	+	MI0000434
GCGCAAGCTACTGCCTTG	18	hsa-let-7i	64	81	F	0	0	0	1	0	1	0	0	0.333333	0.666667	0	0	0	#DIV/0!	12	62997466	62997549	+	MI0000434
CTGAGGTAGTAGTTTGT	17	hsa-let-7i	5	21	F	0	0	0	2	0	0	0	0	0.333333	0.666667	0	0	0	#DIV/0!	12	62997466	62997549	+	MI0000434
CTGAGGTAGTAGTTTG	16	hsa-let-7i	5	20	F	0	0	0	2	0	0	0	2	0.333333	0.666667	1.83554	2.75331	0	#DIV/0!	12	62997466	62997549	+	MI0000434
GGTAGTAGTTTGTGCTGT	18	hsa-let-7i	9	26	F	1	3	1	1	3	0	0	3	1.33333	0.333333	2.75331	8.25993	1.86807	0.178438	12	62997466	62997549	+	MI0000434
TGCGCAAGCTACTGCCTTG	19	hsa-let-7i	63	81	F	1	1	1	0	1	0	1	0	0.666667	0.333333	0	0	0.8006	0.416354	12	62997466	62997549	+	MI0000434
GAGGTAGTAGTTTGTGC	17	hsa-let-7i	7	23	F	1	1	1	0	1	0	1	0	0.666667	0.333333	0	0	0.8006	0.416354	12	62997466	62997549	+	MI0000434
TGCGCAAGCTACTGCCTTGC	20	hsa-let-7i	63	82	F	1	1	0	0	1	0	1	1	0.5	0.333333	0.91777	2.75331	0.533733	0.624532	12	62997466	62997549	+	MI0000434
AGGTAGTAGTTTGTGCTGT	19	hsa-let-7i	8	26	F	1	1	1	0	0	1	0	0	0.5	0.333333	0	0	0.533733	0.624532	12	62997466	62997549	+	MI0000434
AAGCTACTGCCTTGCT	16	hsa-let-7i	68	83	F	1	1	0	1	0	0	0	0	0.333333	0.333333	0	0	0.266867	1.24906	12	62997466	62997549	+	MI0000434
TGAGGTAGTAGTTTGTGCTGTTGGTCGGGTTGTGA	35	hsa-let-7i	6	40	F	0	0	0	0	0	1	0	0	0.166667	0.333333	0	0	0	#DIV/0!	12	62997466	62997549	+	MI0000434
TGGTCGGGTTGTGACATTGCCCGCTGTGGAGATAA	35	hsa-let-7i	27	61	F	0	0	0	0	0	1	0	0	0.166667	0.333333	0	0	0	#DIV/0!	12	62997466	62997549	+	MI0000434
TGAGGTAGTAGTTTGTGCTGTTGGTCGGGTTGT	33	hsa-let-7i	6	38	F	0	0	0	0	0	1	0	0	0.166667	0.333333	0	0	0	#DIV/0!	12	62997466	62997549	+	MI0000434
CTGCGCAAGCTACTGCCTTGCTA	23	hsa-let-7i	62	84	F	0	0	0	0	0	0	1	1	0.166667	0.333333	0.91777	2.75331	0	#DIV/0!	12	62997466	62997549	+	MI0000434
CAGCACAAACTACTACCTCAGCC	23	hsa-let-7i	3	25	R	0	0	0	0	0	0	1	0	0.166667	0.333333	0	0	0	#DIV/0!	12	62997466	62997549	+	MI0000434
CAGCACAAACTACTACCTCAGC	22	hsa-let-7i	4	25	R	0	0	0	0	0	1	0	0	0.166667	0.333333	0	0	0	#DIV/0!	12	62997466	62997549	+	MI0000434
CAAGCTACTGCCTTGCT	17	hsa-let-7i	67	83	F	0	0	0	0	0	0	1	0	0.166667	0.333333	0	0	0	#DIV/0!	12	62997466	62997549	+	MI0000434
GGTAGTAGTTTGTGCTG	17	hsa-let-7i	9	25	F	0	0	0	1	0	0	0	0	0.166667	0.333333	0	0	0	#DIV/0!	12	62997466	62997549	+	MI0000434
GAGGTAGTAGTTTGTG	16	hsa-let-7i	7	22	F	0	0	0	0	0	1	0	0	0.166667	0.333333	0	0	0	#DIV/0!	12	62997466	62997549	+	MI0000434
TAGTTTGTGCTGTTG	15	hsa-let-7i	14	28	F	0	0	0	0	0	0	1	0	0.166667	0.333333	0	0	0	#DIV/0!	12	62997466	62997549	+	MI0000434
GTAGTAGTTTGTGCTGT	17	hsa-let-7i	10	26	F	0	0	0	0	2	0	0	0	0.333333	0	0	#DIV/0!	0.533733	0	12	62997466	62997549	+	MI0000434
TGCCCGCTGTGGAGATAACTGCGCAAGCTACTGCC	35	hsa-let-7i	44	78	F	1	1	0	0	0	0	0	0	0.166667	0	0	#DIV/0!	0.266867	0	12	62997466	62997549	+	MI0000434
TTGCCCGCTGTGGAGATAACTGCGCAAGCTACTGC	35	hsa-let-7i	43	77	F	1	1	0	0	0	0	0	0	0.166667	0	0	#DIV/0!	0.266867	0	12	62997466	62997549	+	MI0000434
GCTGTGGAGATAACTGCGCAAGCTACTGCCTTGC	34	hsa-let-7i	49	82	F	0	0	1	0	0	0	0	0	0.166667	0	0	#DIV/0!	0.266867	0	12	62997466	62997549	+	MI0000434
CCGCTGTGGAGATAACTGCGCAAGCTACTGCCT	33	hsa-let-7i	47	79	F	1	1	0	0	0	0	0	1	0.166667	0	0.91777	#DIV/0!	0.266867	0	12	62997466	62997549	+	MI0000434
TAACTGCGCAAGCTACTGCCTTGC	24	hsa-let-7i	59	82	F	1	1	0	0	0	0	0	0	0.166667	0	0	#DIV/0!	0.266867	0	12	62997466	62997549	+	MI0000434
AGGTAGTAGTTTGTGCTGTTG	21	hsa-let-7i	8	28	F	1	1	0	0	0	0	0	0	0.166667	0	0	#DIV/0!	0.266867	0	12	62997466	62997549	+	MI0000434
CTGAGGTAGTAGTTTGTGCTG	21	hsa-let-7i	5	25	F	1	1	0	0	0	0	0	1	0.166667	0	0.91777	#DIV/0!	0.266867	0	12	62997466	62997549	+	MI0000434
GGTAGTAGTTTGTGCT	16	hsa-let-7i	9	24	F	0	0	0	0	1	0	0	0	0.166667	0	0	#DIV/0!	0.266867	0	12	62997466	62997549	+	MI0000434
CTGCGCAAGCTACTG	15	hsa-let-7i	62	76	F	0	0	0	0	1	0	0	1	0.166667	0	0.91777	#DIV/0!	0.266867	0	12	62997466	62997549	+	MI0000434
GTAGTAGTTTGTGCT	15	hsa-let-7i	10	24	F	0	0	0	0	1	0	0	0	0.166667	0	0	#DIV/0!	0.266867	0	12	62997466	62997549	+	MI0000434
AACCCGTAGATCCGAACTTGTG	22	hsa-mir-100	13	34	F	1	142402	35533	41442	47108	58287	60135	36065	64151.2	53288	33099.4	0.621141	60056.5	0.887298	11	122022937	122023016	-	MI0000102	ENSG00000207994
AACCCGTAGATCCGAACTTGT	21	hsa-mir-100	13	33	F	1	92176	21669	24258	32800	36252	53433	20708	43431.3	37981	19005.2	0.500387	39134.7	0.970521	11	122022937	122023016	-	MI0000102	ENSG00000207994
AACCCGTAGATCCGAACTTG	20	hsa-mir-100	13	32	F	1	72273	17683	21528	28096	29856	49458	21559	36482.3	33614	19786.2	0.58863	31504.1	1.06697	11	122022937	122023016	-	MI0000102	ENSG00000207994
AACCCGTAGATCCGAACTTGTGG	23	hsa-mir-100	13	35	F	1	12320	3021	4868	4546	4606	2636	2643	5332.83	4036.67	2425.67	0.600908	5307.18	0.760605	11	122022937	122023016	-	MI0000102	ENSG00000207994
CGTAGATCCGAACTTGT	17	hsa-mir-100	17	33	F	1	3358	1126	1340	2039	1871	5035	1458	2461.5	2748.67	1338.11	0.486821	1740.77	1.57899	11	122022937	122023016	-	MI0000102	ENSG00000207994
AACCCGTAGATCCGAACT	18	hsa-mir-100	13	30	F	1	2700	867	1138	1376	1293	3123	1014	1749.5	1851.33	930.619	0.502675	1319.12	1.40346	11	122022937	122023016	-	MI0000102	ENSG00000207994
CCGTAGATCCGAACTTGT	18	hsa-mir-100	16	33	F	1	2615	752	905	1247	1238	2747	949	1584	1630	870.964	0.534334	1231.32	1.32378	11	122022937	122023016	-	MI0000102	ENSG00000207994
AACCCGTAGATCCGAACTT	19	hsa-mir-100	13	31	F	1	2282	625	658	1127	915	1770	573	1229.5	1114.33	525.882	0.471925	1076.54	1.03511	11	122022937	122023016	-	MI0000102	ENSG00000207994
GTAGATCCGAACTTGT	16	hsa-mir-100	18	33	F	1	967	356	387	598	509	1785	453	767	893.667	415.75	0.465218	512.651	1.74323	11	122022937	122023016	-	MI0000102	ENSG00000207994
CCGTAGATCCGAACTTGTG	19	hsa-mir-100	16	34	F	1	796	254	346	369	376	601	323	457	441	296.44	0.672199	378.684	1.16456	11	122022937	122023016	-	MI0000102	ENSG00000207994
CGTAGATCCGAACTTGTG	18	hsa-mir-100	17	34	F	1	699	228	263	344	338	615	277	414.5	405.333	254.222	0.627193	339.188	1.19501	11	122022937	122023016	-	MI0000102	ENSG00000207994
CGTAGATCCGAACTTG	16	hsa-mir-100	17	32	F	1	274	99	103	154	134	452	141	202.667	229.667	129.406	0.56345	140.639	1.63303	11	122022937	122023016	-	MI0000102	ENSG00000207994
CAAGCTTGTATCTATAGGTATG	22	hsa-mir-100	48	69	F	1	457	130	177	166	226	273	187	238.167	225.333	171.623	0.76164	200.951	1.12134	11	122022937	122023016	-	MI0000102	ENSG00000207994
ACCCGTAGATCCGAACTTGTGG	22	hsa-mir-100	14	35	F	1	346	142	152	224	263	250	186	229.5	221.667	170.705	0.770099	190.009	1.16661	11	122022937	122023016	-	MI0000102	ENSG00000207994
CCGTAGATCCGAACTTG	17	hsa-mir-100	16	32	F	1	247	52	110	118	118	277	101	153.667	168.333	92.6948	0.550662	111.283	1.51265	11	122022937	122023016	-	MI0000102	ENSG00000207994
AACCCGTAGATCCGAAC	17	hsa-mir-100	13	29	F	1	189	57	71	75	111	211	60	119	131	55.0662	0.420353	85.6642	1.52923	11	122022937	122023016	-	MI0000102	ENSG00000207994
GTAGATCCGAACTTGTG	17	hsa-mir-100	18	34	F	1	138	54	73	77	81	184	64	101.167	112.667	58.7373	0.521337	71.7871	1.56945	11	122022937	122023016	-	MI0000102	ENSG00000207994
ACCCGTAGATCCGAACTTGTG	21	hsa-mir-100	14	34	F	1	239	50	64	101	117	144	59	119.167	108.333	54.1484	0.499832	104.078	1.04089	11	122022937	122023016	-	MI0000102	ENSG00000207994
GTAGATCCGAACTTG	15	hsa-mir-100	18	32	F	1	71	33	30	67	37	150	47	64.6667	72.3333	43.1352	0.596339	45.6342	1.58507	11	122022937	122023016	-	MI0000102	ENSG00000207994
CGTAGATCCGAACTTGTGG	19	hsa-mir-100	17	35	F	1	129	39	82	82	45	48	35	70.8333	58.3333	32.1219	0.550662	66.7167	0.874344	11	122022937	122023016	-	MI0000102	ENSG00000207994
CGTAGATCCGAACTT	15	hsa-mir-100	17	31	F	1	68	28	24	47	35	109	44	51.8333	56	40.3819	0.721105	38.1619	1.46743	11	122022937	122023016	-	MI0000102	ENSG00000207994
ACCCGTAGATCCGAACTTG	19	hsa-mir-100	14	32	F	1	69	24	34	37	34	81	27	46.5	49.6667	24.7798	0.498922	34.6927	1.43162	11	122022937	122023016	-	MI0000102	ENSG00000207994
CCGTAGATCCGAACTTGTGG	20	hsa-mir-100	16	35	F	1	132	34	80	63	34	29	35	62	47.6667	32.1219	0.673887	61.1125	0.779983	11	122022937	122023016	-	MI0000102	ENSG00000207994
ACCCGTAGATCCGAACTTGT	20	hsa-mir-100	14	33	F	1	72	28	23	51	36	71	25	46.8333	43.3333	22.9443	0.529483	40.2969	1.07535	11	122022937	122023016	-	MI0000102	ENSG00000207994
CCGTAGATCCGAACTT	16	hsa-mir-100	16	31	F	1	46	23	21	28	29	71	24	36.3333	40.3333	22.0265	0.546111	25.8861	1.55811	11	122022937	122023016	-	MI0000102	ENSG00000207994
CCGTAGATCCGAACT	15	hsa-mir-100	16	30	F	1	23	21	19	21	20	54	14	26.3333	31	12.8488	0.414477	17.3463	1.78712	11	122022937	122023016	-	MI0000102	ENSG00000207994
CCCGTAGATCCGAACTTGT	19	hsa-mir-100	15	33	F	1	46	18	25	10	11	43	4	25.5	26.3333	3.67108	0.139408	19.7481	1.33346	11	122022937	122023016	-	MI0000102	ENSG00000207994
AACCCGTAGATCCGA	15	hsa-mir-100	13	27	F	2	12	4	16	4	12	8	6	9.33333	12	5.50662	0.458885	5.33733	2.24831	11	122022937	122023016	-	MI0000102	ENSG00000207994
CCCGTAGATCCGAACTTGTG	20	hsa-mir-100	15	34	F	1	18	10	12	8	12	11	9	11.8333	11.6667	8.25993	0.707994	9.6072	1.21437	11	122022937	122023016	-	MI0000102	ENSG00000207994
TAGATCCGAACTTGT	15	hsa-mir-100	19	33	F	1	12	4	7	4	10	15	10	8.66667	10.6667	9.1777	0.860409	5.33733	1.9985	11	122022937	122023016	-	MI0000102	ENSG00000207994
AACCCGTAGATCCGAA	16	hsa-mir-100	13	28	F	1	18	8	6	12	5	20	14	11.5	10.3333	12.8488	1.24343	10.1409	1.01897	11	122022937	122023016	-	MI0000102	ENSG00000207994
AACCCGTAGATCCGAACTTGTGGT	24	hsa-mir-100	13	36	F	1	10	5	11	5	7	12	7	8.33333	10	6.42439	0.642439	5.33733	1.87359	11	122022937	122023016	-	MI0000102	ENSG00000207994
GTAGATCCGAACTTGTGG	18	hsa-mir-100	18	35	F	1	25	7	8	12	8	10	10	11.6667	8.66667	9.1777	1.05897	11.7421	0.738083	11	122022937	122023016	-	MI0000102	ENSG00000207994
ACCCGTAGATCCGAACT	17	hsa-mir-100	14	30	F	1	4	2	3	0	2	13	3	4	6	2.75331	0.458885	1.6012	3.74719	11	122022937	122023016	-	MI0000102	ENSG00000207994
CAAGCTTGTATCTATAGGTA	20	hsa-mir-100	48	67	F	1	12	2	4	4	6	1	5	4.83333	3.66667	4.58885	1.2515	4.8036	0.763316	11	122022937	122023016	-	MI0000102	ENSG00000207994
CAAGCTTGTATCTATAGGTAT	21	hsa-mir-100	48	68	F	1	12	3	1	2	2	8	6	4.66667	3.66667	5.50662	1.50181	4.53673	0.808217	11	122022937	122023016	-	MI0000102	ENSG00000207994
CCCGTAGATCCGAACTTG	18	hsa-mir-100	15	32	F	1	3	7	6	2	3	2	3	3.83333	3.66667	2.75331	0.750903	3.2024	1.14497	11	122022937	122023016	-	MI0000102	ENSG00000207994
GCTTGTATCTATAGGTATG	19	hsa-mir-100	51	69	F	1	5	3	0	1	2	9	2	3.33333	3.66667	1.83554	0.500602	2.4018	1.52663	11	122022937	122023016	-	MI0000102	ENSG00000207994
ACAAGCTTGTATCTATAGGTATG	23	hsa-mir-100	47	69	F	1	4	3	2	7	4	4	5	4	3.33333	4.58885	1.37665	3.73613	0.892188	11	122022937	122023016	-	MI0000102	ENSG00000207994
CTTGTATCTATAGGTATG	18	hsa-mir-100	52	69	F	1	1	0	1	3	4	5	3	2.33333	3.33333	2.75331	0.825993	1.06747	3.12266	11	122022937	122023016	-	MI0000102	ENSG00000207994
AAACCCGTAGATCCGAACTTGT	22	hsa-mir-100	12	33	F	1	4	1	4	0	3	2	0	2.33333	3	0	0	1.33433	2.24831	11	122022937	122023016	-	MI0000102	ENSG00000207994
AGCTTGTATCTATAGGTATG	20	hsa-mir-100	50	69	F	0	0	1	3	2	2	4	3	2	3	2.75331	0.91777	0.8006	3.74719	11	122022937	122023016	-	MI0000102	ENSG00000207994
ACCCGTAGATCCGAACTT	18	hsa-mir-100	14	31	F	1	4	0	1	3	0	4	1	2	1.66667	0.91777	0.550662	1.86807	0.892188	11	122022937	122023016	-	MI0000102	ENSG00000207994
CCCGTAGATCCGAACTTGTGG	21	hsa-mir-100	15	35	F	1	4	0	3	1	1	1	0	1.66667	1.66667	0	0	1.33433	1.24906	11	122022937	122023016	-	MI0000102	ENSG00000207994
AAGCTTGTATCTATAGGTATG	21	hsa-mir-100	49	69	F	1	1	1	0	1	3	2	3	1.33333	1.66667	2.75331	1.65199	0.8006	2.08177	11	122022937	122023016	-	MI0000102	ENSG00000207994
CAAGCTTGTATCTATAGGTATGT	23	hsa-mir-100	48	70	F	1	5	4	2	3	2	0	4	2.66667	1.33333	3.67108	2.75331	3.2024	0.416354	11	122022937	122023016	-	MI0000102	ENSG00000207994
CAAGCTTGTATCTATAGGT	19	hsa-mir-100	48	66	F	1	4	2	0	2	1	3	2	2	1.33333	1.83554	1.37665	2.13493	0.624532	11	122022937	122023016	-	MI0000102	ENSG00000207994
CACAAGCTTGTATCTATAGGTATG	24	hsa-mir-100	46	69	F	1	2	1	2	0	2	0	0	1.16667	1.33333	0	0	0.8006	1.66542	11	122022937	122023016	-	MI0000102	ENSG00000207994
CCCGTAGATCCGAACTT	17	hsa-mir-100	15	31	F	1	1	0	2	0	0	1	2	0.666667	1	1.83554	1.83554	0.266867	3.74719	11	122022937	122023016	-	MI0000102	ENSG00000207994
GTATTAGTCCGCACAAGCTTGTATCTATAGGTA	33	hsa-mir-100	35	67	F	1	7	0	0	0	2	0	0	1.5	0.666667	0	0	1.86807	0.356875	11	122022937	122023016	-	MI0000102	ENSG00000207994
AAACCCGTAGATCCGAACTTG	21	hsa-mir-100	12	32	F	1	2	1	0	0	2	0	1	0.833333	0.666667	0.91777	1.37665	0.8006	0.832709	11	122022937	122023016	-	MI0000102	ENSG00000207994
TAGATCCGAACTTGTG	16	hsa-mir-100	19	34	F	1	2	0	0	0	1	1	0	0.666667	0.666667	0	0	0.533733	1.24906	11	122022937	122023016	-	MI0000102	ENSG00000207994
CCGCACAAGCTTGTATCTATAGGTATG	27	hsa-mir-100	43	69	F	0	0	0	0	1	2	0	0	0.5	0.666667	0	0	0.266867	2.49813	11	122022937	122023016	-	MI0000102	ENSG00000207994
AAACCCGTAGATCCGAACTTGTG	23	hsa-mir-100	12	34	F	1	1	0	1	0	0	1	0	0.5	0.666667	0	0	0.266867	2.49813	11	122022937	122023016	-	MI0000102	ENSG00000207994
ACAAGCTTGTATCTATAGGTAT	22	hsa-mir-100	47	68	F	1	1	0	1	0	1	0	0	0.5	0.666667	0	0	0.266867	2.49813	11	122022937	122023016	-	MI0000102	ENSG00000207994
ACAAGCTTGTATCTATAGGTA	21	hsa-mir-100	47	67	F	1	1	0	0	0	1	1	0	0.5	0.666667	0	0	0.266867	2.49813	11	122022937	122023016	-	MI0000102	ENSG00000207994
TTGTATCTATAGGTATG	17	hsa-mir-100	53	69	F	1	1	0	1	0	1	0	0	0.5	0.666667	0	0	0.266867	2.49813	11	122022937	122023016	-	MI0000102	ENSG00000207994
ACCCGTAGATCCGAACTTGTGGT	23	hsa-mir-100	14	36	F	1	1	0	0	1	1	0	0	0.5	0.333333	0	0	0.533733	0.624532	11	122022937	122023016	-	MI0000102	ENSG00000207994
CAAGCTTGTATCTATAGG	18	hsa-mir-100	48	65	F	1	1	1	0	0	1	0	0	0.5	0.333333	0	0	0.533733	0.624532	11	122022937	122023016	-	MI0000102	ENSG00000207994
CGCACAAGCTTGTATCTATAGGTATG	26	hsa-mir-100	44	69	F	1	1	0	0	0	1	0	0	0.333333	0.333333	0	0	0.266867	1.24906	11	122022937	122023016	-	MI0000102	ENSG00000207994
ACAAACCCGTAGATCCGAACTT	22	hsa-mir-100	10	31	F	1	1	0	0	0	0	1	0	0.333333	0.333333	0	0	0.266867	1.24906	11	122022937	122023016	-	MI0000102	ENSG00000207994
CGTAGATCCGAACTTGTGGT	20	hsa-mir-100	17	36	F	0	0	0	1	1	0	0	0	0.333333	0.333333	0	0	0.266867	1.24906	11	122022937	122023016	-	MI0000102	ENSG00000207994
CGTAGATCCGAACTTGTGGTATTAGT	26	hsa-mir-100	17	42	F	0	0	0	0	0	1	0	0	0.166667	0.333333	0	0	0	#DIV/0!	11	122022937	122023016	-	MI0000102	ENSG00000207994
ACAAGCTTGTATCTATAGGTATGT	24	hsa-mir-100	47	70	F	0	0	0	0	0	1	0	0	0.166667	0.333333	0	0	0	#DIV/0!	11	122022937	122023016	-	MI0000102	ENSG00000207994
AGCTTGTATCTATAGGTA	18	hsa-mir-100	50	67	F	0	0	0	1	0	0	0	0	0.166667	0.333333	0	0	0	#DIV/0!	11	122022937	122023016	-	MI0000102	ENSG00000207994
CCCGTAGATCCGAACT	16	hsa-mir-100	15	30	F	0	0	0	0	0	1	0	0	0.166667	0.333333	0	0	0	#DIV/0!	11	122022937	122023016	-	MI0000102	ENSG00000207994
CCCGTAGATCCGAAC	15	hsa-mir-100	15	29	F	0	0	0	0	0	0	1	0	0.166667	0.333333	0	0	0	#DIV/0!	11	122022937	122023016	-	MI0000102	ENSG00000207994
GCACAAGCTTGTATCTATAGGTATG	25	hsa-mir-100	45	69	F	1	2	2	0	0	0	0	0	0.666667	0	0	#DIV/0!	1.06747	0	11	122022937	122023016	-	MI0000102	ENSG00000207994
TCCGCACAAGCTTGTATCTATAGGTATG	28	hsa-mir-100	42	69	F	1	3	0	0	0	0	0	0	0.5	0	0	#DIV/0!	0.8006	0	11	122022937	122023016	-	MI0000102	ENSG00000207994
AACCCGTAGATCCGAACTTGTGGTATTAGTCCG	33	hsa-mir-100	13	45	F	0	0	1	0	0	0	0	0	0.166667	0	0	#DIV/0!	0.266867	0	11	122022937	122023016	-	MI0000102	ENSG00000207994
CAAACCCGTAGATCCGAACTTGTG	24	hsa-mir-100	11	34	F	1	1	0	0	0	0	0	0	0.166667	0	0	#DIV/0!	0.266867	0	11	122022937	122023016	-	MI0000102	ENSG00000207994
CCCGTAGATCCGAACTTGTGGT	22	hsa-mir-100	15	36	F	0	0	0	0	0	0	0	1	0	0	0.91777	#DIV/0!	0	#DIV/0!	11	122022937	122023016	-	MI0000102	ENSG00000207994
GTACAGTACTGTGATAACTGA	21	hsa-mir-101-1	46	66	F	2	99216	40574	42104	47952	49738	54992	44910	55762.7	48944.7	41217.1	0.842115	50102.1	0.976899	1	65524117	65524191	-	MI0000103
GTACAGTACTGTGATAACT	19	hsa-mir-101-1	46	64	F	2	90374	31806	36024	43620	37294	59548	43572	49777.7	44288.7	39989.1	0.902919	44246.5	1.00095	1	65524117	65524191	-	MI0000103
TACAGTACTGTGATAACTGAA	21	hsa-mir-101-1	47	67	F	2	46264	20106	24360	26442	25706	26134	21160	28168.7	25400	19420	0.764567	24768.4	1.0255	1	65524117	65524191	-	MI0000103
GTACAGTACTGTGATAACTGAA	22	hsa-mir-101-1	46	67	F	2	48048	20718	23168	25498	24720	23738	23924	27648.3	23875.3	21956.7	0.919641	25155.9	0.949094	1	65524117	65524191	-	MI0000103
TACAGTACTGTGATAACTGAAG	22	hsa-mir-101-1	47	68	F	2	39502	20442	22840	25428	21924	18464	17446	24766.7	21076	16011.4	0.759699	22782.9	0.925078	1	65524117	65524191	-	MI0000103
TACAGTACTGTGATAACTGA	20	hsa-mir-101-1	47	66	F	2	35746	15422	17226	19630	18884	21978	16586	21481	19362.7	15222.1	0.786159	18893.6	1.02483	1	65524117	65524191	-	MI0000103
GTACAGTACTGTGATAACTG	20	hsa-mir-101-1	46	65	F	2	38518	13386	14224	16424	15926	19926	16592	19734	16692	15227.6	0.912272	18234.5	0.915409	1	65524117	65524191	-	MI0000103
TACAGTACTGTGATAACT	18	hsa-mir-101-1	47	64	F	2	10880	4762	6208	7146	5570	8254	6194	7136.67	6677.33	5684.67	0.851338	6081.36	1.098	1	65524117	65524191	-	MI0000103
TACAGTACTGTGATAACTG	19	hsa-mir-101-1	47	65	F	2	12490	5218	6236	6950	5994	7554	6058	7407	6594.67	5559.85	0.843083	6580.4	1.00217	1	65524117	65524191	-	MI0000103
GTACAGTACTGTGATAAC	18	hsa-mir-101-1	46	63	F	2	6114	2700	2876	3460	3068	4876	3658	3849	3606.67	3357.2	0.930833	3275.52	1.1011	1	65524117	65524191	-	MI0000103
TACAGTACTGTGATAAC	17	hsa-mir-101-1	47	63	F	2	3314	1842	2186	2694	1984	2984	2078	2500.67	2384.67	1907.13	0.799745	2094.9	1.13832	1	65524117	65524191	-	MI0000103
CAGTTATCACAGTGCTGATGC	21	hsa-mir-101-1	11	31	F	1	821	432	546	558	501	338	940	532.667	461.667	862.704	1.86867	483.296	0.955247	1	65524117	65524191	-	MI0000103
GTACAGTACTGTGATA	16	hsa-mir-101-1	46	61	F	2	480	186	256	274	216	624	404	339.333	365.333	370.779	1.01491	250.855	1.45635	1	65524117	65524191	-	MI0000103
TCAGTTATCACAGTGCTGATGC	22	hsa-mir-101-1	10	31	F	1	360	211	280	214	257	166	213	248	234.333	195.485	0.834218	209.49	1.11859	1	65524117	65524191	-	MI0000103
GTACAGTACTGTGATAACTGAAG	23	hsa-mir-101-1	46	68	F	2	276	134	156	178	178	122	176	174	152	161.528	1.06268	156.918	0.968661	1	65524117	65524191	-	MI0000103
TACAGTACTGTGATA	15	hsa-mir-101-1	47	61	F	2	60	26	28	46	54	112	30	54.3333	64.6667	27.5331	0.42577	35.2264	1.83574	1	65524117	65524191	-	MI0000103
GTACAGTACTGTGAT	15	hsa-mir-101-1	46	60	F	2	36	22	26	38	22	94	56	39.6667	47.3333	51.3951	1.08581	25.6192	1.84757	1	65524117	65524191	-	MI0000103
TCAGTTATCACAGTGCTGATG	21	hsa-mir-101-1	10	30	F	1	55	23	33	30	40	63	39	40.6667	45.3333	35.793	0.789552	28.8216	1.57289	1	65524117	65524191	-	MI0000103
TCAGTTATCACAGTGCTGATGCT	23	hsa-mir-101-1	10	32	F	1	66	36	50	35	37	37	22	43.5	41.3333	20.1909	0.48849	36.5607	1.13054	1	65524117	65524191	-	MI0000103
TACAGTACTGTGATAA	16	hsa-mir-101-1	47	62	F	2	36	24	34	64	26	60	32	40.6667	40	29.3686	0.734216	33.0915	1.20877	1	65524117	65524191	-	MI0000103
TCAGTTATCACAGTGCTGA	19	hsa-mir-101-1	10	28	F	1	51	31	28	31	23	62	37	37.6667	37.6667	33.9575	0.901526	30.1559	1.24906	1	65524117	65524191	-	MI0000103
GTACAGTACTGTGATAA	17	hsa-mir-101-1	46	62	F	2	50	26	34	34	16	60	38	36.6667	36.6667	34.8753	0.951143	29.3553	1.24906	1	65524117	65524191	-	MI0000103
CAGTACTGTGATAACTGAA	19	hsa-mir-101-1	49	67	F	2	46	12	28	20	18	40	30	27.3333	28.6667	27.5331	0.960457	20.8156	1.37717	1	65524117	65524191	-	MI0000103
CAGTTATCACAGTGCTGATGCT	22	hsa-mir-101-1	11	32	F	1	58	35	31	29	18	29	64	33.3333	26	58.7373	2.25913	32.5577	0.798581	1	65524117	65524191	-	MI0000103
ACAGTACTGTGATAACTGAA	20	hsa-mir-101-1	48	67	F	2	56	12	14	24	24	32	22	27	23.3333	20.1909	0.865326	24.5517	0.950374	1	65524117	65524191	-	MI0000103
TCAGTTATCACAGTGCTGAT	20	hsa-mir-101-1	10	29	F	1	55	15	18	26	22	29	22	27.5	23	20.1909	0.877867	25.6192	0.897764	1	65524117	65524191	-	MI0000103
ACAGTACTGTGATAACTGAAG	21	hsa-mir-101-1	48	68	F	2	26	14	22	18	16	30	30	21	22.6667	27.5331	1.2147	15.4783	1.46442	1	65524117	65524191	-	MI0000103
ACAGTACTGTGATAACTGA	19	hsa-mir-101-1	48	66	F	2	20	10	12	14	22	32	18	18.3333	22	16.5199	0.750903	11.7421	1.87359	1	65524117	65524191	-	MI0000103
GGTACAGTACTGTGATAACT	20	hsa-mir-101-1	45	64	F	2	28	22	24	16	14	24	34	21.3333	20.6667	31.2042	1.50988	17.6132	1.17336	1	65524117	65524191	-	MI0000103
GTACTGTGATAACTGAA	17	hsa-mir-101-1	51	67	F	2	14	14	20	12	10	28	20	16.3333	19.3333	18.3554	0.949417	10.6747	1.81114	1	65524117	65524191	-	MI0000103
CAGTTATCACAGTGCTGAT	19	hsa-mir-101-1	11	29	F	1	29	13	8	23	13	23	36	18.1667	14.6667	33.0397	2.25271	17.3463	0.84552	1	65524117	65524191	-	MI0000103
AGTACTGTGATAACTGAAG	19	hsa-mir-101-1	50	68	F	2	6	18	10	18	10	20	10	13.6667	13.3333	9.1777	0.688327	11.2084	1.18958	1	65524117	65524191	-	MI0000103
TACAGTACTGTGATAACTGAAGG	23	hsa-mir-101-1	47	69	F	1	23	14	14	13	18	5	19	14.5	12.3333	17.4376	1.41386	13.3433	0.924307	1	65524117	65524191	-	MI0000103
AGTACTGTGATAACTGA	17	hsa-mir-101-1	50	66	F	2	12	4	14	8	12	10	4	10	12	3.67108	0.305923	6.4048	1.87359	1	65524117	65524191	-	MI0000103
CAGTTATCACAGTGCTGATG	20	hsa-mir-101-1	11	30	F	1	30	13	13	18	7	14	20	15.8333	11.3333	18.3554	1.61959	16.2789	0.696199	1	65524117	65524191	-	MI0000103
GTACTGTGATAACTGA	16	hsa-mir-101-1	51	66	F	2	22	4	10	14	10	14	22	12.3333	11.3333	20.1909	1.78155	10.6747	1.0617	1	65524117	65524191	-	MI0000103
ACAGTACTGTGATAACT	17	hsa-mir-101-1	48	64	F	2	20	6	10	6	12	12	10	11	11.3333	9.1777	0.809797	8.53973	1.32713	1	65524117	65524191	-	MI0000103
AGTACTGTGATAACTGAA	18	hsa-mir-101-1	50	67	F	2	20	6	12	4	8	10	6	10	10	5.50662	0.550662	8.006	1.24906	1	65524117	65524191	-	MI0000103
GGTACAGTACTGTGATAACTG	21	hsa-mir-101-1	45	65	F	2	22	10	6	8	12	10	4	11.3333	9.33333	3.67108	0.39333	10.6747	0.874344	1	65524117	65524191	-	MI0000103
ACTGTGATAACTGAA	15	hsa-mir-101-1	53	67	F	2	6	4	2	16	4	22	4	9	9.33333	3.67108	0.39333	6.93853	1.34514	1	65524117	65524191	-	MI0000103
CAGTTATCACAGTGCTGATGCTG	23	hsa-mir-101-1	11	33	F	1	13	4	6	4	8	12	19	7.83333	8.66667	17.4376	2.01203	5.6042	1.54646	1	65524117	65524191	-	MI0000103
CAGTACTGTGATAACTGAAG	20	hsa-mir-101-1	49	68	F	2	10	6	8	18	6	10	4	9.66667	8	3.67108	0.458885	9.07347	0.881692	1	65524117	65524191	-	MI0000103
GTACTGTGATAACTGAAG	18	hsa-mir-101-1	51	68	F	2	4	22	14	6	4	6	16	9.33333	8	14.6843	1.83554	8.53973	0.936797	1	65524117	65524191	-	MI0000103
TCAGTTATCACAGTGCTG	18	hsa-mir-101-1	10	27	F	1	9	6	7	9	3	13	2	7.83333	7.66667	1.83554	0.239418	6.4048	1.19702	1	65524117	65524191	-	MI0000103
CAGTACTGTGATAACTGA	18	hsa-mir-101-1	49	66	F	2	16	4	4	2	14	4	8	7.33333	7.33333	7.34216	1.0012	5.87107	1.24906	1	65524117	65524191	-	MI0000103
TCAGTTATCACAGTGC	16	hsa-mir-101-1	10	25	F	1	5	3	14	2	2	6	3	5.33333	7.33333	2.75331	0.375451	2.66867	2.74794	1	65524117	65524191	-	MI0000103
CAGTTATCACAGTGCTGA	18	hsa-mir-101-1	11	28	F	1	6	3	3	6	3	13	8	5.66667	6.33333	7.34216	1.15929	4.003	1.58215	1	65524117	65524191	-	MI0000103
GGTACAGTACTGTGATAACTGA	22	hsa-mir-101-1	45	66	F	2	14	8	4	8	6	6	2	7.66667	5.33333	1.83554	0.344164	8.006	0.666167	1	65524117	65524191	-	MI0000103
ACTGTGATAACTGAAG	16	hsa-mir-101-1	53	68	F	0	0	2	8	8	4	4	2	4.33333	5.33333	1.83554	0.344164	2.66867	1.9985	1	65524117	65524191	-	MI0000103
CAGTACTGTGATAACT	16	hsa-mir-101-1	49	64	F	2	16	4	2	0	4	8	12	5.66667	4.66667	11.0132	2.35998	5.33733	0.874344	1	65524117	65524191	-	MI0000103
TACTGTGATAACTGAA	16	hsa-mir-101-1	52	67	F	2	2	0	2	2	10	0	2	2.66667	4	1.83554	0.458885	1.06747	3.74719	1	65524117	65524191	-	MI0000103
ACAGTACTGTGATAAC	16	hsa-mir-101-1	48	63	F	2	6	0	0	14	2	8	4	5	3.33333	3.67108	1.10132	5.33733	0.624532	1	65524117	65524191	-	MI0000103
TCAGTTATCACAGTGCT	17	hsa-mir-101-1	10	26	F	1	4	3	2	2	3	5	3	3.16667	3.33333	2.75331	0.825993	2.4018	1.38785	1	65524117	65524191	-	MI0000103
TACAGTACTGTGATAACTGAAGGA	24	hsa-mir-101-1	47	70	F	1	5	2	2	3	4	3	0	3.16667	3	0	0	2.66867	1.12416	1	65524117	65524191	-	MI0000103
AGTACTGTGATAACT	15	hsa-mir-101-1	50	64	F	2	8	4	2	4	2	4	4	4	2.66667	3.67108	1.37665	4.26987	0.624532	1	65524117	65524191	-	MI0000103
TACTGTGATAACTGA	15	hsa-mir-101-1	52	66	F	2	2	8	4	0	0	4	0	3	2.66667	0	0	2.66867	0.999251	1	65524117	65524191	-	MI0000103
TACTGTGATAACTGAAG	17	hsa-mir-101-1	52	68	F	2	4	2	4	8	0	2	0	3.33333	2	0	0	3.73613	0.535313	1	65524117	65524191	-	MI0000103
AAGGTACAGTACTGTGATAACT	22	hsa-mir-101-1	43	64	F	2	4	2	0	4	4	2	6	2.66667	2	5.50662	2.75331	2.66867	0.749438	1	65524117	65524191	-	MI0000103
CAGTACTGTGATAACTG	17	hsa-mir-101-1	49	65	F	2	6	4	4	0	2	0	4	2.66667	2	3.67108	1.83554	2.66867	0.749438	1	65524117	65524191	-	MI0000103
GGTACAGTACTGTGATAACTGAA	23	hsa-mir-101-1	45	67	F	2	4	0	2	0	4	0	6	1.66667	2	5.50662	2.75331	1.06747	1.87359	1	65524117	65524191	-	MI0000103
AGTACTGTGATAACTG	16	hsa-mir-101-1	50	65	F	0	0	0	2	2	0	4	0	1.33333	2	0	0	0.533733	3.74719	1	65524117	65524191	-	MI0000103
CAGTTATCACAGTGC	15	hsa-mir-101-1	11	25	F	1	1	0	1	1	0	5	1	1.33333	2	0.91777	0.458885	0.533733	3.74719	1	65524117	65524191	-	MI0000103
ACAGTACTGTGATAACTG	18	hsa-mir-101-1	48	65	F	0	0	4	0	6	4	0	8	2.33333	1.33333	7.34216	5.50662	2.66867	0.499625	1	65524117	65524191	-	MI0000103
TCAGTTATCACAGTGCTGATGCTG	24	hsa-mir-101-1	10	33	F	1	2	1	1	1	1	2	4	1.33333	1.33333	3.67108	2.75331	1.06747	1.24906	1	65524117	65524191	-	MI0000103
ATTCTAAAGGTACAGTACTGTGATAACTGAA	31	hsa-mir-101-1	37	67	F	1	1	0	0	1	4	0	0	1	1.33333	0	0	0.533733	2.49813	1	65524117	65524191	-	MI0000103
AGGTACAGTACTGTGATAACTGAA	24	hsa-mir-101-1	44	67	F	2	2	0	0	0	2	2	4	1	1.33333	3.67108	2.75331	0.533733	2.49813	1	65524117	65524191	-	MI0000103
CTGTGATAACTGAAG	15	hsa-mir-101-1	54	68	F	0	0	0	2	0	0	2	2	0.666667	1.33333	1.83554	1.37665	0	#DIV/0!	1	65524117	65524191	-	MI0000103
TGTCTATTCTAAAGGTACAGTACTGTGATAACTGA	35	hsa-mir-101-1	32	66	F	1	6	2	1	0	2	0	0	1.83333	1	0	0	2.13493	0.468399	1	65524117	65524191	-	MI0000103
TCTAAAGGTACAGTACTGTGATAACTGAAG	30	hsa-mir-101-1	39	68	F	0	0	0	1	0	2	0	0	0.5	1	0	0	0	#DIV/0!	1	65524117	65524191	-	MI0000103
CAGTACTGTGATAACTGAAGGAT	23	hsa-mir-101-1	49	71	F	0	0	0	1	0	1	1	0	0.5	1	0	0	0	#DIV/0!	1	65524117	65524191	-	MI0000103
AGGTACAGTACTGTGATAACT	21	hsa-mir-101-1	44	64	F	2	8	6	2	0	0	0	16	2.66667	0.666667	14.6843	22.0265	3.73613	0.178438	1	65524117	65524191	-	MI0000103
CAGTACTGTGATAAC	15	hsa-mir-101-1	49	63	F	0	0	2	0	6	2	0	10	1.66667	0.666667	9.1777	13.7666	2.13493	0.312266	1	65524117	65524191	-	MI0000103
GGTACAGTACTGTGATAAC	19	hsa-mir-101-1	45	63	F	0	0	4	0	2	0	2	0	1.33333	0.666667	0	0	1.6012	0.416354	1	65524117	65524191	-	MI0000103
GTACTGTGATAACTG	15	hsa-mir-101-1	51	65	F	2	6	0	0	0	0	2	2	1.33333	0.666667	1.83554	2.75331	1.6012	0.416354	1	65524117	65524191	-	MI0000103
AAAGGTACAGTACTGTGATAACT	23	hsa-mir-101-1	42	64	F	0	0	2	2	2	0	0	2	1	0.666667	1.83554	2.75331	1.06747	0.624532	1	65524117	65524191	-	MI0000103
AGTTATCACAGTGCTGA	17	hsa-mir-101-1	12	28	F	0	0	0	0	1	1	1	0	0.5	0.666667	0	0	0.266867	2.49813	1	65524117	65524191	-	MI0000103
CAGTTATCACAGTGCTG	17	hsa-mir-101-1	11	27	F	1	1	0	0	0	0	2	0	0.5	0.666667	0	0	0.266867	2.49813	1	65524117	65524191	-	MI0000103
ATTCTAAAGGTACAGTACTGTGAT	24	hsa-mir-101-1	37	60	F	0	0	0	2	0	0	0	0	0.333333	0.666667	0	0	0	#DIV/0!	1	65524117	65524191	-	MI0000103
ATTCTAAAGGTACAGTACTGTGATAACT	28	hsa-mir-101-1	37	64	F	1	2	1	0	0	1	0	0	0.666667	0.333333	0	0	0.8006	0.416354	1	65524117	65524191	-	MI0000103
GTTATCACAGTGCTGATGC	19	hsa-mir-101-1	13	31	F	1	2	0	0	0	1	0	1	0.5	0.333333	0.91777	2.75331	0.533733	0.624532	1	65524117	65524191	-	MI0000103
ATTCTAAAGGTACAGTACTGTGATAACTGAAG	32	hsa-mir-101-1	37	68	F	0	0	0	0	0	1	0	1	0.166667	0.333333	0.91777	2.75331	0	#DIV/0!	1	65524117	65524191	-	MI0000103
TCTAAAGGTACAGTACTGTGATAACTGAA	29	hsa-mir-101-1	39	67	F	0	0	0	1	0	0	0	0	0.166667	0.333333	0	0	0	#DIV/0!	1	65524117	65524191	-	MI0000103
CTAAAGGTACAGTACTGTGATAACTGAA	28	hsa-mir-101-1	40	67	F	0	0	0	0	0	1	0	0	0.166667	0.333333	0	0	0	#DIV/0!	1	65524117	65524191	-	MI0000103
TAAAGGTACAGTACTGTGATAACTGAA	27	hsa-mir-101-1	41	67	F	0	0	0	1	0	0	0	0	0.166667	0.333333	0	0	0	#DIV/0!	1	65524117	65524191	-	MI0000103
TAAAGGTACAGTACTGTGATAACTGA	26	hsa-mir-101-1	41	66	F	0	0	0	1	0	0	0	0	0.166667	0.333333	0	0	0	#DIV/0!	1	65524117	65524191	-	MI0000103
TCTAAAGGTACAGTACTGTGATAACT	26	hsa-mir-101-1	39	64	F	0	0	0	0	0	1	0	0	0.166667	0.333333	0	0	0	#DIV/0!	1	65524117	65524191	-	MI0000103
GTTATCACAGTGCTGATGCTGTCT	24	hsa-mir-101-1	13	36	F	0	0	0	0	0	1	0	0	0.166667	0.333333	0	0	0	#DIV/0!	1	65524117	65524191	-	MI0000103
ATTCTAAAGGTACAGTACTGTGA	23	hsa-mir-101-1	37	59	F	0	0	0	1	0	0	0	1	0.166667	0.333333	0.91777	2.75331	0	#DIV/0!	1	65524117	65524191	-	MI0000103
GTCTATTCTAAAGGTACAGTACT	23	hsa-mir-101-1	33	55	F	0	0	0	0	0	1	0	0	0.166667	0.333333	0	0	0	#DIV/0!	1	65524117	65524191	-	MI0000103
ATTCTAAAGGTACAGTACTGTG	22	hsa-mir-101-1	37	58	F	0	0	0	0	0	1	0	2	0.166667	0.333333	1.83554	5.50662	0	#DIV/0!	1	65524117	65524191	-	MI0000103
TAAAGGTACAGTACTGTGATAA	22	hsa-mir-101-1	41	62	F	0	0	0	1	0	0	0	0	0.166667	0.333333	0	0	0	#DIV/0!	1	65524117	65524191	-	MI0000103
TGTCTATTCTAAAGGTACAGT	21	hsa-mir-101-1	32	52	F	0	0	0	0	0	0	1	0	0.166667	0.333333	0	0	0	#DIV/0!	1	65524117	65524191	-	MI0000103
AGTTATCACAGTGCTGATGC	20	hsa-mir-101-1	12	31	F	0	0	0	0	0	0	1	0	0.166667	0.333333	0	0	0	#DIV/0!	1	65524117	65524191	-	MI0000103
CTCAGTTATCACAGTGCTGA	20	hsa-mir-101-1	9	28	F	0	0	0	0	0	1	0	0	0.166667	0.333333	0	0	0	#DIV/0!	1	65524117	65524191	-	MI0000103
TTATCACAGTGCTGATGCTG	20	hsa-mir-101-1	14	33	F	0	0	0	0	0	0	1	0	0.166667	0.333333	0	0	0	#DIV/0!	1	65524117	65524191	-	MI0000103
GTTATCACAGTGCTGATG	18	hsa-mir-101-1	13	30	F	0	0	0	0	0	0	1	0	0.166667	0.333333	0	0	0	#DIV/0!	1	65524117	65524191	-	MI0000103
CAGTTATCACAGTGCT	16	hsa-mir-101-1	11	26	F	0	0	0	0	0	1	0	3	0.166667	0.333333	2.75331	8.25993	0	#DIV/0!	1	65524117	65524191	-	MI0000103
TTATCACAGTGCTGA	15	hsa-mir-101-1	14	28	F	0	0	0	0	0	1	0	0	0.166667	0.333333	0	0	0	#DIV/0!	1	65524117	65524191	-	MI0000103
AAGGTACAGTACTGTGATAACTGAA	25	hsa-mir-101-1	43	67	F	2	2	0	0	2	0	0	2	0.666667	0	1.83554	#DIV/0!	1.06747	0	1	65524117	65524191	-	MI0000103
AAGGTACAGTACTGTGATAACTGA	24	hsa-mir-101-1	43	66	F	0	0	4	0	0	0	0	0	0.666667	0	0	#DIV/0!	1.06747	0	1	65524117	65524191	-	MI0000103
CAGTACTGTGATAACTGAAGGA	22	hsa-mir-101-1	49	70	F	0	0	3	0	0	0	0	0	0.5	0	0	#DIV/0!	0.8006	0	1	65524117	65524191	-	MI0000103
AAAGGTACAGTACTGTGATAACTGAA	26	hsa-mir-101-1	42	67	F	2	2	0	0	0	0	0	0	0.333333	0	0	#DIV/0!	0.533733	0	1	65524117	65524191	-	MI0000103
AAAGGTACAGTACTGTGATAACTG	24	hsa-mir-101-1	42	65	F	0	0	2	0	0	0	0	0	0.333333	0	0	#DIV/0!	0.533733	0	1	65524117	65524191	-	MI0000103
AAGGTACAGTACTGTGATAACTG	23	hsa-mir-101-1	43	65	F	2	2	0	0	0	0	0	0	0.333333	0	0	#DIV/0!	0.533733	0	1	65524117	65524191	-	MI0000103
AGGTACAGTACTGTGATAACTG	22	hsa-mir-101-1	44	65	F	2	2	0	0	0	0	0	0	0.333333	0	0	#DIV/0!	0.533733	0	1	65524117	65524191	-	MI0000103
TCTATTCTAAAGGTACAGTACT	22	hsa-mir-101-1	34	55	F	1	2	0	0	0	0	0	0	0.333333	0	0	#DIV/0!	0.533733	0	1	65524117	65524191	-	MI0000103
TATCACAGTGCTGATGCTG	19	hsa-mir-101-1	15	33	F	0	0	2	0	0	0	0	1	0.333333	0	0.91777	#DIV/0!	0.533733	0	1	65524117	65524191	-	MI0000103
TCTATTCTAAAGGTACAGTACTGTGATAACTGAA	34	hsa-mir-101-1	34	67	F	1	1	0	0	0	0	0	0	0.166667	0	0	#DIV/0!	0.266867	0	1	65524117	65524191	-	MI0000103
TACAGTACTGTGATAACTGAAGGAT	25	hsa-mir-101-1	47	71	F	1	1	0	0	0	0	0	0	0.166667	0	0	#DIV/0!	0.266867	0	1	65524117	65524191	-	MI0000103
TGTCTATTCTAAAGGTACAGTACTG	25	hsa-mir-101-1	32	56	F	0	0	0	0	1	0	0	2	0.166667	0	1.83554	#DIV/0!	0.266867	0	1	65524117	65524191	-	MI0000103
TCTATTCTAAAGGTACAGTACTG	23	hsa-mir-101-1	34	56	F	1	1	0	0	0	0	0	0	0.166667	0	0	#DIV/0!	0.266867	0	1	65524117	65524191	-	MI0000103
AGTTATCACAGTGCTGATGCTG	22	hsa-mir-101-1	12	33	F	1	1	0	0	0	0	0	0	0.166667	0	0	#DIV/0!	0.266867	0	1	65524117	65524191	-	MI0000103
AGTTATCACAGTGCTGATGCT	21	hsa-mir-101-1	12	32	F	0	0	0	0	1	0	0	0	0.166667	0	0	#DIV/0!	0.266867	0	1	65524117	65524191	-	MI0000103
CAGTACTGTGATAACTGAAGG	21	hsa-mir-101-1	49	69	F	0	0	0	0	1	0	0	0	0.166667	0	0	#DIV/0!	0.266867	0	1	65524117	65524191	-	MI0000103
AGTTATCACAGTGCT	15	hsa-mir-101-1	12	26	F	0	0	0	0	1	0	0	0	0.166667	0	0	#DIV/0!	0.266867	0	1	65524117	65524191	-	MI0000103
CAGTTATCACAGTGCTGATGCTGT	24	hsa-mir-101-1	11	34	F	0	0	0	0	0	0	0	1	0	0	0.91777	#DIV/0!	0	#DIV/0!	1	65524117	65524191	-	MI0000103
TAAAGGTACAGTACTGTGATAACT	24	hsa-mir-101-1	41	64	F	0	0	0	0	0	0	0	1	0	0	0.91777	#DIV/0!	0	#DIV/0!	1	65524117	65524191	-	MI0000103
AGGTACAGTACTGTGATAACTGA	23	hsa-mir-101-1	44	66	F	0	0	0	0	0	0	0	2	0	0	1.83554	#DIV/0!	0	#DIV/0!	1	65524117	65524191	-	MI0000103
TAAAGGTACAGTACTGTGATAAC	23	hsa-mir-101-1	41	63	F	0	0	0	0	0	0	0	3	0	0	2.75331	#DIV/0!	0	#DIV/0!	1	65524117	65524191	-	MI0000103
GTTATCACAGTGCTGATGCTG	21	hsa-mir-101-1	13	33	F	0	0	0	0	0	0	0	1	0	0	0.91777	#DIV/0!	0	#DIV/0!	1	65524117	65524191	-	MI0000103
GTACAGTACTGTGATAACTGA	21	hsa-mir-101-2	48	68	F	2	99216	40574	42104	47952	49738	54992	44910	55762.7	48944.7	41217.1	0.842115	50102.1	0.976899	9	4850297	4850375	+	MI0000739
GTACAGTACTGTGATAACT	19	hsa-mir-101-2	48	66	F	2	90374	31806	36024	43620	37294	59548	43572	49777.7	44288.7	39989.1	0.902919	44246.5	1.00095	9	4850297	4850375	+	MI0000739
TACAGTACTGTGATAACTGAA	21	hsa-mir-101-2	49	69	F	2	46264	20106	24360	26442	25706	26134	21160	28168.7	25400	19420	0.764567	24768.4	1.0255	9	4850297	4850375	+	MI0000739
GTACAGTACTGTGATAACTGAA	22	hsa-mir-101-2	48	69	F	2	48048	20718	23168	25498	24720	23738	23924	27648.3	23875.3	21956.7	0.919641	25155.9	0.949094	9	4850297	4850375	+	MI0000739
TACAGTACTGTGATAACTGAAG	22	hsa-mir-101-2	49	70	F	2	39502	20442	22840	25428	21924	18464	17446	24766.7	21076	16011.4	0.759699	22782.9	0.925078	9	4850297	4850375	+	MI0000739
TACAGTACTGTGATAACTGA	20	hsa-mir-101-2	49	68	F	2	35746	15422	17226	19630	18884	21978	16586	21481	19362.7	15222.1	0.786159	18893.6	1.02483	9	4850297	4850375	+	MI0000739
GTACAGTACTGTGATAACTG	20	hsa-mir-101-2	48	67	F	2	38518	13386	14224	16424	15926	19926	16592	19734	16692	15227.6	0.912272	18234.5	0.915409	9	4850297	4850375	+	MI0000739
TACAGTACTGTGATAACT	18	hsa-mir-101-2	49	66	F	2	10880	4762	6208	7146	5570	8254	6194	7136.67	6677.33	5684.67	0.851338	6081.36	1.098	9	4850297	4850375	+	MI0000739
TACAGTACTGTGATAACTG	19	hsa-mir-101-2	49	67	F	2	12490	5218	6236	6950	5994	7554	6058	7407	6594.67	5559.85	0.843083	6580.4	1.00217	9	4850297	4850375	+	MI0000739
GTACAGTACTGTGATAAC	18	hsa-mir-101-2	48	65	F	2	6114	2700	2876	3460	3068	4876	3658	3849	3606.67	3357.2	0.930833	3275.52	1.1011	9	4850297	4850375	+	MI0000739
TACAGTACTGTGATAAC	17	hsa-mir-101-2	49	65	F	2	3314	1842	2186	2694	1984	2984	2078	2500.67	2384.67	1907.13	0.799745	2094.9	1.13832	9	4850297	4850375	+	MI0000739
TACAGTACTGTGATAACTGAAGA	23	hsa-mir-101-2	49	71	F	1	2460	1040	1289	1374	1321	1226	1026	1451.67	1278.67	941.632	0.736417	1300.71	0.983054	9	4850297	4850375	+	MI0000739
GTACAGTACTGTGATA	16	hsa-mir-101-2	48	63	F	2	480	186	256	274	216	624	404	339.333	365.333	370.779	1.01491	250.855	1.45635	9	4850297	4850375	+	MI0000739
GTACAGTACTGTGATAACTGAAG	23	hsa-mir-101-2	48	70	F	2	276	134	156	178	178	122	176	174	152	161.528	1.06268	156.918	0.968661	9	4850297	4850375	+	MI0000739
TACAGTACTGTGATA	15	hsa-mir-101-2	49	63	F	2	60	26	28	46	54	112	30	54.3333	64.6667	27.5331	0.42577	35.2264	1.83574	9	4850297	4850375	+	MI0000739
GTACAGTACTGTGAT	15	hsa-mir-101-2	48	62	F	2	36	22	26	38	22	94	56	39.6667	47.3333	51.3951	1.08581	25.6192	1.84757	9	4850297	4850375	+	MI0000739
TACAGTACTGTGATAA	16	hsa-mir-101-2	49	64	F	2	36	24	34	64	26	60	32	40.6667	40	29.3686	0.734216	33.0915	1.20877	9	4850297	4850375	+	MI0000739
GTACAGTACTGTGATAA	17	hsa-mir-101-2	48	64	F	2	50	26	34	34	16	60	38	36.6667	36.6667	34.8753	0.951143	29.3553	1.24906	9	4850297	4850375	+	MI0000739
TACAGTACTGTGATAACTGAAGAA	24	hsa-mir-101-2	49	72	F	1	62	24	31	25	34	25	18	33.5	30	16.5199	0.550662	29.6222	1.01275	9	4850297	4850375	+	MI0000739
CAGTACTGTGATAACTGAA	19	hsa-mir-101-2	51	69	F	2	46	12	28	20	18	40	30	27.3333	28.6667	27.5331	0.960457	20.8156	1.37717	9	4850297	4850375	+	MI0000739
ACAGTACTGTGATAACTGAA	20	hsa-mir-101-2	50	69	F	2	56	12	14	24	24	32	22	27	23.3333	20.1909	0.865326	24.5517	0.950374	9	4850297	4850375	+	MI0000739
ACAGTACTGTGATAACTGAAG	21	hsa-mir-101-2	50	70	F	2	26	14	22	18	16	30	30	21	22.6667	27.5331	1.2147	15.4783	1.46442	9	4850297	4850375	+	MI0000739
ACAGTACTGTGATAACTGA	19	hsa-mir-101-2	50	68	F	2	20	10	12	14	22	32	18	18.3333	22	16.5199	0.750903	11.7421	1.87359	9	4850297	4850375	+	MI0000739
GGTACAGTACTGTGATAACT	20	hsa-mir-101-2	47	66	F	2	28	22	24	16	14	24	34	21.3333	20.6667	31.2042	1.50988	17.6132	1.17336	9	4850297	4850375	+	MI0000739
GTACTGTGATAACTGAA	17	hsa-mir-101-2	53	69	F	2	14	14	20	12	10	28	20	16.3333	19.3333	18.3554	0.949417	10.6747	1.81114	9	4850297	4850375	+	MI0000739
AGTACTGTGATAACTGAAG	19	hsa-mir-101-2	52	70	F	2	6	18	10	18	10	20	10	13.6667	13.3333	9.1777	0.688327	11.2084	1.18958	9	4850297	4850375	+	MI0000739
AGTACTGTGATAACTGA	17	hsa-mir-101-2	52	68	F	2	12	4	14	8	12	10	4	10	12	3.67108	0.305923	6.4048	1.87359	9	4850297	4850375	+	MI0000739
GTACTGTGATAACTGA	16	hsa-mir-101-2	53	68	F	2	22	4	10	14	10	14	22	12.3333	11.3333	20.1909	1.78155	10.6747	1.0617	9	4850297	4850375	+	MI0000739
ACAGTACTGTGATAACT	17	hsa-mir-101-2	50	66	F	2	20	6	10	6	12	12	10	11	11.3333	9.1777	0.809797	8.53973	1.32713	9	4850297	4850375	+	MI0000739
AGTACTGTGATAACTGAA	18	hsa-mir-101-2	52	69	F	2	20	6	12	4	8	10	6	10	10	5.50662	0.550662	8.006	1.24906	9	4850297	4850375	+	MI0000739
GGTACAGTACTGTGATAACTG	21	hsa-mir-101-2	47	67	F	2	22	10	6	8	12	10	4	11.3333	9.33333	3.67108	0.39333	10.6747	0.874344	9	4850297	4850375	+	MI0000739
ACTGTGATAACTGAA	15	hsa-mir-101-2	55	69	F	2	6	4	2	16	4	22	4	9	9.33333	3.67108	0.39333	6.93853	1.34514	9	4850297	4850375	+	MI0000739
CAGTACTGTGATAACTGAAG	20	hsa-mir-101-2	51	70	F	2	10	6	8	18	6	10	4	9.66667	8	3.67108	0.458885	9.07347	0.881692	9	4850297	4850375	+	MI0000739
GTACTGTGATAACTGAAG	18	hsa-mir-101-2	53	70	F	2	4	22	14	6	4	6	16	9.33333	8	14.6843	1.83554	8.53973	0.936797	9	4850297	4850375	+	MI0000739
CAGTACTGTGATAACTGA	18	hsa-mir-101-2	51	68	F	2	16	4	4	2	14	4	8	7.33333	7.33333	7.34216	1.0012	5.87107	1.24906	9	4850297	4850375	+	MI0000739
GGTACAGTACTGTGATAACTGA	22	hsa-mir-101-2	47	68	F	2	14	8	4	8	6	6	2	7.66667	5.33333	1.83554	0.344164	8.006	0.666167	9	4850297	4850375	+	MI0000739
ACAGTACTGTGATAACTGAAGA	22	hsa-mir-101-2	50	71	F	1	3	3	6	5	4	6	0	4.5	5.33333	0	0	2.93553	1.81682	9	4850297	4850375	+	MI0000739
ACTGTGATAACTGAAG	16	hsa-mir-101-2	55	70	F	0	0	2	8	8	4	4	2	4.33333	5.33333	1.83554	0.344164	2.66867	1.9985	9	4850297	4850375	+	MI0000739
CAGTACTGTGATAACT	16	hsa-mir-101-2	51	66	F	2	16	4	2	0	4	8	12	5.66667	4.66667	11.0132	2.35998	5.33733	0.874344	9	4850297	4850375	+	MI0000739
TACTGTGATAACTGAA	16	hsa-mir-101-2	54	69	F	2	2	0	2	2	10	0	2	2.66667	4	1.83554	0.458885	1.06747	3.74719	9	4850297	4850375	+	MI0000739
GTACAGTACTGTGATAACTGAAGA	24	hsa-mir-101-2	48	71	F	1	6	1	5	2	2	4	2	3.33333	3.66667	1.83554	0.500602	2.4018	1.52663	9	4850297	4850375	+	MI0000739
ACAGTACTGTGATAAC	16	hsa-mir-101-2	50	65	F	2	6	0	0	14	2	8	4	5	3.33333	3.67108	1.10132	5.33733	0.624532	9	4850297	4850375	+	MI0000739
AGTACTGTGATAACT	15	hsa-mir-101-2	52	66	F	2	8	4	2	4	2	4	4	4	2.66667	3.67108	1.37665	4.26987	0.624532	9	4850297	4850375	+	MI0000739
TACTGTGATAACTGA	15	hsa-mir-101-2	54	68	F	2	2	8	4	0	0	4	0	3	2.66667	0	0	2.66867	0.999251	9	4850297	4850375	+	MI0000739
CAGTACTGTGATAACTGAAGA	21	hsa-mir-101-2	51	71	F	0	0	2	0	3	4	4	6	2.16667	2.66667	5.50662	2.06498	1.33433	1.9985	9	4850297	4850375	+	MI0000739
TACTGTGATAACTGAAG	17	hsa-mir-101-2	54	70	F	2	4	2	4	8	0	2	0	3.33333	2	0	0	3.73613	0.535313	9	4850297	4850375	+	MI0000739
AAGGTACAGTACTGTGATAACT	22	hsa-mir-101-2	45	66	F	2	4	2	0	4	4	2	6	2.66667	2	5.50662	2.75331	2.66867	0.749438	9	4850297	4850375	+	MI0000739
CAGTACTGTGATAACTG	17	hsa-mir-101-2	51	67	F	2	6	4	4	0	2	0	4	2.66667	2	3.67108	1.83554	2.66867	0.749438	9	4850297	4850375	+	MI0000739
CAGTACTGTGATAACTGAAGAA	22	hsa-mir-101-2	51	72	F	1	4	1	0	3	5	1	1	2.33333	2	0.91777	0.458885	2.13493	0.936797	9	4850297	4850375	+	MI0000739
GGTACAGTACTGTGATAACTGAA	23	hsa-mir-101-2	47	69	F	2	4	0	2	0	4	0	6	1.66667	2	5.50662	2.75331	1.06747	1.87359	9	4850297	4850375	+	MI0000739
TCGGTTATCATGGTACCGATGCT	23	hsa-mir-101-2	12	34	F	0	0	1	0	1	2	4	5	1.33333	2	4.58885	2.29442	0.533733	3.74719	9	4850297	4850375	+	MI0000739
AGTACTGTGATAACTG	16	hsa-mir-101-2	52	67	F	0	0	0	2	2	0	4	0	1.33333	2	0	0	0.533733	3.74719	9	4850297	4850375	+	MI0000739
ACAGTACTGTGATAACTG	18	hsa-mir-101-2	50	67	F	0	0	4	0	6	4	0	8	2.33333	1.33333	7.34216	5.50662	2.66867	0.499625	9	4850297	4850375	+	MI0000739
AGGTACAGTACTGTGATAACTGAA	24	hsa-mir-101-2	46	69	F	2	2	0	0	0	2	2	4	1	1.33333	3.67108	2.75331	0.533733	2.49813	9	4850297	4850375	+	MI0000739
CTGTGATAACTGAAG	15	hsa-mir-101-2	56	70	F	0	0	0	2	0	0	2	2	0.666667	1.33333	1.83554	1.37665	0	#DIV/0!	9	4850297	4850375	+	MI0000739
AGGTACAGTACTGTGATAACT	21	hsa-mir-101-2	46	66	F	2	8	6	2	0	0	0	16	2.66667	0.666667	14.6843	22.0265	3.73613	0.178438	9	4850297	4850375	+	MI0000739
CAGTACTGTGATAAC	15	hsa-mir-101-2	51	65	F	0	0	2	0	6	2	0	10	1.66667	0.666667	9.1777	13.7666	2.13493	0.312266	9	4850297	4850375	+	MI0000739
GGTACAGTACTGTGATAAC	19	hsa-mir-101-2	47	65	F	0	0	4	0	2	0	2	0	1.33333	0.666667	0	0	1.6012	0.416354	9	4850297	4850375	+	MI0000739
GTACTGTGATAACTG	15	hsa-mir-101-2	53	67	F	2	6	0	0	0	0	2	2	1.33333	0.666667	1.83554	2.75331	1.6012	0.416354	9	4850297	4850375	+	MI0000739
AAAGGTACAGTACTGTGATAACT	23	hsa-mir-101-2	44	66	F	0	0	2	2	2	0	0	2	1	0.666667	1.83554	2.75331	1.06747	0.624532	9	4850297	4850375	+	MI0000739
ACAGTACTGTGATAACTGAAGAA	23	hsa-mir-101-2	50	72	F	0	0	0	0	1	0	1	1	0.333333	0.333333	0.91777	2.75331	0.266867	1.24906	9	4850297	4850375	+	MI0000739
TATATCTGAAAGGTACAGTACTG	23	hsa-mir-101-2	36	58	F	0	0	0	0	0	1	0	0	0.166667	0.333333	0	0	0	#DIV/0!	9	4850297	4850375	+	MI0000739
TCGGTTATCATGGTACCGATG	21	hsa-mir-101-2	12	32	F	0	0	0	0	0	1	0	0	0.166667	0.333333	0	0	0	#DIV/0!	9	4850297	4850375	+	MI0000739
AGTACTGTGATAACTGAAGA	20	hsa-mir-101-2	52	71	F	0	0	0	1	0	0	0	0	0.166667	0.333333	0	0	0	#DIV/0!	9	4850297	4850375	+	MI0000739
ACTGTGATAACTGAAGA	17	hsa-mir-101-2	55	71	F	0	0	0	0	0	0	1	1	0.166667	0.333333	0.91777	2.75331	0	#DIV/0!	9	4850297	4850375	+	MI0000739
AAGGTACAGTACTGTGATAACTGAA	25	hsa-mir-101-2	45	69	F	2	2	0	0	2	0	0	2	0.666667	0	1.83554	#DIV/0!	1.06747	0	9	4850297	4850375	+	MI0000739
AAGGTACAGTACTGTGATAACTGA	24	hsa-mir-101-2	45	68	F	0	0	4	0	0	0	0	0	0.666667	0	0	#DIV/0!	1.06747	0	9	4850297	4850375	+	MI0000739
AAAGGTACAGTACTGTGATAACTGAA	26	hsa-mir-101-2	44	69	F	2	2	0	0	0	0	0	0	0.333333	0	0	#DIV/0!	0.533733	0	9	4850297	4850375	+	MI0000739
TGTATATCTGAAAGGTACAGTACTG	25	hsa-mir-101-2	34	58	F	0	0	2	0	0	0	0	0	0.333333	0	0	#DIV/0!	0.533733	0	9	4850297	4850375	+	MI0000739
AAAGGTACAGTACTGTGATAACTG	24	hsa-mir-101-2	44	67	F	0	0	2	0	0	0	0	0	0.333333	0	0	#DIV/0!	0.533733	0	9	4850297	4850375	+	MI0000739
AAGGTACAGTACTGTGATAACTG	23	hsa-mir-101-2	45	67	F	2	2	0	0	0	0	0	0	0.333333	0	0	#DIV/0!	0.533733	0	9	4850297	4850375	+	MI0000739
AGGTACAGTACTGTGATAACTG	22	hsa-mir-101-2	46	67	F	2	2	0	0	0	0	0	0	0.333333	0	0	#DIV/0!	0.533733	0	9	4850297	4850375	+	MI0000739
GTACTGTGATAACTGAAGA	19	hsa-mir-101-2	53	71	F	1	1	0	0	1	0	0	0	0.333333	0	0	#DIV/0!	0.533733	0	9	4850297	4850375	+	MI0000739
TACTGTGATAACTGAAGA	18	hsa-mir-101-2	54	71	F	1	1	0	0	0	0	0	0	0.166667	0	0	#DIV/0!	0.266867	0	9	4850297	4850375	+	MI0000739
CTGTGATAACTGAAGA	16	hsa-mir-101-2	56	71	F	1	1	0	0	0	0	0	0	0.166667	0	0	#DIV/0!	0.266867	0	9	4850297	4850375	+	MI0000739
AGGTACAGTACTGTGATAACTGA	23	hsa-mir-101-2	46	68	F	0	0	0	0	0	0	0	2	0	0	1.83554	#DIV/0!	0	#DIV/0!	9	4850297	4850375	+	MI0000739
CGGTTATCATGGTACCGATGCTG	23	hsa-mir-101-2	13	35	F	0	0	0	0	0	0	0	1	0	0	0.91777	#DIV/0!	0	#DIV/0!	9	4850297	4850375	+	MI0000739
CGGTTATCATGGTACCGATGCT	22	hsa-mir-101-2	13	34	F	0	0	0	0	0	0	0	1	0	0	0.91777	#DIV/0!	0	#DIV/0!	9	4850297	4850375	+	MI0000739
AGCAGCATTGTACAGGGCTATGA	23	hsa-mir-103a-1	48	70	F	4	292608	228176	263376	236364	254844	178108	297808	242246	232109	273319	1.17755	202058	1.14873	5	167987901	167987978	-	MI0000109
AGCAGCATTGTACAGGGCTATG	22	hsa-mir-103a-1	48	69	F	4	68256	50412	54008	51960	53728	50780	65640	54857.3	52838.7	60242.4	1.14012	45534.9	1.1604	5	167987901	167987978	-	MI0000109
AGCAGCATTGTACAGGGCTAT	21	hsa-mir-103a-1	48	68	F	5	46270	34735	41505	38535	36275	42940	54710	40043.3	40240	50211.2	1.24779	31901.2	1.26139	5	167987901	167987978	-	MI0000109
AGCAGCATTGTACAGGGCTA	20	hsa-mir-103a-1	48	67	F	5	21190	20620	23620	22055	17435	21810	26165	21121.7	20955	24013.5	1.14595	17043.4	1.22951	5	167987901	167987978	-	MI0000109
AGCAGCATTGTACAGGGCT	19	hsa-mir-103a-1	48	66	F	5	21655	14975	16135	15985	15250	22975	20125	17829.2	18120	18470.1	1.01932	14041.2	1.29049	5	167987901	167987978	-	MI0000109
AGCAGCATTGTACAGGGC	18	hsa-mir-103a-1	48	65	F	5	9170	7345	7015	7480	6605	7835	11390	7575	7151.67	10453.4	1.46167	6403.47	1.11684	5	167987901	167987978	-	MI0000109
AGCAGCATTGTACAGGGCTATGAA	24	hsa-mir-103a-1	48	71	F	2	2384	1422	1470	1478	1770	1052	2126	1596	1430.67	1951.18	1.36383	1410.12	1.01457	5	167987901	167987978	-	MI0000109
CAGCATTGTACAGGGCTATGA	21	hsa-mir-103a-1	50	70	F	4	880	720	772	824	624	724	972	757.333	706.667	892.072	1.26237	646.885	1.09242	5	167987901	167987978	-	MI0000109
AGCAGCATTGTACAGGG	17	hsa-mir-103a-1	48	64	F	5	360	260	200	290	290	270	530	278.333	253.333	486.418	1.92007	242.849	1.04317	5	167987901	167987978	-	MI0000109
ATTGTACAGGGCTATGA	17	hsa-mir-103a-1	54	70	F	4	80	104	140	100	108	164	132	116	137.333	121.146	0.882128	75.7901	1.81202	5	167987901	167987978	-	MI0000109
AGCAGCATTGTACAGG	16	hsa-mir-103a-1	48	63	F	5	50	90	50	55	80	65	155	65	65	142.254	2.18853	52.039	1.24906	5	167987901	167987978	-	MI0000109
CAGCATTGTACAGGGCTA	18	hsa-mir-103a-1	50	67	F	5	70	25	75	65	20	95	40	58.3333	63.3333	36.7108	0.579644	42.6987	1.48326	5	167987901	167987978	-	MI0000109
GCAGCATTGTACAGGGCTATGA	22	hsa-mir-103a-1	49	70	F	4	80	64	60	36	56	72	76	61.3333	62.6667	69.7505	1.11304	48.036	1.30458	5	167987901	167987978	-	MI0000109
TTGTACAGGGCTATGA	16	hsa-mir-103a-1	55	70	F	4	52	16	48	8	28	64	4	36	46.6667	3.67108	0.078666	20.2819	2.30091	5	167987901	167987978	-	MI0000109
AGCATTGTACAGGGCTATGA	20	hsa-mir-103a-1	51	70	F	4	60	52	48	16	44	40	56	43.3333	44	51.3951	1.16807	34.1589	1.2881	5	167987901	167987978	-	MI0000109
CAGCATTGTACAGGGCTATG	20	hsa-mir-103a-1	50	69	F	4	44	64	60	76	28	40	32	52	42.6667	29.3686	0.688327	49.1035	0.868914	5	167987901	167987978	-	MI0000109
TGTACAGGGCTATGA	15	hsa-mir-103a-1	56	70	F	4	12	16	64	20	16	48	12	29.3333	42.6667	11.0132	0.258123	12.8096	3.33084	5	167987901	167987978	-	MI0000109
CAGCATTGTACAGGGCTAT	19	hsa-mir-103a-1	50	68	F	5	20	25	25	20	35	30	30	25.8333	30	27.5331	0.91777	17.3463	1.72947	5	167987901	167987978	-	MI0000109
GCAGCATTGTACAGGGCTATG	21	hsa-mir-103a-1	49	69	F	4	28	24	28	56	32	24	24	32	28	22.0265	0.78666	28.8216	0.971494	5	167987901	167987978	-	MI0000109
CATTGTACAGGGCTATGA	18	hsa-mir-103a-1	53	70	F	4	20	16	24	4	24	36	12	20.6667	28	11.0132	0.39333	10.6747	2.62303	5	167987901	167987978	-	MI0000109
GCAGCATTGTACAGGGCTAT	20	hsa-mir-103a-1	49	68	F	5	10	10	40	20	10	20	25	18.3333	23.3333	22.9443	0.983325	10.6747	2.18586	5	167987901	167987978	-	MI0000109
GCATTGTACAGGGCTATGA	19	hsa-mir-103a-1	52	70	F	4	32	28	16	8	24	16	20	20.6667	18.6667	18.3554	0.983325	18.1469	1.02864	5	167987901	167987978	-	MI0000109
AGCAGCATTGTACAG	15	hsa-mir-103a-1	48	62	F	5	15	0	10	5	20	20	15	11.6667	16.6667	13.7665	0.825993	5.33733	3.12266	5	167987901	167987978	-	MI0000109
CAGCATTGTACAGGGCTATGAA	22	hsa-mir-103a-1	50	71	F	2	28	8	16	10	4	28	6	15.6667	16	5.50662	0.344164	12.2759	1.30337	5	167987901	167987978	-	MI0000109
AGCATTGTACAGGGCTATG	19	hsa-mir-103a-1	51	69	F	4	12	16	16	8	8	24	16	14	16	14.6843	0.91777	9.6072	1.66542	5	167987901	167987978	-	MI0000109
CAGCATTGTACAGGGC	16	hsa-mir-103a-1	50	65	F	0	0	10	20	20	10	15	15	12.5	15	13.7665	0.91777	8.006	1.87359	5	167987901	167987978	-	MI0000109
GCAGCATTGTACAGGGCT	18	hsa-mir-103a-1	49	66	F	5	25	5	20	20	5	10	0	14.1667	11.6667	0	0	13.3433	0.874344	5	167987901	167987978	-	MI0000109
ATTGTACAGGGCTAT	15	hsa-mir-103a-1	54	68	F	5	25	10	5	0	10	15	5	10.8333	10	4.58885	0.458885	9.34033	1.07063	5	167987901	167987978	-	MI0000109
AGCATTGTACAGGGCTAT	18	hsa-mir-103a-1	51	68	F	5	20	5	5	15	10	10	5	10.8333	8.33333	4.58885	0.550662	10.6747	0.780665	5	167987901	167987978	-	MI0000109
CAGCATTGTACAGGGCT	17	hsa-mir-103a-1	50	66	F	5	10	0	15	25	0	10	15	10	8.33333	13.7665	1.65199	9.34033	0.892188	5	167987901	167987978	-	MI0000109
ATTGTACAGGGCTATG	16	hsa-mir-103a-1	54	69	F	4	16	4	8	4	8	8	12	8	8	11.0132	1.37665	6.4048	1.24906	5	167987901	167987978	-	MI0000109
GCAGCATTGTACAGGGCTA	19	hsa-mir-103a-1	49	67	F	5	20	10	10	10	0	10	10	10	6.66667	9.1777	1.37665	10.6747	0.624532	5	167987901	167987978	-	MI0000109
GGCTTCTTTACAGTGCTGCCTTG	23	hsa-mir-103a-1	11	33	F	0	0	8	4	10	12	4	6	6.33333	6.66667	5.50662	0.825993	4.8036	1.38785	5	167987901	167987978	-	MI0000109
AAGCAGCATTGTACAGGGCTATG	23	hsa-mir-103a-1	47	69	F	4	12	4	8	0	8	4	4	6	6.66667	3.67108	0.550662	4.26987	1.56133	5	167987901	167987978	-	MI0000109
AAGCAGCATTGTACAGGGCTATGA	24	hsa-mir-103a-1	47	70	F	4	12	8	16	0	0	0	12	6	5.33333	11.0132	2.06498	5.33733	0.999251	5	167987901	167987978	-	MI0000109
AAGCAGCATTGTACAGGGCTAT	22	hsa-mir-103a-1	47	68	F	5	5	0	0	25	5	10	15	7.5	5	13.7665	2.75331	8.006	0.624532	5	167987901	167987978	-	MI0000109
GCAGCATTGTACAGGGC	17	hsa-mir-103a-1	49	65	F	5	5	0	0	5	5	10	5	4.16667	5	4.58885	0.91777	2.66867	1.87359	5	167987901	167987978	-	MI0000109
GCATTGTACAGGGCTAT	17	hsa-mir-103a-1	52	68	F	5	5	5	10	0	5	0	0	4.16667	5	0	0	2.66867	1.87359	5	167987901	167987978	-	MI0000109
GCATTGTACAGGGCTATG	18	hsa-mir-103a-1	52	69	F	4	4	0	0	0	0	12	4	2.66667	4	3.67108	0.91777	1.06747	3.74719	5	167987901	167987978	-	MI0000109
GGCTTCTTTACAGTGCTGCCTTGT	24	hsa-mir-103a-1	11	34	F	0	0	0	0	0	8	4	0	2	4	0	0	0	#DIV/0!	5	167987901	167987978	-	MI0000109
AGCATTGTACAGGGCTA	17	hsa-mir-103a-1	51	67	F	5	15	0	0	10	10	0	0	5.83333	3.33333	0	0	6.67167	0.499625	5	167987901	167987978	-	MI0000109
AAGCAGCATTGTACAGGGCT	20	hsa-mir-103a-1	47	66	F	5	10	0	0	0	5	5	0	3.33333	3.33333	0	0	2.66867	1.24906	5	167987901	167987978	-	MI0000109
GCATTGTACAGGGCT	15	hsa-mir-103a-1	52	66	F	0	0	0	5	10	0	5	0	3.33333	3.33333	0	0	2.66867	1.24906	5	167987901	167987978	-	MI0000109
AGCATTGTACAGGGCT	16	hsa-mir-103a-1	51	66	F	0	0	0	5	0	0	5	20	1.66667	3.33333	18.3554	5.50662	0	#DIV/0!	5	167987901	167987978	-	MI0000109
CATTGTACAGGGCTA	15	hsa-mir-103a-1	53	67	F	0	0	0	0	0	0	10	0	1.66667	3.33333	0	0	0	#DIV/0!	5	167987901	167987978	-	MI0000109
AGCAGCATTGTACAGGGCTATGAAG	25	hsa-mir-103a-1	48	72	F	1	10	4	1	4	6	2	7	4.5	3	6.42439	2.14146	4.8036	0.624532	5	167987901	167987978	-	MI0000109
TTGTACAGGGCTATG	15	hsa-mir-103a-1	55	69	F	0	0	4	4	4	0	4	0	2.66667	2.66667	0	0	2.13493	1.24906	5	167987901	167987978	-	MI0000109
CTTTACAGTGCTGCC	15	hsa-mir-103a-1	16	30	F	0	0	0	0	0	0	8	0	1.33333	2.66667	0	0	0	#DIV/0!	5	167987901	167987978	-	MI0000109
GGCTTCTTTACAGTGCTGCCT	21	hsa-mir-103a-1	11	31	F	0	0	0	0	0	6	0	2	1	2	1.83554	0.91777	0	#DIV/0!	5	167987901	167987978	-	MI0000109
AGCATTGTACAGGGC	15	hsa-mir-103a-1	51	65	F	0	0	5	0	5	0	5	0	2.5	1.66667	0	0	2.66867	0.624532	5	167987901	167987978	-	MI0000109
CATTGTACAGGGCTATG	17	hsa-mir-103a-1	53	69	F	0	0	4	0	0	0	4	0	1.33333	1.33333	0	0	1.06747	1.24906	5	167987901	167987978	-	MI0000109
AGCATTGTACAGGGCTATGAA	21	hsa-mir-103a-1	51	71	F	0	0	2	2	0	2	0	2	1	1.33333	1.83554	1.37665	0.533733	2.49813	5	167987901	167987978	-	MI0000109
TCAAGCAGCATTGTACAGGGCTATG	25	hsa-mir-103a-1	45	69	F	0	0	0	4	0	0	0	0	0.666667	1.33333	0	0	0	#DIV/0!	5	167987901	167987978	-	MI0000109
GGCTTCTTTACAGTGCTG	18	hsa-mir-103a-1	11	28	F	0	0	0	4	0	0	0	0	0.666667	1.33333	0	0	0	#DIV/0!	5	167987901	167987978	-	MI0000109
TCTTTACAGTGCTGCC	16	hsa-mir-103a-1	15	30	F	0	0	0	0	0	0	4	0	0.666667	1.33333	0	0	0	#DIV/0!	5	167987901	167987978	-	MI0000109
TTTACAGTGCTGCCT	15	hsa-mir-103a-1	17	31	F	0	0	0	4	0	0	0	0	0.666667	1.33333	0	0	0	#DIV/0!	5	167987901	167987978	-	MI0000109
GGCTTCTTTACAGTGCTGCCTT	22	hsa-mir-103a-1	11	32	F	0	0	0	0	0	0	2	0	0.333333	0.666667	0	0	0	#DIV/0!	5	167987901	167987978	-	MI0000109
GCATTGTACAGGGCTA	16	hsa-mir-103a-1	52	67	F	5	5	0	0	10	0	0	0	2.5	0	0	#DIV/0!	4.003	0	5	167987901	167987978	-	MI0000109
TCTTTACAGTGCTGCCT	17	hsa-mir-103a-1	15	31	F	4	4	4	0	4	0	0	0	2	0	0	#DIV/0!	3.2024	0	5	167987901	167987978	-	MI0000109
ATTGTACAGGGCTATGAA	18	hsa-mir-103a-1	54	71	F	2	4	0	0	2	0	0	0	1	0	0	#DIV/0!	1.6012	0	5	167987901	167987978	-	MI0000109
AAGCAGCATTGTACAGGGC	19	hsa-mir-103a-1	47	65	F	0	0	0	0	5	0	0	0	0.833333	0	0	#DIV/0!	1.33433	0	5	167987901	167987978	-	MI0000109
CAAGCAGCATTGTACAGGGCTATG	24	hsa-mir-103a-1	46	69	F	0	0	0	0	4	0	0	0	0.666667	0	0	#DIV/0!	1.06747	0	5	167987901	167987978	-	MI0000109
CTTTACAGTGCTGCCT	16	hsa-mir-103a-1	16	31	F	0	0	0	0	4	0	0	0	0.666667	0	0	#DIV/0!	1.06747	0	5	167987901	167987978	-	MI0000109
TTACAGTGCTGCCTTG	16	hsa-mir-103a-1	18	33	F	4	4	0	0	0	0	0	0	0.666667	0	0	#DIV/0!	1.06747	0	5	167987901	167987978	-	MI0000109
GCAGCATTGTACAGGGCTATGAA	23	hsa-mir-103a-1	49	71	F	2	2	0	0	0	0	0	0	0.333333	0	0	#DIV/0!	0.533733	0	5	167987901	167987978	-	MI0000109
CTTTACAGTGCTGCCTTGTTGC	22	hsa-mir-103a-1	16	37	F	0	0	2	0	0	0	0	0	0.333333	0	0	#DIV/0!	0.533733	0	5	167987901	167987978	-	MI0000109
GCATTGTACAGGGCTATGAA	20	hsa-mir-103a-1	52	71	F	0	0	2	0	0	0	0	0	0.333333	0	0	#DIV/0!	0.533733	0	5	167987901	167987978	-	MI0000109
GGCTTCTTTACAGTGCTGCC	20	hsa-mir-103a-1	11	30	F	2	2	0	0	0	0	0	0	0.333333	0	0	#DIV/0!	0.533733	0	5	167987901	167987978	-	MI0000109
AAGCAGCATTGTACAGGGCTA	21	hsa-mir-103a-1	47	67	F	0	0	0	0	0	0	0	5	0	0	4.58885	#DIV/0!	0	#DIV/0!	5	167987901	167987978	-	MI0000109
CTTCTTTACAGTGCTGCCTTG	21	hsa-mir-103a-1	13	33	F	0	0	0	0	0	0	0	4	0	0	3.67108	#DIV/0!	0	#DIV/0!	5	167987901	167987978	-	MI0000109
CTTCTTTACAGTGCTGCCT	19	hsa-mir-103a-1	13	31	F	0	0	0	0	0	0	0	8	0	0	7.34216	#DIV/0!	0	#DIV/0!	5	167987901	167987978	-	MI0000109
CATTGTACAGGGCTAT	16	hsa-mir-103a-1	53	68	F	0	0	0	0	0	0	0	5	0	0	4.58885	#DIV/0!	0	#DIV/0!	5	167987901	167987978	-	MI0000109
CAGCATTGTACAGGG	15	hsa-mir-103a-1	50	64	F	0	0	0	0	0	0	0	15	0	0	13.7665	#DIV/0!	0	#DIV/0!	5	167987901	167987978	-	MI0000109
AGCAGCATTGTACAGGGCTATGA	23	hsa-mir-103a-2	48	70	F	4	292608	228176	263376	236364	254844	178108	297808	242246	232109	273319	1.17755	202058	1.14873	20	3898141	3898218	+	MI0000108
AGCAGCATTGTACAGGGCTATG	22	hsa-mir-103a-2	48	69	F	4	68256	50412	54008	51960	53728	50780	65640	54857.3	52838.7	60242.4	1.14012	45534.9	1.1604	20	3898141	3898218	+	MI0000108
AGCAGCATTGTACAGGGCTAT	21	hsa-mir-103a-2	48	68	F	5	46270	34735	41505	38535	36275	42940	54710	40043.3	40240	50211.2	1.24779	31901.2	1.26139	20	3898141	3898218	+	MI0000108
AGCAGCATTGTACAGGGCTA	20	hsa-mir-103a-2	48	67	F	5	21190	20620	23620	22055	17435	21810	26165	21121.7	20955	24013.5	1.14595	17043.4	1.22951	20	3898141	3898218	+	MI0000108
AGCAGCATTGTACAGGGCT	19	hsa-mir-103a-2	48	66	F	5	21655	14975	16135	15985	15250	22975	20125	17829.2	18120	18470.1	1.01932	14041.2	1.29049	20	3898141	3898218	+	MI0000108
AGCAGCATTGTACAGGGC	18	hsa-mir-103a-2	48	65	F	5	9170	7345	7015	7480	6605	7835	11390	7575	7151.67	10453.4	1.46167	6403.47	1.11684	20	3898141	3898218	+	MI0000108
AGCAGCATTGTACAGGGCTATGAA	24	hsa-mir-103a-2	48	71	F	2	2384	1422	1470	1478	1770	1052	2126	1596	1430.67	1951.18	1.36383	1410.12	1.01457	20	3898141	3898218	+	MI0000108
CAGCATTGTACAGGGCTATGA	21	hsa-mir-103a-2	50	70	F	4	880	720	772	824	624	724	972	757.333	706.667	892.072	1.26237	646.885	1.09242	20	3898141	3898218	+	MI0000108
AGCAGCATTGTACAGGG	17	hsa-mir-103a-2	48	64	F	5	360	260	200	290	290	270	530	278.333	253.333	486.418	1.92007	242.849	1.04317	20	3898141	3898218	+	MI0000108
ATTGTACAGGGCTATGA	17	hsa-mir-103a-2	54	70	F	4	80	104	140	100	108	164	132	116	137.333	121.146	0.882128	75.7901	1.81202	20	3898141	3898218	+	MI0000108
AGCAGCATTGTACAGGGCTATGAAA	25	hsa-mir-103a-2	48	72	F	1	179	153	142	151	181	78	211	147.333	133.667	193.649	1.44875	128.897	1.03701	20	3898141	3898218	+	MI0000108
AGCAGCATTGTACAGG	16	hsa-mir-103a-2	48	63	F	5	50	90	50	55	80	65	155	65	65	142.254	2.18853	52.039	1.24906	20	3898141	3898218	+	MI0000108
CAGCATTGTACAGGGCTA	18	hsa-mir-103a-2	50	67	F	5	70	25	75	65	20	95	40	58.3333	63.3333	36.7108	0.579644	42.6987	1.48326	20	3898141	3898218	+	MI0000108
GCAGCATTGTACAGGGCTATGA	22	hsa-mir-103a-2	49	70	F	4	80	64	60	36	56	72	76	61.3333	62.6667	69.7505	1.11304	48.036	1.30458	20	3898141	3898218	+	MI0000108
AGCTTCTTTACAGTGCTGCCTTG	23	hsa-mir-103a-2	11	33	F	2	62	66	44	42	62	44	110	53.3333	50	100.955	2.01909	45.3673	1.10211	20	3898141	3898218	+	MI0000108
TTGTACAGGGCTATGA	16	hsa-mir-103a-2	55	70	F	4	52	16	48	8	28	64	4	36	46.6667	3.67108	0.078666	20.2819	2.30091	20	3898141	3898218	+	MI0000108
AGCTTCTTTACAGTGCTGCCTTGT	24	hsa-mir-103a-2	11	34	F	2	28	18	44	48	52	42	88	38.6667	46	80.7638	1.75573	25.0855	1.83373	20	3898141	3898218	+	MI0000108
AGCATTGTACAGGGCTATGA	20	hsa-mir-103a-2	51	70	F	4	60	52	48	16	44	40	56	43.3333	44	51.3951	1.16807	34.1589	1.2881	20	3898141	3898218	+	MI0000108
CAGCATTGTACAGGGCTATG	20	hsa-mir-103a-2	50	69	F	4	44	64	60	76	28	40	32	52	42.6667	29.3686	0.688327	49.1035	0.868914	20	3898141	3898218	+	MI0000108
TGTACAGGGCTATGA	15	hsa-mir-103a-2	56	70	F	4	12	16	64	20	16	48	12	29.3333	42.6667	11.0132	0.258123	12.8096	3.33084	20	3898141	3898218	+	MI0000108
CAGCATTGTACAGGGCTAT	19	hsa-mir-103a-2	50	68	F	5	20	25	25	20	35	30	30	25.8333	30	27.5331	0.91777	17.3463	1.72947	20	3898141	3898218	+	MI0000108
GCAGCATTGTACAGGGCTATG	21	hsa-mir-103a-2	49	69	F	4	28	24	28	56	32	24	24	32	28	22.0265	0.78666	28.8216	0.971494	20	3898141	3898218	+	MI0000108
CATTGTACAGGGCTATGA	18	hsa-mir-103a-2	53	70	F	4	20	16	24	4	24	36	12	20.6667	28	11.0132	0.39333	10.6747	2.62303	20	3898141	3898218	+	MI0000108
GCAGCATTGTACAGGGCTAT	20	hsa-mir-103a-2	49	68	F	5	10	10	40	20	10	20	25	18.3333	23.3333	22.9443	0.983325	10.6747	2.18586	20	3898141	3898218	+	MI0000108
GCATTGTACAGGGCTATGA	19	hsa-mir-103a-2	52	70	F	4	32	28	16	8	24	16	20	20.6667	18.6667	18.3554	0.983325	18.1469	1.02864	20	3898141	3898218	+	MI0000108
AGCAGCATTGTACAG	15	hsa-mir-103a-2	48	62	F	5	15	0	10	5	20	20	15	11.6667	16.6667	13.7665	0.825993	5.33733	3.12266	20	3898141	3898218	+	MI0000108
CAGCATTGTACAGGGCTATGAA	22	hsa-mir-103a-2	50	71	F	2	28	8	16	10	4	28	6	15.6667	16	5.50662	0.344164	12.2759	1.30337	20	3898141	3898218	+	MI0000108
AGCATTGTACAGGGCTATG	19	hsa-mir-103a-2	51	69	F	4	12	16	16	8	8	24	16	14	16	14.6843	0.91777	9.6072	1.66542	20	3898141	3898218	+	MI0000108
CAGCATTGTACAGGGC	16	hsa-mir-103a-2	50	65	F	0	0	10	20	20	10	15	15	12.5	15	13.7665	0.91777	8.006	1.87359	20	3898141	3898218	+	MI0000108
GCAGCATTGTACAGGGCT	18	hsa-mir-103a-2	49	66	F	5	25	5	20	20	5	10	0	14.1667	11.6667	0	0	13.3433	0.874344	20	3898141	3898218	+	MI0000108
ATTGTACAGGGCTAT	15	hsa-mir-103a-2	54	68	F	5	25	10	5	0	10	15	5	10.8333	10	4.58885	0.458885	9.34033	1.07063	20	3898141	3898218	+	MI0000108
AGCATTGTACAGGGCTAT	18	hsa-mir-103a-2	51	68	F	5	20	5	5	15	10	10	5	10.8333	8.33333	4.58885	0.550662	10.6747	0.780665	20	3898141	3898218	+	MI0000108
CAGCATTGTACAGGGCT	17	hsa-mir-103a-2	50	66	F	5	10	0	15	25	0	10	15	10	8.33333	13.7665	1.65199	9.34033	0.892188	20	3898141	3898218	+	MI0000108
ATTGTACAGGGCTATG	16	hsa-mir-103a-2	54	69	F	4	16	4	8	4	8	8	12	8	8	11.0132	1.37665	6.4048	1.24906	20	3898141	3898218	+	MI0000108
GCAGCATTGTACAGGGCTA	19	hsa-mir-103a-2	49	67	F	5	20	10	10	10	0	10	10	10	6.66667	9.1777	1.37665	10.6747	0.624532	20	3898141	3898218	+	MI0000108
AAGCAGCATTGTACAGGGCTATG	23	hsa-mir-103a-2	47	69	F	4	12	4	8	0	8	4	4	6	6.66667	3.67108	0.550662	4.26987	1.56133	20	3898141	3898218	+	MI0000108
AAGCAGCATTGTACAGGGCTATGA	24	hsa-mir-103a-2	47	70	F	4	12	8	16	0	0	0	12	6	5.33333	11.0132	2.06498	5.33733	0.999251	20	3898141	3898218	+	MI0000108
AAGCAGCATTGTACAGGGCTAT	22	hsa-mir-103a-2	47	68	F	5	5	0	0	25	5	10	15	7.5	5	13.7665	2.75331	8.006	0.624532	20	3898141	3898218	+	MI0000108
GCAGCATTGTACAGGGC	17	hsa-mir-103a-2	49	65	F	5	5	0	0	5	5	10	5	4.16667	5	4.58885	0.91777	2.66867	1.87359	20	3898141	3898218	+	MI0000108
GCATTGTACAGGGCTAT	17	hsa-mir-103a-2	52	68	F	5	5	5	10	0	5	0	0	4.16667	5	0	0	2.66867	1.87359	20	3898141	3898218	+	MI0000108
GCATTGTACAGGGCTATG	18	hsa-mir-103a-2	52	69	F	4	4	0	0	0	0	12	4	2.66667	4	3.67108	0.91777	1.06747	3.74719	20	3898141	3898218	+	MI0000108
AGCATTGTACAGGGCTA	17	hsa-mir-103a-2	51	67	F	5	15	0	0	10	10	0	0	5.83333	3.33333	0	0	6.67167	0.499625	20	3898141	3898218	+	MI0000108
AAGCAGCATTGTACAGGGCT	20	hsa-mir-103a-2	47	66	F	5	10	0	0	0	5	5	0	3.33333	3.33333	0	0	2.66867	1.24906	20	3898141	3898218	+	MI0000108
GCATTGTACAGGGCT	15	hsa-mir-103a-2	52	66	F	0	0	0	5	10	0	5	0	3.33333	3.33333	0	0	2.66867	1.24906	20	3898141	3898218	+	MI0000108
AGCATTGTACAGGGCT	16	hsa-mir-103a-2	51	66	F	0	0	0	5	0	0	5	20	1.66667	3.33333	18.3554	5.50662	0	#DIV/0!	20	3898141	3898218	+	MI0000108
CATTGTACAGGGCTA	15	hsa-mir-103a-2	53	67	F	0	0	0	0	0	0	10	0	1.66667	3.33333	0	0	0	#DIV/0!	20	3898141	3898218	+	MI0000108
AGCTTCTTTACAGTGCTGCCTT	22	hsa-mir-103a-2	11	32	F	0	0	10	0	6	0	8	6	4	2.66667	5.50662	2.06498	4.26987	0.624532	20	3898141	3898218	+	MI0000108
CAGCATTGTACAGGGCTATGAAA	23	hsa-mir-103a-2	50	72	F	1	3	4	4	3	3	1	3	3	2.66667	2.75331	1.03249	2.66867	0.999251	20	3898141	3898218	+	MI0000108
TTGTACAGGGCTATG	15	hsa-mir-103a-2	55	69	F	0	0	4	4	4	0	4	0	2.66667	2.66667	0	0	2.13493	1.24906	20	3898141	3898218	+	MI0000108
CTTTACAGTGCTGCC	15	hsa-mir-103a-2	16	30	F	0	0	0	0	0	0	8	0	1.33333	2.66667	0	0	0	#DIV/0!	20	3898141	3898218	+	MI0000108
AGCATTGTACAGGGC	15	hsa-mir-103a-2	51	65	F	0	0	5	0	5	0	5	0	2.5	1.66667	0	0	2.66867	0.624532	20	3898141	3898218	+	MI0000108
AGGTCAAGCAGCATTGTACAGGGCT	25	hsa-mir-103a-2	42	66	F	2	4	0	0	0	2	2	0	1.33333	1.33333	0	0	1.06747	1.24906	20	3898141	3898218	+	MI0000108
CATTGTACAGGGCTATG	17	hsa-mir-103a-2	53	69	F	0	0	4	0	0	0	4	0	1.33333	1.33333	0	0	1.06747	1.24906	20	3898141	3898218	+	MI0000108
AGCATTGTACAGGGCTATGAA	21	hsa-mir-103a-2	51	71	F	0	0	2	2	0	2	0	2	1	1.33333	1.83554	1.37665	0.533733	2.49813	20	3898141	3898218	+	MI0000108
AGCTTCTTTACAGTGCTGCC	20	hsa-mir-103a-2	11	30	F	2	2	0	4	0	0	0	0	1	1.33333	0	0	0.533733	2.49813	20	3898141	3898218	+	MI0000108
TCAAGCAGCATTGTACAGGGCTATG	25	hsa-mir-103a-2	45	69	F	0	0	0	4	0	0	0	0	0.666667	1.33333	0	0	0	#DIV/0!	20	3898141	3898218	+	MI0000108
TCTTTACAGTGCTGCC	16	hsa-mir-103a-2	15	30	F	0	0	0	0	0	0	4	0	0.666667	1.33333	0	0	0	#DIV/0!	20	3898141	3898218	+	MI0000108
TTTACAGTGCTGCCT	15	hsa-mir-103a-2	17	31	F	0	0	0	4	0	0	0	0	0.666667	1.33333	0	0	0	#DIV/0!	20	3898141	3898218	+	MI0000108
AGCTTCTTTACAGTGCTGCCT	21	hsa-mir-103a-2	11	31	F	2	4	2	2	8	0	0	10	2.66667	0.666667	9.1777	13.7666	3.73613	0.178438	20	3898141	3898218	+	MI0000108
AGCTTCTTTACAGTGCTG	18	hsa-mir-103a-2	11	28	F	0	0	0	0	2	0	2	0	0.666667	0.666667	0	0	0.533733	1.24906	20	3898141	3898218	+	MI0000108
GTCAAGCAGCATTGTACAGGGCTATGA	27	hsa-mir-103a-2	44	70	F	0	0	0	2	0	0	0	0	0.333333	0.666667	0	0	0	#DIV/0!	20	3898141	3898218	+	MI0000108
AGCATTGTACAGGGCTATGAAA	22	hsa-mir-103a-2	51	72	F	1	1	1	0	0	1	0	0	0.5	0.333333	0	0	0.533733	0.624532	20	3898141	3898218	+	MI0000108
GTACAGGGCTATGAAA	16	hsa-mir-103a-2	57	72	F	0	0	0	0	0	0	1	0	0.166667	0.333333	0	0	0	#DIV/0!	20	3898141	3898218	+	MI0000108
GCATTGTACAGGGCTA	16	hsa-mir-103a-2	52	67	F	5	5	0	0	10	0	0	0	2.5	0	0	#DIV/0!	4.003	0	20	3898141	3898218	+	MI0000108
TCTTTACAGTGCTGCCT	17	hsa-mir-103a-2	15	31	F	4	4	4	0	4	0	0	0	2	0	0	#DIV/0!	3.2024	0	20	3898141	3898218	+	MI0000108
ATTGTACAGGGCTATGAA	18	hsa-mir-103a-2	54	71	F	2	4	0	0	2	0	0	0	1	0	0	#DIV/0!	1.6012	0	20	3898141	3898218	+	MI0000108
AAGCAGCATTGTACAGGGC	19	hsa-mir-103a-2	47	65	F	0	0	0	0	5	0	0	0	0.833333	0	0	#DIV/0!	1.33433	0	20	3898141	3898218	+	MI0000108
CAAGCAGCATTGTACAGGGCTATG	24	hsa-mir-103a-2	46	69	F	0	0	0	0	4	0	0	0	0.666667	0	0	#DIV/0!	1.06747	0	20	3898141	3898218	+	MI0000108
CTTTACAGTGCTGCCT	16	hsa-mir-103a-2	16	31	F	0	0	0	0	4	0	0	0	0.666667	0	0	#DIV/0!	1.06747	0	20	3898141	3898218	+	MI0000108
TTACAGTGCTGCCTTG	16	hsa-mir-103a-2	18	33	F	4	4	0	0	0	0	0	0	0.666667	0	0	#DIV/0!	1.06747	0	20	3898141	3898218	+	MI0000108
TTGTAGCATTCAGGTCAAGCAGCATTG	27	hsa-mir-103a-2	31	57	F	2	2	0	0	0	0	0	0	0.333333	0	0	#DIV/0!	0.533733	0	20	3898141	3898218	+	MI0000108
GCAGCATTGTACAGGGCTATGAA	23	hsa-mir-103a-2	49	71	F	2	2	0	0	0	0	0	0	0.333333	0	0	#DIV/0!	0.533733	0	20	3898141	3898218	+	MI0000108
GGTCAAGCAGCATTGTACAGGGC	23	hsa-mir-103a-2	43	65	F	0	0	0	0	2	0	0	0	0.333333	0	0	#DIV/0!	0.533733	0	20	3898141	3898218	+	MI0000108
GCATTGTACAGGGCTATGAA	20	hsa-mir-103a-2	52	71	F	0	0	2	0	0	0	0	0	0.333333	0	0	#DIV/0!	0.533733	0	20	3898141	3898218	+	MI0000108
ATTGTACAGGGCTATGAAA	19	hsa-mir-103a-2	54	72	F	0	0	1	0	0	0	0	0	0.166667	0	0	#DIV/0!	0.266867	0	20	3898141	3898218	+	MI0000108
ATTCAGGTCAAGCAGCATTGTACAGGGCTATGA	33	hsa-mir-103a-2	38	70	F	0	0	0	0	0	0	0	2	0	0	1.83554	#DIV/0!	0	#DIV/0!	20	3898141	3898218	+	MI0000108
AGGTCAAGCAGCATTGTACAGGGC	24	hsa-mir-103a-2	42	65	F	0	0	0	0	0	0	0	2	0	0	1.83554	#DIV/0!	0	#DIV/0!	20	3898141	3898218	+	MI0000108
TTCAGGTCAAGCAGCATTGTACA	23	hsa-mir-103a-2	39	61	F	0	0	0	0	0	0	0	2	0	0	1.83554	#DIV/0!	0	#DIV/0!	20	3898141	3898218	+	MI0000108
AAGCAGCATTGTACAGGGCTA	21	hsa-mir-103a-2	47	67	F	0	0	0	0	0	0	0	5	0	0	4.58885	#DIV/0!	0	#DIV/0!	20	3898141	3898218	+	MI0000108
CTTCTTTACAGTGCTGCCTTG	21	hsa-mir-103a-2	13	33	F	0	0	0	0	0	0	0	4	0	0	3.67108	#DIV/0!	0	#DIV/0!	20	3898141	3898218	+	MI0000108
CTTCTTTACAGTGCTGCCT	19	hsa-mir-103a-2	13	31	F	0	0	0	0	0	0	0	8	0	0	7.34216	#DIV/0!	0	#DIV/0!	20	3898141	3898218	+	MI0000108
CATTGTACAGGGCTAT	16	hsa-mir-103a-2	53	68	F	0	0	0	0	0	0	0	5	0	0	4.58885	#DIV/0!	0	#DIV/0!	20	3898141	3898218	+	MI0000108
CAGCATTGTACAGGG	15	hsa-mir-103a-2	50	64	F	0	0	0	0	0	0	0	15	0	0	13.7665	#DIV/0!	0	#DIV/0!	20	3898141	3898218	+	MI0000108
AGCAGCATTGTACAGGGCTATGA	23	hsa-mir-103b-1	1	23	R	4	292608	228176	263376	236364	254844	178108	297808	242246	232109	273319	1.17755	202058	1.14873	5	167987909	167987970	+	MI0007261
AGCAGCATTGTACAGGGCTATG	22	hsa-mir-103b-1	2	23	R	4	68256	50412	54008	51960	53728	50780	65640	54857.3	52838.7	60242.4	1.14012	45534.9	1.1604	5	167987909	167987970	+	MI0007261
AGCAGCATTGTACAGGGCTAT	21	hsa-mir-103b-1	3	23	R	5	46270	34735	41505	38535	36275	42940	54710	40043.3	40240	50211.2	1.24779	31901.2	1.26139	5	167987909	167987970	+	MI0007261
AGCAGCATTGTACAGGGCTA	20	hsa-mir-103b-1	4	23	R	5	21190	20620	23620	22055	17435	21810	26165	21121.7	20955	24013.5	1.14595	17043.4	1.22951	5	167987909	167987970	+	MI0007261
AGCAGCATTGTACAGGGCT	19	hsa-mir-103b-1	5	23	R	5	21655	14975	16135	15985	15250	22975	20125	17829.2	18120	18470.1	1.01932	14041.2	1.29049	5	167987909	167987970	+	MI0007261
AGCAGCATTGTACAGGGC	18	hsa-mir-103b-1	6	23	R	5	9170	7345	7015	7480	6605	7835	11390	7575	7151.67	10453.4	1.46167	6403.47	1.11684	5	167987909	167987970	+	MI0007261
CAGCATTGTACAGGGCTATGA	21	hsa-mir-103b-1	1	21	R	4	880	720	772	824	624	724	972	757.333	706.667	892.072	1.26237	646.885	1.09242	5	167987909	167987970	+	MI0007261
AGCAGCATTGTACAGGG	17	hsa-mir-103b-1	7	23	R	5	360	260	200	290	290	270	530	278.333	253.333	486.418	1.92007	242.849	1.04317	5	167987909	167987970	+	MI0007261
ATTGTACAGGGCTATGA	17	hsa-mir-103b-1	1	17	R	4	80	104	140	100	108	164	132	116	137.333	121.146	0.882128	75.7901	1.81202	5	167987909	167987970	+	MI0007261
AGCAGCATTGTACAGG	16	hsa-mir-103b-1	8	23	R	5	50	90	50	55	80	65	155	65	65	142.254	2.18853	52.039	1.24906	5	167987909	167987970	+	MI0007261
CAGCATTGTACAGGGCTA	18	hsa-mir-103b-1	4	21	R	5	70	25	75	65	20	95	40	58.3333	63.3333	36.7108	0.579644	42.6987	1.48326	5	167987909	167987970	+	MI0007261
GCAGCATTGTACAGGGCTATGA	22	hsa-mir-103b-1	1	22	R	4	80	64	60	36	56	72	76	61.3333	62.6667	69.7505	1.11304	48.036	1.30458	5	167987909	167987970	+	MI0007261
TTGTACAGGGCTATGA	16	hsa-mir-103b-1	1	16	R	4	52	16	48	8	28	64	4	36	46.6667	3.67108	0.078666	20.2819	2.30091	5	167987909	167987970	+	MI0007261
AGCATTGTACAGGGCTATGA	20	hsa-mir-103b-1	1	20	R	4	60	52	48	16	44	40	56	43.3333	44	51.3951	1.16807	34.1589	1.2881	5	167987909	167987970	+	MI0007261
CAGCATTGTACAGGGCTATG	20	hsa-mir-103b-1	2	21	R	4	44	64	60	76	28	40	32	52	42.6667	29.3686	0.688327	49.1035	0.868914	5	167987909	167987970	+	MI0007261
TGTACAGGGCTATGA	15	hsa-mir-103b-1	1	15	R	4	12	16	64	20	16	48	12	29.3333	42.6667	11.0132	0.258123	12.8096	3.33084	5	167987909	167987970	+	MI0007261
CAGCATTGTACAGGGCTAT	19	hsa-mir-103b-1	3	21	R	5	20	25	25	20	35	30	30	25.8333	30	27.5331	0.91777	17.3463	1.72947	5	167987909	167987970	+	MI0007261
GCAGCATTGTACAGGGCTATG	21	hsa-mir-103b-1	2	22	R	4	28	24	28	56	32	24	24	32	28	22.0265	0.78666	28.8216	0.971494	5	167987909	167987970	+	MI0007261
CATTGTACAGGGCTATGA	18	hsa-mir-103b-1	1	18	R	4	20	16	24	4	24	36	12	20.6667	28	11.0132	0.39333	10.6747	2.62303	5	167987909	167987970	+	MI0007261
GCAGCATTGTACAGGGCTAT	20	hsa-mir-103b-1	3	22	R	5	10	10	40	20	10	20	25	18.3333	23.3333	22.9443	0.983325	10.6747	2.18586	5	167987909	167987970	+	MI0007261
GCATTGTACAGGGCTATGA	19	hsa-mir-103b-1	1	19	R	4	32	28	16	8	24	16	20	20.6667	18.6667	18.3554	0.983325	18.1469	1.02864	5	167987909	167987970	+	MI0007261
AGCAGCATTGTACAG	15	hsa-mir-103b-1	9	23	R	5	15	0	10	5	20	20	15	11.6667	16.6667	13.7665	0.825993	5.33733	3.12266	5	167987909	167987970	+	MI0007261
AGCATTGTACAGGGCTATG	19	hsa-mir-103b-1	2	20	R	4	12	16	16	8	8	24	16	14	16	14.6843	0.91777	9.6072	1.66542	5	167987909	167987970	+	MI0007261
CAGCATTGTACAGGGC	16	hsa-mir-103b-1	6	21	R	0	0	10	20	20	10	15	15	12.5	15	13.7665	0.91777	8.006	1.87359	5	167987909	167987970	+	MI0007261
GCAGCATTGTACAGGGCT	18	hsa-mir-103b-1	5	22	R	5	25	5	20	20	5	10	0	14.1667	11.6667	0	0	13.3433	0.874344	5	167987909	167987970	+	MI0007261
ATTGTACAGGGCTAT	15	hsa-mir-103b-1	3	17	R	5	25	10	5	0	10	15	5	10.8333	10	4.58885	0.458885	9.34033	1.07063	5	167987909	167987970	+	MI0007261
AGCATTGTACAGGGCTAT	18	hsa-mir-103b-1	3	20	R	5	20	5	5	15	10	10	5	10.8333	8.33333	4.58885	0.550662	10.6747	0.780665	5	167987909	167987970	+	MI0007261
CAGCATTGTACAGGGCT	17	hsa-mir-103b-1	5	21	R	5	10	0	15	25	0	10	15	10	8.33333	13.7665	1.65199	9.34033	0.892188	5	167987909	167987970	+	MI0007261
ATTGTACAGGGCTATG	16	hsa-mir-103b-1	2	17	R	4	16	4	8	4	8	8	12	8	8	11.0132	1.37665	6.4048	1.24906	5	167987909	167987970	+	MI0007261
GCAGCATTGTACAGGGCTA	19	hsa-mir-103b-1	4	22	R	5	20	10	10	10	0	10	10	10	6.66667	9.1777	1.37665	10.6747	0.624532	5	167987909	167987970	+	MI0007261
GGCTTCTTTACAGTGCTGCCTTG	23	hsa-mir-103b-1	38	60	R	0	0	8	4	10	12	4	6	6.33333	6.66667	5.50662	0.825993	4.8036	1.38785	5	167987909	167987970	+	MI0007261
AAGCAGCATTGTACAGGGCTATG	23	hsa-mir-103b-1	2	24	R	4	12	4	8	0	8	4	4	6	6.66667	3.67108	0.550662	4.26987	1.56133	5	167987909	167987970	+	MI0007261
AAGCAGCATTGTACAGGGCTATGA	24	hsa-mir-103b-1	1	24	R	4	12	8	16	0	0	0	12	6	5.33333	11.0132	2.06498	5.33733	0.999251	5	167987909	167987970	+	MI0007261
AAGCAGCATTGTACAGGGCTAT	22	hsa-mir-103b-1	3	24	R	5	5	0	0	25	5	10	15	7.5	5	13.7665	2.75331	8.006	0.624532	5	167987909	167987970	+	MI0007261
GCAGCATTGTACAGGGC	17	hsa-mir-103b-1	6	22	R	5	5	0	0	5	5	10	5	4.16667	5	4.58885	0.91777	2.66867	1.87359	5	167987909	167987970	+	MI0007261
GCATTGTACAGGGCTAT	17	hsa-mir-103b-1	3	19	R	5	5	5	10	0	5	0	0	4.16667	5	0	0	2.66867	1.87359	5	167987909	167987970	+	MI0007261
GCATTGTACAGGGCTATG	18	hsa-mir-103b-1	2	19	R	4	4	0	0	0	0	12	4	2.66667	4	3.67108	0.91777	1.06747	3.74719	5	167987909	167987970	+	MI0007261
GGCTTCTTTACAGTGCTGCCTTGT	24	hsa-mir-103b-1	37	60	R	0	0	0	0	0	8	4	0	2	4	0	0	0	#DIV/0!	5	167987909	167987970	+	MI0007261
AGCATTGTACAGGGCTA	17	hsa-mir-103b-1	4	20	R	5	15	0	0	10	10	0	0	5.83333	3.33333	0	0	6.67167	0.499625	5	167987909	167987970	+	MI0007261
AAGCAGCATTGTACAGGGCT	20	hsa-mir-103b-1	5	24	R	5	10	0	0	0	5	5	0	3.33333	3.33333	0	0	2.66867	1.24906	5	167987909	167987970	+	MI0007261
GCATTGTACAGGGCT	15	hsa-mir-103b-1	5	19	R	0	0	0	5	10	0	5	0	3.33333	3.33333	0	0	2.66867	1.24906	5	167987909	167987970	+	MI0007261
AGCATTGTACAGGGCT	16	hsa-mir-103b-1	5	20	R	0	0	0	5	0	0	5	20	1.66667	3.33333	18.3554	5.50662	0	#DIV/0!	5	167987909	167987970	+	MI0007261
CATTGTACAGGGCTA	15	hsa-mir-103b-1	4	18	R	0	0	0	0	0	0	10	0	1.66667	3.33333	0	0	0	#DIV/0!	5	167987909	167987970	+	MI0007261
TTGTACAGGGCTATG	15	hsa-mir-103b-1	2	16	R	0	0	4	4	4	0	4	0	2.66667	2.66667	0	0	2.13493	1.24906	5	167987909	167987970	+	MI0007261
CTTTACAGTGCTGCC	15	hsa-mir-103b-1	41	55	R	0	0	0	0	0	0	8	0	1.33333	2.66667	0	0	0	#DIV/0!	5	167987909	167987970	+	MI0007261
GGCTTCTTTACAGTGCTGCCT	21	hsa-mir-103b-1	40	60	R	0	0	0	0	0	6	0	2	1	2	1.83554	0.91777	0	#DIV/0!	5	167987909	167987970	+	MI0007261
AGCATTGTACAGGGC	15	hsa-mir-103b-1	6	20	R	0	0	5	0	5	0	5	0	2.5	1.66667	0	0	2.66867	0.624532	5	167987909	167987970	+	MI0007261
CATTGTACAGGGCTATG	17	hsa-mir-103b-1	2	18	R	0	0	4	0	0	0	4	0	1.33333	1.33333	0	0	1.06747	1.24906	5	167987909	167987970	+	MI0007261
TCAAGCAGCATTGTACAGGGCTATG	25	hsa-mir-103b-1	2	26	R	0	0	0	4	0	0	0	0	0.666667	1.33333	0	0	0	#DIV/0!	5	167987909	167987970	+	MI0007261
GGCTTCTTTACAGTGCTG	18	hsa-mir-103b-1	43	60	R	0	0	0	4	0	0	0	0	0.666667	1.33333	0	0	0	#DIV/0!	5	167987909	167987970	+	MI0007261
TCTTTACAGTGCTGCC	16	hsa-mir-103b-1	41	56	R	0	0	0	0	0	0	4	0	0.666667	1.33333	0	0	0	#DIV/0!	5	167987909	167987970	+	MI0007261
TTTACAGTGCTGCCT	15	hsa-mir-103b-1	40	54	R	0	0	0	4	0	0	0	0	0.666667	1.33333	0	0	0	#DIV/0!	5	167987909	167987970	+	MI0007261
GGCTTCTTTACAGTGCTGCCTT	22	hsa-mir-103b-1	39	60	R	0	0	0	0	0	0	2	0	0.333333	0.666667	0	0	0	#DIV/0!	5	167987909	167987970	+	MI0007261
GCATTGTACAGGGCTA	16	hsa-mir-103b-1	4	19	R	5	5	0	0	10	0	0	0	2.5	0	0	#DIV/0!	4.003	0	5	167987909	167987970	+	MI0007261
TCTTTACAGTGCTGCCT	17	hsa-mir-103b-1	40	56	R	4	4	4	0	4	0	0	0	2	0	0	#DIV/0!	3.2024	0	5	167987909	167987970	+	MI0007261
AAGCAGCATTGTACAGGGC	19	hsa-mir-103b-1	6	24	R	0	0	0	0	5	0	0	0	0.833333	0	0	#DIV/0!	1.33433	0	5	167987909	167987970	+	MI0007261
CAAGCAGCATTGTACAGGGCTATG	24	hsa-mir-103b-1	2	25	R	0	0	0	0	4	0	0	0	0.666667	0	0	#DIV/0!	1.06747	0	5	167987909	167987970	+	MI0007261
CTTTACAGTGCTGCCT	16	hsa-mir-103b-1	40	55	R	0	0	0	0	4	0	0	0	0.666667	0	0	#DIV/0!	1.06747	0	5	167987909	167987970	+	MI0007261
TTACAGTGCTGCCTTG	16	hsa-mir-103b-1	38	53	R	4	4	0	0	0	0	0	0	0.666667	0	0	#DIV/0!	1.06747	0	5	167987909	167987970	+	MI0007261
CTTTACAGTGCTGCCTTGTTGC	22	hsa-mir-103b-1	34	55	R	0	0	2	0	0	0	0	0	0.333333	0	0	#DIV/0!	0.533733	0	5	167987909	167987970	+	MI0007261
GGCTTCTTTACAGTGCTGCC	20	hsa-mir-103b-1	41	60	R	2	2	0	0	0	0	0	0	0.333333	0	0	#DIV/0!	0.533733	0	5	167987909	167987970	+	MI0007261
AAGCAGCATTGTACAGGGCTA	21	hsa-mir-103b-1	4	24	R	0	0	0	0	0	0	0	5	0	0	4.58885	#DIV/0!	0	#DIV/0!	5	167987909	167987970	+	MI0007261
CTTCTTTACAGTGCTGCCTTG	21	hsa-mir-103b-1	38	58	R	0	0	0	0	0	0	0	4	0	0	3.67108	#DIV/0!	0	#DIV/0!	5	167987909	167987970	+	MI0007261
CTTCTTTACAGTGCTGCCT	19	hsa-mir-103b-1	40	58	R	0	0	0	0	0	0	0	8	0	0	7.34216	#DIV/0!	0	#DIV/0!	5	167987909	167987970	+	MI0007261
CATTGTACAGGGCTAT	16	hsa-mir-103b-1	3	18	R	0	0	0	0	0	0	0	5	0	0	4.58885	#DIV/0!	0	#DIV/0!	5	167987909	167987970	+	MI0007261
CAGCATTGTACAGGG	15	hsa-mir-103b-1	7	21	R	0	0	0	0	0	0	0	15	0	0	13.7665	#DIV/0!	0	#DIV/0!	5	167987909	167987970	+	MI0007261
AGCAGCATTGTACAGGGCTATGA	23	hsa-mir-103b-2	1	23	R	4	292608	228176	263376	236364	254844	178108	297808	242246	232109	273319	1.17755	202058	1.14873	20	3898149	3898210	-	MI0007262
AGCAGCATTGTACAGGGCTATG	22	hsa-mir-103b-2	2	23	R	4	68256	50412	54008	51960	53728	50780	65640	54857.3	52838.7	60242.4	1.14012	45534.9	1.1604	20	3898149	3898210	-	MI0007262
AGCAGCATTGTACAGGGCTAT	21	hsa-mir-103b-2	3	23	R	5	46270	34735	41505	38535	36275	42940	54710	40043.3	40240	50211.2	1.24779	31901.2	1.26139	20	3898149	3898210	-	MI0007262
AGCAGCATTGTACAGGGCTA	20	hsa-mir-103b-2	4	23	R	5	21190	20620	23620	22055	17435	21810	26165	21121.7	20955	24013.5	1.14595	17043.4	1.22951	20	3898149	3898210	-	MI0007262
AGCAGCATTGTACAGGGCT	19	hsa-mir-103b-2	5	23	R	5	21655	14975	16135	15985	15250	22975	20125	17829.2	18120	18470.1	1.01932	14041.2	1.29049	20	3898149	3898210	-	MI0007262
AGCAGCATTGTACAGGGC	18	hsa-mir-103b-2	6	23	R	5	9170	7345	7015	7480	6605	7835	11390	7575	7151.67	10453.4	1.46167	6403.47	1.11684	20	3898149	3898210	-	MI0007262
CAGCATTGTACAGGGCTATGA	21	hsa-mir-103b-2	1	21	R	4	880	720	772	824	624	724	972	757.333	706.667	892.072	1.26237	646.885	1.09242	20	3898149	3898210	-	MI0007262
AGCAGCATTGTACAGGG	17	hsa-mir-103b-2	7	23	R	5	360	260	200	290	290	270	530	278.333	253.333	486.418	1.92007	242.849	1.04317	20	3898149	3898210	-	MI0007262
ATTGTACAGGGCTATGA	17	hsa-mir-103b-2	1	17	R	4	80	104	140	100	108	164	132	116	137.333	121.146	0.882128	75.7901	1.81202	20	3898149	3898210	-	MI0007262
AGCAGCATTGTACAGG	16	hsa-mir-103b-2	8	23	R	5	50	90	50	55	80	65	155	65	65	142.254	2.18853	52.039	1.24906	20	3898149	3898210	-	MI0007262
CAGCATTGTACAGGGCTA	18	hsa-mir-103b-2	4	21	R	5	70	25	75	65	20	95	40	58.3333	63.3333	36.7108	0.579644	42.6987	1.48326	20	3898149	3898210	-	MI0007262
GCAGCATTGTACAGGGCTATGA	22	hsa-mir-103b-2	1	22	R	4	80	64	60	36	56	72	76	61.3333	62.6667	69.7505	1.11304	48.036	1.30458	20	3898149	3898210	-	MI0007262
AGCTTCTTTACAGTGCTGCCTTG	23	hsa-mir-103b-2	38	60	R	2	62	66	44	42	62	44	110	53.3333	50	100.955	2.01909	45.3673	1.10211	20	3898149	3898210	-	MI0007262
TTGTACAGGGCTATGA	16	hsa-mir-103b-2	1	16	R	4	52	16	48	8	28	64	4	36	46.6667	3.67108	0.078666	20.2819	2.30091	20	3898149	3898210	-	MI0007262
AGCTTCTTTACAGTGCTGCCTTGT	24	hsa-mir-103b-2	37	60	R	2	28	18	44	48	52	42	88	38.6667	46	80.7638	1.75573	25.0855	1.83373	20	3898149	3898210	-	MI0007262
AGCATTGTACAGGGCTATGA	20	hsa-mir-103b-2	1	20	R	4	60	52	48	16	44	40	56	43.3333	44	51.3951	1.16807	34.1589	1.2881	20	3898149	3898210	-	MI0007262
CAGCATTGTACAGGGCTATG	20	hsa-mir-103b-2	2	21	R	4	44	64	60	76	28	40	32	52	42.6667	29.3686	0.688327	49.1035	0.868914	20	3898149	3898210	-	MI0007262
TGTACAGGGCTATGA	15	hsa-mir-103b-2	1	15	R	4	12	16	64	20	16	48	12	29.3333	42.6667	11.0132	0.258123	12.8096	3.33084	20	3898149	3898210	-	MI0007262
CAGCATTGTACAGGGCTAT	19	hsa-mir-103b-2	3	21	R	5	20	25	25	20	35	30	30	25.8333	30	27.5331	0.91777	17.3463	1.72947	20	3898149	3898210	-	MI0007262
GCAGCATTGTACAGGGCTATG	21	hsa-mir-103b-2	2	22	R	4	28	24	28	56	32	24	24	32	28	22.0265	0.78666	28.8216	0.971494	20	3898149	3898210	-	MI0007262
CATTGTACAGGGCTATGA	18	hsa-mir-103b-2	1	18	R	4	20	16	24	4	24	36	12	20.6667	28	11.0132	0.39333	10.6747	2.62303	20	3898149	3898210	-	MI0007262
GCAGCATTGTACAGGGCTAT	20	hsa-mir-103b-2	3	22	R	5	10	10	40	20	10	20	25	18.3333	23.3333	22.9443	0.983325	10.6747	2.18586	20	3898149	3898210	-	MI0007262
GCATTGTACAGGGCTATGA	19	hsa-mir-103b-2	1	19	R	4	32	28	16	8	24	16	20	20.6667	18.6667	18.3554	0.983325	18.1469	1.02864	20	3898149	3898210	-	MI0007262
AGCAGCATTGTACAG	15	hsa-mir-103b-2	9	23	R	5	15	0	10	5	20	20	15	11.6667	16.6667	13.7665	0.825993	5.33733	3.12266	20	3898149	3898210	-	MI0007262
AGCATTGTACAGGGCTATG	19	hsa-mir-103b-2	2	20	R	4	12	16	16	8	8	24	16	14	16	14.6843	0.91777	9.6072	1.66542	20	3898149	3898210	-	MI0007262
CAGCATTGTACAGGGC	16	hsa-mir-103b-2	6	21	R	0	0	10	20	20	10	15	15	12.5	15	13.7665	0.91777	8.006	1.87359	20	3898149	3898210	-	MI0007262
GCAGCATTGTACAGGGCT	18	hsa-mir-103b-2	5	22	R	5	25	5	20	20	5	10	0	14.1667	11.6667	0	0	13.3433	0.874344	20	3898149	3898210	-	MI0007262
ATTGTACAGGGCTAT	15	hsa-mir-103b-2	3	17	R	5	25	10	5	0	10	15	5	10.8333	10	4.58885	0.458885	9.34033	1.07063	20	3898149	3898210	-	MI0007262
AGCATTGTACAGGGCTAT	18	hsa-mir-103b-2	3	20	R	5	20	5	5	15	10	10	5	10.8333	8.33333	4.58885	0.550662	10.6747	0.780665	20	3898149	3898210	-	MI0007262
CAGCATTGTACAGGGCT	17	hsa-mir-103b-2	5	21	R	5	10	0	15	25	0	10	15	10	8.33333	13.7665	1.65199	9.34033	0.892188	20	3898149	3898210	-	MI0007262
ATTGTACAGGGCTATG	16	hsa-mir-103b-2	2	17	R	4	16	4	8	4	8	8	12	8	8	11.0132	1.37665	6.4048	1.24906	20	3898149	3898210	-	MI0007262
GCAGCATTGTACAGGGCTA	19	hsa-mir-103b-2	4	22	R	5	20	10	10	10	0	10	10	10	6.66667	9.1777	1.37665	10.6747	0.624532	20	3898149	3898210	-	MI0007262
AAGCAGCATTGTACAGGGCTATG	23	hsa-mir-103b-2	2	24	R	4	12	4	8	0	8	4	4	6	6.66667	3.67108	0.550662	4.26987	1.56133	20	3898149	3898210	-	MI0007262
AAGCAGCATTGTACAGGGCTATGA	24	hsa-mir-103b-2	1	24	R	4	12	8	16	0	0	0	12	6	5.33333	11.0132	2.06498	5.33733	0.999251	20	3898149	3898210	-	MI0007262
AAGCAGCATTGTACAGGGCTAT	22	hsa-mir-103b-2	3	24	R	5	5	0	0	25	5	10	15	7.5	5	13.7665	2.75331	8.006	0.624532	20	3898149	3898210	-	MI0007262
GCAGCATTGTACAGGGC	17	hsa-mir-103b-2	6	22	R	5	5	0	0	5	5	10	5	4.16667	5	4.58885	0.91777	2.66867	1.87359	20	3898149	3898210	-	MI0007262
GCATTGTACAGGGCTAT	17	hsa-mir-103b-2	3	19	R	5	5	5	10	0	5	0	0	4.16667	5	0	0	2.66867	1.87359	20	3898149	3898210	-	MI0007262
GCATTGTACAGGGCTATG	18	hsa-mir-103b-2	2	19	R	4	4	0	0	0	0	12	4	2.66667	4	3.67108	0.91777	1.06747	3.74719	20	3898149	3898210	-	MI0007262
AGCATTGTACAGGGCTA	17	hsa-mir-103b-2	4	20	R	5	15	0	0	10	10	0	0	5.83333	3.33333	0	0	6.67167	0.499625	20	3898149	3898210	-	MI0007262
AAGCAGCATTGTACAGGGCT	20	hsa-mir-103b-2	5	24	R	5	10	0	0	0	5	5	0	3.33333	3.33333	0	0	2.66867	1.24906	20	3898149	3898210	-	MI0007262
GCATTGTACAGGGCT	15	hsa-mir-103b-2	5	19	R	0	0	0	5	10	0	5	0	3.33333	3.33333	0	0	2.66867	1.24906	20	3898149	3898210	-	MI0007262
AGCATTGTACAGGGCT	16	hsa-mir-103b-2	5	20	R	0	0	0	5	0	0	5	20	1.66667	3.33333	18.3554	5.50662	0	#DIV/0!	20	3898149	3898210	-	MI0007262
CATTGTACAGGGCTA	15	hsa-mir-103b-2	4	18	R	0	0	0	0	0	0	10	0	1.66667	3.33333	0	0	0	#DIV/0!	20	3898149	3898210	-	MI0007262
AGCTTCTTTACAGTGCTGCCTT	22	hsa-mir-103b-2	39	60	R	0	0	10	0	6	0	8	6	4	2.66667	5.50662	2.06498	4.26987	0.624532	20	3898149	3898210	-	MI0007262
TTGTACAGGGCTATG	15	hsa-mir-103b-2	2	16	R	0	0	4	4	4	0	4	0	2.66667	2.66667	0	0	2.13493	1.24906	20	3898149	3898210	-	MI0007262
CTTTACAGTGCTGCC	15	hsa-mir-103b-2	41	55	R	0	0	0	0	0	0	8	0	1.33333	2.66667	0	0	0	#DIV/0!	20	3898149	3898210	-	MI0007262
AGCATTGTACAGGGC	15	hsa-mir-103b-2	6	20	R	0	0	5	0	5	0	5	0	2.5	1.66667	0	0	2.66867	0.624532	20	3898149	3898210	-	MI0007262
AGGTCAAGCAGCATTGTACAGGGCT	25	hsa-mir-103b-2	5	29	R	2	4	0	0	0	2	2	0	1.33333	1.33333	0	0	1.06747	1.24906	20	3898149	3898210	-	MI0007262
CATTGTACAGGGCTATG	17	hsa-mir-103b-2	2	18	R	0	0	4	0	0	0	4	0	1.33333	1.33333	0	0	1.06747	1.24906	20	3898149	3898210	-	MI0007262
AGCTTCTTTACAGTGCTGCC	20	hsa-mir-103b-2	41	60	R	2	2	0	4	0	0	0	0	1	1.33333	0	0	0.533733	2.49813	20	3898149	3898210	-	MI0007262
TCAAGCAGCATTGTACAGGGCTATG	25	hsa-mir-103b-2	2	26	R	0	0	0	4	0	0	0	0	0.666667	1.33333	0	0	0	#DIV/0!	20	3898149	3898210	-	MI0007262
TCTTTACAGTGCTGCC	16	hsa-mir-103b-2	41	56	R	0	0	0	0	0	0	4	0	0.666667	1.33333	0	0	0	#DIV/0!	20	3898149	3898210	-	MI0007262
TTTACAGTGCTGCCT	15	hsa-mir-103b-2	40	54	R	0	0	0	4	0	0	0	0	0.666667	1.33333	0	0	0	#DIV/0!	20	3898149	3898210	-	MI0007262
AGCTTCTTTACAGTGCTGCCT	21	hsa-mir-103b-2	40	60	R	2	4	2	2	8	0	0	10	2.66667	0.666667	9.1777	13.7666	3.73613	0.178438	20	3898149	3898210	-	MI0007262
AGCTTCTTTACAGTGCTG	18	hsa-mir-103b-2	43	60	R	0	0	0	0	2	0	2	0	0.666667	0.666667	0	0	0.533733	1.24906	20	3898149	3898210	-	MI0007262
GTCAAGCAGCATTGTACAGGGCTATGA	27	hsa-mir-103b-2	1	27	R	0	0	0	2	0	0	0	0	0.333333	0.666667	0	0	0	#DIV/0!	20	3898149	3898210	-	MI0007262
GCATTGTACAGGGCTA	16	hsa-mir-103b-2	4	19	R	5	5	0	0	10	0	0	0	2.5	0	0	#DIV/0!	4.003	0	20	3898149	3898210	-	MI0007262
TCTTTACAGTGCTGCCT	17	hsa-mir-103b-2	40	56	R	4	4	4	0	4	0	0	0	2	0	0	#DIV/0!	3.2024	0	20	3898149	3898210	-	MI0007262
AAGCAGCATTGTACAGGGC	19	hsa-mir-103b-2	6	24	R	0	0	0	0	5	0	0	0	0.833333	0	0	#DIV/0!	1.33433	0	20	3898149	3898210	-	MI0007262
CAAGCAGCATTGTACAGGGCTATG	24	hsa-mir-103b-2	2	25	R	0	0	0	0	4	0	0	0	0.666667	0	0	#DIV/0!	1.06747	0	20	3898149	3898210	-	MI0007262
CTTTACAGTGCTGCCT	16	hsa-mir-103b-2	40	55	R	0	0	0	0	4	0	0	0	0.666667	0	0	#DIV/0!	1.06747	0	20	3898149	3898210	-	MI0007262
TTACAGTGCTGCCTTG	16	hsa-mir-103b-2	38	53	R	4	4	0	0	0	0	0	0	0.666667	0	0	#DIV/0!	1.06747	0	20	3898149	3898210	-	MI0007262
TTGTAGCATTCAGGTCAAGCAGCATTG	27	hsa-mir-103b-2	14	40	R	2	2	0	0	0	0	0	0	0.333333	0	0	#DIV/0!	0.533733	0	20	3898149	3898210	-	MI0007262
GGTCAAGCAGCATTGTACAGGGC	23	hsa-mir-103b-2	6	28	R	0	0	0	0	2	0	0	0	0.333333	0	0	#DIV/0!	0.533733	0	20	3898149	3898210	-	MI0007262
ATTCAGGTCAAGCAGCATTGTACAGGGCTATGA	33	hsa-mir-103b-2	1	33	R	0	0	0	0	0	0	0	2	0	0	1.83554	#DIV/0!	0	#DIV/0!	20	3898149	3898210	-	MI0007262
AGGTCAAGCAGCATTGTACAGGGC	24	hsa-mir-103b-2	6	29	R	0	0	0	0	0	0	0	2	0	0	1.83554	#DIV/0!	0	#DIV/0!	20	3898149	3898210	-	MI0007262
TTCAGGTCAAGCAGCATTGTACA	23	hsa-mir-103b-2	10	32	R	0	0	0	0	0	0	0	2	0	0	1.83554	#DIV/0!	0	#DIV/0!	20	3898149	3898210	-	MI0007262
AAGCAGCATTGTACAGGGCTA	21	hsa-mir-103b-2	4	24	R	0	0	0	0	0	0	0	5	0	0	4.58885	#DIV/0!	0	#DIV/0!	20	3898149	3898210	-	MI0007262
CTTCTTTACAGTGCTGCCTTG	21	hsa-mir-103b-2	38	58	R	0	0	0	0	0	0	0	4	0	0	3.67108	#DIV/0!	0	#DIV/0!	20	3898149	3898210	-	MI0007262
CTTCTTTACAGTGCTGCCT	19	hsa-mir-103b-2	40	58	R	0	0	0	0	0	0	0	8	0	0	7.34216	#DIV/0!	0	#DIV/0!	20	3898149	3898210	-	MI0007262
CATTGTACAGGGCTAT	16	hsa-mir-103b-2	3	18	R	0	0	0	0	0	0	0	5	0	0	4.58885	#DIV/0!	0	#DIV/0!	20	3898149	3898210	-	MI0007262
CAGCATTGTACAGGG	15	hsa-mir-103b-2	7	21	R	0	0	0	0	0	0	0	15	0	0	13.7665	#DIV/0!	0	#DIV/0!	20	3898149	3898210	-	MI0007262
TCAAATGCTCAGACTCCTGTGGT	23	hsa-mir-105-1	13	35	F	2	132	114	180	112	154	104	150	132.667	146	137.666	0.942914	95.5383	1.52818	X	151560691	151560771	-	MI0000111
AAATGCTCAGACTCCTGTGGTG	22	hsa-mir-105-1	15	36	F	2	78	58	88	64	64	42	140	65.6667	64.6667	128.488	1.98692	53.3733	1.21159	X	151560691	151560771	-	MI0000111
TCAAATGCTCAGACTCCTGTGG	22	hsa-mir-105-1	13	34	F	2	24	56	62	50	60	52	130	50.6667	58	119.31	2.05707	34.6927	1.67182	X	151560691	151560771	-	MI0000111
CCACGGATGTTTGAGCATGTGCT	23	hsa-mir-105-1	49	71	F	2	22	22	26	30	42	50	36	32	39.3333	33.0397	0.839993	19.7481	1.99175	X	151560691	151560771	-	MI0000111
ACGGATGTTTGAGCATGTGCT	21	hsa-mir-105-1	51	71	F	2	16	18	20	28	36	28	44	24.3333	28	40.3819	1.44221	16.5457	1.69228	X	151560691	151560771	-	MI0000111
TCAAATGCTCAGACTCCTG	19	hsa-mir-105-1	13	31	F	2	12	6	32	26	12	36	18	20.6667	26.6667	16.5199	0.619495	11.7421	2.27102	X	151560691	151560771	-	MI0000111
AAATGCTCAGACTCCTGTGGT	21	hsa-mir-105-1	15	35	F	2	12	32	18	30	22	22	24	22.6667	20.6667	22.0265	1.0658	19.7481	1.04651	X	151560691	151560771	-	MI0000111
AAATGCTCAGACTCCTGTGG	20	hsa-mir-105-1	15	34	F	2	12	18	30	20	12	20	32	18.6667	20.6667	29.3686	1.42106	13.3433	1.54884	X	151560691	151560771	-	MI0000111
TCAAATGCTCAGACTCCTGTGGTG	24	hsa-mir-105-1	13	36	F	2	10	10	10	10	12	8	28	10	10	25.6976	2.56976	8.006	1.24906	X	151560691	151560771	-	MI0000111
AAATGCTCAGACTCCTG	17	hsa-mir-105-1	15	31	F	0	0	2	6	2	4	10	8	4	6.66667	7.34216	1.10132	1.06747	6.24532	X	151560691	151560771	-	MI0000111
CACGGATGTTTGAGCATGTGCT	22	hsa-mir-105-1	50	71	F	2	8	12	4	0	10	4	16	6.33333	6	14.6843	2.44739	5.33733	1.12416	X	151560691	151560771	-	MI0000111
CAAATGCTCAGACTCCTGTGGT	22	hsa-mir-105-1	14	35	F	0	0	2	4	0	4	10	4	3.33333	6	3.67108	0.611847	0.533733	11.2416	X	151560691	151560771	-	MI0000111
TCAAATGCTCAGACTCCTGTG	21	hsa-mir-105-1	13	33	F	0	0	10	6	16	4	6	8	7	5.33333	7.34216	1.37665	6.93853	0.768654	X	151560691	151560771	-	MI0000111
AATGCTCAGACTCCTGTGG	19	hsa-mir-105-1	16	34	F	2	2	2	2	4	4	0	2	2.33333	2	1.83554	0.91777	2.13493	0.936797	X	151560691	151560771	-	MI0000111
TCAAATGCTCAGACTCCT	18	hsa-mir-105-1	13	30	F	2	2	0	0	4	2	4	0	2	2	0	0	1.6012	1.24906	X	151560691	151560771	-	MI0000111
AAATGCTCAGACTCCTGTGGTGG	23	hsa-mir-105-1	15	37	F	0	0	0	4	4	0	2	6	1.66667	2	5.50662	2.75331	1.06747	1.87359	X	151560691	151560771	-	MI0000111
AATGCTCAGACTCCTGTGGTG	21	hsa-mir-105-1	16	36	F	0	0	4	2	0	0	4	2	1.66667	2	1.83554	0.91777	1.06747	1.87359	X	151560691	151560771	-	MI0000111
TCAAATGCTCAGACT	15	hsa-mir-105-1	13	27	F	0	0	2	0	2	0	6	4	1.66667	2	3.67108	1.83554	1.06747	1.87359	X	151560691	151560771	-	MI0000111
AATGCTCAGACTCCTGTGGTGGC	23	hsa-mir-105-1	16	38	F	0	0	0	0	0	4	0	0	0.666667	1.33333	0	0	0	#DIV/0!	X	151560691	151560771	-	MI0000111
GTCAAATGCTCAGACTCCTGTGG	23	hsa-mir-105-1	12	34	F	0	0	0	0	0	0	4	0	0.666667	1.33333	0	0	0	#DIV/0!	X	151560691	151560771	-	MI0000111
TCAAATGCTCAGACTCC	17	hsa-mir-105-1	13	29	F	0	0	0	2	0	0	2	0	0.666667	1.33333	0	0	0	#DIV/0!	X	151560691	151560771	-	MI0000111
AATGCTCAGACTCCTGTGGTGG	22	hsa-mir-105-1	16	37	F	0	0	2	0	4	2	0	0	1.33333	0.666667	0	0	1.6012	0.416354	X	151560691	151560771	-	MI0000111
AAATGCTCAGACTCCTGTG	19	hsa-mir-105-1	15	33	F	2	4	0	2	2	0	0	0	1.33333	0.666667	0	0	1.6012	0.416354	X	151560691	151560771	-	MI0000111
CAAATGCTCAGACTCCTGTGGTG	23	hsa-mir-105-1	14	36	F	2	4	0	0	0	2	0	0	1	0.666667	0	0	1.06747	0.624532	X	151560691	151560771	-	MI0000111
CCACGGATGTTTGAGCATGTGC	22	hsa-mir-105-1	49	70	F	0	0	4	2	0	0	0	2	1	0.666667	1.83554	2.75331	1.06747	0.624532	X	151560691	151560771	-	MI0000111
AATGCTCAGACTCCTGTGGT	20	hsa-mir-105-1	16	35	F	2	4	0	0	0	2	0	0	1	0.666667	0	0	1.06747	0.624532	X	151560691	151560771	-	MI0000111
CCACGGATGTTTGAGCATGTG	21	hsa-mir-105-1	49	69	F	0	0	2	0	0	2	0	0	0.666667	0.666667	0	0	0.533733	1.24906	X	151560691	151560771	-	MI0000111
AAATGCTCAGACTCCTGTGGTGGC	24	hsa-mir-105-1	15	38	F	0	0	0	2	0	0	0	0	0.333333	0.666667	0	0	0	#DIV/0!	X	151560691	151560771	-	MI0000111
GTCAAATGCTCAGACTCCTGTGGT	24	hsa-mir-105-1	12	35	F	0	0	0	0	0	2	0	0	0.333333	0.666667	0	0	0	#DIV/0!	X	151560691	151560771	-	MI0000111
ATGCACCACGGATGTTTGAGCAT	23	hsa-mir-105-1	44	66	F	0	0	0	2	0	0	0	0	0.333333	0.666667	0	0	0	#DIV/0!	X	151560691	151560771	-	MI0000111
CATGCACCACGGATGTTTGAGC	22	hsa-mir-105-1	43	64	F	0	0	0	2	0	0	0	0	0.333333	0.666667	0	0	0	#DIV/0!	X	151560691	151560771	-	MI0000111
ACGGATGTTTGAGCATGTGC	20	hsa-mir-105-1	51	70	F	0	0	0	0	0	2	0	0	0.333333	0.666667	0	0	0	#DIV/0!	X	151560691	151560771	-	MI0000111
ATGCTCAGACTCCTGTGGTG	20	hsa-mir-105-1	17	36	F	0	0	0	0	0	0	2	0	0.333333	0.666667	0	0	0	#DIV/0!	X	151560691	151560771	-	MI0000111
TCAAATGCTCAGACTCCTGTGGTGG	25	hsa-mir-105-1	13	37	F	2	6	0	0	2	0	0	0	1.33333	0	0	#DIV/0!	2.13493	0	X	151560691	151560771	-	MI0000111
CAAATGCTCAGACTCCTGTGG	21	hsa-mir-105-1	14	34	F	0	0	8	0	0	0	0	0	1.33333	0	0	#DIV/0!	2.13493	0	X	151560691	151560771	-	MI0000111
CCACGGATGTTTGAGCATGTGCTA	24	hsa-mir-105-1	49	72	F	0	0	0	0	4	0	0	0	0.666667	0	0	#DIV/0!	1.06747	0	X	151560691	151560771	-	MI0000111
CCACGGATGTTTGAGCATGT	20	hsa-mir-105-1	49	68	F	0	0	0	0	4	0	0	0	0.666667	0	0	#DIV/0!	1.06747	0	X	151560691	151560771	-	MI0000111
TCAAATGCTCAGACTCCTGT	20	hsa-mir-105-1	13	32	F	0	0	4	0	0	0	0	0	0.666667	0	0	#DIV/0!	1.06747	0	X	151560691	151560771	-	MI0000111
AAATGCTCAGACTCCT	16	hsa-mir-105-1	15	30	F	2	4	0	0	0	0	0	0	0.666667	0	0	#DIV/0!	1.06747	0	X	151560691	151560771	-	MI0000111
AAATGCTCAGACTCC	15	hsa-mir-105-1	15	29	F	0	0	2	0	2	0	0	0	0.666667	0	0	#DIV/0!	1.06747	0	X	151560691	151560771	-	MI0000111
CACGGATGTTTGAGCATGTGC	21	hsa-mir-105-1	50	70	F	2	2	0	0	0	0	0	2	0.333333	0	1.83554	#DIV/0!	0.533733	0	X	151560691	151560771	-	MI0000111
GTCAAATGCTCAGACTCCTGT	21	hsa-mir-105-1	12	32	F	2	2	0	0	0	0	0	0	0.333333	0	0	#DIV/0!	0.533733	0	X	151560691	151560771	-	MI0000111
AAATGCTCAGACTCCTGT	18	hsa-mir-105-1	15	32	F	2	2	0	0	0	0	0	0	0.333333	0	0	#DIV/0!	0.533733	0	X	151560691	151560771	-	MI0000111
TCAAATGCTCAGACTC	16	hsa-mir-105-1	13	28	F	2	2	0	0	0	0	0	0	0.333333	0	0	#DIV/0!	0.533733	0	X	151560691	151560771	-	MI0000111
CCACGGATGTTTGAGCATG	19	hsa-mir-105-1	49	67	F	0	0	0	0	0	0	0	2	0	0	1.83554	#DIV/0!	0	#DIV/0!	X	151560691	151560771	-	MI0000111
TCAAATGCTCAGACTCCTGTGGT	23	hsa-mir-105-2	13	35	F	2	132	114	180	112	154	104	150	132.667	146	137.666	0.942914	95.5383	1.52818	X	151562884	151562964	-	MI0000112
AAATGCTCAGACTCCTGTGGTG	22	hsa-mir-105-2	15	36	F	2	78	58	88	64	64	42	140	65.6667	64.6667	128.488	1.98692	53.3733	1.21159	X	151562884	151562964	-	MI0000112
TCAAATGCTCAGACTCCTGTGG	22	hsa-mir-105-2	13	34	F	2	24	56	62	50	60	52	130	50.6667	58	119.31	2.05707	34.6927	1.67182	X	151562884	151562964	-	MI0000112
CCACGGATGTTTGAGCATGTGCT	23	hsa-mir-105-2	49	71	F	2	22	22	26	30	42	50	36	32	39.3333	33.0397	0.839993	19.7481	1.99175	X	151562884	151562964	-	MI0000112
ACGGATGTTTGAGCATGTGCT	21	hsa-mir-105-2	51	71	F	2	16	18	20	28	36	28	44	24.3333	28	40.3819	1.44221	16.5457	1.69228	X	151562884	151562964	-	MI0000112
TCAAATGCTCAGACTCCTG	19	hsa-mir-105-2	13	31	F	2	12	6	32	26	12	36	18	20.6667	26.6667	16.5199	0.619495	11.7421	2.27102	X	151562884	151562964	-	MI0000112
AAATGCTCAGACTCCTGTGGT	21	hsa-mir-105-2	15	35	F	2	12	32	18	30	22	22	24	22.6667	20.6667	22.0265	1.0658	19.7481	1.04651	X	151562884	151562964	-	MI0000112
AAATGCTCAGACTCCTGTGG	20	hsa-mir-105-2	15	34	F	2	12	18	30	20	12	20	32	18.6667	20.6667	29.3686	1.42106	13.3433	1.54884	X	151562884	151562964	-	MI0000112
TCAAATGCTCAGACTCCTGTGGTG	24	hsa-mir-105-2	13	36	F	2	10	10	10	10	12	8	28	10	10	25.6976	2.56976	8.006	1.24906	X	151562884	151562964	-	MI0000112
AAATGCTCAGACTCCTG	17	hsa-mir-105-2	15	31	F	0	0	2	6	2	4	10	8	4	6.66667	7.34216	1.10132	1.06747	6.24532	X	151562884	151562964	-	MI0000112
CACGGATGTTTGAGCATGTGCT	22	hsa-mir-105-2	50	71	F	2	8	12	4	0	10	4	16	6.33333	6	14.6843	2.44739	5.33733	1.12416	X	151562884	151562964	-	MI0000112
CAAATGCTCAGACTCCTGTGGT	22	hsa-mir-105-2	14	35	F	0	0	2	4	0	4	10	4	3.33333	6	3.67108	0.611847	0.533733	11.2416	X	151562884	151562964	-	MI0000112
TCAAATGCTCAGACTCCTGTG	21	hsa-mir-105-2	13	33	F	0	0	10	6	16	4	6	8	7	5.33333	7.34216	1.37665	6.93853	0.768654	X	151562884	151562964	-	MI0000112
AATGCTCAGACTCCTGTGG	19	hsa-mir-105-2	16	34	F	2	2	2	2	4	4	0	2	2.33333	2	1.83554	0.91777	2.13493	0.936797	X	151562884	151562964	-	MI0000112
TCAAATGCTCAGACTCCT	18	hsa-mir-105-2	13	30	F	2	2	0	0	4	2	4	0	2	2	0	0	1.6012	1.24906	X	151562884	151562964	-	MI0000112
AAATGCTCAGACTCCTGTGGTGG	23	hsa-mir-105-2	15	37	F	0	0	0	4	4	0	2	6	1.66667	2	5.50662	2.75331	1.06747	1.87359	X	151562884	151562964	-	MI0000112
AATGCTCAGACTCCTGTGGTG	21	hsa-mir-105-2	16	36	F	0	0	4	2	0	0	4	2	1.66667	2	1.83554	0.91777	1.06747	1.87359	X	151562884	151562964	-	MI0000112
TCAAATGCTCAGACT	15	hsa-mir-105-2	13	27	F	0	0	2	0	2	0	6	4	1.66667	2	3.67108	1.83554	1.06747	1.87359	X	151562884	151562964	-	MI0000112
AATGCTCAGACTCCTGTGGTGGC	23	hsa-mir-105-2	16	38	F	0	0	0	0	0	4	0	0	0.666667	1.33333	0	0	0	#DIV/0!	X	151562884	151562964	-	MI0000112
GTCAAATGCTCAGACTCCTGTGG	23	hsa-mir-105-2	12	34	F	0	0	0	0	0	0	4	0	0.666667	1.33333	0	0	0	#DIV/0!	X	151562884	151562964	-	MI0000112
TCAAATGCTCAGACTCC	17	hsa-mir-105-2	13	29	F	0	0	0	2	0	0	2	0	0.666667	1.33333	0	0	0	#DIV/0!	X	151562884	151562964	-	MI0000112
AATGCTCAGACTCCTGTGGTGG	22	hsa-mir-105-2	16	37	F	0	0	2	0	4	2	0	0	1.33333	0.666667	0	0	1.6012	0.416354	X	151562884	151562964	-	MI0000112
AAATGCTCAGACTCCTGTG	19	hsa-mir-105-2	15	33	F	2	4	0	2	2	0	0	0	1.33333	0.666667	0	0	1.6012	0.416354	X	151562884	151562964	-	MI0000112
CAAATGCTCAGACTCCTGTGGTG	23	hsa-mir-105-2	14	36	F	2	4	0	0	0	2	0	0	1	0.666667	0	0	1.06747	0.624532	X	151562884	151562964	-	MI0000112
CCACGGATGTTTGAGCATGTGC	22	hsa-mir-105-2	49	70	F	0	0	4	2	0	0	0	2	1	0.666667	1.83554	2.75331	1.06747	0.624532	X	151562884	151562964	-	MI0000112
AATGCTCAGACTCCTGTGGT	20	hsa-mir-105-2	16	35	F	2	4	0	0	0	2	0	0	1	0.666667	0	0	1.06747	0.624532	X	151562884	151562964	-	MI0000112
CCACGGATGTTTGAGCATGTG	21	hsa-mir-105-2	49	69	F	0	0	2	0	0	2	0	0	0.666667	0.666667	0	0	0.533733	1.24906	X	151562884	151562964	-	MI0000112
AAATGCTCAGACTCCTGTGGTGGC	24	hsa-mir-105-2	15	38	F	0	0	0	2	0	0	0	0	0.333333	0.666667	0	0	0	#DIV/0!	X	151562884	151562964	-	MI0000112
GTCAAATGCTCAGACTCCTGTGGT	24	hsa-mir-105-2	12	35	F	0	0	0	0	0	2	0	0	0.333333	0.666667	0	0	0	#DIV/0!	X	151562884	151562964	-	MI0000112
ATGCACCACGGATGTTTGAGCAT	23	hsa-mir-105-2	44	66	F	0	0	0	2	0	0	0	0	0.333333	0.666667	0	0	0	#DIV/0!	X	151562884	151562964	-	MI0000112
ACGGATGTTTGAGCATGTGC	20	hsa-mir-105-2	51	70	F	0	0	0	0	0	2	0	0	0.333333	0.666667	0	0	0	#DIV/0!	X	151562884	151562964	-	MI0000112
ATGCTCAGACTCCTGTGGTG	20	hsa-mir-105-2	17	36	F	0	0	0	0	0	0	2	0	0.333333	0.666667	0	0	0	#DIV/0!	X	151562884	151562964	-	MI0000112
TCAAATGCTCAGACTCCTGTGGTGG	25	hsa-mir-105-2	13	37	F	2	6	0	0	2	0	0	0	1.33333	0	0	#DIV/0!	2.13493	0	X	151562884	151562964	-	MI0000112
CAAATGCTCAGACTCCTGTGG	21	hsa-mir-105-2	14	34	F	0	0	8	0	0	0	0	0	1.33333	0	0	#DIV/0!	2.13493	0	X	151562884	151562964	-	MI0000112
CCACGGATGTTTGAGCATGTGCTA	24	hsa-mir-105-2	49	72	F	0	0	0	0	4	0	0	0	0.666667	0	0	#DIV/0!	1.06747	0	X	151562884	151562964	-	MI0000112
CCACGGATGTTTGAGCATGT	20	hsa-mir-105-2	49	68	F	0	0	0	0	4	0	0	0	0.666667	0	0	#DIV/0!	1.06747	0	X	151562884	151562964	-	MI0000112
TCAAATGCTCAGACTCCTGT	20	hsa-mir-105-2	13	32	F	0	0	4	0	0	0	0	0	0.666667	0	0	#DIV/0!	1.06747	0	X	151562884	151562964	-	MI0000112
AAATGCTCAGACTCCT	16	hsa-mir-105-2	15	30	F	2	4	0	0	0	0	0	0	0.666667	0	0	#DIV/0!	1.06747	0	X	151562884	151562964	-	MI0000112
AAATGCTCAGACTCC	15	hsa-mir-105-2	15	29	F	0	0	2	0	2	0	0	0	0.666667	0	0	#DIV/0!	1.06747	0	X	151562884	151562964	-	MI0000112
CACGGATGTTTGAGCATGTGC	21	hsa-mir-105-2	50	70	F	2	2	0	0	0	0	0	2	0.333333	0	1.83554	#DIV/0!	0.533733	0	X	151562884	151562964	-	MI0000112
GTCAAATGCTCAGACTCCTGT	21	hsa-mir-105-2	12	32	F	2	2	0	0	0	0	0	0	0.333333	0	0	#DIV/0!	0.533733	0	X	151562884	151562964	-	MI0000112
AAATGCTCAGACTCCTGT	18	hsa-mir-105-2	15	32	F	2	2	0	0	0	0	0	0	0.333333	0	0	#DIV/0!	0.533733	0	X	151562884	151562964	-	MI0000112
TCAAATGCTCAGACTC	16	hsa-mir-105-2	13	28	F	2	2	0	0	0	0	0	0	0.333333	0	0	#DIV/0!	0.533733	0	X	151562884	151562964	-	MI0000112
CCACGGATGTTTGAGCATG	19	hsa-mir-105-2	49	67	F	0	0	0	0	0	0	0	2	0	0	1.83554	#DIV/0!	0	#DIV/0!	X	151562884	151562964	-	MI0000112
AAAAGTGCTTACAGTGCAGGTAG	23	hsa-mir-106a	13	35	F	1	98	56	69	58	65	27	22	62.1667	53.6667	20.1909	0.376229	56.5757	0.948581	X	133304228	133304308	-	MI0000113	ENSG00000207602
AAAAGTGCTTACAGTGCAGGTA	22	hsa-mir-106a	13	34	F	1	34	19	35	22	25	37	8	28.6667	32.3333	7.34216	0.227077	20.015	1.61546	X	133304228	133304308	-	MI0000113	ENSG00000207602
AAAGTGCTTACAGTGCAGGTAG	22	hsa-mir-106a	14	35	F	2	44	26	30	32	22	10	4	27.3333	20.6667	3.67108	0.177633	27.2204	0.759234	X	133304228	133304308	-	MI0000113	ENSG00000207602
AAAAGTGCTTACAGTGCAGGT	21	hsa-mir-106a	13	33	F	1	25	10	17	17	20	18	6	17.8333	18.3333	5.50662	0.300361	13.8771	1.32112	X	133304228	133304308	-	MI0000113	ENSG00000207602
AAAGTGCTTACAGTGCAGGTAGC	23	hsa-mir-106a	14	36	F	1	20	6	6	14	14	5	5	10.8333	8.33333	4.58885	0.550662	10.6747	0.780665	X	133304228	133304308	-	MI0000113	ENSG00000207602
AAAAGTGCTTACAGTGCAGG	20	hsa-mir-106a	13	32	F	1	9	6	2	5	11	5	4	6.33333	6	3.67108	0.611847	5.33733	1.12416	X	133304228	133304308	-	MI0000113	ENSG00000207602
AAAGTGCTTACAGTGCAGGTA	21	hsa-mir-106a	14	34	F	2	2	0	2	2	4	8	6	3	4.66667	5.50662	1.17999	1.06747	4.37172	X	133304228	133304308	-	MI0000113	ENSG00000207602
TACTGCAATGTAAGCACTTCT	21	hsa-mir-106a	48	68	F	1	2	3	3	2	6	2	0	3	3.66667	0	0	1.86807	1.96281	X	133304228	133304308	-	MI0000113	ENSG00000207602
AAAGTGCTTACAGTGCAGGTAGCT	24	hsa-mir-106a	14	37	F	1	1	1	3	0	1	2	1	1.33333	2	0.91777	0.458885	0.533733	3.74719	X	133304228	133304308	-	MI0000113	ENSG00000207602
TACTGCAATGTAAGCACTTCTT	22	hsa-mir-106a	48	69	F	1	6	0	0	2	1	2	0	1.83333	1	0	0	2.13493	0.468399	X	133304228	133304308	-	MI0000113	ENSG00000207602
AAAGTGCTTACAGTGCAGG	19	hsa-mir-106a	14	32	F	0	0	4	0	4	0	2	0	1.66667	0.666667	0	0	2.13493	0.312266	X	133304228	133304308	-	MI0000113	ENSG00000207602
AAAGTGCTTACAGTGCAGGT	20	hsa-mir-106a	14	33	F	2	2	0	0	0	2	0	2	0.666667	0.666667	1.83554	2.75331	0.533733	1.24906	X	133304228	133304308	-	MI0000113	ENSG00000207602
AAAGTGCTTACAGTGCAG	18	hsa-mir-106a	14	31	F	2	2	0	0	0	2	0	0	0.666667	0.666667	0	0	0.533733	1.24906	X	133304228	133304308	-	MI0000113	ENSG00000207602
TTACAGTGCAGGTAG	15	hsa-mir-106a	21	35	F	0	0	0	0	2	0	2	2	0.666667	0.666667	1.83554	2.75331	0.533733	1.24906	X	133304228	133304308	-	MI0000113	ENSG00000207602
AAAAGTGCTTACAGTGCAG	19	hsa-mir-106a	13	31	F	0	0	1	0	0	2	0	1	0.5	0.666667	0.91777	1.37665	0.266867	2.49813	X	133304228	133304308	-	MI0000113	ENSG00000207602
TACTGCAATGTAAGCACTTCTTA	23	hsa-mir-106a	48	70	F	0	0	0	0	0	1	1	0	0.333333	0.666667	0	0	0	#DIV/0!	X	133304228	133304308	-	MI0000113	ENSG00000207602
ACTGCAATGTAAGCACTTCT	20	hsa-mir-106a	49	68	F	1	2	1	1	1	0	0	0	0.833333	0.333333	0	0	1.06747	0.312266	X	133304228	133304308	-	MI0000113	ENSG00000207602
CTACTGCAATGTAAGCACTTCT	22	hsa-mir-106a	47	68	F	0	0	0	0	0	1	0	1	0.166667	0.333333	0.91777	2.75331	0	#DIV/0!	X	133304228	133304308	-	MI0000113	ENSG00000207602
ACTGCAATGTAAGCACTTCTTA	22	hsa-mir-106a	49	70	F	0	0	0	0	0	0	1	0	0.166667	0.333333	0	0	0	#DIV/0!	X	133304228	133304308	-	MI0000113	ENSG00000207602
TACTGCAATGTAAGCACTT	19	hsa-mir-106a	48	66	F	0	0	0	0	0	0	1	0	0.166667	0.333333	0	0	0	#DIV/0!	X	133304228	133304308	-	MI0000113	ENSG00000207602
AAAAGTGCTTACAGTGCA	18	hsa-mir-106a	13	30	F	0	0	0	1	0	0	0	0	0.166667	0.333333	0	0	0	#DIV/0!	X	133304228	133304308	-	MI0000113	ENSG00000207602
TACTGCAATGTAAGCACT	18	hsa-mir-106a	48	65	F	0	0	0	0	0	1	0	0	0.166667	0.333333	0	0	0	#DIV/0!	X	133304228	133304308	-	MI0000113	ENSG00000207602
AAAAGTGCTTACAGTG	16	hsa-mir-106a	13	28	F	0	0	0	0	0	1	0	0	0.166667	0.333333	0	0	0	#DIV/0!	X	133304228	133304308	-	MI0000113	ENSG00000207602
AAAAGTGCTTACAGT	15	hsa-mir-106a	13	27	F	0	0	0	0	0	1	0	0	0.166667	0.333333	0	0	0	#DIV/0!	X	133304228	133304308	-	MI0000113	ENSG00000207602
TAAAAGTGCTTACAGTGCAGGT	22	hsa-mir-106a	12	33	F	1	4	0	0	0	0	0	0	0.666667	0	0	#DIV/0!	1.06747	0	X	133304228	133304308	-	MI0000113	ENSG00000207602
AAAAGTGCTTACAGTGCAGGTAGC	24	hsa-mir-106a	13	36	F	0	0	2	0	0	0	0	0	0.333333	0	0	#DIV/0!	0.533733	0	X	133304228	133304308	-	MI0000113	ENSG00000207602
ACTGCAATGTAAGCACTTCTT	21	hsa-mir-106a	49	69	F	0	0	0	0	2	0	0	0	0.333333	0	0	#DIV/0!	0.533733	0	X	133304228	133304308	-	MI0000113	ENSG00000207602
TACTGCAATGTAAGCACTTC	20	hsa-mir-106a	48	67	F	0	0	0	0	1	0	0	0	0.166667	0	0	#DIV/0!	0.266867	0	X	133304228	133304308	-	MI0000113	ENSG00000207602
ACTGCAATGTAAGCACTT	18	hsa-mir-106a	49	66	F	1	1	0	0	0	0	0	0	0.166667	0	0	#DIV/0!	0.266867	0	X	133304228	133304308	-	MI0000113	ENSG00000207602
CTACTGCAATGTAAGCACTTC	21	hsa-mir-106a	47	67	F	0	0	0	0	0	0	0	1	0	0	0.91777	#DIV/0!	0	#DIV/0!	X	133304228	133304308	-	MI0000113	ENSG00000207602
AAGTGCTTACAGTGCAGGT	19	hsa-mir-106a	15	33	F	0	0	0	0	0	0	0	4	0	0	3.67108	#DIV/0!	0	#DIV/0!	X	133304228	133304308	-	MI0000113	ENSG00000207602
TAAAGTGCTGACAGTGCAGAT	21	hsa-mir-106b	12	32	F	1	981	380	348	486	493	732	539	570	524.333	494.678	0.943442	492.903	1.06377	7	99691616	99691697	-	MI0000734	ENSG00000208036
CCGCACTGTGGGTACTTGCT	20	hsa-mir-106b	52	71	F	1	806	337	301	338	346	724	421	475.333	457	386.381	0.845473	395.23	1.15629	7	99691616	99691697	-	MI0000734	ENSG00000208036
TAAAGTGCTGACAGTGCAGATA	22	hsa-mir-106b	12	33	F	1	659	257	169	308	367	451	326	368.5	329	299.193	0.909401	326.645	1.00721	7	99691616	99691697	-	MI0000734	ENSG00000208036
TAAAGTGCTGACAGTGCAGA	20	hsa-mir-106b	12	31	F	1	548	216	194	335	296	469	283	343	319.667	259.729	0.812499	293.286	1.08995	7	99691616	99691697	-	MI0000734	ENSG00000208036
TACCGCACTGTGGGTACTTGCT	22	hsa-mir-106b	50	71	F	1	376	129	160	165	185	205	155	203.333	183.333	142.254	0.775933	178.801	1.02535	7	99691616	99691697	-	MI0000734	ENSG00000208036
CCGCACTGTGGGTACTTGCTG	21	hsa-mir-106b	52	72	F	1	147	63	51	62	66	130	111	86.5	82.3333	101.872	1.23732	72.5877	1.13426	7	99691616	99691697	-	MI0000734	ENSG00000208036
TAAAGTGCTGACAGTGCAG	19	hsa-mir-106b	12	30	F	1	66	23	28	39	47	64	32	44.5	46.3333	29.3686	0.633856	34.1589	1.3564	7	99691616	99691697	-	MI0000734	ENSG00000208036
CCGCACTGTGGGTACTTGCTGC	22	hsa-mir-106b	52	73	F	1	55	39	28	44	38	50	53	42.3333	38.6667	48.6418	1.25798	36.8276	1.04994	7	99691616	99691697	-	MI0000734	ENSG00000208036
TACCGCACTGTGGGTACT	18	hsa-mir-106b	50	67	F	1	43	21	23	24	21	26	26	26.3333	23.3333	23.862	1.02266	23.4843	0.993573	7	99691616	99691697	-	MI0000734	ENSG00000208036
CCGCACTGTGGGTACTTGCTGCT	23	hsa-mir-106b	52	74	F	1	34	13	18	14	23	25	24	21.1667	22	22.0265	1.0012	16.2789	1.35145	7	99691616	99691697	-	MI0000734	ENSG00000208036
CCGCACTGTGGGTACTTGC	19	hsa-mir-106b	52	70	F	1	44	15	13	26	16	33	16	24.5	20.6667	14.6843	0.710532	22.6837	0.911081	7	99691616	99691697	-	MI0000734	ENSG00000208036
TAAAGTGCTGACAGTG	16	hsa-mir-106b	12	27	F	1	31	13	11	29	25	17	27	21	17.6667	24.7798	1.40263	19.4813	0.906854	7	99691616	99691697	-	MI0000734	ENSG00000208036
ACCGCACTGTGGGTACTTGCT	21	hsa-mir-106b	51	71	F	1	38	14	10	14	18	24	18	19.6667	17.3333	16.5199	0.953069	17.6132	0.98411	7	99691616	99691697	-	MI0000734	ENSG00000208036
TAAAGTGCTGACAGTGCA	18	hsa-mir-106b	12	29	F	1	31	17	14	18	10	24	19	19	16	17.4376	1.08985	17.6132	0.90841	7	99691616	99691697	-	MI0000734	ENSG00000208036
TAAAGTGCTGACAGT	15	hsa-mir-106b	12	26	F	1	17	7	16	7	10	17	15	12.3333	14.3333	13.7665	0.960457	8.27287	1.73257	7	99691616	99691697	-	MI0000734	ENSG00000208036
TAAAGTGCTGACAGTGC	17	hsa-mir-106b	12	28	F	1	25	14	13	15	14	11	17	15.3333	12.6667	15.6021	1.23174	14.4108	0.87897	7	99691616	99691697	-	MI0000734	ENSG00000208036
TAAAGTGCTGACAGTGCAGATAG	23	hsa-mir-106b	12	34	F	1	17	3	13	9	17	8	15	11.1667	12.6667	13.7665	1.08683	7.73913	1.6367	7	99691616	99691697	-	MI0000734	ENSG00000208036
CCGCACTGTGGGTACTTG	18	hsa-mir-106b	52	69	F	1	9	2	5	5	6	9	9	6	6.66667	8.25993	1.23899	4.26987	1.56133	7	99691616	99691697	-	MI0000734	ENSG00000208036
CCGCACTGTGGGTACT	16	hsa-mir-106b	52	67	F	1	11	2	1	13	4	12	0	7.16667	5.66667	0	0	6.93853	0.816695	7	99691616	99691697	-	MI0000734	ENSG00000208036
TACCGCACTGTGGGTACTTGC	21	hsa-mir-106b	50	70	F	1	8	4	1	6	7	5	1	5.16667	4.33333	0.91777	0.211793	4.8036	0.902101	7	99691616	99691697	-	MI0000734	ENSG00000208036
ACCGCACTGTGGGTACTTGCTG	22	hsa-mir-106b	51	72	F	1	9	4	4	5	4	3	3	4.83333	3.66667	2.75331	0.750903	4.8036	0.763316	7	99691616	99691697	-	MI0000734	ENSG00000208036
TAAAGTGCTGACAGTGCAGATAGT	24	hsa-mir-106b	12	35	F	1	12	2	2	2	6	3	4	4.5	3.66667	3.67108	1.0012	4.26987	0.858731	7	99691616	99691697	-	MI0000734	ENSG00000208036
CGCACTGTGGGTACTTGCT	19	hsa-mir-106b	53	71	F	1	1	3	2	0	0	3	1	1.5	1.66667	0.91777	0.550662	1.06747	1.56133	7	99691616	99691697	-	MI0000734	ENSG00000208036
TACCGCACTGTGGGTACTTGCTGC	24	hsa-mir-106b	50	73	F	1	5	1	0	1	0	4	0	1.83333	1.33333	0	0	1.86807	0.71375	7	99691616	99691697	-	MI0000734	ENSG00000208036
TACCGCACTGTGGGTACTTG	20	hsa-mir-106b	50	69	F	0	0	0	2	0	1	1	1	0.666667	1.33333	0.91777	0.688327	0	#DIV/0!	7	99691616	99691697	-	MI0000734	ENSG00000208036
ACCGCACTGTGGGTACT	17	hsa-mir-106b	51	67	F	0	0	0	2	0	1	1	1	0.666667	1.33333	0.91777	0.688327	0	#DIV/0!	7	99691616	99691697	-	MI0000734	ENSG00000208036
ATCTGCACTGTCAGCACTTTAGC	23	hsa-mir-106b	10	32	R	1	2	1	2	0	1	0	1	1	1	0.91777	0.91777	0.8006	1.24906	7	99691616	99691697	-	MI0000734	ENSG00000208036
ACCGCACTGTGGGTACTTGC	20	hsa-mir-106b	51	70	F	1	1	1	1	0	1	1	0	0.833333	1	0	0	0.533733	1.87359	7	99691616	99691697	-	MI0000734	ENSG00000208036
AAAGTGCTGACAGTGCAGATA	21	hsa-mir-106b	13	33	F	1	1	0	2	0	0	0	0	0.5	0.666667	0	0	0.266867	2.49813	7	99691616	99691697	-	MI0000734	ENSG00000208036
TACCGCACTGTGGGTACTT	19	hsa-mir-106b	50	68	F	1	1	0	0	0	0	2	0	0.5	0.666667	0	0	0.266867	2.49813	7	99691616	99691697	-	MI0000734	ENSG00000208036
TACCGCACTGTGGGTACTTGCTG	23	hsa-mir-106b	50	72	F	1	4	2	0	1	0	1	0	1.33333	0.333333	0	0	1.86807	0.178438	7	99691616	99691697	-	MI0000734	ENSG00000208036
ACCGCACTGTGGGTACTTGCTGC	23	hsa-mir-106b	51	73	F	1	1	3	0	0	1	0	2	0.833333	0.333333	1.83554	5.50662	1.06747	0.312266	7	99691616	99691697	-	MI0000734	ENSG00000208036
TAAAGTGCTGACAGTGCAGATAGTGGTCCTCTCCG	35	hsa-mir-106b	12	46	F	1	1	0	0	0	1	0	0	0.333333	0.333333	0	0	0.266867	1.24906	7	99691616	99691697	-	MI0000734	ENSG00000208036
AAAGTGCTGACAGTGCAGAT	20	hsa-mir-106b	13	32	F	1	1	0	0	0	0	1	0	0.333333	0.333333	0	0	0.266867	1.24906	7	99691616	99691697	-	MI0000734	ENSG00000208036
CCGCACTGTGGGTACTT	17	hsa-mir-106b	52	68	F	0	0	1	0	0	1	0	0	0.333333	0.333333	0	0	0.266867	1.24906	7	99691616	99691697	-	MI0000734	ENSG00000208036
CCGCACTGTGGGTAC	15	hsa-mir-106b	52	66	F	1	1	0	0	0	0	1	2	0.333333	0.333333	1.83554	5.50662	0.266867	1.24906	7	99691616	99691697	-	MI0000734	ENSG00000208036
GTGCTACCGCACTGTGGGTACTTGCTGCT	29	hsa-mir-106b	46	74	F	0	0	0	1	0	0	0	0	0.166667	0.333333	0	0	0	#DIV/0!	7	99691616	99691697	-	MI0000734	ENSG00000208036
CGCACTGTGGGTACTTGCTGC	21	hsa-mir-106b	53	73	F	0	0	0	0	0	0	1	0	0.166667	0.333333	0	0	0	#DIV/0!	7	99691616	99691697	-	MI0000734	ENSG00000208036
TACCGCACTGTGGGTA	16	hsa-mir-106b	50	65	F	0	0	0	0	0	0	1	0	0.166667	0.333333	0	0	0	#DIV/0!	7	99691616	99691697	-	MI0000734	ENSG00000208036
CGCACTGTGGGTACTTGCTGCT	22	hsa-mir-106b	53	74	F	0	0	0	0	2	0	0	0	0.333333	0	0	#DIV/0!	0.533733	0	7	99691616	99691697	-	MI0000734	ENSG00000208036
CGCACTGTGGGTACTTGCTG	20	hsa-mir-106b	53	72	F	1	2	0	0	0	0	0	1	0.333333	0	0.91777	#DIV/0!	0.533733	0	7	99691616	99691697	-	MI0000734	ENSG00000208036
CGCACTGTGGGTACTTGC	18	hsa-mir-106b	53	70	F	0	0	2	0	0	0	0	0	0.333333	0	0	#DIV/0!	0.533733	0	7	99691616	99691697	-	MI0000734	ENSG00000208036
CTAAAGTGCTGACAGTGCAGATA	23	hsa-mir-106b	11	33	F	0	0	1	0	0	0	0	0	0.166667	0	0	#DIV/0!	0.266867	0	7	99691616	99691697	-	MI0000734	ENSG00000208036
CTACCGCACTGTGGGTACTTGCT	23	hsa-mir-106b	49	71	F	1	1	0	0	0	0	0	1	0.166667	0	0.91777	#DIV/0!	0.266867	0	7	99691616	99691697	-	MI0000734	ENSG00000208036
CTAAAGTGCTGACAGTGCAGAT	22	hsa-mir-106b	11	32	F	1	1	0	0	0	0	0	0	0.166667	0	0	#DIV/0!	0.266867	0	7	99691616	99691697	-	MI0000734	ENSG00000208036
AAAGTGCTGACAGTGCAGA	19	hsa-mir-106b	13	31	F	0	0	1	0	0	0	0	0	0.166667	0	0	#DIV/0!	0.266867	0	7	99691616	99691697	-	MI0000734	ENSG00000208036
ACCGCACTGTGGGTACTTG	19	hsa-mir-106b	51	69	F	0	0	0	0	1	0	0	0	0.166667	0	0	#DIV/0!	0.266867	0	7	99691616	99691697	-	MI0000734	ENSG00000208036
GCACTGTGGGTACTTGCT	18	hsa-mir-106b	54	71	F	0	0	0	0	0	0	0	1	0	0	0.91777	#DIV/0!	0	#DIV/0!	7	99691616	99691697	-	MI0000734	ENSG00000208036
CTGTGGGTACTTGCT	15	hsa-mir-106b	57	71	F	0	0	0	0	0	0	0	1	0	0	0.91777	#DIV/0!	0	#DIV/0!	7	99691616	99691697	-	MI0000734	ENSG00000208036
AGCAGCATTGTACAGGGCTAT	21	hsa-mir-107	50	70	F	5	46270	34735	41505	38535	36275	42940	54710	40043.3	40240	50211.2	1.24779	31901.2	1.26139	10	91352504	91352584	-	MI0000114	ENSG00000198997
AGCAGCATTGTACAGGGCTA	20	hsa-mir-107	50	69	F	5	21190	20620	23620	22055	17435	21810	26165	21121.7	20955	24013.5	1.14595	17043.4	1.22951	10	91352504	91352584	-	MI0000114	ENSG00000198997
AGCAGCATTGTACAGGGCT	19	hsa-mir-107	50	68	F	5	21655	14975	16135	15985	15250	22975	20125	17829.2	18120	18470.1	1.01932	14041.2	1.29049	10	91352504	91352584	-	MI0000114	ENSG00000198997
AGCAGCATTGTACAGGGC	18	hsa-mir-107	50	67	F	5	9170	7345	7015	7480	6605	7835	11390	7575	7151.67	10453.4	1.46167	6403.47	1.11684	10	91352504	91352584	-	MI0000114	ENSG00000198997
AGCAGCATTGTACAGGGCTATC	22	hsa-mir-107	50	71	F	1	4626	4449	5236	4968	4166	3128	6159	4428.83	4176.67	5652.55	1.35336	3747.61	1.11449	10	91352504	91352584	-	MI0000114	ENSG00000198997
AGCAGCATTGTACAGGGCTATCA	23	hsa-mir-107	50	72	F	1	1539	1379	1539	1416	1258	847	1721	1329.67	1214.67	1579.48	1.30034	1156.6	1.0502	10	91352504	91352584	-	MI0000114	ENSG00000198997
AGCAGCATTGTACAGGG	17	hsa-mir-107	50	66	F	5	360	260	200	290	290	270	530	278.333	253.333	486.418	1.92007	242.849	1.04317	10	91352504	91352584	-	MI0000114	ENSG00000198997
AGCAGCATTGTACAGG	16	hsa-mir-107	50	65	F	5	50	90	50	55	80	65	155	65	65	142.254	2.18853	52.039	1.24906	10	91352504	91352584	-	MI0000114	ENSG00000198997
CAGCATTGTACAGGGCTA	18	hsa-mir-107	52	69	F	5	70	25	75	65	20	95	40	58.3333	63.3333	36.7108	0.579644	42.6987	1.48326	10	91352504	91352584	-	MI0000114	ENSG00000198997
AGCAGCATTGTACAGGGCTATCAA	24	hsa-mir-107	50	73	F	1	48	36	50	50	48	16	60	41.3333	38	55.0662	1.44911	35.7601	1.06264	10	91352504	91352584	-	MI0000114	ENSG00000198997
CAGCATTGTACAGGGCTAT	19	hsa-mir-107	52	70	F	5	20	25	25	20	35	30	30	25.8333	30	27.5331	0.91777	17.3463	1.72947	10	91352504	91352584	-	MI0000114	ENSG00000198997
GCAGCATTGTACAGGGCTAT	20	hsa-mir-107	51	70	F	5	10	10	40	20	10	20	25	18.3333	23.3333	22.9443	0.983325	10.6747	2.18586	10	91352504	91352584	-	MI0000114	ENSG00000198997
AGCTTCTTTACAGTGTTGCCTTG	23	hsa-mir-107	13	35	F	1	23	19	40	23	20	7	44	22	22.3333	40.3819	1.80814	17.3463	1.2875	10	91352504	91352584	-	MI0000114	ENSG00000198997
AGCAGCATTGTACAG	15	hsa-mir-107	50	64	F	5	15	0	10	5	20	20	15	11.6667	16.6667	13.7665	0.825993	5.33733	3.12266	10	91352504	91352584	-	MI0000114	ENSG00000198997
CAGCATTGTACAGGGC	16	hsa-mir-107	52	67	F	0	0	10	20	20	10	15	15	12.5	15	13.7665	0.91777	8.006	1.87359	10	91352504	91352584	-	MI0000114	ENSG00000198997
GCAGCATTGTACAGGGCT	18	hsa-mir-107	51	68	F	5	25	5	20	20	5	10	0	14.1667	11.6667	0	0	13.3433	0.874344	10	91352504	91352584	-	MI0000114	ENSG00000198997
AGCTTCTTTACAGTGTTGCCT	21	hsa-mir-107	13	33	F	1	1	6	11	19	15	9	17	10.1667	11.6667	15.6021	1.33732	6.93853	1.68143	10	91352504	91352584	-	MI0000114	ENSG00000198997
ATTGTACAGGGCTAT	15	hsa-mir-107	56	70	F	5	25	10	5	0	10	15	5	10.8333	10	4.58885	0.458885	9.34033	1.07063	10	91352504	91352584	-	MI0000114	ENSG00000198997
AGCATTGTACAGGGCTAT	18	hsa-mir-107	53	70	F	5	20	5	5	15	10	10	5	10.8333	8.33333	4.58885	0.550662	10.6747	0.780665	10	91352504	91352584	-	MI0000114	ENSG00000198997
CAGCATTGTACAGGGCT	17	hsa-mir-107	52	68	F	5	10	0	15	25	0	10	15	10	8.33333	13.7665	1.65199	9.34033	0.892188	10	91352504	91352584	-	MI0000114	ENSG00000198997
GCAGCATTGTACAGGGCTA	19	hsa-mir-107	51	69	F	5	20	10	10	10	0	10	10	10	6.66667	9.1777	1.37665	10.6747	0.624532	10	91352504	91352584	-	MI0000114	ENSG00000198997
AAGCAGCATTGTACAGGGCTAT	22	hsa-mir-107	49	70	F	5	5	0	0	25	5	10	15	7.5	5	13.7665	2.75331	8.006	0.624532	10	91352504	91352584	-	MI0000114	ENSG00000198997
GCAGCATTGTACAGGGC	17	hsa-mir-107	51	67	F	5	5	0	0	5	5	10	5	4.16667	5	4.58885	0.91777	2.66867	1.87359	10	91352504	91352584	-	MI0000114	ENSG00000198997
GCATTGTACAGGGCTAT	17	hsa-mir-107	54	70	F	5	5	5	10	0	5	0	0	4.16667	5	0	0	2.66867	1.87359	10	91352504	91352584	-	MI0000114	ENSG00000198997
AGCATTGTACAGGGCTA	17	hsa-mir-107	53	69	F	5	15	0	0	10	10	0	0	5.83333	3.33333	0	0	6.67167	0.499625	10	91352504	91352584	-	MI0000114	ENSG00000198997
AAGCAGCATTGTACAGGGCT	20	hsa-mir-107	49	68	F	5	10	0	0	0	5	5	0	3.33333	3.33333	0	0	2.66867	1.24906	10	91352504	91352584	-	MI0000114	ENSG00000198997
GCATTGTACAGGGCT	15	hsa-mir-107	54	68	F	0	0	0	5	10	0	5	0	3.33333	3.33333	0	0	2.66867	1.24906	10	91352504	91352584	-	MI0000114	ENSG00000198997
AGCATTGTACAGGGCT	16	hsa-mir-107	53	68	F	0	0	0	5	0	0	5	20	1.66667	3.33333	18.3554	5.50662	0	#DIV/0!	10	91352504	91352584	-	MI0000114	ENSG00000198997
CATTGTACAGGGCTA	15	hsa-mir-107	55	69	F	0	0	0	0	0	0	10	0	1.66667	3.33333	0	0	0	#DIV/0!	10	91352504	91352584	-	MI0000114	ENSG00000198997
AGCTTCTTTACAGTGTTGCCTTGT	24	hsa-mir-107	13	36	F	1	1	7	4	3	4	1	6	3.33333	3	5.50662	1.83554	2.93553	1.02196	10	91352504	91352584	-	MI0000114	ENSG00000198997
ATTGTACAGGGCTATC	16	hsa-mir-107	56	71	F	1	4	2	3	3	0	5	11	2.83333	2.66667	10.0955	3.7858	2.4018	1.11028	10	91352504	91352584	-	MI0000114	ENSG00000198997
AGCTTCTTTACAGTGTTGCCTT	22	hsa-mir-107	13	34	F	1	5	6	2	0	4	1	4	3	2.33333	3.67108	1.57332	2.93553	0.794858	10	91352504	91352584	-	MI0000114	ENSG00000198997
GCAGCATTGTACAGGGCTATC	21	hsa-mir-107	51	71	F	1	1	0	3	1	2	2	0	1.5	2.33333	0	0	0.533733	4.37172	10	91352504	91352584	-	MI0000114	ENSG00000198997
AGCATTGTACAGGGC	15	hsa-mir-107	53	67	F	0	0	5	0	5	0	5	0	2.5	1.66667	0	0	2.66867	0.624532	10	91352504	91352584	-	MI0000114	ENSG00000198997
CAGCATTGTACAGGGCTATC	20	hsa-mir-107	52	71	F	1	1	2	3	1	1	0	2	1.33333	1.33333	1.83554	1.37665	1.06747	1.24906	10	91352504	91352584	-	MI0000114	ENSG00000198997
ATTGTACAGGGCTATCA	17	hsa-mir-107	56	72	F	1	2	0	2	2	0	2	2	1.33333	1.33333	1.83554	1.37665	1.06747	1.24906	10	91352504	91352584	-	MI0000114	ENSG00000198997
TTGTACAGGGCTATC	15	hsa-mir-107	57	71	F	1	1	0	1	1	1	2	1	1	1.33333	0.91777	0.688327	0.533733	2.49813	10	91352504	91352584	-	MI0000114	ENSG00000198997
AGCAGCATTGTACAGGGCTATCAAA	25	hsa-mir-107	50	74	F	1	4	2	0	1	2	0	1	1.5	0.666667	0.91777	1.37665	1.86807	0.356875	10	91352504	91352584	-	MI0000114	ENSG00000198997
AGCATTGTACAGGGCTATC	19	hsa-mir-107	53	71	F	1	1	1	0	0	1	1	4	0.666667	0.666667	3.67108	5.50662	0.533733	1.24906	10	91352504	91352584	-	MI0000114	ENSG00000198997
CATTGTACAGGGCTATCA	18	hsa-mir-107	55	72	F	0	0	1	0	0	0	2	0	0.5	0.666667	0	0	0.266867	2.49813	10	91352504	91352584	-	MI0000114	ENSG00000198997
TTTACAGTGTTGCCTTG	17	hsa-mir-107	19	35	F	0	0	0	0	0	1	1	0	0.333333	0.666667	0	0	0	#DIV/0!	10	91352504	91352584	-	MI0000114	ENSG00000198997
AGCATTGTACAGGGCTATCA	20	hsa-mir-107	53	72	F	0	0	1	0	0	0	1	1	0.333333	0.333333	0.91777	2.75331	0.266867	1.24906	10	91352504	91352584	-	MI0000114	ENSG00000198997
GCATTGTACAGGGCTATC	18	hsa-mir-107	54	71	F	0	0	1	1	0	0	0	0	0.333333	0.333333	0	0	0.266867	1.24906	10	91352504	91352584	-	MI0000114	ENSG00000198997
CATTGTACAGGGCTATC	17	hsa-mir-107	55	71	F	1	1	0	0	0	1	0	0	0.333333	0.333333	0	0	0.266867	1.24906	10	91352504	91352584	-	MI0000114	ENSG00000198997
TTGTACAGGGCTATCA	16	hsa-mir-107	57	72	F	0	0	0	0	1	0	1	0	0.333333	0.333333	0	0	0.266867	1.24906	10	91352504	91352584	-	MI0000114	ENSG00000198997
AAGCAGCATTGTACAGGGCTATC	23	hsa-mir-107	49	71	F	0	0	0	0	0	1	0	0	0.166667	0.333333	0	0	0	#DIV/0!	10	91352504	91352584	-	MI0000114	ENSG00000198997
ATTGTACAGGGCTATCAA	18	hsa-mir-107	56	73	F	0	0	0	1	0	0	0	0	0.166667	0.333333	0	0	0	#DIV/0!	10	91352504	91352584	-	MI0000114	ENSG00000198997
TGTACAGGGCTATCA	15	hsa-mir-107	58	72	F	0	0	0	1	0	0	0	0	0.166667	0.333333	0	0	0	#DIV/0!	10	91352504	91352584	-	MI0000114	ENSG00000198997
GCATTGTACAGGGCTA	16	hsa-mir-107	54	69	F	5	5	0	0	10	0	0	0	2.5	0	0	#DIV/0!	4.003	0	10	91352504	91352584	-	MI0000114	ENSG00000198997
AAGCAGCATTGTACAGGGC	19	hsa-mir-107	49	67	F	0	0	0	0	5	0	0	0	0.833333	0	0	#DIV/0!	1.33433	0	10	91352504	91352584	-	MI0000114	ENSG00000198997
CAGCTTCTTTACAGTGTTGCCT	22	hsa-mir-107	12	33	F	1	1	0	0	2	0	0	3	0.5	0	2.75331	#DIV/0!	0.8006	0	10	91352504	91352584	-	MI0000114	ENSG00000198997
TCAGCTTCTTTACAGTGTTGCCT	23	hsa-mir-107	11	33	F	0	0	2	0	0	0	0	0	0.333333	0	0	#DIV/0!	0.533733	0	10	91352504	91352584	-	MI0000114	ENSG00000198997
GCAGCATTGTACAGGGCTATCA	22	hsa-mir-107	51	72	F	1	2	0	0	0	0	0	0	0.333333	0	0	#DIV/0!	0.533733	0	10	91352504	91352584	-	MI0000114	ENSG00000198997
CAGCATTGTACAGGGCTATCA	21	hsa-mir-107	52	72	F	0	0	0	0	2	0	0	0	0.333333	0	0	#DIV/0!	0.533733	0	10	91352504	91352584	-	MI0000114	ENSG00000198997
CAGCTTCTTTACAGTGTTGCCTT	23	hsa-mir-107	12	34	F	0	0	1	0	0	0	0	0	0.166667	0	0	#DIV/0!	0.266867	0	10	91352504	91352584	-	MI0000114	ENSG00000198997
AGCTTCTTTACAGTGTTGCC	20	hsa-mir-107	13	32	F	0	0	0	0	1	0	0	0	0.166667	0	0	#DIV/0!	0.266867	0	10	91352504	91352584	-	MI0000114	ENSG00000198997
AAGCAGCATTGTACAGGGCTA	21	hsa-mir-107	49	69	F	0	0	0	0	0	0	0	5	0	0	4.58885	#DIV/0!	0	#DIV/0!	10	91352504	91352584	-	MI0000114	ENSG00000198997
AGCATTGTACAGGGCTATCAA	21	hsa-mir-107	53	73	F	0	0	0	0	0	0	0	1	0	0	0.91777	#DIV/0!	0	#DIV/0!	10	91352504	91352584	-	MI0000114	ENSG00000198997
AGCTTCTTTACAGTGTTGC	19	hsa-mir-107	13	31	F	0	0	0	0	0	0	0	1	0	0	0.91777	#DIV/0!	0	#DIV/0!	10	91352504	91352584	-	MI0000114	ENSG00000198997
CATTGTACAGGGCTAT	16	hsa-mir-107	55	70	F	0	0	0	0	0	0	0	5	0	0	4.58885	#DIV/0!	0	#DIV/0!	10	91352504	91352584	-	MI0000114	ENSG00000198997
CAGCATTGTACAGGG	15	hsa-mir-107	52	66	F	0	0	0	0	0	0	0	15	0	0	13.7665	#DIV/0!	0	#DIV/0!	10	91352504	91352584	-	MI0000114	ENSG00000198997
TACCCTGTAGATCCGAATTTGT	22	hsa-mir-10a	22	43	F	1	1509	1291	1902	2746	12008	577	1107	3338.83	4829	1015.97	0.21039	1480.04	3.26274	17	46657200	46657309	-	MI0000266	ENSG00000207777		similar expression in mouse and man but pos syn enrichment in mouse but very low in man!
TACCCTGTAGATCCGAATTTG	21	hsa-mir-10a	22	42	F	1	170	103	164	283	2183	51	188	492.333	799.333	172.541	0.215856	148.378	5.38715	17	46657200	46657309	-	MI0000266	ENSG00000207777
TACCCTGTAGATCCGAATTTGTG	23	hsa-mir-10a	22	44	F	1	257	144	235	326	1840	72	132	479	715.667	121.146	0.169277	194.012	3.68877	17	46657200	46657309	-	MI0000266	ENSG00000207777
ACCCTGTAGATCCGAATTTGT	21	hsa-mir-10a	23	43	F	1	160	112	180	238	1072	52	146	302.333	434.667	133.994	0.308269	136.102	3.19368	17	46657200	46657309	-	MI0000266	ENSG00000207777
ACCCTGTAGATCCGAATTTGTG	22	hsa-mir-10a	23	44	F	1	140	94	141	198	1047	25	107	274.167	404.333	98.2014	0.242872	115.286	3.50721	17	46657200	46657309	-	MI0000266	ENSG00000207777
TACCCTGTAGATCCGAATTTGTGT	24	hsa-mir-10a	22	45	F	1	75	82	81	124	362	33	41	126.167	158.667	37.6286	0.237155	74.9895	2.11585	17	46657200	46657309	-	MI0000266	ENSG00000207777
TACCCTGTAGATCCGAATTT	20	hsa-mir-10a	22	41	F	1	29	26	42	54	404	11	46	94.3333	152.333	42.2174	0.277138	29.0885	5.2369	17	46657200	46657309	-	MI0000266	ENSG00000207777
ACCCTGTAGATCCGAATTTG	20	hsa-mir-10a	23	42	F	1	28	18	37	66	343	12	55	84	130.667	50.4774	0.386306	29.8891	4.37172	17	46657200	46657309	-	MI0000266	ENSG00000207777
ACCCTGTAGATCCGAATTTGTGT	23	hsa-mir-10a	23	45	F	1	34	44	63	72	176	22	35	68.5	87	32.1219	0.369218	40.03	2.17337	17	46657200	46657309	-	MI0000266	ENSG00000207777
TACCCTGTAGATCCGAATT	19	hsa-mir-10a	22	40	F	1	16	13	38	66	213	9	37	59.1667	86.6667	33.9575	0.391817	25.3523	3.41849	17	46657200	46657309	-	MI0000266	ENSG00000207777
ACCCTGTAGATCCGAATTT	19	hsa-mir-10a	23	41	F	1	8	4	5	5	47	3	10	12	18.3333	9.1777	0.500602	4.53673	4.04109	17	46657200	46657309	-	MI0000266	ENSG00000207777
ATACCCTGTAGATCCGAATTTGT	23	hsa-mir-10a	21	43	F	1	10	4	9	9	40	3	7	12.5	17.3333	6.42439	0.370638	6.13793	2.82397	17	46657200	46657309	-	MI0000266	ENSG00000207777
TACCCTGTAGATCCGAAT	18	hsa-mir-10a	22	39	F	1	5	8	7	8	40	4	6	12	17	5.50662	0.323919	5.6042	3.03344	17	46657200	46657309	-	MI0000266	ENSG00000207777
ACCCTGTAGATCCGAATT	18	hsa-mir-10a	23	40	F	1	1	3	6	9	26	3	5	8	11.6667	4.58885	0.39333	3.46927	3.36286	17	46657200	46657309	-	MI0000266	ENSG00000207777
ATACCCTGTAGATCCGAATTTG	22	hsa-mir-10a	21	42	F	1	2	1	2	2	26	2	2	5.83333	10	1.83554	0.183554	1.33433	7.49438	17	46657200	46657309	-	MI0000266	ENSG00000207777
CCCTGTAGATCCGAATTTGT	20	hsa-mir-10a	24	43	F	0	0	1	2	1	8	0	0	2	3.33333	0	0	0.533733	6.24532	17	46657200	46657309	-	MI0000266	ENSG00000207777
TACCCTGTAGATCCGAA	17	hsa-mir-10a	22	38	F	0	0	3	1	1	8	0	2	2.16667	3	1.83554	0.611847	1.06747	2.81039	17	46657200	46657309	-	MI0000266	ENSG00000207777
CCTGTAGATCCGAATTTGT	19	hsa-mir-10a	25	43	F	0	0	0	0	0	6	1	0	1.16667	2.33333	0	0	0	#DIV/0!	17	46657200	46657309	-	MI0000266	ENSG00000207777
TGTAGATCCGAATTTGT	17	hsa-mir-10a	27	43	F	0	0	0	1	2	4	0	0	1.16667	1.66667	0	0	0.533733	3.12266	17	46657200	46657309	-	MI0000266	ENSG00000207777
TACCCTGTAGATCCGAATTTGTGTA	25	hsa-mir-10a	22	46	F	0	0	0	1	0	4	0	0	0.833333	1.66667	0	0	0	#DIV/0!	17	46657200	46657309	-	MI0000266	ENSG00000207777
CCCTGTAGATCCGAATTTGTGT	22	hsa-mir-10a	24	45	F	0	0	0	2	1	2	0	0	0.833333	1.33333	0	0	0.266867	4.99625	17	46657200	46657309	-	MI0000266	ENSG00000207777
ACCCTGTAGATCCGAATTTGTGTA	24	hsa-mir-10a	23	46	F	0	0	0	0	0	3	0	0	0.5	1	0	0	0	#DIV/0!	17	46657200	46657309	-	MI0000266	ENSG00000207777
ACCCTGTAGATCCGAAT	17	hsa-mir-10a	23	39	F	0	0	1	0	2	1	1	1	0.833333	0.666667	0.91777	1.37665	0.8006	0.832709	17	46657200	46657309	-	MI0000266	ENSG00000207777
ACCCTGTAGATCCGAA	16	hsa-mir-10a	23	38	F	0	0	0	0	1	2	0	0	0.5	0.666667	0	0	0.266867	2.49813	17	46657200	46657309	-	MI0000266	ENSG00000207777
CAAATTCGTATCTAGGGGAAT	21	hsa-mir-10a	63	83	F	0	0	0	1	0	1	0	0	0.333333	0.666667	0	0	0	#DIV/0!	17	46657200	46657309	-	MI0000266	ENSG00000207777
ATACCCTGTAGATCCGAATT	20	hsa-mir-10a	21	40	F	0	0	0	0	0	2	0	1	0.333333	0.666667	0.91777	1.37665	0	#DIV/0!	17	46657200	46657309	-	MI0000266	ENSG00000207777
ACCCTGTAGATCCGA	15	hsa-mir-10a	23	37	F	0	0	2	1	0	0	0	0	0.5	0.333333	0	0	0.533733	0.624532	17	46657200	46657309	-	MI0000266	ENSG00000207777
ATACCCTGTAGATCCGAATTT	21	hsa-mir-10a	21	41	F	0	0	0	0	1	1	0	0	0.333333	0.333333	0	0	0.266867	1.24906	17	46657200	46657309	-	MI0000266	ENSG00000207777
ATACCCTGTAGATCCGAAT	19	hsa-mir-10a	21	39	F	0	0	0	0	1	0	1	0	0.333333	0.333333	0	0	0.266867	1.24906	17	46657200	46657309	-	MI0000266	ENSG00000207777
ATACCCTGTAGATCCGAATTTGTGT	25	hsa-mir-10a	21	45	F	0	0	0	0	0	1	0	0	0.166667	0.333333	0	0	0	#DIV/0!	17	46657200	46657309	-	MI0000266	ENSG00000207777
ATACCCTGTAGATCCGAATTTGTG	24	hsa-mir-10a	21	44	F	0	0	0	1	0	0	0	0	0.166667	0.333333	0	0	0	#DIV/0!	17	46657200	46657309	-	MI0000266	ENSG00000207777
CCCTGTAGATCCGAATTTGTGTA	23	hsa-mir-10a	24	46	F	0	0	0	0	0	1	0	0	0.166667	0.333333	0	0	0	#DIV/0!	17	46657200	46657309	-	MI0000266	ENSG00000207777
AAATTCGTATCTAGGGGAAT	20	hsa-mir-10a	64	83	F	0	0	0	0	0	1	0	0	0.166667	0.333333	0	0	0	#DIV/0!	17	46657200	46657309	-	MI0000266	ENSG00000207777
GTAGATCCGAATTTGT	16	hsa-mir-10a	28	43	F	0	0	0	1	0	0	0	0	0.166667	0.333333	0	0	0	#DIV/0!	17	46657200	46657309	-	MI0000266	ENSG00000207777
TACCCTGTAGATCCGA	16	hsa-mir-10a	22	37	F	0	0	2	0	0	0	0	0	0.333333	0	0	#DIV/0!	0.533733	0	17	46657200	46657309	-	MI0000266	ENSG00000207777
CCTGTAGATCCGAATTTGTGT	21	hsa-mir-10a	25	45	F	0	0	0	0	1	0	0	0	0.166667	0	0	#DIV/0!	0.266867	0	17	46657200	46657309	-	MI0000266	ENSG00000207777
ATCTGTCTGTCTTCTGTATA	20	hsa-mir-10a	2	21	F	1	1	0	0	0	0	0	0	0.166667	0	0	#DIV/0!	0.266867	0	17	46657200	46657309	-	MI0000266	ENSG00000207777
CCCTGTAGATCCGAATTT	18	hsa-mir-10a	24	41	F	1	1	0	0	0	0	0	0	0.166667	0	0	#DIV/0!	0.266867	0	17	46657200	46657309	-	MI0000266	ENSG00000207777
GTAGATCCGAATTTG	15	hsa-mir-10a	28	42	F	1	1	0	0	0	0	0	0	0.166667	0	0	#DIV/0!	0.266867	0	17	46657200	46657309	-	MI0000266	ENSG00000207777
TACCCTGTAGAACCGAATTTGT	22	hsa-mir-10b	27	48	F	1	5350	2290	4139	2748	1424	515	953	2744.33	2026	874.635	0.431705	2772.21	0.730825	2	177015031	177015140	+	MI0000267	ENSG00000207744
TACCCTGTAGAACCGAATTTGTG	23	hsa-mir-10b	27	49	F	1	457	108	280	147	108	31	59	188.5	139.667	54.1484	0.387698	190.009	0.735053	2	177015031	177015140	+	MI0000267	ENSG00000207744
TACCCTGTAGAACCGAATTTG	21	hsa-mir-10b	27	47	F	1	120	43	326	106	34	14	32	107.167	124.667	29.3686	0.235577	71.7871	1.73662	2	177015031	177015140	+	MI0000267	ENSG00000207744
ACCCTGTAGAACCGAATTTGT	21	hsa-mir-10b	28	48	F	1	177	104	220	118	53	32	44	117.333	101.667	40.3819	0.397199	106.48	0.954798	2	177015031	177015140	+	MI0000267	ENSG00000207744
ACCCTGTAGAACCGAATTTGTGT	23	hsa-mir-10b	28	50	F	1	130	51	99	69	39	10	45	66.3333	49.3333	41.2996	0.837155	66.7167	0.739445	2	177015031	177015140	+	MI0000267	ENSG00000207744
ACCCTGTAGAACCGAATTTGTG	22	hsa-mir-10b	28	49	F	1	130	30	88	49	26	7	22	55	40.3333	20.1909	0.500602	55.7751	0.723142	2	177015031	177015140	+	MI0000267	ENSG00000207744
TACCCTGTAGAACCGAATT	19	hsa-mir-10b	27	45	F	1	30	26	65	38	10	13	14	30.3333	29.3333	12.8488	0.438027	25.0855	1.16934	2	177015031	177015140	+	MI0000267	ENSG00000207744
TACCCTGTAGAACCGAATTT	20	hsa-mir-10b	27	46	F	1	30	4	67	26	4	3	7	22.3333	24.6667	6.42439	0.260448	16.012	1.54051	2	177015031	177015140	+	MI0000267	ENSG00000207744
TACCCTGTAGAACCGAATTTGTGT	24	hsa-mir-10b	27	50	F	1	81	37	35	35	15	3	11	34.3333	17.6667	10.0955	0.571442	40.8306	0.432682	2	177015031	177015140	+	MI0000267	ENSG00000207744
ACCCTGTAGAACCGAATTTG	20	hsa-mir-10b	28	47	F	1	7	7	34	6	2	2	5	9.66667	12.6667	4.58885	0.362278	5.33733	2.37322	2	177015031	177015140	+	MI0000267	ENSG00000207744
TACCCTGTAGAACCGAAT	18	hsa-mir-10b	27	44	F	1	7	10	21	10	3	5	4	9.33333	9.66667	3.67108	0.379767	7.2054	1.34159	2	177015031	177015140	+	MI0000267	ENSG00000207744
ACCCTGTAGAACCGAATTT	19	hsa-mir-10b	28	46	F	1	1	0	8	2	0	2	4	2.16667	3.33333	3.67108	1.10132	0.8006	4.16354	2	177015031	177015140	+	MI0000267	ENSG00000207744
ACCCTGTAGAACCGAATT	18	hsa-mir-10b	28	45	F	1	3	4	8	2	1	0	9	3	3	8.25993	2.75331	2.4018	1.24906	2	177015031	177015140	+	MI0000267	ENSG00000207744
CCTGTAGAACCGAATTTGT	19	hsa-mir-10b	30	48	F	1	1	2	5	2	1	0	2	1.83333	2	1.83554	0.91777	1.33433	1.49888	2	177015031	177015140	+	MI0000267	ENSG00000207744
ACCCTGTAGAACCGAAT	17	hsa-mir-10b	28	44	F	0	0	0	2	0	0	0	1	0.333333	0.666667	0.91777	1.37665	0	#DIV/0!	2	177015031	177015140	+	MI0000267	ENSG00000207744
AGATTCGATTCTAGGGGAAT	20	hsa-mir-10b	68	87	F	0	0	1	1	0	0	0	0	0.333333	0.333333	0	0	0.266867	1.24906	2	177015031	177015140	+	MI0000267	ENSG00000207744
CTGTAGAACCGAATTTGT	18	hsa-mir-10b	31	48	F	1	1	0	1	0	0	0	0	0.333333	0.333333	0	0	0.266867	1.24906	2	177015031	177015140	+	MI0000267	ENSG00000207744
TACCCTGTAGAACCGA	16	hsa-mir-10b	27	42	F	0	0	0	1	1	0	0	0	0.333333	0.333333	0	0	0.266867	1.24906	2	177015031	177015140	+	MI0000267	ENSG00000207744
ACCCTGTAGAACCGAATTTGTGTG	24	hsa-mir-10b	28	51	F	0	0	0	0	0	0	1	0	0.166667	0.333333	0	0	0	#DIV/0!	2	177015031	177015140	+	MI0000267	ENSG00000207744
ATACCCTGTAGAACCGAATTTG	22	hsa-mir-10b	26	47	F	0	0	0	0	0	1	0	0	0.166667	0.333333	0	0	0	#DIV/0!	2	177015031	177015140	+	MI0000267	ENSG00000207744
CAGATTCGATTCTAGGGGAAT	21	hsa-mir-10b	67	87	F	0	0	0	1	0	0	0	0	0.166667	0.333333	0	0	0	#DIV/0!	2	177015031	177015140	+	MI0000267	ENSG00000207744
CAGATTCGATTCTAGGGGA	19	hsa-mir-10b	67	85	F	0	0	0	0	0	1	0	0	0.166667	0.333333	0	0	0	#DIV/0!	2	177015031	177015140	+	MI0000267	ENSG00000207744
TACCCTGTAGAACCGAA	17	hsa-mir-10b	27	43	F	0	0	0	1	0	0	0	1	0.166667	0.333333	0.91777	2.75331	0	#DIV/0!	2	177015031	177015140	+	MI0000267	ENSG00000207744
TACCCTGTAGAACCGAATTTGTGTG	25	hsa-mir-10b	27	51	F	1	2	0	0	0	0	0	0	0.333333	0	0	#DIV/0!	0.533733	0	2	177015031	177015140	+	MI0000267	ENSG00000207744
TACCCTGTAGAACCGAATTTGTGTGGT	27	hsa-mir-10b	27	53	F	1	1	0	0	0	0	0	0	0.166667	0	0	#DIV/0!	0.266867	0	2	177015031	177015140	+	MI0000267	ENSG00000207744
CACAGATTCGATTCTAGGGGAATA	24	hsa-mir-10b	65	88	F	0	0	0	0	1	0	0	0	0.166667	0	0	#DIV/0!	0.266867	0	2	177015031	177015140	+	MI0000267	ENSG00000207744
ATACCCTGTAGAACCGAATTTGT	23	hsa-mir-10b	26	48	F	0	0	1	0	0	0	0	1	0.166667	0	0.91777	#DIV/0!	0.266867	0	2	177015031	177015140	+	MI0000267	ENSG00000207744
ACAGATTCGATTCTAGGGGAAT	22	hsa-mir-10b	66	87	F	0	0	0	0	1	0	0	0	0.166667	0	0	#DIV/0!	0.266867	0	2	177015031	177015140	+	MI0000267	ENSG00000207744
ACCCTGTAGAACCGAA	16	hsa-mir-10b	28	43	F	0	0	1	0	0	0	0	0	0.166667	0	0	#DIV/0!	0.266867	0	2	177015031	177015140	+	MI0000267	ENSG00000207744
TACCCTGTAGAACCG	15	hsa-mir-10b	27	41	F	0	0	0	0	1	0	0	0	0.166667	0	0	#DIV/0!	0.266867	0	2	177015031	177015140	+	MI0000267	ENSG00000207744
TGGAATGTAAAGAAGTATGTAT	22	hsa-mir-1-1	46	67	F	2	280	116	316	316	244	102	268	229	220.667	245.962	1.11463	190.009	1.16135	20	61151513	61151583	+	MI0000651
TGGAATGTAAAGAAGTATGT	20	hsa-mir-1-1	46	65	F	2	30	36	44	46	22	6	22	30.6667	24	20.1909	0.841289	29.8891	0.802969	20	61151513	61151583	+	MI0000651
TGGAATGTAAAGAAGTATGTA	21	hsa-mir-1-1	46	66	F	2	26	22	30	20	12	4	2	19	15.3333	1.83554	0.119709	18.1469	0.844955	20	61151513	61151583	+	MI0000651
TGGAATGTAAAGAAG	15	hsa-mir-1-1	46	60	F	0	0	0	2	0	2	0	0	0.666667	1.33333	0	0	0	#DIV/0!	20	61151513	61151583	+	MI0000651
TGGAATGTAAAGAAGTA	17	hsa-mir-1-1	46	62	F	2	2	2	2	0	0	0	0	1	0.666667	0	0	1.06747	0.624532	20	61151513	61151583	+	MI0000651
TGGAATGTAAAGAAGTATG	19	hsa-mir-1-1	46	64	F	2	2	0	0	0	0	2	0	0.666667	0.666667	0	0	0.533733	1.24906	20	61151513	61151583	+	MI0000651
GGAATGTAAAGAAGTATGTAT	21	hsa-mir-1-1	47	67	F	2	2	0	0	0	0	0	0	0.333333	0	0	#DIV/0!	0.533733	0	20	61151513	61151583	+	MI0000651
AATGTAAAGAAGTATGTAT	19	hsa-mir-1-1	49	67	F	2	2	0	0	0	0	0	0	0.333333	0	0	#DIV/0!	0.533733	0	20	61151513	61151583	+	MI0000651
TGGAATGTAAAGAAGTAT	18	hsa-mir-1-1	46	63	F	2	2	0	0	0	0	0	0	0.333333	0	0	#DIV/0!	0.533733	0	20	61151513	61151583	+	MI0000651
ACATACTTCTTTATATGCCCATA	23	hsa-mir-1-1	7	29	F	0	0	0	0	0	0	0	1	0	0	0.91777	#DIV/0!	0	#DIV/0!	20	61151513	61151583	+	MI0000651
TTGCTCACTGTTCTTCCCTAGA	22	hsa-mir-1178	56	77	F	0	0	0	1	0	0	0	0	0.166667	0.333333	0	0	0	#DIV/0!	12	120151439	120151529	-	MI0006271	ENSG00000221323
AAGGGTCCAGGGTCAGCTGAGCAT	24	hsa-mir-1178	23	46	F	1	2	0	0	0	0	0	0	0.333333	0	0	#DIV/0!	0.533733	0	12	120151439	120151529	-	MI0006271	ENSG00000221323
AGAAGCATTCTTTCATTGGTTG	22	hsa-mir-1179	13	34	F	1	95	120	166	118	113	84	171	116	121	156.939	1.29701	88.8666	1.36159	15	89151338	89151428	+	MI0006272	ENSG00000221630
AAGCATTCTTTCATTGGTTGGT	22	hsa-mir-1179	15	36	F	1	82	104	120	106	125	48	108	97.5	97.6667	99.1192	1.01487	77.9251	1.25334	15	89151338	89151428	+	MI0006272	ENSG00000221630
AGAAGCATTCTTTCATTGGTT	21	hsa-mir-1179	13	33	F	1	11	16	11	10	10	11	14	11.5	10.6667	12.8488	1.20457	9.87407	1.08027	15	89151338	89151428	+	MI0006272	ENSG00000221630
AAGCATTCTTTCATTGGTTG	20	hsa-mir-1179	15	34	F	1	1	16	13	21	10	5	14	11	9.33333	12.8488	1.37665	10.1409	0.920362	15	89151338	89151428	+	MI0006272	ENSG00000221630
AAGCATTCTTTCATTGGTTGG	21	hsa-mir-1179	15	35	F	1	4	10	7	5	7	6	7	6.5	6.66667	6.42439	0.963658	5.07047	1.3148	15	89151338	89151428	+	MI0006272	ENSG00000221630
AGAAGCATTCTTTCATTGGT	20	hsa-mir-1179	13	32	F	0	0	5	1	1	3	3	2	2.16667	2.33333	1.83554	0.78666	1.6012	1.45724	15	89151338	89151428	+	MI0006272	ENSG00000221630
AAGCATTCTTTCATTGGT	18	hsa-mir-1179	15	32	F	1	1	5	0	4	0	4	2	2.33333	1.33333	1.83554	1.37665	2.66867	0.499625	15	89151338	89151428	+	MI0006272	ENSG00000221630
GAAGCATTCTTTCATTGGTTG	21	hsa-mir-1179	14	34	F	1	1	1	0	2	3	0	1	1.16667	1	0.91777	0.91777	1.06747	0.936797	15	89151338	89151428	+	MI0006272	ENSG00000221630
AAGCATTCTTTCATTGGTT	19	hsa-mir-1179	15	33	F	1	1	1	0	0	0	3	1	0.833333	1	0.91777	0.91777	0.533733	1.87359	15	89151338	89151428	+	MI0006272	ENSG00000221630
ATTCTTTCATTGGTTG	16	hsa-mir-1179	19	34	F	0	0	0	0	0	1	0	1	0.166667	0.333333	0.91777	2.75331	0	#DIV/0!	15	89151338	89151428	+	MI0006272	ENSG00000221630
CTTTCATTGGTTGGT	15	hsa-mir-1179	22	36	F	0	0	0	1	0	0	0	0	0.166667	0.333333	0	0	0	#DIV/0!	15	89151338	89151428	+	MI0006272	ENSG00000221630
AGCATTCTTTCATTGGTTGGT	21	hsa-mir-1179	16	36	F	0	0	3	0	2	0	0	0	0.833333	0	0	#DIV/0!	1.33433	0	15	89151338	89151428	+	MI0006272	ENSG00000221630
AGAAGCATTCTTTCATTGGTTGG	23	hsa-mir-1179	13	35	F	0	0	0	0	3	0	0	0	0.5	0	0	#DIV/0!	0.8006	0	15	89151338	89151428	+	MI0006272	ENSG00000221630
CAACCAATAAGAGGATGCCATTT	23	hsa-mir-1179	51	73	F	1	1	0	0	1	0	0	0	0.333333	0	0	#DIV/0!	0.533733	0	15	89151338	89151428	+	MI0006272	ENSG00000221630
AGAAGCATTCTTTCATTGG	19	hsa-mir-1179	13	31	F	0	0	2	0	0	0	0	0	0.333333	0	0	#DIV/0!	0.533733	0	15	89151338	89151428	+	MI0006272	ENSG00000221630
AGAAGCATTCTTTCAT	16	hsa-mir-1179	13	28	F	1	2	0	0	0	0	0	1	0.333333	0	0.91777	#DIV/0!	0.533733	0	15	89151338	89151428	+	MI0006272	ENSG00000221630
AAGCATTCTTTCATTGGTTGGTGTGTATTGCCT	33	hsa-mir-1179	15	47	F	0	0	1	0	0	0	0	0	0.166667	0	0	#DIV/0!	0.266867	0	15	89151338	89151428	+	MI0006272	ENSG00000221630
GAAGCATTCTTTCATTGGTTGGT	23	hsa-mir-1179	14	36	F	1	1	0	0	0	0	0	0	0.166667	0	0	#DIV/0!	0.266867	0	15	89151338	89151428	+	MI0006272	ENSG00000221630
AGCATTCTTTCATTGGTTG	19	hsa-mir-1179	16	34	F	0	0	0	0	1	0	0	0	0.166667	0	0	#DIV/0!	0.266867	0	15	89151338	89151428	+	MI0006272	ENSG00000221630
GAAGCATTCTTTCATTGGT	19	hsa-mir-1179	14	32	F	0	0	0	0	1	0	0	0	0.166667	0	0	#DIV/0!	0.266867	0	15	89151338	89151428	+	MI0006272	ENSG00000221630
TTTCCGGCTCGCGTGGGTGTGT	22	hsa-mir-1180	41	62	F	1	1052	954	777	582	526	336	2381	704.5	546.333	2185.21	3.99977	690.651	0.791041	17	19247819	19247887	-	MI0006273	ENSG00000221540
TTTCCGGCTCGCGTGGGTGT	20	hsa-mir-1180	41	60	F	1	32	48	55	44	26	22	46	37.8333	34.3333	42.2174	1.22963	33.0915	1.03753	17	19247819	19247887	-	MI0006273	ENSG00000221540
TTTCCGGCTCGCGTGGGTGTG	21	hsa-mir-1180	41	61	F	1	17	25	35	16	6	6	46	17.5	15.6667	42.2174	2.69473	15.4783	1.01217	17	19247819	19247887	-	MI0006273	ENSG00000221540
TTTCCGGCTCGCGTGGGT	18	hsa-mir-1180	41	58	F	1	11	4	12	7	5	6	9	7.5	7.66667	8.25993	1.07738	5.87107	1.30584	17	19247819	19247887	-	MI0006273	ENSG00000221540
TTTCCGGCTCGCGTGGGTG	19	hsa-mir-1180	41	59	F	1	5	9	7	2	11	5	9	6.5	7.66667	8.25993	1.07738	4.26987	1.79553	17	19247819	19247887	-	MI0006273	ENSG00000221540
TTTCCGGCTCGCGTGGG	17	hsa-mir-1180	41	57	F	1	5	8	7	6	2	4	16	5.33333	4.33333	14.6843	3.38869	5.07047	0.854622	17	19247819	19247887	-	MI0006273	ENSG00000221540
GGACCCACCCGGCCGGGAAT	20	hsa-mir-1180	7	26	F	1	4	2	3	1	3	1	4	2.33333	2.33333	3.67108	1.57332	1.86807	1.24906	17	19247819	19247887	-	MI0006273	ENSG00000221540
TTTCCGGCTCGCGTGG	16	hsa-mir-1180	41	56	F	1	1	1	1	1	2	0	1	1	1	0.91777	0.91777	0.8006	1.24906	17	19247819	19247887	-	MI0006273	ENSG00000221540
TTCCGGCTCGCGTGGGTGTGT	21	hsa-mir-1180	42	62	F	1	1	0	0	0	1	1	0	0.5	0.666667	0	0	0.266867	2.49813	17	19247819	19247887	-	MI0006273	ENSG00000221540
TTTCCGGCTCGCGTG	15	hsa-mir-1180	41	55	F	0	0	0	0	1	1	1	1	0.5	0.666667	0.91777	1.37665	0.266867	2.49813	17	19247819	19247887	-	MI0006273	ENSG00000221540
GGACCCACCCGGCCGGGA	18	hsa-mir-1180	7	24	F	0	0	0	0	0	1	0	0	0.166667	0.333333	0	0	0	#DIV/0!	17	19247819	19247887	-	MI0006273	ENSG00000221540
GGACCCACCCGGCCGGGAA	19	hsa-mir-1180	7	25	F	0	0	1	0	1	0	0	0	0.333333	0	0	#DIV/0!	0.533733	0	17	19247819	19247887	-	MI0006273	ENSG00000221540
TTTCCGGCTCGCGTGGGTGTGTC	23	hsa-mir-1180	41	63	F	0	0	1	0	0	0	0	0	0.166667	0	0	#DIV/0!	0.266867	0	17	19247819	19247887	-	MI0006273	ENSG00000221540
GGACCCACCCGGCCGGGAATA	21	hsa-mir-1180	7	27	F	1	1	0	0	0	0	0	0	0.166667	0	0	#DIV/0!	0.266867	0	17	19247819	19247887	-	MI0006273	ENSG00000221540
TCCGGCTCGCGTGGGTGTG	19	hsa-mir-1180	43	61	F	1	1	0	0	0	0	0	0	0.166667	0	0	#DIV/0!	0.266867	0	17	19247819	19247887	-	MI0006273	ENSG00000221540
CTGGTTGTTTCCGGCTCG	18	hsa-mir-1180	34	51	F	0	0	0	0	0	0	0	2	0	0	1.83554	#DIV/0!	0	#DIV/0!	17	19247819	19247887	-	MI0006273	ENSG00000221540
GAGCCGGAGCGGGCTGGGCCGCCAAGG	27	hsa-mir-1181	29	55	F	0	0	0	0	0	1	0	0	0.166667	0.333333	0	0	0	#DIV/0!	19	10514134	10514214	-	MI0006274	ENSG00000221566
GCCGCCACCCGAGCCGGAGCGGGC	24	hsa-mir-1181	19	42	F	0	0	0	0	0	1	0	0	0.166667	0.333333	0	0	0	#DIV/0!	19	10514134	10514214	-	MI0006274	ENSG00000221566
CGAGCCGGAGCGGGCTGGGCCGC	23	hsa-mir-1181	28	50	F	0	0	0	0	0	1	0	0	0.166667	0.333333	0	0	0	#DIV/0!	19	10514134	10514214	-	MI0006274	ENSG00000221566
CGGAGCGGGCTGGGCCGCC	19	hsa-mir-1181	33	51	F	0	0	0	1	0	0	0	0	0.166667	0.333333	0	0	0	#DIV/0!	19	10514134	10514214	-	MI0006274	ENSG00000221566
CTGCCGCCGTCGCCGCCA	18	hsa-mir-1181	8	25	F	0	0	0	0	0	1	0	0	0.166667	0.333333	0	0	0	#DIV/0!	19	10514134	10514214	-	MI0006274	ENSG00000221566
GGCAAGATGGTGGAC	15	hsa-mir-1181	54	68	F	0	0	0	0	2	0	0	0	0.333333	0	0	#DIV/0!	0.533733	0	19	10514134	10514214	-	MI0006274	ENSG00000221566
AGGCAAGATGGTGGACTA	18	hsa-mir-1181	53	70	F	1	1	0	0	0	0	0	0	0.166667	0	0	#DIV/0!	0.266867	0	19	10514134	10514214	-	MI0006274	ENSG00000221566
GCTGCCGCCGTCGCC	15	hsa-mir-1181	7	21	F	0	0	0	0	1	0	0	0	0.166667	0	0	#DIV/0!	0.266867	0	19	10514134	10514214	-	MI0006274	ENSG00000221566
GGCCGCCAAGGCAAGATGGTGGACT	25	hsa-mir-1181	45	69	F	0	0	0	0	0	0	0	1	0	0	0.91777	#DIV/0!	0	#DIV/0!	19	10514134	10514214	-	MI0006274	ENSG00000221566
AGGCAAGATGGTGGAC	16	hsa-mir-1181	53	68	F	0	0	0	0	0	0	0	1	0	0	0.91777	#DIV/0!	0	#DIV/0!	19	10514134	10514214	-	MI0006274	ENSG00000221566
CGGCGACGGCGGCAGC	16	hsa-mir-1181	7	22	R	0	0	0	0	0	0	0	1	0	0	0.91777	#DIV/0!	0	#DIV/0!	19	10514134	10514214	-	MI0006274	ENSG00000221566
ACTGGATTCTGGAGTCCATCTAGAGGGTCTTGGGA	35	hsa-mir-1182	40	74	F	0	0	0	0	0	1	0	0	0.166667	0.333333	0	0	0	#DIV/0!	1	231155574	231155670	-	MI0006275	ENSG00000221290
ACTGGATTCTGGAGTCC	17	hsa-mir-1182	40	56	F	0	0	0	0	0	1	0	0	0.166667	0.333333	0	0	0	#DIV/0!	1	231155574	231155670	-	MI0006275	ENSG00000221290
AGCAGCGACTGGATTCTGGAGTCCATC	27	hsa-mir-1182	33	59	F	1	1	0	0	0	0	0	0	0.166667	0	0	#DIV/0!	0.266867	0	1	231155574	231155670	-	MI0006275	ENSG00000221290
CTGGAGAGGGAGGAGA	16	hsa-mir-1182	19	34	R	0	0	0	0	1	0	0	0	0.166667	0	0	#DIV/0!	0.266867	0	1	231155574	231155670	-	MI0006275	ENSG00000221290
GTGAGAGTGGGCATG	15	hsa-mir-1183	62	76	F	0	0	0	1	0	0	0	0	0.166667	0.333333	0	0	0	#DIV/0!	7	21510676	21510764	+	MI0006276	ENSG00000221783
GCATGGAGCAGGAGT	15	hsa-mir-1183	72	86	F	0	0	0	0	0	0	0	1	0	0	0.91777	#DIV/0!	0	#DIV/0!	7	21510676	21510764	+	MI0006276	ENSG00000221783
CTGTTGACTGCTGAGCAGAACCACCTCCTTCACC	34	hsa-mir-1184-1	13	46	R	0	0	0	0	0	3	0	0	0.5	1	0	0	0	#DIV/0!	X	154115635	154115733	-	MI0006277
AACCACCTCCTTCACCTCGTTCTGCAAG	28	hsa-mir-1184-1	1	28	R	0	0	0	0	0	3	0	0	0.5	1	0	0	0	#DIV/0!	X	154115635	154115733	-	MI0006277
TGGCCACTGTTGACTGCTGAGCAGAACC	28	hsa-mir-1184-1	25	52	R	0	0	0	3	0	0	0	0	0.5	1	0	0	0	#DIV/0!	X	154115635	154115733	-	MI0006277
TTGACTGCTGAGCAGAACC	19	hsa-mir-1184-1	25	43	R	0	0	0	3	0	0	0	0	0.5	1	0	0	0	#DIV/0!	X	154115635	154115733	-	MI0006277
TGCTGAGCAGAACCACCT	18	hsa-mir-1184-1	21	38	R	0	0	0	3	0	0	0	0	0.5	1	0	0	0	#DIV/0!	X	154115635	154115733	-	MI0006277
TGTGGCCACTGTTGACTGCTGAGCAGAACCA	31	hsa-mir-1184-1	24	54	R	3	6	0	0	0	0	0	0	1	0	0	#DIV/0!	1.6012	0	X	154115635	154115733	-	MI0006277
GATGTGGCCACTGTTGACTGCTGAGCAGAACCACC	35	hsa-mir-1184-1	22	56	R	3	3	0	0	0	0	0	0	0.5	0	0	#DIV/0!	0.8006	0	X	154115635	154115733	-	MI0006277
ACGGAAGCCATCAAGTCGCTGCAGGTGGAGATGT	34	hsa-mir-1184-1	52	85	R	3	3	0	0	0	0	0	0	0.5	0	0	#DIV/0!	0.8006	0	X	154115635	154115733	-	MI0006277
GCTGCAGGTGGAGATGTGGCCACTGTTGACTGC	33	hsa-mir-1184-1	36	68	R	0	0	3	0	0	0	0	0	0.5	0	0	#DIV/0!	0.8006	0	X	154115635	154115733	-	MI0006277
CTGTTGACTGCTGAGCAGAACCACCT	26	hsa-mir-1184-1	21	46	R	0	0	3	0	0	0	0	0	0.5	0	0	#DIV/0!	0.8006	0	X	154115635	154115733	-	MI0006277
TTGACTGCTGAGCAGAACCACCT	23	hsa-mir-1184-1	21	43	R	0	0	0	0	3	0	0	0	0.5	0	0	#DIV/0!	0.8006	0	X	154115635	154115733	-	MI0006277
CTGTTGACTGCTGAGCAGAACCACCTCCTTCACC	34	hsa-mir-1184-2	13	46	R	0	0	0	0	0	3	0	0	0.5	1	0	0	0	#DIV/0!	X	154612749	154612847	-	MI0015971
AACCACCTCCTTCACCTCGTTCTGCAAG	28	hsa-mir-1184-2	1	28	R	0	0	0	0	0	3	0	0	0.5	1	0	0	0	#DIV/0!	X	154612749	154612847	-	MI0015971
TGGCCACTGTTGACTGCTGAGCAGAACC	28	hsa-mir-1184-2	25	52	R	0	0	0	3	0	0	0	0	0.5	1	0	0	0	#DIV/0!	X	154612749	154612847	-	MI0015971
TTGACTGCTGAGCAGAACC	19	hsa-mir-1184-2	25	43	R	0	0	0	3	0	0	0	0	0.5	1	0	0	0	#DIV/0!	X	154612749	154612847	-	MI0015971
TGCTGAGCAGAACCACCT	18	hsa-mir-1184-2	21	38	R	0	0	0	3	0	0	0	0	0.5	1	0	0	0	#DIV/0!	X	154612749	154612847	-	MI0015971
TGTGGCCACTGTTGACTGCTGAGCAGAACCA	31	hsa-mir-1184-2	24	54	R	3	6	0	0	0	0	0	0	1	0	0	#DIV/0!	1.6012	0	X	154612749	154612847	-	MI0015971
GATGTGGCCACTGTTGACTGCTGAGCAGAACCACC	35	hsa-mir-1184-2	22	56	R	3	3	0	0	0	0	0	0	0.5	0	0	#DIV/0!	0.8006	0	X	154612749	154612847	-	MI0015971
ACGGAAGCCATCAAGTCGCTGCAGGTGGAGATGT	34	hsa-mir-1184-2	52	85	R	3	3	0	0	0	0	0	0	0.5	0	0	#DIV/0!	0.8006	0	X	154612749	154612847	-	MI0015971
GCTGCAGGTGGAGATGTGGCCACTGTTGACTGC	33	hsa-mir-1184-2	36	68	R	0	0	3	0	0	0	0	0	0.5	0	0	#DIV/0!	0.8006	0	X	154612749	154612847	-	MI0015971
CTGTTGACTGCTGAGCAGAACCACCT	26	hsa-mir-1184-2	21	46	R	0	0	3	0	0	0	0	0	0.5	0	0	#DIV/0!	0.8006	0	X	154612749	154612847	-	MI0015971
TTGACTGCTGAGCAGAACCACCT	23	hsa-mir-1184-2	21	43	R	0	0	0	0	3	0	0	0	0.5	0	0	#DIV/0!	0.8006	0	X	154612749	154612847	-	MI0015971
CTGTTGACTGCTGAGCAGAACCACCTCCTTCACC	34	hsa-mir-1184-3	13	46	R	0	0	0	0	0	3	0	0	0.5	1	0	0	0	#DIV/0!	X	154687178	154687276	+	MI0015972
AACCACCTCCTTCACCTCGTTCTGCAAG	28	hsa-mir-1184-3	1	28	R	0	0	0	0	0	3	0	0	0.5	1	0	0	0	#DIV/0!	X	154687178	154687276	+	MI0015972
TGGCCACTGTTGACTGCTGAGCAGAACC	28	hsa-mir-1184-3	25	52	R	0	0	0	3	0	0	0	0	0.5	1	0	0	0	#DIV/0!	X	154687178	154687276	+	MI0015972
TTGACTGCTGAGCAGAACC	19	hsa-mir-1184-3	25	43	R	0	0	0	3	0	0	0	0	0.5	1	0	0	0	#DIV/0!	X	154687178	154687276	+	MI0015972
TGCTGAGCAGAACCACCT	18	hsa-mir-1184-3	21	38	R	0	0	0	3	0	0	0	0	0.5	1	0	0	0	#DIV/0!	X	154687178	154687276	+	MI0015972
TGTGGCCACTGTTGACTGCTGAGCAGAACCA	31	hsa-mir-1184-3	24	54	R	3	6	0	0	0	0	0	0	1	0	0	#DIV/0!	1.6012	0	X	154687178	154687276	+	MI0015972
GATGTGGCCACTGTTGACTGCTGAGCAGAACCACC	35	hsa-mir-1184-3	22	56	R	3	3	0	0	0	0	0	0	0.5	0	0	#DIV/0!	0.8006	0	X	154687178	154687276	+	MI0015972
ACGGAAGCCATCAAGTCGCTGCAGGTGGAGATGT	34	hsa-mir-1184-3	52	85	R	3	3	0	0	0	0	0	0	0.5	0	0	#DIV/0!	0.8006	0	X	154687178	154687276	+	MI0015972
GCTGCAGGTGGAGATGTGGCCACTGTTGACTGC	33	hsa-mir-1184-3	36	68	R	0	0	3	0	0	0	0	0	0.5	0	0	#DIV/0!	0.8006	0	X	154687178	154687276	+	MI0015972
CTGTTGACTGCTGAGCAGAACCACCT	26	hsa-mir-1184-3	21	46	R	0	0	3	0	0	0	0	0	0.5	0	0	#DIV/0!	0.8006	0	X	154687178	154687276	+	MI0015972
TTGACTGCTGAGCAGAACCACCT	23	hsa-mir-1184-3	21	43	R	0	0	0	0	3	0	0	0	0.5	0	0	#DIV/0!	0.8006	0	X	154687178	154687276	+	MI0015972
AGAGGATACCCTTTGTATGTT	21	hsa-mir-1185-1	15	35	F	2	962	1304	3182	1600	1696	584	5198	1554.67	1820.67	4770.57	2.62023	1031.71	1.76471	14	101509314	101509399	+	MI0003844
AGAGGATACCCTTTGTATGTTC	22	hsa-mir-1185-1	15	36	F	2	756	882	1260	900	994	456	2292	874.667	903.333	2103.53	2.32863	677.308	1.33371	14	101509314	101509399	+	MI0003844
AGAGGATACCCTTTGTATGT	20	hsa-mir-1185-1	15	34	F	2	96	118	242	146	140	80	308	137	154	282.673	1.83554	96.072	1.60296	14	101509314	101509399	+	MI0003844
ATATACAGGGGGAGACTCTTAT	22	hsa-mir-1185-1	53	74	F	1	38	51	51	35	38	27	90	40	38.6667	82.5993	2.13619	33.0915	1.16848	14	101509314	101509399	+	MI0003844
AGAGGATACCCTTTGTATG	19	hsa-mir-1185-1	15	33	F	2	12	18	14	12	14	4	28	12.3333	10.6667	25.6976	2.40915	11.2084	0.951667	14	101509314	101509399	+	MI0003844
ATATACAGGGGGAGACTCTTA	21	hsa-mir-1185-1	53	73	F	1	10	7	4	3	9	6	8	6.5	6.33333	7.34216	1.15929	5.33733	1.18661	14	101509314	101509399	+	MI0003844
AGAGGATACCCTTTGTATGTTCA	23	hsa-mir-1185-1	15	37	F	2	4	4	10	6	0	2	4	4.33333	4	3.67108	0.91777	3.73613	1.07063	14	101509314	101509399	+	MI0003844
ATATACAGGGGGAGACTCTT	20	hsa-mir-1185-1	53	72	F	1	6	1	7	3	2	3	8	3.66667	4	7.34216	1.83554	2.66867	1.49888	14	101509314	101509399	+	MI0003844
AGAGGATACCCTTTGTA	17	hsa-mir-1185-1	15	31	F	2	2	6	2	6	4	2	8	3.66667	2.66667	7.34216	2.75331	3.73613	0.71375	14	101509314	101509399	+	MI0003844
TATACAGGGGGAGACTCTTAT	21	hsa-mir-1185-1	54	74	F	0	0	8	2	2	2	3	0	2.83333	2.33333	0	0	2.66867	0.874344	14	101509314	101509399	+	MI0003844
AATATACAGGGGGAGACTCTTAT	23	hsa-mir-1185-1	52	74	F	1	2	3	4	1	2	1	2	2.16667	2.33333	1.83554	0.78666	1.6012	1.45724	14	101509314	101509399	+	MI0003844
ATATACAGGGGGAGACTCT	19	hsa-mir-1185-1	53	71	F	2	2	0	0	0	2	2	4	1	1.33333	3.67108	2.75331	0.533733	2.49813	14	101509314	101509399	+	MI0003844
[truncated: 31,964 more rows]
