# Supplementary material for: Expression of microRNAs and Other Small RNAs in Prefrontal Cortex in Schizophrenia, Bipolar Disorder and Depressed Subjects
Source: PLoS One. 2014 Jan 27;9(1):e86469. doi: 10.1371/journal.pone.0086469 (PMC3903529; doi:10.1371/journal.pone.0086469)
Supplement: File S3 — Deep sequencing of synaptosome small RNAs in controls vs. schizophrenia. Sheet 1: Number of total and mappable reads in each sample. Sheet 2: Reads aligning uniquely to the human genome, 15–40 nt., within an annotated RefGene locus, filtered to include only sequences expressed >10 reads in at least one sample. Shows both raw and normalized counts. (XLSX) [file pone.0086469.s003.xlsx]

## Sheet: mappable reads
Controls	Raw Reads	Raw Reads - Trimmed	Mapped	% mapped
Syn_1	18786237	17372139	15125495	87.0675
Syn_2	16091038	14995536	13140359	87.6285
Syn_3	16378027	15342385	13585198	88.5468
Syn_4	16609802	15681185	13997086	89.2604
Syn_5	13531105	12578041	10908849	86.7293
Schizophrenia
Syn_6	15829825	14516674	12461067	85.8397	suicide pool - the present paper only reports results excluding this sample
Syn_7	15759131	14929987	13101472	87.7527
Syn_8	16232820	14954025	13397127	89.5888
Syn_9	19633395	18451070	16938994	91.8049
Syn_10	18385685	17166158	15287611	89.0567
Syn_11	15493913	13891545	12108380	87.1637

## Sheet: unique alignments
																raw reads											normalized reads
READ	SEQ	LENGTH	NUM_ALNS	REF	REF_START	REF_END	REF_STRAND	MATCH_TYPE	SOURCE_FEATURES	FEATURE_NAME	GENE_SYMBOL	FEATURE_START	FEATURE_END	FEATURE_STRAND	DESCRIPTION	Syn_10	Syn_11	Syn_1	Syn_2	Syn_3	Syn_4	Syn_5	Syn_6	Syn_7	Syn_8	Syn_9	N syn 1 F	N syn 3 F	N syn 2 M	N syn 4 M	N syn 5 M	control mean	N syn 9 F	N syn 11 F	N syn 7 M	N syn 8 M	N syn 10 M	N syn 6 sui	Schiz nonsuicide mean	Schiz/Control	ttest	>100 in control or schiz mean?
srna837246	ACTCCAGCCCCACAGCCTCAGC	22	1	chrX	118780726	118780747	-	EXACT	refGene	NM_015129	2013-09-06	118750908	118827333	-	Homo sapiens septin 6 (SEPT6), transcript variant II, mRNA.	295	174	321	264	410	207	240	255	195	204	201	212.231	301.803	200.913	147.889	220.002	216.568	118.661	143.707	148.844	152.273	192.962	204.655	151.289	0.698577	0.0568653	1
srna837246	ACTCCAGCCCCACAGCCTCAGC	22	1	chrX	118780726	118780747	-	EXACT	refGene	NM_145799	2013-09-06	118750908	118827333	-	Homo sapiens septin 6 (SEPT6), transcript variant I, mRNA.	295	174	321	264	410	207	240	255	195	204	201	212.231	301.803	200.913	147.889	220.002	216.568	118.661	143.707	148.844	152.273	192.962	204.655	151.289	0.698577	0.0568653	1
srna837246	ACTCCAGCCCCACAGCCTCAGC	22	1	chrX	118780726	118780747	-	EXACT	refGene	NM_145800	2013-09-06	118749687	118827333	-	Homo sapiens septin 6 (SEPT6), transcript variant III, mRNA.	295	174	321	264	410	207	240	255	195	204	201	212.231	301.803	200.913	147.889	220.002	216.568	118.661	143.707	148.844	152.273	192.962	204.655	151.289	0.698577	0.0568653	1
srna837246	ACTCCAGCCCCACAGCCTCAGC	22	1	chrX	118780726	118780747	-	EXACT	refGene	NM_145802	2013-09-06	118749687	118827333	-	Homo sapiens septin 6 (SEPT6), transcript variant V, mRNA.	295	174	321	264	410	207	240	255	195	204	201	212.231	301.803	200.913	147.889	220.002	216.568	118.661	143.707	148.844	152.273	192.962	204.655	151.289	0.698577	0.0568653	1
srna837241	ACTCCAGCCCCACAGCCTCAG	21	1	chrX	118780727	118780747	-	EXACT	refGene	NM_015129	2013-09-06	118750908	118827333	-	Homo sapiens septin 6 (SEPT6), transcript variant II, mRNA.	29	27	57	35	62	23	35	21	33	24	32	37.686	45.6386	26.6362	16.4321	32.0836	31.6953	18.8913	22.2993	25.1889	17.9145	18.9691	16.8539	20.6526	0.651599	0.088649	0
srna837241	ACTCCAGCCCCACAGCCTCAG	21	1	chrX	118780727	118780747	-	EXACT	refGene	NM_145799	2013-09-06	118750908	118827333	-	Homo sapiens septin 6 (SEPT6), transcript variant I, mRNA.	29	27	57	35	62	23	35	21	33	24	32	37.686	45.6386	26.6362	16.4321	32.0836	31.6953	18.8913	22.2993	25.1889	17.9145	18.9691	16.8539	20.6526	0.651599	0.088649	0
srna837241	ACTCCAGCCCCACAGCCTCAG	21	1	chrX	118780727	118780747	-	EXACT	refGene	NM_145800	2013-09-06	118749687	118827333	-	Homo sapiens septin 6 (SEPT6), transcript variant III, mRNA.	29	27	57	35	62	23	35	21	33	24	32	37.686	45.6386	26.6362	16.4321	32.0836	31.6953	18.8913	22.2993	25.1889	17.9145	18.9691	16.8539	20.6526	0.651599	0.088649	0
srna837241	ACTCCAGCCCCACAGCCTCAG	21	1	chrX	118780727	118780747	-	EXACT	refGene	NM_145802	2013-09-06	118749687	118827333	-	Homo sapiens septin 6 (SEPT6), transcript variant V, mRNA.	29	27	57	35	62	23	35	21	33	24	32	37.686	45.6386	26.6362	16.4321	32.0836	31.6953	18.8913	22.2993	25.1889	17.9145	18.9691	16.8539	20.6526	0.651599	0.088649	0
srna2972141	CTCCAGCCCCACAGCCTCAGC	21	1	chrX	118780726	118780746	-	EXACT	refGene	NM_015129	2013-09-06	118750908	118827333	-	Homo sapiens septin 6 (SEPT6), transcript variant II, mRNA.	10	14	24	10	37	20	10	19	18	17	9	15.8678	27.2359	7.61035	14.2888	9.16674	14.8339	5.31318	11.5626	13.7394	12.6894	6.54108	15.2488	9.96914	0.67205	0.255078	0
srna2972141	CTCCAGCCCCACAGCCTCAGC	21	1	chrX	118780726	118780746	-	EXACT	refGene	NM_145799	2013-09-06	118750908	118827333	-	Homo sapiens septin 6 (SEPT6), transcript variant I, mRNA.	10	14	24	10	37	20	10	19	18	17	9	15.8678	27.2359	7.61035	14.2888	9.16674	14.8339	5.31318	11.5626	13.7394	12.6894	6.54108	15.2488	9.96914	0.67205	0.255078	0
srna2972141	CTCCAGCCCCACAGCCTCAGC	21	1	chrX	118780726	118780746	-	EXACT	refGene	NM_145800	2013-09-06	118749687	118827333	-	Homo sapiens septin 6 (SEPT6), transcript variant III, mRNA.	10	14	24	10	37	20	10	19	18	17	9	15.8678	27.2359	7.61035	14.2888	9.16674	14.8339	5.31318	11.5626	13.7394	12.6894	6.54108	15.2488	9.96914	0.67205	0.255078	0
srna2972141	CTCCAGCCCCACAGCCTCAGC	21	1	chrX	118780726	118780746	-	EXACT	refGene	NM_145802	2013-09-06	118749687	118827333	-	Homo sapiens septin 6 (SEPT6), transcript variant V, mRNA.	10	14	24	10	37	20	10	19	18	17	9	15.8678	27.2359	7.61035	14.2888	9.16674	14.8339	5.31318	11.5626	13.7394	12.6894	6.54108	15.2488	9.96914	0.67205	0.255078	0
srna837233	ACTCCAGCCCCACAGCCTCA	20	1	chrX	118780728	118780747	-	EXACT	refGene	NM_015129	2013-09-06	118750908	118827333	-	Homo sapiens septin 6 (SEPT6), transcript variant II, mRNA.	15	12	16	9	16	14	12	14	12	13	12	10.5785	11.7777	6.84932	10.0021	11.0001	10.0416	7.08424	9.9108	9.15961	9.70366	9.81162	11.236	9.13399	0.909619	0.39562	0
srna837233	ACTCCAGCCCCACAGCCTCA	20	1	chrX	118780728	118780747	-	EXACT	refGene	NM_145799	2013-09-06	118750908	118827333	-	Homo sapiens septin 6 (SEPT6), transcript variant I, mRNA.	15	12	16	9	16	14	12	14	12	13	12	10.5785	11.7777	6.84932	10.0021	11.0001	10.0416	7.08424	9.9108	9.15961	9.70366	9.81162	11.236	9.13399	0.909619	0.39562	0
srna837233	ACTCCAGCCCCACAGCCTCA	20	1	chrX	118780728	118780747	-	EXACT	refGene	NM_145800	2013-09-06	118749687	118827333	-	Homo sapiens septin 6 (SEPT6), transcript variant III, mRNA.	15	12	16	9	16	14	12	14	12	13	12	10.5785	11.7777	6.84932	10.0021	11.0001	10.0416	7.08424	9.9108	9.15961	9.70366	9.81162	11.236	9.13399	0.909619	0.39562	0
srna837233	ACTCCAGCCCCACAGCCTCA	20	1	chrX	118780728	118780747	-	EXACT	refGene	NM_145802	2013-09-06	118749687	118827333	-	Homo sapiens septin 6 (SEPT6), transcript variant V, mRNA.	15	12	16	9	16	14	12	14	12	13	12	10.5785	11.7777	6.84932	10.0021	11.0001	10.0416	7.08424	9.9108	9.15961	9.70366	9.81162	11.236	9.13399	0.909619	0.39562	0
srna180622	AACAATATCCTGGTGCTGAGT	21	1	chr17	79099724	79099744	-	EXACT	refGene	NM_001080395	AATK	79091095	79139872	-	Homo sapiens apoptosis-associated tyrosine kinase (AATK), transcript variant 1, mRNA.	7971	7592	7584	7831	9621	9374	6036	8306	3100	2293	5881	5014.21	7082.08	5959.67	6697.15	5533.05	6057.23	3471.87	6270.23	2366.23	1711.58	5213.89	6666.13	3806.76	0.628466	0.0564687	1
srna180622	AACAATATCCTGGTGCTGAGT	21	1	chr17	79099724	79099744	-	EXACT	refGene	NM_004920	AATK	79091095	79105748	-	Homo sapiens apoptosis-associated tyrosine kinase (AATK), transcript variant 2, mRNA.	7971	7592	7584	7831	9621	9374	6036	8306	3100	2293	5881	5014.21	7082.08	5959.67	6697.15	5533.05	6057.23	3471.87	6270.23	2366.23	1711.58	5213.89	6666.13	3806.76	0.628466	0.0564687	1
srna5064337	TCCAGCATCAGTGATTTTGTT	21	1	chr17	79099688	79099708	-	EXACT	refGene	NM_001080395	AATK	79091095	79139872	-	Homo sapiens apoptosis-associated tyrosine kinase (AATK), transcript variant 1, mRNA.	6456	5182	6047	6254	3844	4365	2744	6193	3090	1785	3719	3998.02	2829.59	4759.51	3118.53	2515.35	3444.2	2195.53	4279.81	2358.6	1332.39	4222.92	4970.3	2877.85	0.835564	0.45494	1
srna5064337	TCCAGCATCAGTGATTTTGTT	21	1	chr17	79099688	79099708	-	EXACT	refGene	NM_004920	AATK	79091095	79105748	-	Homo sapiens apoptosis-associated tyrosine kinase (AATK), transcript variant 2, mRNA.	6456	5182	6047	6254	3844	4365	2744	6193	3090	1785	3719	3998.02	2829.59	4759.51	3118.53	2515.35	3444.2	2195.53	4279.81	2358.6	1332.39	4222.92	4970.3	2877.85	0.835564	0.45494	1
srna5064292	TCCAGCATCAGTGATTTTGT	20	1	chr17	79099689	79099708	-	EXACT	refGene	NM_001080395	AATK	79091095	79139872	-	Homo sapiens apoptosis-associated tyrosine kinase (AATK), transcript variant 1, mRNA.	3216	2576	3005	2769	1295	1701	1088	3008	1486	887	2134	1986.78	953.257	2107.31	1215.26	997.342	1451.99	1259.81	2127.52	1134.26	662.089	2103.61	2414.13	1457.46	1.00377	0.988837	1
srna5064292	TCCAGCATCAGTGATTTTGT	20	1	chr17	79099689	79099708	-	EXACT	refGene	NM_004920	AATK	79091095	79105748	-	Homo sapiens apoptosis-associated tyrosine kinase (AATK), transcript variant 2, mRNA.	3216	2576	3005	2769	1295	1701	1088	3008	1486	887	2134	1986.78	953.257	2107.31	1215.26	997.342	1451.99	1259.81	2127.52	1134.26	662.089	2103.61	2414.13	1457.46	1.00377	0.988837	1
srna5064413	TCCAGCATCAGTGATTTTGTTGA	23	1	chr17	79099686	79099708	-	EXACT	refGene	NM_001080395	AATK	79091095	79139872	-	Homo sapiens apoptosis-associated tyrosine kinase (AATK), transcript variant 1, mRNA.	587	479	536	896	1430	1106	808	772	319	248	260	354.38	1052.63	681.887	790.169	740.673	723.948	153.492	395.606	243.493	185.116	383.961	619.583	272.334	0.376178	0.0119171	1
srna5064413	TCCAGCATCAGTGATTTTGTTGA	23	1	chr17	79099686	79099708	-	EXACT	refGene	NM_004920	AATK	79091095	79105748	-	Homo sapiens apoptosis-associated tyrosine kinase (AATK), transcript variant 2, mRNA.	587	479	536	896	1430	1106	808	772	319	248	260	354.38	1052.63	681.887	790.169	740.673	723.948	153.492	395.606	243.493	185.116	383.961	619.583	272.334	0.376178	0.0119171	1
srna180589	AACAATATCCTGGTGCTGAG	20	1	chr17	79099725	79099744	-	EXACT	refGene	NM_001080395	AATK	79091095	79139872	-	Homo sapiens apoptosis-associated tyrosine kinase (AATK), transcript variant 1, mRNA.	550	603	608	597	767	708	500	805	293	243	488	401.983	564.593	454.338	505.823	458.337	477.015	288.093	498.018	223.647	181.384	359.759	646.067	310.18	0.650252	0.0374672	1
srna180589	AACAATATCCTGGTGCTGAG	20	1	chr17	79099725	79099744	-	EXACT	refGene	NM_004920	AATK	79091095	79105748	-	Homo sapiens apoptosis-associated tyrosine kinase (AATK), transcript variant 2, mRNA.	550	603	608	597	767	708	500	805	293	243	488	401.983	564.593	454.338	505.823	458.337	477.015	288.093	498.018	223.647	181.384	359.759	646.067	310.18	0.650252	0.0374672	1
srna582360	ACAATATCCTGGTGCTGAGT	20	1	chr17	79099724	79099743	-	EXACT	refGene	NM_001080395	AATK	79091095	79139872	-	Homo sapiens apoptosis-associated tyrosine kinase (AATK), transcript variant 1, mRNA.	418	450	487	470	492	590	324	520	145	115	299	321.983	362.164	357.686	421.519	297.002	352.071	176.516	371.655	110.679	85.8401	273.417	417.335	203.621	0.578353	0.0462597	1
srna582360	ACAATATCCTGGTGCTGAGT	20	1	chr17	79099724	79099743	-	EXACT	refGene	NM_004920	AATK	79091095	79105748	-	Homo sapiens apoptosis-associated tyrosine kinase (AATK), transcript variant 2, mRNA.	418	450	487	470	492	590	324	520	145	115	299	321.983	362.164	357.686	421.519	297.002	352.071	176.516	371.655	110.679	85.8401	273.417	417.335	203.621	0.578353	0.0462597	1
srna5064412	TCCAGCATCAGTGATTTTGTTG	22	1	chr17	79099687	79099708	-	EXACT	refGene	NM_001080395	AATK	79091095	79139872	-	Homo sapiens apoptosis-associated tyrosine kinase (AATK), transcript variant 1, mRNA.	251	255	266	403	460	389	254	306	174	100	125	175.868	338.609	306.697	277.917	232.835	266.385	73.7942	210.605	132.814	74.6436	164.181	245.586	131.208	0.492548	0.00840589	1
srna5064412	TCCAGCATCAGTGATTTTGTTG	22	1	chr17	79099687	79099708	-	EXACT	refGene	NM_004920	AATK	79091095	79105748	-	Homo sapiens apoptosis-associated tyrosine kinase (AATK), transcript variant 2, mRNA.	251	255	266	403	460	389	254	306	174	100	125	175.868	338.609	306.697	277.917	232.835	266.385	73.7942	210.605	132.814	74.6436	164.181	245.586	131.208	0.492548	0.00840589	1
srna2225685	CCAGCATCAGTGATTTTGTT	20	1	chr17	79099688	79099707	-	EXACT	refGene	NM_001080395	AATK	79091095	79139872	-	Homo sapiens apoptosis-associated tyrosine kinase (AATK), transcript variant 1, mRNA.	288	241	248	294	175	189	132	271	107	102	153	163.967	128.819	223.744	135.029	121.001	154.512	90.3241	199.042	81.6732	76.1364	188.383	217.496	127.112	0.822666	0.435551	1
srna2225685	CCAGCATCAGTGATTTTGTT	20	1	chr17	79099688	79099707	-	EXACT	refGene	NM_004920	AATK	79091095	79105748	-	Homo sapiens apoptosis-associated tyrosine kinase (AATK), transcript variant 2, mRNA.	288	241	248	294	175	189	132	271	107	102	153	163.967	128.819	223.744	135.029	121.001	154.512	90.3241	199.042	81.6732	76.1364	188.383	217.496	127.112	0.822666	0.435551	1
srna1822915	CAATATCCTGGTGCTGAGT	19	1	chr17	79099724	79099742	-	EXACT	refGene	NM_001080395	AATK	79091095	79139872	-	Homo sapiens apoptosis-associated tyrosine kinase (AATK), transcript variant 1, mRNA.	214	191	194	230	199	269	141	189	77	56	132	128.264	146.485	175.038	192.184	129.251	154.245	77.9267	157.747	58.7741	41.8004	139.979	151.685	95.2454	0.617496	0.062646	1
srna1822915	CAATATCCTGGTGCTGAGT	19	1	chr17	79099724	79099742	-	EXACT	refGene	NM_004920	AATK	79091095	79105748	-	Homo sapiens apoptosis-associated tyrosine kinase (AATK), transcript variant 2, mRNA.	214	191	194	230	199	269	141	189	77	56	132	128.264	146.485	175.038	192.184	129.251	154.245	77.9267	157.747	58.7741	41.8004	139.979	151.685	95.2454	0.617496	0.062646	1
srna471617	AATATCCTGGTGCTGAGT	18	1	chr17	79099724	79099741	-	EXACT	refGene	NM_001080395	AATK	79091095	79139872	-	Homo sapiens apoptosis-associated tyrosine kinase (AATK), transcript variant 1, mRNA.	93	121	116	112	123	130	65	93	28	29	65	76.6942	90.541	85.2359	92.877	59.5838	80.9864	38.373	99.9339	21.3724	21.6466	60.832	74.6388	48.4316	0.598021	0.0934577	0
srna471617	AATATCCTGGTGCTGAGT	18	1	chr17	79099724	79099741	-	EXACT	refGene	NM_004920	AATK	79091095	79105748	-	Homo sapiens apoptosis-associated tyrosine kinase (AATK), transcript variant 2, mRNA.	93	121	116	112	123	130	65	93	28	29	65	76.6942	90.541	85.2359	92.877	59.5838	80.9864	38.373	99.9339	21.3724	21.6466	60.832	74.6388	48.4316	0.598021	0.0934577	0
srna582351	ACAATATCCTGGTGCTGAG	19	1	chr17	79099725	79099743	-	EXACT	refGene	NM_001080395	AATK	79091095	79139872	-	Homo sapiens apoptosis-associated tyrosine kinase (AATK), transcript variant 1, mRNA.	94	113	113	114	109	126	78	125	43	20	74	74.7107	80.2356	86.758	90.0193	71.5006	80.6448	43.6862	93.3267	32.8219	14.9287	61.4861	100.321	49.2499	0.610702	0.0774769	0
srna582351	ACAATATCCTGGTGCTGAG	19	1	chr17	79099725	79099743	-	EXACT	refGene	NM_004920	AATK	79091095	79105748	-	Homo sapiens apoptosis-associated tyrosine kinase (AATK), transcript variant 2, mRNA.	94	113	113	114	109	126	78	125	43	20	74	74.7107	80.2356	86.758	90.0193	71.5006	80.6448	43.6862	93.3267	32.8219	14.9287	61.4861	100.321	49.2499	0.610702	0.0774769	0
srna2225677	CCAGCATCAGTGATTTTGT	19	1	chr17	79099689	79099707	-	EXACT	refGene	NM_001080395	AATK	79091095	79139872	-	Homo sapiens apoptosis-associated tyrosine kinase (AATK), transcript variant 1, mRNA.	151	123	134	132	83	90	46	146	70	50	98	88.595	61.0968	100.457	64.2995	42.167	71.323	57.8547	101.586	53.431	37.3218	98.7703	117.175	69.7927	0.978544	0.928626	0
srna2225677	CCAGCATCAGTGATTTTGT	19	1	chr17	79099689	79099707	-	EXACT	refGene	NM_004920	AATK	79091095	79105748	-	Homo sapiens apoptosis-associated tyrosine kinase (AATK), transcript variant 2, mRNA.	151	123	134	132	83	90	46	146	70	50	98	88.595	61.0968	100.457	64.2995	42.167	71.323	57.8547	101.586	53.431	37.3218	98.7703	117.175	69.7927	0.978544	0.928626	0
srna5064252	TCCAGCATCAGTGATTTTG	19	1	chr17	79099690	79099708	-	EXACT	refGene	NM_001080395	AATK	79091095	79139872	-	Homo sapiens apoptosis-associated tyrosine kinase (AATK), transcript variant 1, mRNA.	146	100	117	153	56	85	40	140	53	30	82	77.3554	41.2219	116.438	60.7273	36.667	66.482	48.409	82.59	40.4549	22.3931	95.4997	112.36	57.8694	0.870452	0.675342	0
srna5064252	TCCAGCATCAGTGATTTTG	19	1	chr17	79099690	79099708	-	EXACT	refGene	NM_004920	AATK	79091095	79105748	-	Homo sapiens apoptosis-associated tyrosine kinase (AATK), transcript variant 2, mRNA.	146	100	117	153	56	85	40	140	53	30	82	77.3554	41.2219	116.438	60.7273	36.667	66.482	48.409	82.59	40.4549	22.3931	95.4997	112.36	57.8694	0.870452	0.675342	0
srna180571	AACAATATCCTGGTGCTGA	19	1	chr17	79099726	79099744	-	EXACT	refGene	NM_001080395	AATK	79091095	79139872	-	Homo sapiens apoptosis-associated tyrosine kinase (AATK), transcript variant 1, mRNA.	64	88	98	66	93	87	77	99	37	30	85	64.7934	68.4579	50.2283	62.1562	70.5839	63.2439	50.1801	72.6792	28.2421	22.3931	41.8629	79.4543	43.0715	0.681037	0.0860466	0
srna180571	AACAATATCCTGGTGCTGA	19	1	chr17	79099726	79099744	-	EXACT	refGene	NM_004920	AATK	79091095	79105748	-	Homo sapiens apoptosis-associated tyrosine kinase (AATK), transcript variant 2, mRNA.	64	88	98	66	93	87	77	99	37	30	85	64.7934	68.4579	50.2283	62.1562	70.5839	63.2439	50.1801	72.6792	28.2421	22.3931	41.8629	79.4543	43.0715	0.681037	0.0860466	0
srna1997192	CAGCATCAGTGATTTTGTT	19	1	chr17	79099688	79099706	-	EXACT	refGene	NM_001080395	AATK	79091095	79139872	-	Homo sapiens apoptosis-associated tyrosine kinase (AATK), transcript variant 1, mRNA.	116	75	90	97	57	70	47	88	40	33	53	59.5041	41.958	73.8204	50.0107	43.0837	53.6754	31.2887	61.9425	30.532	24.6324	75.8765	70.626	44.8544	0.835661	0.478834	0
srna1997192	CAGCATCAGTGATTTTGTT	19	1	chr17	79099688	79099706	-	EXACT	refGene	NM_004920	AATK	79091095	79105748	-	Homo sapiens apoptosis-associated tyrosine kinase (AATK), transcript variant 2, mRNA.	116	75	90	97	57	70	47	88	40	33	53	59.5041	41.958	73.8204	50.0107	43.0837	53.6754	31.2887	61.9425	30.532	24.6324	75.8765	70.626	44.8544	0.835661	0.478834	0
srna1822907	CAATATCCTGGTGCTGAG	18	1	chr17	79099725	79099742	-	EXACT	refGene	NM_001080395	AATK	79091095	79139872	-	Homo sapiens apoptosis-associated tyrosine kinase (AATK), transcript variant 1, mRNA.	49	66	60	64	59	60	49	73	18	21	47	39.6694	43.4303	48.7062	42.8663	44.917	43.9179	27.7466	54.5094	13.7394	15.6752	32.0513	58.5875	28.7444	0.654503	0.10669	0
srna1822907	CAATATCCTGGTGCTGAG	18	1	chr17	79099725	79099742	-	EXACT	refGene	NM_004920	AATK	79091095	79105748	-	Homo sapiens apoptosis-associated tyrosine kinase (AATK), transcript variant 2, mRNA.	49	66	60	64	59	60	49	73	18	21	47	39.6694	43.4303	48.7062	42.8663	44.917	43.9179	27.7466	54.5094	13.7394	15.6752	32.0513	58.5875	28.7444	0.654503	0.10669	0
srna2225692	CCAGCATCAGTGATTTTGTTGA	22	1	chr17	79099686	79099707	-	EXACT	refGene	NM_001080395	AATK	79091095	79139872	-	Homo sapiens apoptosis-associated tyrosine kinase (AATK), transcript variant 1, mRNA.	37	16	32	45	71	54	46	35	18	9	12	21.157	52.2635	34.2466	38.5797	42.167	37.6828	7.08424	13.2144	13.7394	6.71792	24.202	28.0899	12.9916	0.344762	0.00492532	0
srna2225692	CCAGCATCAGTGATTTTGTTGA	22	1	chr17	79099686	79099707	-	EXACT	refGene	NM_004920	AATK	79091095	79105748	-	Homo sapiens apoptosis-associated tyrosine kinase (AATK), transcript variant 2, mRNA.	37	16	32	45	71	54	46	35	18	9	12	21.157	52.2635	34.2466	38.5797	42.167	37.6828	7.08424	13.2144	13.7394	6.71792	24.202	28.0899	12.9916	0.344762	0.00492532	0
srna5064225	TCCAGCATCAGTGATTTT	18	1	chr17	79099691	79099708	-	EXACT	refGene	NM_001080395	AATK	79091095	79139872	-	Homo sapiens apoptosis-associated tyrosine kinase (AATK), transcript variant 1, mRNA.	81	60	68	62	25	30	28	32	41	14	48	44.9587	18.4026	47.1842	21.4332	25.6669	31.5291	28.337	49.554	31.2953	10.4501	52.9827	25.6822	34.5238	1.09498	0.768629	0
srna5064225	TCCAGCATCAGTGATTTT	18	1	chr17	79099691	79099708	-	EXACT	refGene	NM_004920	AATK	79091095	79105748	-	Homo sapiens apoptosis-associated tyrosine kinase (AATK), transcript variant 2, mRNA.	81	60	68	62	25	30	28	32	41	14	48	44.9587	18.4026	47.1842	21.4332	25.6669	31.5291	28.337	49.554	31.2953	10.4501	52.9827	25.6822	34.5238	1.09498	0.768629	0
srna809510	ACGGTGCTGGATGTGGCCTTT	21	1	chr17	79107065	79107085	-	EXACT	refGene	NM_001080395	AATK	79091095	79139872	-	Homo sapiens apoptosis-associated tyrosine kinase (AATK), transcript variant 1, mRNA.	23	36	33	38	49	48	19	45	23	9	19	21.8182	36.0692	28.9193	34.2931	17.4168	27.7033	11.2167	29.7324	17.5559	6.71792	15.0445	36.1156	16.0535	0.579479	0.0583951	0
srna4961608	TCAACAAAATCACTGATGCTGGA	23	1	chr17	79099686	79099708	+	EXACT	refGene	NM_001080395	AATK	79091095	79139872	-	Homo sapiens apoptosis-associated tyrosine kinase (AATK), transcript variant 1, mRNA.	23	46	39	35	49	19	34	18	31	30	20	25.7851	36.0692	26.6362	13.5743	31.1669	26.6464	11.8071	37.9914	23.6623	22.3931	15.0445	14.4462	22.1797	0.832371	0.470041	0
srna4961608	TCAACAAAATCACTGATGCTGGA	23	1	chr17	79099686	79099708	+	EXACT	refGene	NM_004920	AATK	79091095	79105748	-	Homo sapiens apoptosis-associated tyrosine kinase (AATK), transcript variant 2, mRNA.	23	46	39	35	49	19	34	18	31	30	20	25.7851	36.0692	26.6362	13.5743	31.1669	26.6464	11.8071	37.9914	23.6623	22.3931	15.0445	14.4462	22.1797	0.832371	0.470041	0
srna180570	AACAATATCCTGGTGCTG	18	1	chr17	79099727	79099744	-	EXACT	refGene	NM_001080395	AATK	79091095	79139872	-	Homo sapiens apoptosis-associated tyrosine kinase (AATK), transcript variant 1, mRNA.	33	27	32	29	39	37	30	34	19	6	20	21.157	28.7081	22.07	26.4342	27.5002	25.1739	11.8071	22.2993	14.5027	4.47861	21.5856	27.2873	14.9347	0.593259	0.0326212	0
srna180570	AACAATATCCTGGTGCTG	18	1	chr17	79099727	79099744	-	EXACT	refGene	NM_004920	AATK	79091095	79105748	-	Homo sapiens apoptosis-associated tyrosine kinase (AATK), transcript variant 2, mRNA.	33	27	32	29	39	37	30	34	19	6	20	21.157	28.7081	22.07	26.4342	27.5002	25.1739	11.8071	22.2993	14.5027	4.47861	21.5856	27.2873	14.9347	0.593259	0.0326212	0
srna2184130	CCAACAATATCCTGGTGCTGAGT	23	1	chr17	79099724	79099746	-	EXACT	refGene	NM_001080395	AATK	79091095	79139872	-	Homo sapiens apoptosis-associated tyrosine kinase (AATK), transcript variant 1, mRNA.	32	26	36	25	38	21	24	25	10	8	24	23.8017	27.972	19.0259	15.0032	22.0002	21.5606	14.1685	21.4734	7.63301	5.97149	20.9314	20.0642	14.0356	0.650982	0.0950199	0
srna2184130	CCAACAATATCCTGGTGCTGAGT	23	1	chr17	79099724	79099746	-	EXACT	refGene	NM_004920	AATK	79091095	79105748	-	Homo sapiens apoptosis-associated tyrosine kinase (AATK), transcript variant 2, mRNA.	32	26	36	25	38	21	24	25	10	8	24	23.8017	27.972	19.0259	15.0032	22.0002	21.5606	14.1685	21.4734	7.63301	5.97149	20.9314	20.0642	14.0356	0.650982	0.0950199	0
srna471611	AATATCCTGGTGCTGAG	17	1	chr17	79099725	79099741	-	EXACT	refGene	NM_001080395	AATK	79091095	79139872	-	Homo sapiens apoptosis-associated tyrosine kinase (AATK), transcript variant 1, mRNA.	28	35	29	28	24	42	18	23	8	14	15	19.1736	17.6665	21.309	30.0064	16.5001	20.9311	8.8553	28.9065	6.1064	10.4501	18.315	18.4591	14.5267	0.694022	0.225528	0
srna471611	AATATCCTGGTGCTGAG	17	1	chr17	79099725	79099741	-	EXACT	refGene	NM_004920	AATK	79091095	79105748	-	Homo sapiens apoptosis-associated tyrosine kinase (AATK), transcript variant 2, mRNA.	28	35	29	28	24	42	18	23	8	14	15	19.1736	17.6665	21.309	30.0064	16.5001	20.9311	8.8553	28.9065	6.1064	10.4501	18.315	18.4591	14.5267	0.694022	0.225528	0
srna1440897	ATATCCTGGTGCTGAGT	17	1	chr17	79099724	79099740	-	EXACT	refGene	NM_001080395	AATK	79091095	79139872	-	Homo sapiens apoptosis-associated tyrosine kinase (AATK), transcript variant 1, mRNA.	20	32	20	30	32	40	16	25	14	10	21	13.2231	23.5554	22.8311	28.5776	14.6668	20.5708	12.3974	26.4288	10.6862	7.46436	13.0822	20.0642	14.0118	0.68115	0.1706	0
srna1440897	ATATCCTGGTGCTGAGT	17	1	chr17	79099724	79099740	-	EXACT	refGene	NM_004920	AATK	79091095	79105748	-	Homo sapiens apoptosis-associated tyrosine kinase (AATK), transcript variant 2, mRNA.	20	32	20	30	32	40	16	25	14	10	21	13.2231	23.5554	22.8311	28.5776	14.6668	20.5708	12.3974	26.4288	10.6862	7.46436	13.0822	20.0642	14.0118	0.68115	0.1706	0
srna1997188	CAGCATCAGTGATTTTGT	18	1	chr17	79099689	79099706	-	EXACT	refGene	NM_001080395	AATK	79091095	79139872	-	Homo sapiens apoptosis-associated tyrosine kinase (AATK), transcript variant 1, mRNA.	24	36	32	42	20	22	21	39	23	14	36	21.157	14.7221	31.9635	15.7177	19.2502	20.5621	21.2527	29.7324	17.5559	10.4501	15.6986	31.3002	18.9379	0.921013	0.724579	0
srna1997188	CAGCATCAGTGATTTTGT	18	1	chr17	79099689	79099706	-	EXACT	refGene	NM_004920	AATK	79091095	79105748	-	Homo sapiens apoptosis-associated tyrosine kinase (AATK), transcript variant 2, mRNA.	24	36	32	42	20	22	21	39	23	14	36	21.157	14.7221	31.9635	15.7177	19.2502	20.5621	21.2527	29.7324	17.5559	10.4501	15.6986	31.3002	18.9379	0.921013	0.724579	0
srna582345	ACAATATCCTGGTGCTGA	18	1	chr17	79099726	79099743	-	EXACT	refGene	NM_001080395	AATK	79091095	79139872	-	Homo sapiens apoptosis-associated tyrosine kinase (AATK), transcript variant 1, mRNA.	20	21	26	23	35	22	12	29	13	7	11	17.1901	25.7637	17.5038	15.7177	11.0001	17.4351	6.49389	17.3439	9.92291	5.22505	13.0822	23.2745	10.4136	0.597278	0.0630477	0
srna582345	ACAATATCCTGGTGCTGA	18	1	chr17	79099726	79099743	-	EXACT	refGene	NM_004920	AATK	79091095	79105748	-	Homo sapiens apoptosis-associated tyrosine kinase (AATK), transcript variant 2, mRNA.	20	21	26	23	35	22	12	29	13	7	11	17.1901	25.7637	17.5038	15.7177	11.0001	17.4351	6.49389	17.3439	9.92291	5.22505	13.0822	23.2745	10.4136	0.597278	0.0630477	0
srna2225691	CCAGCATCAGTGATTTTGTTG	21	1	chr17	79099687	79099707	-	EXACT	refGene	NM_001080395	AATK	79091095	79139872	-	Homo sapiens apoptosis-associated tyrosine kinase (AATK), transcript variant 1, mRNA.	16	20	25	14	23	30	17	20	6	3	7	16.5289	16.9304	10.6545	21.4332	15.5835	16.2261	4.13248	16.518	4.5798	2.23931	10.4657	16.0514	7.58706	0.467584	0.0287305	0
srna2225691	CCAGCATCAGTGATTTTGTTG	21	1	chr17	79099687	79099707	-	EXACT	refGene	NM_004920	AATK	79091095	79105748	-	Homo sapiens apoptosis-associated tyrosine kinase (AATK), transcript variant 2, mRNA.	16	20	25	14	23	30	17	20	6	3	7	16.5289	16.9304	10.6545	21.4332	15.5835	16.2261	4.13248	16.518	4.5798	2.23931	10.4657	16.0514	7.58706	0.467584	0.0287305	0
srna2972046	CTCCAGCATCAGTGATTTTGT	21	1	chr17	79099689	79099709	-	EXACT	refGene	NM_001080395	AATK	79091095	79139872	-	Homo sapiens apoptosis-associated tyrosine kinase (AATK), transcript variant 1, mRNA.	18	23	30	28	20	13	12	23	16	7	20	19.8347	14.7221	21.309	9.2877	11.0001	15.2307	11.8071	18.9957	12.2128	5.22505	11.7739	18.4591	12.0029	0.788073	0.344822	0
srna2972046	CTCCAGCATCAGTGATTTTGT	21	1	chr17	79099689	79099709	-	EXACT	refGene	NM_004920	AATK	79091095	79105748	-	Homo sapiens apoptosis-associated tyrosine kinase (AATK), transcript variant 2, mRNA.	18	23	30	28	20	13	12	23	16	7	20	19.8347	14.7221	21.309	9.2877	11.0001	15.2307	11.8071	18.9957	12.2128	5.22505	11.7739	18.4591	12.0029	0.788073	0.344822	0
srna1777561	CAACAATATCCTGGTGCTGAGT	22	1	chr17	79099724	79099745	-	EXACT	refGene	NM_001080395	AATK	79091095	79139872	-	Homo sapiens apoptosis-associated tyrosine kinase (AATK), transcript variant 1, mRNA.	31	10	17	22	24	19	12	30	4	1	19	11.2397	17.6665	16.7428	13.5743	11.0001	14.0447	11.2167	8.259	3.0532	0.746436	20.2773	24.077	8.71054	0.620202	0.206047	0
srna1777561	CAACAATATCCTGGTGCTGAGT	22	1	chr17	79099724	79099745	-	EXACT	refGene	NM_004920	AATK	79091095	79105748	-	Homo sapiens apoptosis-associated tyrosine kinase (AATK), transcript variant 2, mRNA.	31	10	17	22	24	19	12	30	4	1	19	11.2397	17.6665	16.7428	13.5743	11.0001	14.0447	11.2167	8.259	3.0532	0.746436	20.2773	24.077	8.71054	0.620202	0.206047	0
srna2972048	CTCCAGCATCAGTGATTTTGTT	22	1	chr17	79099688	79099709	-	EXACT	refGene	NM_001080395	AATK	79091095	79139872	-	Homo sapiens apoptosis-associated tyrosine kinase (AATK), transcript variant 1, mRNA.	24	12	23	19	27	13	11	22	6	6	14	15.2066	19.8749	14.4597	9.2877	10.0834	13.7825	8.26495	9.9108	4.5798	4.47861	15.6986	17.6565	8.58655	0.623006	0.102682	0
srna2972048	CTCCAGCATCAGTGATTTTGTT	22	1	chr17	79099688	79099709	-	EXACT	refGene	NM_004920	AATK	79091095	79105748	-	Homo sapiens apoptosis-associated tyrosine kinase (AATK), transcript variant 2, mRNA.	24	12	23	19	27	13	11	22	6	6	14	15.2066	19.8749	14.4597	9.2877	10.0834	13.7825	8.26495	9.9108	4.5798	4.47861	15.6986	17.6565	8.58655	0.623006	0.102682	0
srna5013118	TCAGCACCAGGATATTGTTGGA	22	1	chr17	79099726	79099747	+	EXACT	refGene	NM_001080395	AATK	79091095	79139872	-	Homo sapiens apoptosis-associated tyrosine kinase (AATK), transcript variant 1, mRNA.	14	11	22	14	18	13	17	4	10	10	12	14.5455	13.2499	10.6545	9.2877	15.5835	12.6642	7.08424	9.0849	7.63301	7.46436	9.15751	3.21027	8.0848	0.638398	0.0145548	0
srna5013118	TCAGCACCAGGATATTGTTGGA	22	1	chr17	79099726	79099747	+	EXACT	refGene	NM_004920	AATK	79091095	79105748	-	Homo sapiens apoptosis-associated tyrosine kinase (AATK), transcript variant 2, mRNA.	14	11	22	14	18	13	17	4	10	10	12	14.5455	13.2499	10.6545	9.2877	15.5835	12.6642	7.08424	9.0849	7.63301	7.46436	9.15751	3.21027	8.0848	0.638398	0.0145548	0
srna2225665	CCAGCATCAGTGATTTTG	18	1	chr17	79099690	79099707	-	EXACT	refGene	NM_001080395	AATK	79091095	79139872	-	Homo sapiens apoptosis-associated tyrosine kinase (AATK), transcript variant 1, mRNA.	28	18	21	29	7	21	5	21	10	12	14	13.8843	5.15274	22.07	15.0032	4.58337	12.1387	8.26495	14.8662	7.63301	8.95723	18.315	16.8539	11.6073	0.956219	0.895736	0
srna2225665	CCAGCATCAGTGATTTTG	18	1	chr17	79099690	79099707	-	EXACT	refGene	NM_004920	AATK	79091095	79105748	-	Homo sapiens apoptosis-associated tyrosine kinase (AATK), transcript variant 2, mRNA.	28	18	21	29	7	21	5	21	10	12	14	13.8843	5.15274	22.07	15.0032	4.58337	12.1387	8.26495	14.8662	7.63301	8.95723	18.315	16.8539	11.6073	0.956219	0.895736	0
srna1073114	AGCATCAGTGATTTTGTTGA	20	1	chr17	79099686	79099705	-	EXACT	refGene	NM_001080395	AATK	79091095	79139872	-	Homo sapiens apoptosis-associated tyrosine kinase (AATK), transcript variant 1, mRNA.	8	6	7	14	17	21	14	4	3	1	1	4.6281	12.5138	10.6545	15.0032	12.8334	11.1266	0.590354	4.9554	2.2899	0.746436	5.23286	3.21027	2.76299	0.248323	0.00552971	0
srna1073114	AGCATCAGTGATTTTGTTGA	20	1	chr17	79099686	79099705	-	EXACT	refGene	NM_004920	AATK	79091095	79105748	-	Homo sapiens apoptosis-associated tyrosine kinase (AATK), transcript variant 2, mRNA.	8	6	7	14	17	21	14	4	3	1	1	4.6281	12.5138	10.6545	15.0032	12.8334	11.1266	0.590354	4.9554	2.2899	0.746436	5.23286	3.21027	2.76299	0.248323	0.00552971	0
srna582344	ACAATATCCTGGTGCTG	17	1	chr17	79099727	79099743	-	EXACT	refGene	NM_001080395	AATK	79091095	79139872	-	Homo sapiens apoptosis-associated tyrosine kinase (AATK), transcript variant 1, mRNA.	14	13	11	13	15	25	9	14	3	5	10	7.27273	11.0416	9.89346	17.861	8.25007	10.8638	5.90354	10.7367	2.2899	3.73218	9.15751	11.236	6.36397	0.585798	0.104833	0
srna582344	ACAATATCCTGGTGCTG	17	1	chr17	79099727	79099743	-	EXACT	refGene	NM_004920	AATK	79091095	79105748	-	Homo sapiens apoptosis-associated tyrosine kinase (AATK), transcript variant 2, mRNA.	14	13	11	13	15	25	9	14	3	5	10	7.27273	11.0416	9.89346	17.861	8.25007	10.8638	5.90354	10.7367	2.2899	3.73218	9.15751	11.236	6.36397	0.585798	0.104833	0
srna1997197	CAGCATCAGTGATTTTGTTGA	21	1	chr17	79099686	79099706	-	EXACT	refGene	NM_001080395	AATK	79091095	79139872	-	Homo sapiens apoptosis-associated tyrosine kinase (AATK), transcript variant 1, mRNA.	2	6	7	12	17	10	7	10	2	4	5	4.6281	12.5138	9.13242	7.14439	6.41672	7.96709	2.95177	4.9554	1.5266	2.98574	1.30822	8.02568	2.74555	0.344611	0.0137952	0
srna1997197	CAGCATCAGTGATTTTGTTGA	21	1	chr17	79099686	79099706	-	EXACT	refGene	NM_004920	AATK	79091095	79105748	-	Homo sapiens apoptosis-associated tyrosine kinase (AATK), transcript variant 2, mRNA.	2	6	7	12	17	10	7	10	2	4	5	4.6281	12.5138	9.13242	7.14439	6.41672	7.96709	2.95177	4.9554	1.5266	2.98574	1.30822	8.02568	2.74555	0.344611	0.0137952	0
srna809525	ACGGTGCTGGATGTGGCCTTTT	22	1	chr17	79107064	79107085	-	EXACT	refGene	NM_001080395	AATK	79091095	79139872	-	Homo sapiens apoptosis-associated tyrosine kinase (AATK), transcript variant 1, mRNA.	5	15	8	12	13	12	6	9	3	3	5	5.28926	9.56938	9.13242	8.57327	5.50005	7.61287	2.95177	12.3885	2.2899	2.23931	3.27054	7.22311	4.628	0.607918	0.218026	0
srna5064188	TCCAGCATCAGTGATTT	17	1	chr17	79099692	79099708	-	EXACT	refGene	NM_001080395	AATK	79091095	79139872	-	Homo sapiens apoptosis-associated tyrosine kinase (AATK), transcript variant 1, mRNA.	7	8	10	15	4	11	7	12	8	2	10	6.61157	2.94442	11.4155	7.85883	6.41672	7.04941	5.90354	6.6072	6.1064	1.49287	4.57875	9.63082	4.93775	0.700449	0.240388	0
srna5064188	TCCAGCATCAGTGATTT	17	1	chr17	79099692	79099708	-	EXACT	refGene	NM_004920	AATK	79091095	79105748	-	Homo sapiens apoptosis-associated tyrosine kinase (AATK), transcript variant 2, mRNA.	7	8	10	15	4	11	7	12	8	2	10	6.61157	2.94442	11.4155	7.85883	6.41672	7.04941	5.90354	6.6072	6.1064	1.49287	4.57875	9.63082	4.93775	0.700449	0.240388	0
srna4961607	TCAACAAAATCACTGATGCTGG	22	1	chr17	79099686	79099707	+	EXACT	refGene	NM_001080395	AATK	79091095	79139872	-	Homo sapiens apoptosis-associated tyrosine kinase (AATK), transcript variant 1, mRNA.	5	2	10	6	9	9	12	6	4	5	6	6.61157	6.62495	4.56621	6.42995	11.0001	7.04656	3.54212	1.6518	3.0532	3.73218	3.27054	4.81541	3.04997	0.432831	0.01654	0
srna4961607	TCAACAAAATCACTGATGCTGG	22	1	chr17	79099686	79099707	+	EXACT	refGene	NM_004920	AATK	79091095	79105748	-	Homo sapiens apoptosis-associated tyrosine kinase (AATK), transcript variant 2, mRNA.	5	2	10	6	9	9	12	6	4	5	6	6.61157	6.62495	4.56621	6.42995	11.0001	7.04656	3.54212	1.6518	3.0532	3.73218	3.27054	4.81541	3.04997	0.432831	0.01654	0
srna2225660	CCAGCATCAGTGATTTT	17	1	chr17	79099691	79099707	-	EXACT	refGene	NM_001080395	AATK	79091095	79139872	-	Homo sapiens apoptosis-associated tyrosine kinase (AATK), transcript variant 1, mRNA.	16	7	12	11	8	6	5	11	4	2	6	7.93388	5.88885	8.37139	4.28663	4.58337	6.21282	3.54212	5.7813	3.0532	1.49287	10.4657	8.82825	4.86704	0.783387	0.475389	0
srna2225660	CCAGCATCAGTGATTTT	17	1	chr17	79099691	79099707	-	EXACT	refGene	NM_004920	AATK	79091095	79105748	-	Homo sapiens apoptosis-associated tyrosine kinase (AATK), transcript variant 2, mRNA.	16	7	12	11	8	6	5	11	4	2	6	7.93388	5.88885	8.37139	4.28663	4.58337	6.21282	3.54212	5.7813	3.0532	1.49287	10.4657	8.82825	4.86704	0.783387	0.475389	0
srna180555	AACAATATCCTGGTGCT	17	1	chr17	79099728	79099744	-	EXACT	refGene	NM_001080395	AATK	79091095	79139872	-	Homo sapiens apoptosis-associated tyrosine kinase (AATK), transcript variant 1, mRNA.	8	14	5	8	9	10	7	8	6	3	7	3.30579	6.62495	6.08828	7.14439	6.41672	5.91603	4.13248	11.5626	4.5798	2.23931	5.23286	6.42055	5.54941	0.93803	0.839153	0
srna180555	AACAATATCCTGGTGCT	17	1	chr17	79099728	79099744	-	EXACT	refGene	NM_004920	AATK	79091095	79105748	-	Homo sapiens apoptosis-associated tyrosine kinase (AATK), transcript variant 2, mRNA.	8	14	5	8	9	10	7	8	6	3	7	3.30579	6.62495	6.08828	7.14439	6.41672	5.91603	4.13248	11.5626	4.5798	2.23931	5.23286	6.42055	5.54941	0.93803	0.839153	0
srna1997196	CAGCATCAGTGATTTTGTTG	20	1	chr17	79099687	79099706	-	EXACT	refGene	NM_001080395	AATK	79091095	79139872	-	Homo sapiens apoptosis-associated tyrosine kinase (AATK), transcript variant 1, mRNA.	6	7	1	8	12	8	6	8	2	2	1	0.661157	8.83327	6.08828	5.71551	5.50005	5.35965	0.590354	5.7813	1.5266	1.49287	3.92465	6.42055	2.66315	0.496889	0.140177	0
srna1997196	CAGCATCAGTGATTTTGTTG	20	1	chr17	79099687	79099706	-	EXACT	refGene	NM_004920	AATK	79091095	79105748	-	Homo sapiens apoptosis-associated tyrosine kinase (AATK), transcript variant 2, mRNA.	6	7	1	8	12	8	6	8	2	2	1	0.661157	8.83327	6.08828	5.71551	5.50005	5.35965	0.590354	5.7813	1.5266	1.49287	3.92465	6.42055	2.66315	0.496889	0.140177	0
srna4961613	TCAACAAAATCACTGATGCTGGAGT	25	1	chr17	79099686	79099710	+	EXACT	refGene	NM_001080395	AATK	79091095	79139872	-	Homo sapiens apoptosis-associated tyrosine kinase (AATK), transcript variant 1, mRNA.	15	7	11	8	6	4	5	9	11	8	2	7.27273	4.41664	6.08828	2.85776	4.58337	5.04375	1.18071	5.7813	8.39631	5.97149	9.81162	7.22311	6.22828	1.23485	0.500953	0
srna4961613	TCAACAAAATCACTGATGCTGGAGT	25	1	chr17	79099686	79099710	+	EXACT	refGene	NM_004920	AATK	79091095	79105748	-	Homo sapiens apoptosis-associated tyrosine kinase (AATK), transcript variant 2, mRNA.	15	7	11	8	6	4	5	9	11	8	2	7.27273	4.41664	6.08828	2.85776	4.58337	5.04375	1.18071	5.7813	8.39631	5.97149	9.81162	7.22311	6.22828	1.23485	0.500953	0
srna5013121	TCAGCACCAGGATATTGTTGGAG	23	1	chr17	79099726	79099748	+	EXACT	refGene	NM_001080395	AATK	79091095	79139872	-	Homo sapiens apoptosis-associated tyrosine kinase (AATK), transcript variant 1, mRNA.	10	5	9	2	5	6	8		4	7	8	5.95041	3.68053	1.52207	4.28663	7.33339	4.55461	4.72283	4.1295	3.0532	5.22505	6.54108	0	4.73433	1.03946	0.880484	0
srna5013121	TCAGCACCAGGATATTGTTGGAG	23	1	chr17	79099726	79099748	+	EXACT	refGene	NM_004920	AATK	79091095	79105748	-	Homo sapiens apoptosis-associated tyrosine kinase (AATK), transcript variant 2, mRNA.	10	5	9	2	5	6	8		4	7	8	5.95041	3.68053	1.52207	4.28663	7.33339	4.55461	4.72283	4.1295	3.0532	5.22505	6.54108	0	4.73433	1.03946	0.880484	0
srna180669	AACAATATCCTGGTGCTGAGTGA	23	1	chr17	79099722	79099744	-	EXACT	refGene	NM_001080395	AATK	79091095	79139872	-	Homo sapiens apoptosis-associated tyrosine kinase (AATK), transcript variant 1, mRNA.	9	4	7	4	8	9	2	11		4	9	4.6281	5.88885	3.04414	6.42995	1.83335	4.36488	5.31318	3.3036	0	2.98574	5.88697	8.82825	3.4979	0.801374	0.538745	0
srna180669	AACAATATCCTGGTGCTGAGTGA	23	1	chr17	79099722	79099744	-	EXACT	refGene	NM_004920	AATK	79091095	79105748	-	Homo sapiens apoptosis-associated tyrosine kinase (AATK), transcript variant 2, mRNA.	9	4	7	4	8	9	2	11		4	9	4.6281	5.88885	3.04414	6.42995	1.83335	4.36488	5.31318	3.3036	0	2.98574	5.88697	8.82825	3.4979	0.801374	0.538745	0
srna2829276	CGGTGCTGGATGTGGCCTTT	20	1	chr17	79107065	79107084	-	EXACT	refGene	NM_001080395	AATK	79091095	79139872	-	Homo sapiens apoptosis-associated tyrosine kinase (AATK), transcript variant 1, mRNA.		11	3	9	9	3	4	4	1			1.98347	6.62495	6.84932	2.14332	3.6667	4.25355	0	9.0849	0.763301	0	0	3.21027	1.96964	0.463058	0.30994	0
srna180668	AACAATATCCTGGTGCTGAGTG	22	1	chr17	79099723	79099744	-	EXACT	refGene	NM_001080395	AATK	79091095	79139872	-	Homo sapiens apoptosis-associated tyrosine kinase (AATK), transcript variant 1, mRNA.	4	4	5	2	10	3	3	5	1	2		3.30579	7.36106	1.52207	2.14332	2.75002	3.41645	0	3.3036	0.763301	1.49287	2.61643	4.01284	1.63524	0.478637	0.182498	0
srna180668	AACAATATCCTGGTGCTGAGTG	22	1	chr17	79099723	79099744	-	EXACT	refGene	NM_004920	AATK	79091095	79105748	-	Homo sapiens apoptosis-associated tyrosine kinase (AATK), transcript variant 2, mRNA.	4	4	5	2	10	3	3	5	1	2		3.30579	7.36106	1.52207	2.14332	2.75002	3.41645	0	3.3036	0.763301	1.49287	2.61643	4.01284	1.63524	0.478637	0.182498	0
srna1739521	ATTTGGTGTATGTGCTTGGCTGAGGAGCCAATGGG	35	1	chr7	48672368	48672402	+	EXACT	refGene	NM_152701	ABCA13	48211056	48687091	+	Homo sapiens ATP-binding cassette, sub-family A (ABC1), member 13 (ABCA13), mRNA.	7	11	5	4	1	4	1	4	7	5	2	3.30579	0.736106	3.04414	2.85776	0.916674	2.17209	1.18071	9.0849	5.3431	3.73218	4.57875	3.21027	4.78393	2.20245	0.115958	0
srna3496586	GAGCCCTGATGATGCCCACTCCTGAGC	27	1	chr9	139908202	139908228	-	EXACT	refGene	NM_001606	ABCA2	139901685	139922740	-	Homo sapiens ATP-binding cassette, sub-family A (ABC1), member 2 (ABCA2), transcript variant 1, mRNA.	23	20	21	39	12	18	17	20	5	6	2	13.8843	8.83327	29.6804	12.8599	15.5835	16.1683	1.18071	16.518	3.8165	4.47861	15.0445	16.0514	8.20766	0.50764	0.132834	0
srna3496586	GAGCCCTGATGATGCCCACTCCTGAGC	27	1	chr9	139908202	139908228	-	EXACT	refGene	NM_212533	ABCA2	139901685	139923374	-	Homo sapiens ATP-binding cassette, sub-family A (ABC1), member 2 (ABCA2), transcript variant 2, mRNA.	23	20	21	39	12	18	17	20	5	6	2	13.8843	8.83327	29.6804	12.8599	15.5835	16.1683	1.18071	16.518	3.8165	4.47861	15.0445	16.0514	8.20766	0.50764	0.132834	0
srna1089888	AGCCCTGATGATGCCCACTCCTGAGC	26	1	chr9	139908202	139908227	-	EXACT	refGene	NM_001606	ABCA2	139901685	139922740	-	Homo sapiens ATP-binding cassette, sub-family A (ABC1), member 2 (ABCA2), transcript variant 1, mRNA.	21	15	22	27	8	19	20	23	8	5		14.5455	5.88885	20.5479	13.5743	18.3335	14.578	0	12.3885	6.1064	3.73218	13.7363	18.4591	7.19267	0.493392	0.0751769	0
srna1089888	AGCCCTGATGATGCCCACTCCTGAGC	26	1	chr9	139908202	139908227	-	EXACT	refGene	NM_212533	ABCA2	139901685	139923374	-	Homo sapiens ATP-binding cassette, sub-family A (ABC1), member 2 (ABCA2), transcript variant 2, mRNA.	21	15	22	27	8	19	20	23	8	5		14.5455	5.88885	20.5479	13.5743	18.3335	14.578	0	12.3885	6.1064	3.73218	13.7363	18.4591	7.19267	0.493392	0.0751769	0
srna5485390	TGCCCGGCCTCGGAACCAGCTT	22	1	chr9	139902017	139902038	-	EXACT	refGene	NM_001606	ABCA2	139901685	139922740	-	Homo sapiens ATP-binding cassette, sub-family A (ABC1), member 2 (ABCA2), transcript variant 1, mRNA.	19	20	22	10	7	9	5	13	7	6	16	14.5455	5.15274	7.61035	6.42995	4.58337	7.66437	9.44566	16.518	5.3431	4.47861	12.428	10.4334	9.64269	1.25812	0.511204	0
srna5485390	TGCCCGGCCTCGGAACCAGCTT	22	1	chr9	139902017	139902038	-	EXACT	refGene	NM_212533	ABCA2	139901685	139923374	-	Homo sapiens ATP-binding cassette, sub-family A (ABC1), member 2 (ABCA2), transcript variant 2, mRNA.	19	20	22	10	7	9	5	13	7	6	16	14.5455	5.15274	7.61035	6.42995	4.58337	7.66437	9.44566	16.518	5.3431	4.47861	12.428	10.4334	9.64269	1.25812	0.511204	0
srna5485383	TGCCCGGCCTCGGAACCAGCT	21	1	chr9	139902018	139902038	-	EXACT	refGene	NM_001606	ABCA2	139901685	139922740	-	Homo sapiens ATP-binding cassette, sub-family A (ABC1), member 2 (ABCA2), transcript variant 1, mRNA.	8	12	12	11	2	8	3	16	3	3	8	7.93388	1.47221	8.37139	5.71551	2.75002	5.2486	4.72283	9.9108	2.2899	2.23931	5.23286	12.8411	4.87914	0.929607	0.855173	0
srna5485383	TGCCCGGCCTCGGAACCAGCT	21	1	chr9	139902018	139902038	-	EXACT	refGene	NM_212533	ABCA2	139901685	139923374	-	Homo sapiens ATP-binding cassette, sub-family A (ABC1), member 2 (ABCA2), transcript variant 2, mRNA.	8	12	12	11	2	8	3	16	3	3	8	7.93388	1.47221	8.37139	5.71551	2.75002	5.2486	4.72283	9.9108	2.2899	2.23931	5.23286	12.8411	4.87914	0.929607	0.855173	0
srna5485398	TGCCCGGCCTCGGAACCAGCTTT	23	1	chr9	139902016	139902038	-	EXACT	refGene	NM_001606	ABCA2	139901685	139922740	-	Homo sapiens ATP-binding cassette, sub-family A (ABC1), member 2 (ABCA2), transcript variant 1, mRNA.	4	5	12	5	4	8	1	6	3	1	3	7.93388	2.94442	3.80518	5.71551	0.916674	4.26313	1.77106	4.1295	2.2899	0.746436	2.61643	4.81541	2.31067	0.542011	0.192838	0
srna5485398	TGCCCGGCCTCGGAACCAGCTTT	23	1	chr9	139902016	139902038	-	EXACT	refGene	NM_212533	ABCA2	139901685	139923374	-	Homo sapiens ATP-binding cassette, sub-family A (ABC1), member 2 (ABCA2), transcript variant 2, mRNA.	4	5	12	5	4	8	1	6	3	1	3	7.93388	2.94442	3.80518	5.71551	0.916674	4.26313	1.77106	4.1295	2.2899	0.746436	2.61643	4.81541	2.31067	0.542011	0.192838	0
srna5485378	TGCCCGGCCTCGGAACCAGC	20	1	chr9	139902019	139902038	-	EXACT	refGene	NM_001606	ABCA2	139901685	139922740	-	Homo sapiens ATP-binding cassette, sub-family A (ABC1), member 2 (ABCA2), transcript variant 1, mRNA.	2	9	10	7	2	4	5	6	2		6	6.61157	1.47221	5.32725	2.85776	4.58337	4.17043	3.54212	7.4331	1.5266	0	1.30822	4.81541	2.76201	0.662284	0.402756	0
srna5485378	TGCCCGGCCTCGGAACCAGC	20	1	chr9	139902019	139902038	-	EXACT	refGene	NM_212533	ABCA2	139901685	139923374	-	Homo sapiens ATP-binding cassette, sub-family A (ABC1), member 2 (ABCA2), transcript variant 2, mRNA.	2	9	10	7	2	4	5	6	2		6	6.61157	1.47221	5.32725	2.85776	4.58337	4.17043	3.54212	7.4331	1.5266	0	1.30822	4.81541	2.76201	0.662284	0.402756	0
srna3725673	GCATTGGTGGTTCAGTGGTAGAATTCTCACCT	32	1	chr1	229673604	229673635	+	EXACT	refGene	NM_012089	ABCB10	229652328	229694442	-	Homo sapiens ATP-binding cassette, sub-family B (MDR/TAP), member 10 (ABCB10), nuclear gene encoding mitochondrial protein, mRNA.	169	177	224	180	228	244	129	123	195	194	616	148.099	167.832	136.986	174.323	118.251	149.098	363.658	146.184	148.844	144.809	110.544	98.7159	182.808	1.22609	0.50847	1
srna3725663	GCATTGGTGGTTCAGTGGTAGAATTCTCACC	31	1	chr1	229673604	229673634	+	EXACT	refGene	NM_012089	ABCB10	229652328	229694442	-	Homo sapiens ATP-binding cassette, sub-family B (MDR/TAP), member 10 (ABCB10), nuclear gene encoding mitochondrial protein, mRNA.	50	46	134	97	67	100	65	65	100	144	223	88.595	49.3191	73.8204	71.4439	59.5838	68.5524	131.649	37.9914	76.3301	107.487	32.7054	52.1669	77.2325	1.12662	0.687738	0
srna3725680	GCATTGGTGGTTCAGTGGTAGAATTCTCACCTGC	34	1	chr1	229673604	229673637	+	EXACT	refGene	NM_012089	ABCB10	229652328	229694442	-	Homo sapiens ATP-binding cassette, sub-family B (MDR/TAP), member 10 (ABCB10), nuclear gene encoding mitochondrial protein, mRNA.	57	43	63	59	64	75	47	20	42	41	39	41.6529	47.1108	44.9011	53.5829	43.0837	46.0663	23.0238	35.5137	32.0586	30.6039	37.2841	16.0514	31.6968	0.68807	0.00232505	0
srna3734839	GCATTTGTGGTTCAGTGGTAGAATTCTCACCT	32	1	chr1	229673604	229673635	+	EXACT	refGene	NM_012089	ABCB10	229652328	229694442	-	Homo sapiens ATP-binding cassette, sub-family B (MDR/TAP), member 10 (ABCB10), nuclear gene encoding mitochondrial protein, mRNA.	31	19	32	36	48	41	19	25	25	35	109	21.157	35.3331	27.3973	29.292	17.4168	26.1192	64.3485	15.6921	19.0825	26.1253	20.2773	20.0642	29.1052	1.11432	0.766142	0
srna3734835	GCATTTGTGGTTCAGTGGTAGAATTCTCACC	31	1	chr1	229673604	229673634	+	EXACT	refGene	NM_012089	ABCB10	229652328	229694442	-	Homo sapiens ATP-binding cassette, sub-family B (MDR/TAP), member 10 (ABCB10), nuclear gene encoding mitochondrial protein, mRNA.	3	4	23	8	15	8	13	12	12	21	42	15.2066	11.0416	6.08828	5.71551	11.9168	9.99375	24.7949	3.3036	9.15961	15.6752	1.96232	9.63082	10.9791	1.0986	0.83798	0
srna3725664	GCATTGGTGGTTCAGTGGTAGAATTCTCACCA	32	1	chr1	229673604	229673634	+	CLIPPED	refGene	NM_012089	ABCB10	229652328	229694442	-	Homo sapiens ATP-binding cassette, sub-family B (MDR/TAP), member 10 (ABCB10), nuclear gene encoding mitochondrial protein, mRNA.	9	3	13	11	11	10	6	2	13	6	15	8.59504	8.09717	8.37139	7.14439	5.50005	7.54161	8.8553	2.4777	9.92291	4.47861	5.88697	1.60514	6.3243	0.838588	0.447874	0
srna3725658	GCATTGGTGGTTCAGTGGTAGAATTCTCAC	30	1	chr1	229673604	229673633	+	EXACT	refGene	NM_012089	ABCB10	229652328	229694442	-	Homo sapiens ATP-binding cassette, sub-family B (MDR/TAP), member 10 (ABCB10), nuclear gene encoding mitochondrial protein, mRNA.	12	15	7	6	9	14	8	9	13	30	45	4.6281	6.62495	4.56621	10.0021	7.33339	6.63096	26.5659	12.3885	9.92291	22.3931	7.84929	7.22311	15.8239	2.38637	0.0646261	0
srna2169042	CATTGGTGGTTCAGTGGTAGAATTCTCACCT	31	1	chr1	229673605	229673635	+	EXACT	refGene	NM_012089	ABCB10	229652328	229694442	-	Homo sapiens ATP-binding cassette, sub-family B (MDR/TAP), member 10 (ABCB10), nuclear gene encoding mitochondrial protein, mRNA.	14	10	10	9	10	11	4	12	7	10	24	6.61157	7.36106	6.84932	7.85883	3.6667	6.46949	14.1685	8.259	5.3431	7.46436	9.15751	9.63082	8.87849	1.37236	0.192833	0
srna3734841	GCATTTGTGGTTCAGTGGTAGAATTCTCACCTGC	34	1	chr1	229673604	229673637	+	EXACT	refGene	NM_012089	ABCB10	229652328	229694442	-	Homo sapiens ATP-binding cassette, sub-family B (MDR/TAP), member 10 (ABCB10), nuclear gene encoding mitochondrial protein, mRNA.	15	2	6	3	9	16	5	5	5	9	4	3.96694	6.62495	2.28311	11.431	4.58337	5.77788	2.36141	1.6518	3.8165	6.71792	9.81162	4.01284	4.87185	0.84319	0.688856	0
srna3725678	GCATTGGTGGTTCAGTGGTAGAATTCTCACCTG	33	1	chr1	229673604	229673636	+	EXACT	refGene	NM_012089	ABCB10	229652328	229694442	-	Homo sapiens ATP-binding cassette, sub-family B (MDR/TAP), member 10 (ABCB10), nuclear gene encoding mitochondrial protein, mRNA.	6	7	5	3	11	5	3	6	9	3	19	3.30579	8.09717	2.28311	3.57219	2.75002	4.00165	11.2167	5.7813	6.8697	2.23931	3.92465	4.81541	6.00634	1.50096	0.313937	0
srna3731550	GCATTGTGGTTCAGTGGTAGAATTCTCACCT	31	1	chr1	229673604	229673635	+	MISMATCH/INDEL	refGene	NM_012089	ABCB10	229652328	229694442	-	Homo sapiens ATP-binding cassette, sub-family B (MDR/TAP), member 10 (ABCB10), nuclear gene encoding mitochondrial protein, mRNA.	6	7	8	4	7	3	1	4	5	4	17	5.28926	5.15274	3.04414	2.14332	0.916674	3.30923	10.036	5.7813	3.8165	2.98574	3.92465	3.21027	5.30884	1.60425	0.231485	0
srna2169039	CATTGGTGGTTCAGTGGTAGAATTCTCACC	30	1	chr1	229673605	229673634	+	EXACT	refGene	NM_012089	ABCB10	229652328	229694442	-	Homo sapiens ATP-binding cassette, sub-family B (MDR/TAP), member 10 (ABCB10), nuclear gene encoding mitochondrial protein, mRNA.	4	3	5	4	2	8	3	3	2	5	11	3.30579	1.47221	3.04414	5.71551	2.75002	3.25753	6.49389	2.4777	1.5266	3.73218	2.61643	2.4077	3.36936	1.03433	0.921616	0
srna3729262	GCATTGGTGGTTTAGTGGTAGAATTCTCACCT	32	1	chr1	229673604	229673635	+	EXACT	refGene	NM_012089	ABCB10	229652328	229694442	-	Homo sapiens ATP-binding cassette, sub-family B (MDR/TAP), member 10 (ABCB10), nuclear gene encoding mitochondrial protein, mRNA.			12		1			1			1	7.93388	0.736106	0	0	0	1.734	0.590354	0	0	0	0	0.802568	0.118071	0.0680916	0.358436	0
srna3180587	CTTAACCGCTCTGACC	16	1	chr16	16269916	16269931	+	EXACT	refGene	NM_001171	ABCC6	16243421	16317328	-	Homo sapiens ATP-binding cassette, sub-family C (CFTR/MRP), member 6 (ABCC6), transcript variant 1, mRNA.	4	3	21	22	19	11	15	30	19	11	7	13.8843	13.986	16.7428	7.85883	13.7501	13.2444	4.13248	2.4777	14.5027	8.21079	2.61643	24.077	6.38802	0.482319	0.0398389	0
srna3180585	CTTAACCGCTCTGAC	15	1	chr16	16269916	16269930	+	EXACT	refGene	NM_001171	ABCC6	16243421	16317328	-	Homo sapiens ATP-binding cassette, sub-family C (CFTR/MRP), member 6 (ABCC6), transcript variant 1, mRNA.			11	7	3	1	8	4	3	4	1	7.27273	2.20832	5.32725	0.714439	7.33339	4.57122	0.590354	0	2.2899	2.98574	0	3.21027	1.1732	0.256649	0.0638295	0
srna2296148	CCCATGGGGACGAGA	15	1	chr20	25351863	25351877	-	EXACT	refGene	NM_001042472	ABHD12	25280833	25371618	-	Homo sapiens abhydrolase domain containing 12 (ABHD12), transcript variant 1, mRNA.				16								0	0	12.1766	0	0	2.43531	0	0	0	0	0	0	0	0	0.373901	0
srna2296148	CCCATGGGGACGAGA	15	1	chr20	25351863	25351877	-	EXACT	refGene	NM_015600	ABHD12	25275378	25371618	-	Homo sapiens abhydrolase domain containing 12 (ABHD12), transcript variant 2, mRNA.				16								0	0	12.1766	0	0	2.43531	0	0	0	0	0	0	0	0	0.373901	0
srna1719952	ATTGTGGTTCAGTGGTAGAATTCTCGCCT	29	1	chr2	204229170	204229198	-	EXACT	refGene	NM_005759	ABI2	204193002	204296892	+	Homo sapiens abl-interactor 2 (ABI2), mRNA.	1313	2776	1974	1516	1507	2191	1576	2197	1686	1680	2725	1305.12	1109.31	1153.73	1565.34	1444.68	1315.64	1608.71	2292.7	1286.92	1254.01	858.844	1763.24	1460.24	1.10991	0.59466	1
srna3652433	GCAATGGTGGTTCAGTGGTAGAATTCTCGCCT	32	1	chr2	204229170	204229201	-	EXACT	refGene	NM_005759	ABI2	204193002	204296892	+	Homo sapiens abl-interactor 2 (ABI2), mRNA.	445	431	472	431	554	564	295	359	420	463	1396	312.066	407.803	328.006	402.943	270.419	344.247	824.134	355.963	320.586	345.6	291.078	288.122	427.472	1.24176	0.460295	1
srna1830536	CAATGGTGGTTCAGTGGTAGAATTCTCGCCT	31	1	chr2	204229170	204229200	-	EXACT	refGene	NM_005759	ABI2	204193002	204296892	+	Homo sapiens abl-interactor 2 (ABI2), mRNA.	227	195	236	232	258	289	147	156	163	218	707	156.033	189.915	176.56	206.473	134.751	172.746	417.38	161.051	124.418	162.723	148.482	125.201	202.811	1.17404	0.614266	1
srna1719945	ATTGTGGTTCAGTGGTAGAATTCTCGCC	28	1	chr2	204229171	204229198	-	EXACT	refGene	NM_005759	ABI2	204193002	204296892	+	Homo sapiens abl-interactor 2 (ABI2), mRNA.	120	164	154	154	114	159	121	205	121	193	220	101.818	83.9161	117.199	113.596	110.918	105.489	129.878	135.448	92.3594	144.062	78.4929	164.526	116.048	1.10009	0.487084	1
srna527778	AATGGTGGTTCAGTGGTAGAATTCTCGCCT	30	1	chr2	204229170	204229199	-	EXACT	refGene	NM_005759	ABI2	204193002	204296892	+	Homo sapiens abl-interactor 2 (ABI2), mRNA.	69	64	106	78	95	108	59	81	61	95	258	70.0826	69.9301	59.3607	77.1594	54.0838	66.1233	152.311	52.8576	46.5613	70.9114	45.1334	65.008	73.555	1.11239	0.735619	0
srna3652426	GCAATGGTGGTTCAGTGGTAGAATTCTCGCC	31	1	chr2	204229171	204229201	-	EXACT	refGene	NM_005759	ABI2	204193002	204296892	+	Homo sapiens abl-interactor 2 (ABI2), mRNA.	91	68	71	64	77	92	39	72	61	146	343	46.9421	56.6802	48.7062	65.7284	35.7503	50.7614	202.491	56.1612	46.5613	108.98	59.5238	57.7849	94.7435	1.86645	0.205912	0
srna3653120	GCAATTGTGGTTCAGTGGTAGAATTCTCGCCT	32	1	chr2	204229170	204229201	-	EXACT	refGene	NM_005759	ABI2	204193002	204296892	+	Homo sapiens abl-interactor 2 (ABI2), mRNA.	62	47	77	66	65	87	32	59	55	73	212	50.9091	47.8469	50.2283	62.1562	29.3336	48.0948	125.155	38.8173	41.9815	54.4898	40.5547	47.3515	60.1997	1.25169	0.516538	0
srna3652318	GCAATGGTGGTTCAGTGG	18	1	chr2	204229184	204229201	-	EXACT	refGene	NM_005759	ABI2	204193002	204296892	+	Homo sapiens abl-interactor 2 (ABI2), mRNA.	74	77	72	40	43	82	61	59	71	75	75	47.6033	31.6526	30.4414	58.584	55.9171	44.8397	44.2765	63.5943	54.1943	55.9827	48.404	47.3515	53.2904	1.18846	0.257187	0
srna1830532	CAATGGTGGTTCAGTGGTAGAATTCTCGCC	30	1	chr2	204229171	204229200	-	EXACT	refGene	NM_005759	ABI2	204193002	204296892	+	Homo sapiens abl-interactor 2 (ABI2), mRNA.	42	25	43	49	42	44	20	39	35	69	192	28.4298	30.9165	37.2907	31.4353	18.3335	29.2811	113.348	20.6475	26.7155	51.5041	27.4725	31.3002	47.9375	1.63715	0.342064	0
srna1719940	ATTGTGGTTCAGTGGTAGAATTCTCGC	27	1	chr2	204229172	204229198	-	EXACT	refGene	NM_005759	ABI2	204193002	204296892	+	Homo sapiens abl-interactor 2 (ABI2), mRNA.	41	29	39	34	39	32	23	35	28	35	47	25.7851	28.7081	25.8752	22.862	21.0835	24.8628	27.7466	23.9511	21.3724	26.1253	26.8184	28.0899	25.2028	1.01367	0.850752	0
srna1833795	CAATTGTGGTTCAGTGGTAGAATTCTCGCCT	31	1	chr2	204229170	204229200	-	EXACT	refGene	NM_005759	ABI2	204193002	204296892	+	Homo sapiens abl-interactor 2 (ABI2), mRNA.	37	19	42	28	36	37	19	24	45	41	113	27.7686	26.4998	21.309	26.4342	17.4168	23.8857	66.71	15.6921	34.3485	30.6039	24.202	19.2616	34.3113	1.43648	0.301528	0
srna1830471	CAATGGTGGTTCAGTGGTAGAAATCTCGCCT	31	1	chr2	204229170	204229200	-	EXACT	refGene	NM_005759	ABI2	204193002	204296892	+	Homo sapiens abl-interactor 2 (ABI2), mRNA.	12	10	25	18	24	24	14	17	14	22	65	16.5289	17.6665	13.6986	17.1465	12.8334	15.5748	38.373	8.259	10.6862	16.4216	7.84929	13.6437	16.3178	1.04771	0.903987	0
srna1719924	ATTGTGGTTCAGTGGTAGAATTCTC	25	1	chr2	204229174	204229198	-	EXACT	refGene	NM_005759	ABI2	204193002	204296892	+	Homo sapiens abl-interactor 2 (ABI2), mRNA.	22	23	26	18	13	19	26	24	8	11	13	17.1901	9.56938	13.6986	13.5743	23.8335	15.5732	7.6746	18.9957	6.1064	8.21079	14.3904	19.2616	11.0756	0.711195	0.223718	0
srna1719935	ATTGTGGTTCAGTGGTAGAATTCTCG	26	1	chr2	204229173	204229198	-	EXACT	refGene	NM_005759	ABI2	204193002	204296892	+	Homo sapiens abl-interactor 2 (ABI2), mRNA.	19	19	15	19	13	20	17	16	9	20	15	9.91736	9.56938	14.4597	14.2888	15.5835	12.7637	8.8553	15.6921	6.8697	14.9287	12.428	12.8411	11.7548	0.920952	0.647733	0
srna527773	AATGGTGGTTCAGTGGTAGAATTCTCGCC	29	1	chr2	204229171	204229199	-	EXACT	refGene	NM_005759	ABI2	204193002	204296892	+	Homo sapiens abl-interactor 2 (ABI2), mRNA.	25	10	25	19	18	18	4	14	14	28	61	16.5289	13.2499	14.4597	12.8599	3.6667	12.153	36.0116	8.259	10.6862	20.9002	16.3527	11.236	18.4419	1.51748	0.290913	0
srna1616079	ATGGTGGTTCAGTGGTAGAATTCTCGCCT	29	1	chr2	204229170	204229198	-	EXACT	refGene	NM_005759	ABI2	204193002	204296892	+	Homo sapiens abl-interactor 2 (ABI2), mRNA.	17	22	17	6	19	27	12	18	19	14	43	11.2397	13.986	4.56621	19.2898	11.0001	12.0164	25.3852	18.1698	14.5027	10.4501	11.1198	14.4462	15.9255	1.32532	0.313485	0
srna1769074	CAAAGGTGGTTCAGTGGTAGAATTCTCGCCT	31	1	chr2	204229170	204229200	-	EXACT	refGene	NM_005759	ABI2	204193002	204296892	+	Homo sapiens abl-interactor 2 (ABI2), mRNA.	28	6	17	18	18	24	4	19	10	14	29	11.2397	13.2499	13.6986	17.1465	3.6667	11.8003	17.1203	4.9554	7.63301	10.4501	18.315	15.2488	11.6948	0.991057	0.976336	0
srna3652714	GCAATGTGGTTCAGTGGTAGAATTCTCGCCT	31	1	chr2	204229170	204229201	-	MISMATCH/INDEL	refGene	NM_005759	ABI2	204193002	204296892	+	Homo sapiens abl-interactor 2 (ABI2), mRNA.	19	22	18	18	16	18	8	16	14	9	40	11.9008	11.7777	13.6986	12.8599	7.33339	11.5141	23.6141	18.1698	10.6862	6.71792	12.428	12.8411	14.3232	1.24397	0.414473	0
srna554680	AATTGTGGTTCAGTGGTAGAATTCTCGCCT	30	1	chr2	204229170	204229199	-	EXACT	refGene	NM_005759	ABI2	204193002	204296892	+	Homo sapiens abl-interactor 2 (ABI2), mRNA.	11	2	18	10	18	10	16	10	11	11	40	11.9008	13.2499	7.61035	7.14439	14.6668	10.9145	23.6141	1.6518	8.39631	8.21079	7.19519	8.02568	9.81365	0.899142	0.79167	0
srna1830562	CAATGGTGGTTCAGTGGTAGAATTGTCGCCT	31	1	chr2	204229170	204229200	-	EXACT	refGene	NM_005759	ABI2	204193002	204296892	+	Homo sapiens abl-interactor 2 (ABI2), mRNA.	7	9	18	10	21	18	5	9	7	7	51	11.9008	15.4582	7.61035	12.8599	4.58337	10.4825	30.108	7.4331	5.3431	5.22505	4.57875	7.22311	10.5376	1.00525	0.992074	0
srna133456	AAAGGTGGTTCAGTGGTAGAATTCTCGCCT	30	1	chr2	204229170	204229199	-	EXACT	refGene	NM_005759	ABI2	204193002	204296892	+	Homo sapiens abl-interactor 2 (ABI2), mRNA.	19	13	10	13	17	21	6	6	7	16	25	6.61157	12.5138	9.89346	15.0032	5.50005	9.90442	14.7588	10.7367	5.3431	11.943	12.428	4.81541	11.0419	1.11485	0.644045	0
srna3653117	GCAATTGTGGTTCAGTGGTAGAATTCTCGCC	31	1	chr2	204229171	204229201	-	EXACT	refGene	NM_005759	ABI2	204193002	204296892	+	Homo sapiens abl-interactor 2 (ABI2), mRNA.	11	7	10	8	8	14	11	10	6	26	39	6.61157	5.88885	6.08828	10.0021	10.0834	7.73485	23.0238	5.7813	4.5798	19.4073	7.19519	8.02568	11.9975	1.55109	0.334489	0
srna3652422	GCAATGGTGGTTCAGTGGTAGAATTCTCGC	30	1	chr2	204229172	204229201	-	EXACT	refGene	NM_005759	ABI2	204193002	204296892	+	Homo sapiens abl-interactor 2 (ABI2), mRNA.	16	8	17	4	10	10	8	19	15	16	47	11.2397	7.36106	3.04414	7.14439	7.33339	7.22453	27.7466	6.6072	11.4495	11.943	10.4657	15.2488	13.6424	1.88834	0.158375	0
srna3642480	GCAAAGGTGGTTCAGTGGTAGAATTCTCGCCT	32	1	chr2	204229170	204229201	-	EXACT	refGene	NM_005759	ABI2	204193002	204296892	+	Homo sapiens abl-interactor 2 (ABI2), mRNA.	7	3	6	10	17	4	6	8	7	10	28	3.96694	12.5138	7.61035	2.85776	5.50005	6.48978	16.5299	2.4777	5.3431	7.46436	4.57875	6.42055	7.27876	1.12157	0.798771	0
srna1432395	ATAGTGGTTCAGTGGTAGAATTCTCGCCT	29	1	chr2	204229170	204229198	-	EXACT	refGene	NM_005759	ABI2	204193002	204296892	+	Homo sapiens abl-interactor 2 (ABI2), mRNA.	5	6	5	7	4	15	9	6	3	2	18	3.30579	2.94442	5.32725	10.7166	8.25007	6.10882	10.6264	4.9554	2.2899	1.49287	3.27054	4.81541	4.52702	0.741062	0.49422	0
srna3652427	GCAATGGTGGTTCAGTGGTAGAATTCTCGCCA	32	1	chr2	204229171	204229201	-	CLIPPED	refGene	NM_005759	ABI2	204193002	204296892	+	Homo sapiens abl-interactor 2 (ABI2), mRNA.	8	1	10	4	11	13	3	3	3	7	12	6.61157	8.09717	3.04414	9.2877	2.75002	5.95812	7.08424	0.8259	2.2899	5.22505	5.23286	2.4077	4.13159	0.693439	0.324361	0
srna527734	AATGGTGGTTCAGTGGTAGAAATCTCGCCT	30	1	chr2	204229170	204229199	-	EXACT	refGene	NM_005759	ABI2	204193002	204296892	+	Homo sapiens abl-interactor 2 (ABI2), mRNA.	6	4	7	6	7	10	9	11	9	5	27	4.6281	5.15274	4.56621	7.14439	8.25007	5.9483	15.9395	3.3036	6.8697	3.73218	3.92465	8.82825	6.75394	1.13544	0.760392	0
srna2143828	CATGGTGGTTCAGTGGTAGAATTCTCGCCT	30	1	chr2	204229170	204229198	-	CLIPPED	refGene	NM_005759	ABI2	204193002	204296892	+	Homo sapiens abl-interactor 2 (ABI2), mRNA.	10	11	9	6	6	10	6	2	4	9	14	5.95041	4.41664	4.56621	7.14439	5.50005	5.51554	8.26495	9.0849	3.0532	6.71792	6.54108	1.60514	6.73241	1.22063	0.332026	0
srna1830528	CAATGGTGGTTCAGTGGTAGAATTCTCGC	29	1	chr2	204229172	204229200	-	EXACT	refGene	NM_005759	ABI2	204193002	204296892	+	Homo sapiens abl-interactor 2 (ABI2), mRNA.	6	3	8	6	9	10	4	12	5	11	30	5.28926	6.62495	4.56621	7.14439	3.6667	5.4583	17.7106	2.4777	3.8165	8.21079	3.92465	9.63082	7.22805	1.32423	0.567218	0
srna1790736	CAACGGTGGTTCAGTGGTAGAATTCTCGCCT	31	1	chr2	204229170	204229200	-	EXACT	refGene	NM_005759	ABI2	204193002	204296892	+	Homo sapiens abl-interactor 2 (ABI2), mRNA.	3	3	3	10	8	6	7	6	5	4	11	1.98347	5.88885	7.61035	4.28663	6.41672	5.2372	6.49389	2.4777	3.8165	2.98574	1.96232	4.81541	3.54723	0.677314	0.217462	0
srna3652406	GCAATGGTGGTTCAGTGGTAGAATTCT	27	1	chr2	204229175	204229201	-	EXACT	refGene	NM_005759	ABI2	204193002	204296892	+	Homo sapiens abl-interactor 2 (ABI2), mRNA.	4	25	13	4	3	8	7	8	9	4	3	8.59504	2.20832	3.04414	5.71551	6.41672	5.19595	1.77106	20.6475	6.8697	2.98574	2.61643	6.42055	6.97809	1.34299	0.652141	0
srna3652429	GCAATGGTGGTTCAGTGGTAGAATTCTCGCCC	32	1	chr2	204229171	204229201	-	CLIPPED	refGene	NM_005759	ABI2	204193002	204296892	+	Homo sapiens abl-interactor 2 (ABI2), mRNA.	4	1	3	6	8	10	6	2	5	5	10	1.98347	5.88885	4.56621	7.14439	5.50005	5.01659	5.90354	0.8259	3.8165	3.73218	2.61643	1.60514	3.37891	0.673547	0.208923	0
srna3652419	GCAATGGTGGTTCAGTGGTAGAATTCTCG	29	1	chr2	204229173	204229201	-	EXACT	refGene	NM_005759	ABI2	204193002	204296892	+	Homo sapiens abl-interactor 2 (ABI2), mRNA.	8	9	6	3	7	12	4	4	5	6	16	3.96694	5.15274	2.28311	8.57327	3.6667	4.72855	9.44566	7.4331	3.8165	4.47861	5.23286	3.21027	6.08135	1.28609	0.389506	0
srna1508078	ATCGTGGTTCAGTGGTAGAATTCTCGCCT	29	1	chr2	204229170	204229198	-	EXACT	refGene	NM_005759	ABI2	204193002	204296892	+	Homo sapiens abl-interactor 2 (ABI2), mRNA.	8	4	2	6	10	8	5	13	3	7	22	1.32231	7.36106	4.56621	5.71551	4.58337	4.70969	12.9878	3.3036	2.2899	5.22505	5.23286	10.4334	5.80784	1.23317	0.623855	0
srna3652357	GCAATGGTGGTTCAGTGGTAGAAATCTCGCCT	32	1	chr2	204229170	204229201	-	EXACT	refGene	NM_005759	ABI2	204193002	204296892	+	Homo sapiens abl-interactor 2 (ABI2), mRNA.	1	11	7	8	7	4	5	7	8	11	24	4.6281	5.15274	6.08828	2.85776	4.58337	4.66205	14.1685	9.0849	6.1064	8.21079	0.654108	5.61798	7.64494	1.63982	0.249725	0
srna1831404	CAATGTGGTTCAGTGGTAGAATTCTCGCCT	30	1	chr2	204229170	204229200	-	MISMATCH/INDEL	refGene	NM_005759	ABI2	204193002	204296892	+	Homo sapiens abl-interactor 2 (ABI2), mRNA.	9	10	6	3	10	5	5	4	9	3	20	3.96694	7.36106	2.28311	3.57219	4.58337	4.35333	11.8071	8.259	6.8697	2.23931	5.88697	3.21027	7.01241	1.61081	0.182844	0
srna1833792	CAATTGTGGTTCAGTGGTAGAATTCTCGCC	30	1	chr2	204229171	204229200	-	EXACT	refGene	NM_005759	ABI2	204193002	204296892	+	Homo sapiens abl-interactor 2 (ABI2), mRNA.	5	3	9	4	7	5	4	5	1	16	29	5.95041	5.15274	3.04414	3.57219	3.6667	4.27724	17.1203	2.4777	0.763301	11.943	3.27054	4.01284	7.11495	1.66345	0.423904	0
srna1830493	CAATGGTGGTTCAGTGGTAGAAGTCTCGCCT	31	1	chr2	204229170	204229200	-	EXACT	refGene	NM_005759	ABI2	204193002	204296892	+	Homo sapiens abl-interactor 2 (ABI2), mRNA.	3	2	5	1	9	9	4	6	7	5	13	3.30579	6.62495	0.761035	6.42995	3.6667	4.15768	7.6746	1.6518	5.3431	3.73218	1.96232	4.81541	4.0728	0.979584	0.957985	0
srna1830570	CAATGGTGGTTCAGTGGTAGAATTTTCGCCT	31	1	chr2	204229170	204229200	-	EXACT	refGene	NM_005759	ABI2	204193002	204296892	+	Homo sapiens abl-interactor 2 (ABI2), mRNA.	9	6	5	5	8	5	3	4	2	6	19	3.30579	5.88885	3.80518	3.57219	2.75002	3.86441	11.2167	4.9554	1.5266	4.47861	5.88697	3.21027	5.61286	1.45245	0.343343	0
srna3731638	GCATTGTGGTTCAGTGGTAGAATTCTCGCCTT	32	1	chr2	204229169	204229195	-	CLIPPED	refGene	NM_005759	ABI2	204193002	204296892	+	Homo sapiens abl-interactor 2 (ABI2), mRNA.	6	3	1	1	11	3	6	3		1	11	0.661157	8.09717	0.761035	2.14332	5.50005	3.43254	6.49389	2.4777	0	0.746436	3.92465	2.4077	2.72853	0.794902	0.716093	0
srna1830484	CAATGGTGGTTCAGTGGTAGAACTCTCGCCT	31	1	chr2	204229170	204229200	-	EXACT	refGene	NM_005759	ABI2	204193002	204296892	+	Homo sapiens abl-interactor 2 (ABI2), mRNA.	3	5	3	6	5	7	2	1	3	4	16	1.98347	3.68053	4.56621	5.00107	1.83335	3.41293	9.44566	4.1295	2.2899	2.98574	1.96232	0.802568	4.16263	1.21966	0.639882	0
srna3652570	GCAATGGTGGTTTAGTGGTAGAATTCTCGCCT	32	1	chr2	204229170	204229201	-	EXACT	refGene	NM_005759	ABI2	204193002	204296892	+	Homo sapiens abl-interactor 2 (ABI2), mRNA.			23			1		1			8	15.2066	0	0	0.714439	0	3.18421	4.72283	0	0	0	0	0.802568	0.944566	0.296641	0.510709	0
srna259552	AACGGTGGTTCAGTGGTAGAATTCTCGCCT	30	1	chr2	204229170	204229199	-	EXACT	refGene	NM_005759	ABI2	204193002	204296892	+	Homo sapiens abl-interactor 2 (ABI2), mRNA.	7	2	3	5	4	7	2	10	3	2	19	1.98347	2.94442	3.80518	5.00107	1.83335	3.1135	11.2167	1.6518	2.2899	1.49287	4.57875	8.02568	4.24601	1.36374	0.58205	0
srna1830510	CAATGGTGGTTCAGTGGTAGAATTATCGCCT	31	1	chr2	204229170	204229200	-	EXACT	refGene	NM_005759	ABI2	204193002	204296892	+	Homo sapiens abl-interactor 2 (ABI2), mRNA.	5	5	6	3	3	6	3	1	5	4	14	3.96694	2.20832	2.28311	4.28663	2.75002	3.099	8.26495	4.1295	3.8165	2.98574	3.27054	0.802568	4.49345	1.44996	0.238749	0
srna527795	AATGGTGGTTCAGTGGTAGAATTGTCGCCT	30	1	chr2	204229170	204229199	-	EXACT	refGene	NM_005759	ABI2	204193002	204296892	+	Homo sapiens abl-interactor 2 (ABI2), mRNA.	3	1	4	4	4	4	2	4	2	1	10	2.64463	2.94442	3.04414	2.85776	1.83335	2.66486	5.90354	0.8259	1.5266	0.746436	1.96232	3.21027	2.19296	0.822918	0.652791	0
srna1830515	CAATGGTGGTTCAGTGGTAGAATTCT	26	1	chr2	204229175	204229200	-	EXACT	refGene	NM_005759	ABI2	204193002	204296892	+	Homo sapiens abl-interactor 2 (ABI2), mRNA.	1	15	3	3	1	6	3	7	11	3	1	1.98347	0.736106	2.28311	4.28663	2.75002	2.40787	0.590354	12.3885	8.39631	2.23931	0.654108	5.61798	4.85372	2.01577	0.366409	0
srna3652710	GCAATGTGGTTCAGTGGTAGAATTCTCGCC	30	1	chr2	204229171	204229201	-	MISMATCH/INDEL	refGene	NM_005759	ABI2	204193002	204296892	+	Homo sapiens abl-interactor 2 (ABI2), mRNA.	4	3	8	2	3	1	2	6	6	4	10	5.28926	2.20832	1.52207	0.714439	1.83335	2.31349	5.90354	2.4777	4.5798	2.98574	2.61643	4.81541	3.71264	1.60478	0.211095	0
srna1830649	CAATGGTGGTTTAGTGGTAGAATTCTCGCCT	31	1	chr2	204229170	204229200	-	EXACT	refGene	NM_005759	ABI2	204193002	204296892	+	Homo sapiens abl-interactor 2 (ABI2), mRNA.			15			1	1					9.91736	0	0	0.714439	0.916674	2.30969	0	0	0	0	0	0	0	0	0.293344	0
srna527772	AATGGTGGTTCAGTGGTAGAATTCTCGC	28	1	chr2	204229172	204229199	-	EXACT	refGene	NM_005759	ABI2	204193002	204296892	+	Homo sapiens abl-interactor 2 (ABI2), mRNA.	5	1	3	2	6	5		5	4	8	12	1.98347	4.41664	1.52207	3.57219	0	2.29887	7.08424	0.8259	3.0532	5.97149	3.27054	4.01284	4.04107	1.75785	0.240175	0
srna3652372	GCAATGGTGGTTCAGTGGTAGAAGTCTCGCCT	32	1	chr2	204229170	204229201	-	EXACT	refGene	NM_005759	ABI2	204193002	204296892	+	Homo sapiens abl-interactor 2 (ABI2), mRNA.	7	5	4	1	6	3	1	1	6	2	20	2.64463	4.41664	0.761035	2.14332	0.916674	2.17646	11.8071	4.1295	4.5798	1.49287	4.57875	0.802568	5.3176	2.44324	0.147483	0
srna1830468	CAATGGTGGTTCAGTGGTAGAAATCTCGCC	30	1	chr2	204229171	204229200	-	EXACT	refGene	NM_005759	ABI2	204193002	204296892	+	Homo sapiens abl-interactor 2 (ABI2), mRNA.	1	2	5	2	3	3	1	1	3	4	13	3.30579	2.20832	1.52207	2.14332	0.916674	2.01923	7.6746	1.6518	2.2899	2.98574	0.654108	0.802568	3.05123	1.51108	0.45825	0
srna1830525	CAATGGTGGTTCAGTGGTAGAATTCTCG	28	1	chr2	204229173	204229200	-	EXACT	refGene	NM_005759	ABI2	204193002	204296892	+	Homo sapiens abl-interactor 2 (ABI2), mRNA.	6	3	3	2	2	3	2	4	3	6	12	1.98347	1.47221	1.52207	2.14332	1.83335	1.79088	7.08424	2.4777	2.2899	4.47861	3.92465	3.21027	4.05102	2.26202	0.0585464	0
srna1769070	CAAAGGTGGTTCAGTGGTAGAATTCTCGCC	30	1	chr2	204229171	204229200	-	EXACT	refGene	NM_005759	ABI2	204193002	204296892	+	Homo sapiens abl-interactor 2 (ABI2), mRNA.	4	2	2	3	4	3		1	2	2	10	1.32231	2.94442	2.28311	2.14332	0	1.73863	5.90354	1.6518	1.5266	1.49287	2.61643	0.802568	2.63825	1.51743	0.392168	0
srna1830559	CAATGGTGGTTCAGTGGTAGAATTGTCGCC	30	1	chr2	204229171	204229200	-	EXACT	refGene	NM_005759	ABI2	204193002	204296892	+	Homo sapiens abl-interactor 2 (ABI2), mRNA.	2		4	1	2	2	1	1	1	8	13	2.64463	1.47221	0.761035	1.42888	0.916674	1.44469	7.6746	0	0.763301	5.97149	1.30822	0.802568	3.14352	2.17592	0.33676	0
srna3651103	GCAATAGTGGTTCAGTGGTAGAATTCTCGCCT	32	1	chr2	204229170	204229201	-	EXACT	refGene	NM_005759	ABI2	204193002	204296892	+	Homo sapiens abl-interactor 2 (ABI2), mRNA.	3		1		2	1	2		4	3	12	0.661157	1.47221	0	0.714439	1.83335	0.936231	7.08424	0	3.0532	2.23931	1.96232	0	2.86782	3.06315	0.176564	0
srna3653115	GCAATTGTGGTTCAGTGGTAGAATTCTCGC	30	1	chr2	204229172	204229201	-	EXACT	refGene	NM_005759	ABI2	204193002	204296892	+	Homo sapiens abl-interactor 2 (ABI2), mRNA.	3	3	3		1	1	1	2		2	10	1.98347	0.736106	0	0.714439	0.916674	0.870138	5.90354	2.4777	0	1.49287	1.96232	1.60514	2.36729	2.72059	0.206441	0
srna5884476	TTCAACGGGTATTTATTGAGC	21	1	chr4	8007040	8007060	-	EXACT	refGene	NM_001130083	ABLIM2	7967036	8160559	-	Homo sapiens actin binding LIM protein family, member 2 (ABLIM2), transcript variant 1, mRNA.	1378	1080	1745	1043	1043	766	762	1392	1466	1529	1998	1153.72	767.759	793.76	547.26	698.506	792.201	1179.53	891.972	1119	1141.3	901.361	1117.17	1046.63	1.32117	0.0692569	1
srna5884476	TTCAACGGGTATTTATTGAGC	21	1	chr4	8007040	8007060	-	EXACT	refGene	NM_001130084	ABLIM2	7967036	8160559	-	Homo sapiens actin binding LIM protein family, member 2 (ABLIM2), transcript variant 2, mRNA.	1378	1080	1745	1043	1043	766	762	1392	1466	1529	1998	1153.72	767.759	793.76	547.26	698.506	792.201	1179.53	891.972	1119	1141.3	901.361	1117.17	1046.63	1.32117	0.0692569	1
srna5884476	TTCAACGGGTATTTATTGAGC	21	1	chr4	8007040	8007060	-	EXACT	refGene	NM_001130085	ABLIM2	7967036	8160559	-	Homo sapiens actin binding LIM protein family, member 2 (ABLIM2), transcript variant 3, mRNA.	1378	1080	1745	1043	1043	766	762	1392	1466	1529	1998	1153.72	767.759	793.76	547.26	698.506	792.201	1179.53	891.972	1119	1141.3	901.361	1117.17	1046.63	1.32117	0.0692569	1
srna5884476	TTCAACGGGTATTTATTGAGC	21	1	chr4	8007040	8007060	-	EXACT	refGene	NM_001130086	ABLIM2	7967036	8160559	-	Homo sapiens actin binding LIM protein family, member 2 (ABLIM2), transcript variant 4, mRNA.	1378	1080	1745	1043	1043	766	762	1392	1466	1529	1998	1153.72	767.759	793.76	547.26	698.506	792.201	1179.53	891.972	1119	1141.3	901.361	1117.17	1046.63	1.32117	0.0692569	1
srna5884476	TTCAACGGGTATTTATTGAGC	21	1	chr4	8007040	8007060	-	EXACT	refGene	NM_001130087	ABLIM2	7967036	8160559	-	Homo sapiens actin binding LIM protein family, member 2 (ABLIM2), transcript variant 5, mRNA.	1378	1080	1745	1043	1043	766	762	1392	1466	1529	1998	1153.72	767.759	793.76	547.26	698.506	792.201	1179.53	891.972	1119	1141.3	901.361	1117.17	1046.63	1.32117	0.0692569	1
srna5884476	TTCAACGGGTATTTATTGAGC	21	1	chr4	8007040	8007060	-	EXACT	refGene	NM_032432	ABLIM2	7967036	8160559	-	Homo sapiens actin binding LIM protein family, member 2 (ABLIM2), transcript variant 6, mRNA.	1378	1080	1745	1043	1043	766	762	1392	1466	1529	1998	1153.72	767.759	793.76	547.26	698.506	792.201	1179.53	891.972	1119	1141.3	901.361	1117.17	1046.63	1.32117	0.0692569	1
srna5884477	TTCAACGGGTATTTATTGAGCA	22	1	chr4	8007039	8007060	-	EXACT	refGene	NM_001130083	ABLIM2	7967036	8160559	-	Homo sapiens actin binding LIM protein family, member 2 (ABLIM2), transcript variant 1, mRNA.	768	411	845	528	674	412	424	562	718	695	888	558.678	496.135	401.826	294.349	388.67	427.932	524.234	339.445	548.05	518.773	502.355	451.043	486.571	1.13703	0.351512	1
srna5884477	TTCAACGGGTATTTATTGAGCA	22	1	chr4	8007039	8007060	-	EXACT	refGene	NM_001130084	ABLIM2	7967036	8160559	-	Homo sapiens actin binding LIM protein family, member 2 (ABLIM2), transcript variant 2, mRNA.	768	411	845	528	674	412	424	562	718	695	888	558.678	496.135	401.826	294.349	388.67	427.932	524.234	339.445	548.05	518.773	502.355	451.043	486.571	1.13703	0.351512	1
srna5884477	TTCAACGGGTATTTATTGAGCA	22	1	chr4	8007039	8007060	-	EXACT	refGene	NM_001130085	ABLIM2	7967036	8160559	-	Homo sapiens actin binding LIM protein family, member 2 (ABLIM2), transcript variant 3, mRNA.	768	411	845	528	674	412	424	562	718	695	888	558.678	496.135	401.826	294.349	388.67	427.932	524.234	339.445	548.05	518.773	502.355	451.043	486.571	1.13703	0.351512	1
srna5884477	TTCAACGGGTATTTATTGAGCA	22	1	chr4	8007039	8007060	-	EXACT	refGene	NM_001130086	ABLIM2	7967036	8160559	-	Homo sapiens actin binding LIM protein family, member 2 (ABLIM2), transcript variant 4, mRNA.	768	411	845	528	674	412	424	562	718	695	888	558.678	496.135	401.826	294.349	388.67	427.932	524.234	339.445	548.05	518.773	502.355	451.043	486.571	1.13703	0.351512	1
srna5884477	TTCAACGGGTATTTATTGAGCA	22	1	chr4	8007039	8007060	-	EXACT	refGene	NM_001130087	ABLIM2	7967036	8160559	-	Homo sapiens actin binding LIM protein family, member 2 (ABLIM2), transcript variant 5, mRNA.	768	411	845	528	674	412	424	562	718	695	888	558.678	496.135	401.826	294.349	388.67	427.932	524.234	339.445	548.05	518.773	502.355	451.043	486.571	1.13703	0.351512	1
srna5884477	TTCAACGGGTATTTATTGAGCA	22	1	chr4	8007039	8007060	-	EXACT	refGene	NM_032432	ABLIM2	7967036	8160559	-	Homo sapiens actin binding LIM protein family, member 2 (ABLIM2), transcript variant 6, mRNA.	768	411	845	528	674	412	424	562	718	695	888	558.678	496.135	401.826	294.349	388.67	427.932	524.234	339.445	548.05	518.773	502.355	451.043	486.571	1.13703	0.351512	1
srna4964691	TCAACGGGTATTTATTGAGC	20	1	chr4	8007040	8007059	-	EXACT	refGene	NM_001130083	ABLIM2	7967036	8160559	-	Homo sapiens actin binding LIM protein family, member 2 (ABLIM2), transcript variant 1, mRNA.	96	79	150	70	67	52	35	97	73	104	148	99.1736	49.3191	53.2725	37.1508	32.0836	54.1999	87.3723	65.2461	55.7209	77.6293	62.7943	77.8491	69.7526	1.28695	0.284178	0
srna4964691	TCAACGGGTATTTATTGAGC	20	1	chr4	8007040	8007059	-	EXACT	refGene	NM_001130084	ABLIM2	7967036	8160559	-	Homo sapiens actin binding LIM protein family, member 2 (ABLIM2), transcript variant 2, mRNA.	96	79	150	70	67	52	35	97	73	104	148	99.1736	49.3191	53.2725	37.1508	32.0836	54.1999	87.3723	65.2461	55.7209	77.6293	62.7943	77.8491	69.7526	1.28695	0.284178	0
srna4964691	TCAACGGGTATTTATTGAGC	20	1	chr4	8007040	8007059	-	EXACT	refGene	NM_001130085	ABLIM2	7967036	8160559	-	Homo sapiens actin binding LIM protein family, member 2 (ABLIM2), transcript variant 3, mRNA.	96	79	150	70	67	52	35	97	73	104	148	99.1736	49.3191	53.2725	37.1508	32.0836	54.1999	87.3723	65.2461	55.7209	77.6293	62.7943	77.8491	69.7526	1.28695	0.284178	0
srna4964691	TCAACGGGTATTTATTGAGC	20	1	chr4	8007040	8007059	-	EXACT	refGene	NM_001130086	ABLIM2	7967036	8160559	-	Homo sapiens actin binding LIM protein family, member 2 (ABLIM2), transcript variant 4, mRNA.	96	79	150	70	67	52	35	97	73	104	148	99.1736	49.3191	53.2725	37.1508	32.0836	54.1999	87.3723	65.2461	55.7209	77.6293	62.7943	77.8491	69.7526	1.28695	0.284178	0
srna4964691	TCAACGGGTATTTATTGAGC	20	1	chr4	8007040	8007059	-	EXACT	refGene	NM_001130087	ABLIM2	7967036	8160559	-	Homo sapiens actin binding LIM protein family, member 2 (ABLIM2), transcript variant 5, mRNA.	96	79	150	70	67	52	35	97	73	104	148	99.1736	49.3191	53.2725	37.1508	32.0836	54.1999	87.3723	65.2461	55.7209	77.6293	62.7943	77.8491	69.7526	1.28695	0.284178	0
srna4964691	TCAACGGGTATTTATTGAGC	20	1	chr4	8007040	8007059	-	EXACT	refGene	NM_032432	ABLIM2	7967036	8160559	-	Homo sapiens actin binding LIM protein family, member 2 (ABLIM2), transcript variant 6, mRNA.	96	79	150	70	67	52	35	97	73	104	148	99.1736	49.3191	53.2725	37.1508	32.0836	54.1999	87.3723	65.2461	55.7209	77.6293	62.7943	77.8491	69.7526	1.28695	0.284178	0
srna5884471	TTCAACGGGTATTTATTGAG	20	1	chr4	8007041	8007060	-	EXACT	refGene	NM_001130083	ABLIM2	7967036	8160559	-	Homo sapiens actin binding LIM protein family, member 2 (ABLIM2), transcript variant 1, mRNA.	44	37	74	39	51	19	39	58	53	73	73	48.9256	37.5414	29.6804	13.5743	35.7503	33.0944	43.0958	30.5583	40.4549	54.4898	28.7807	46.549	39.4759	1.19283	0.416396	0
srna5884471	TTCAACGGGTATTTATTGAG	20	1	chr4	8007041	8007060	-	EXACT	refGene	NM_001130084	ABLIM2	7967036	8160559	-	Homo sapiens actin binding LIM protein family, member 2 (ABLIM2), transcript variant 2, mRNA.	44	37	74	39	51	19	39	58	53	73	73	48.9256	37.5414	29.6804	13.5743	35.7503	33.0944	43.0958	30.5583	40.4549	54.4898	28.7807	46.549	39.4759	1.19283	0.416396	0
srna5884471	TTCAACGGGTATTTATTGAG	20	1	chr4	8007041	8007060	-	EXACT	refGene	NM_001130085	ABLIM2	7967036	8160559	-	Homo sapiens actin binding LIM protein family, member 2 (ABLIM2), transcript variant 3, mRNA.	44	37	74	39	51	19	39	58	53	73	73	48.9256	37.5414	29.6804	13.5743	35.7503	33.0944	43.0958	30.5583	40.4549	54.4898	28.7807	46.549	39.4759	1.19283	0.416396	0
srna5884471	TTCAACGGGTATTTATTGAG	20	1	chr4	8007041	8007060	-	EXACT	refGene	NM_001130086	ABLIM2	7967036	8160559	-	Homo sapiens actin binding LIM protein family, member 2 (ABLIM2), transcript variant 4, mRNA.	44	37	74	39	51	19	39	58	53	73	73	48.9256	37.5414	29.6804	13.5743	35.7503	33.0944	43.0958	30.5583	40.4549	54.4898	28.7807	46.549	39.4759	1.19283	0.416396	0
srna5884471	TTCAACGGGTATTTATTGAG	20	1	chr4	8007041	8007060	-	EXACT	refGene	NM_001130087	ABLIM2	7967036	8160559	-	Homo sapiens actin binding LIM protein family, member 2 (ABLIM2), transcript variant 5, mRNA.	44	37	74	39	51	19	39	58	53	73	73	48.9256	37.5414	29.6804	13.5743	35.7503	33.0944	43.0958	30.5583	40.4549	54.4898	28.7807	46.549	39.4759	1.19283	0.416396	0
srna5884471	TTCAACGGGTATTTATTGAG	20	1	chr4	8007041	8007060	-	EXACT	refGene	NM_032432	ABLIM2	7967036	8160559	-	Homo sapiens actin binding LIM protein family, member 2 (ABLIM2), transcript variant 6, mRNA.	44	37	74	39	51	19	39	58	53	73	73	48.9256	37.5414	29.6804	13.5743	35.7503	33.0944	43.0958	30.5583	40.4549	54.4898	28.7807	46.549	39.4759	1.19283	0.416396	0
srna4964692	TCAACGGGTATTTATTGAGCA	21	1	chr4	8007039	8007059	-	EXACT	refGene	NM_001130083	ABLIM2	7967036	8160559	-	Homo sapiens actin binding LIM protein family, member 2 (ABLIM2), transcript variant 1, mRNA.	40	30	61	39	50	36	26	54	46	56	57	40.3306	36.8053	29.6804	25.7198	23.8335	31.2739	33.6502	24.777	35.1118	41.8004	26.1643	43.3387	32.3007	1.03283	0.823205	0
srna4964692	TCAACGGGTATTTATTGAGCA	21	1	chr4	8007039	8007059	-	EXACT	refGene	NM_001130084	ABLIM2	7967036	8160559	-	Homo sapiens actin binding LIM protein family, member 2 (ABLIM2), transcript variant 2, mRNA.	40	30	61	39	50	36	26	54	46	56	57	40.3306	36.8053	29.6804	25.7198	23.8335	31.2739	33.6502	24.777	35.1118	41.8004	26.1643	43.3387	32.3007	1.03283	0.823205	0
srna4964692	TCAACGGGTATTTATTGAGCA	21	1	chr4	8007039	8007059	-	EXACT	refGene	NM_001130085	ABLIM2	7967036	8160559	-	Homo sapiens actin binding LIM protein family, member 2 (ABLIM2), transcript variant 3, mRNA.	40	30	61	39	50	36	26	54	46	56	57	40.3306	36.8053	29.6804	25.7198	23.8335	31.2739	33.6502	24.777	35.1118	41.8004	26.1643	43.3387	32.3007	1.03283	0.823205	0
srna4964692	TCAACGGGTATTTATTGAGCA	21	1	chr4	8007039	8007059	-	EXACT	refGene	NM_001130086	ABLIM2	7967036	8160559	-	Homo sapiens actin binding LIM protein family, member 2 (ABLIM2), transcript variant 4, mRNA.	40	30	61	39	50	36	26	54	46	56	57	40.3306	36.8053	29.6804	25.7198	23.8335	31.2739	33.6502	24.777	35.1118	41.8004	26.1643	43.3387	32.3007	1.03283	0.823205	0
srna4964692	TCAACGGGTATTTATTGAGCA	21	1	chr4	8007039	8007059	-	EXACT	refGene	NM_001130087	ABLIM2	7967036	8160559	-	Homo sapiens actin binding LIM protein family, member 2 (ABLIM2), transcript variant 5, mRNA.	40	30	61	39	50	36	26	54	46	56	57	40.3306	36.8053	29.6804	25.7198	23.8335	31.2739	33.6502	24.777	35.1118	41.8004	26.1643	43.3387	32.3007	1.03283	0.823205	0
srna4964692	TCAACGGGTATTTATTGAGCA	21	1	chr4	8007039	8007059	-	EXACT	refGene	NM_032432	ABLIM2	7967036	8160559	-	Homo sapiens actin binding LIM protein family, member 2 (ABLIM2), transcript variant 6, mRNA.	40	30	61	39	50	36	26	54	46	56	57	40.3306	36.8053	29.6804	25.7198	23.8335	31.2739	33.6502	24.777	35.1118	41.8004	26.1643	43.3387	32.3007	1.03283	0.823205	0
srna1790604	CAACGGGTATTTATTGAGC	19	1	chr4	8007040	8007058	-	EXACT	refGene	NM_001130083	ABLIM2	7967036	8160559	-	Homo sapiens actin binding LIM protein family, member 2 (ABLIM2), transcript variant 1, mRNA.	14	9	34	13	17	12	11	21	19	25	22	22.4793	12.5138	9.89346	8.57327	10.0834	12.7087	12.9878	7.4331	14.5027	18.6609	9.15751	16.8539	12.5484	0.98739	0.961508	0
srna1790604	CAACGGGTATTTATTGAGC	19	1	chr4	8007040	8007058	-	EXACT	refGene	NM_001130084	ABLIM2	7967036	8160559	-	Homo sapiens actin binding LIM protein family, member 2 (ABLIM2), transcript variant 2, mRNA.	14	9	34	13	17	12	11	21	19	25	22	22.4793	12.5138	9.89346	8.57327	10.0834	12.7087	12.9878	7.4331	14.5027	18.6609	9.15751	16.8539	12.5484	0.98739	0.961508	0
srna1790604	CAACGGGTATTTATTGAGC	19	1	chr4	8007040	8007058	-	EXACT	refGene	NM_001130085	ABLIM2	7967036	8160559	-	Homo sapiens actin binding LIM protein family, member 2 (ABLIM2), transcript variant 3, mRNA.	14	9	34	13	17	12	11	21	19	25	22	22.4793	12.5138	9.89346	8.57327	10.0834	12.7087	12.9878	7.4331	14.5027	18.6609	9.15751	16.8539	12.5484	0.98739	0.961508	0
srna1790604	CAACGGGTATTTATTGAGC	19	1	chr4	8007040	8007058	-	EXACT	refGene	NM_001130086	ABLIM2	7967036	8160559	-	Homo sapiens actin binding LIM protein family, member 2 (ABLIM2), transcript variant 4, mRNA.	14	9	34	13	17	12	11	21	19	25	22	22.4793	12.5138	9.89346	8.57327	10.0834	12.7087	12.9878	7.4331	14.5027	18.6609	9.15751	16.8539	12.5484	0.98739	0.961508	0
srna1790604	CAACGGGTATTTATTGAGC	19	1	chr4	8007040	8007058	-	EXACT	refGene	NM_001130087	ABLIM2	7967036	8160559	-	Homo sapiens actin binding LIM protein family, member 2 (ABLIM2), transcript variant 5, mRNA.	14	9	34	13	17	12	11	21	19	25	22	22.4793	12.5138	9.89346	8.57327	10.0834	12.7087	12.9878	7.4331	14.5027	18.6609	9.15751	16.8539	12.5484	0.98739	0.961508	0
srna1790604	CAACGGGTATTTATTGAGC	19	1	chr4	8007040	8007058	-	EXACT	refGene	NM_032432	ABLIM2	7967036	8160559	-	Homo sapiens actin binding LIM protein family, member 2 (ABLIM2), transcript variant 6, mRNA.	14	9	34	13	17	12	11	21	19	25	22	22.4793	12.5138	9.89346	8.57327	10.0834	12.7087	12.9878	7.4331	14.5027	18.6609	9.15751	16.8539	12.5484	0.98739	0.961508	0
srna259079	AACGGGTATTTATTGAGC	18	1	chr4	8007040	8007057	-	EXACT	refGene	NM_001130083	ABLIM2	7967036	8160559	-	Homo sapiens actin binding LIM protein family, member 2 (ABLIM2), transcript variant 1, mRNA.	15	10	21	14	17	2	7	17	14	9	17	13.8843	12.5138	10.6545	1.42888	6.41672	8.97964	10.036	8.259	10.6862	6.71792	9.81162	13.6437	9.10215	1.01364	0.96101	0
srna259079	AACGGGTATTTATTGAGC	18	1	chr4	8007040	8007057	-	EXACT	refGene	NM_001130084	ABLIM2	7967036	8160559	-	Homo sapiens actin binding LIM protein family, member 2 (ABLIM2), transcript variant 2, mRNA.	15	10	21	14	17	2	7	17	14	9	17	13.8843	12.5138	10.6545	1.42888	6.41672	8.97964	10.036	8.259	10.6862	6.71792	9.81162	13.6437	9.10215	1.01364	0.96101	0
srna259079	AACGGGTATTTATTGAGC	18	1	chr4	8007040	8007057	-	EXACT	refGene	NM_001130085	ABLIM2	7967036	8160559	-	Homo sapiens actin binding LIM protein family, member 2 (ABLIM2), transcript variant 3, mRNA.	15	10	21	14	17	2	7	17	14	9	17	13.8843	12.5138	10.6545	1.42888	6.41672	8.97964	10.036	8.259	10.6862	6.71792	9.81162	13.6437	9.10215	1.01364	0.96101	0
srna259079	AACGGGTATTTATTGAGC	18	1	chr4	8007040	8007057	-	EXACT	refGene	NM_001130086	ABLIM2	7967036	8160559	-	Homo sapiens actin binding LIM protein family, member 2 (ABLIM2), transcript variant 4, mRNA.	15	10	21	14	17	2	7	17	14	9	17	13.8843	12.5138	10.6545	1.42888	6.41672	8.97964	10.036	8.259	10.6862	6.71792	9.81162	13.6437	9.10215	1.01364	0.96101	0
srna259079	AACGGGTATTTATTGAGC	18	1	chr4	8007040	8007057	-	EXACT	refGene	NM_001130087	ABLIM2	7967036	8160559	-	Homo sapiens actin binding LIM protein family, member 2 (ABLIM2), transcript variant 5, mRNA.	15	10	21	14	17	2	7	17	14	9	17	13.8843	12.5138	10.6545	1.42888	6.41672	8.97964	10.036	8.259	10.6862	6.71792	9.81162	13.6437	9.10215	1.01364	0.96101	0
srna259079	AACGGGTATTTATTGAGC	18	1	chr4	8007040	8007057	-	EXACT	refGene	NM_032432	ABLIM2	7967036	8160559	-	Homo sapiens actin binding LIM protein family, member 2 (ABLIM2), transcript variant 6, mRNA.	15	10	21	14	17	2	7	17	14	9	17	13.8843	12.5138	10.6545	1.42888	6.41672	8.97964	10.036	8.259	10.6862	6.71792	9.81162	13.6437	9.10215	1.01364	0.96101	0
srna4964687	TCAACGGGTATTTATTGAG	19	1	chr4	8007041	8007059	-	EXACT	refGene	NM_001130083	ABLIM2	7967036	8160559	-	Homo sapiens actin binding LIM protein family, member 2 (ABLIM2), transcript variant 1, mRNA.	11	12	19	9	11	8	7	9	11	10	14	12.562	8.09717	6.84932	5.71551	6.41672	7.92814	8.26495	9.9108	8.39631	7.46436	7.19519	7.22311	8.24632	1.04013	0.817501	0
srna4964687	TCAACGGGTATTTATTGAG	19	1	chr4	8007041	8007059	-	EXACT	refGene	NM_001130084	ABLIM2	7967036	8160559	-	Homo sapiens actin binding LIM protein family, member 2 (ABLIM2), transcript variant 2, mRNA.	11	12	19	9	11	8	7	9	11	10	14	12.562	8.09717	6.84932	5.71551	6.41672	7.92814	8.26495	9.9108	8.39631	7.46436	7.19519	7.22311	8.24632	1.04013	0.817501	0
srna4964687	TCAACGGGTATTTATTGAG	19	1	chr4	8007041	8007059	-	EXACT	refGene	NM_001130085	ABLIM2	7967036	8160559	-	Homo sapiens actin binding LIM protein family, member 2 (ABLIM2), transcript variant 3, mRNA.	11	12	19	9	11	8	7	9	11	10	14	12.562	8.09717	6.84932	5.71551	6.41672	7.92814	8.26495	9.9108	8.39631	7.46436	7.19519	7.22311	8.24632	1.04013	0.817501	0
srna4964687	TCAACGGGTATTTATTGAG	19	1	chr4	8007041	8007059	-	EXACT	refGene	NM_001130086	ABLIM2	7967036	8160559	-	Homo sapiens actin binding LIM protein family, member 2 (ABLIM2), transcript variant 4, mRNA.	11	12	19	9	11	8	7	9	11	10	14	12.562	8.09717	6.84932	5.71551	6.41672	7.92814	8.26495	9.9108	8.39631	7.46436	7.19519	7.22311	8.24632	1.04013	0.817501	0
srna4964687	TCAACGGGTATTTATTGAG	19	1	chr4	8007041	8007059	-	EXACT	refGene	NM_001130087	ABLIM2	7967036	8160559	-	Homo sapiens actin binding LIM protein family, member 2 (ABLIM2), transcript variant 5, mRNA.	11	12	19	9	11	8	7	9	11	10	14	12.562	8.09717	6.84932	5.71551	6.41672	7.92814	8.26495	9.9108	8.39631	7.46436	7.19519	7.22311	8.24632	1.04013	0.817501	0
srna4964687	TCAACGGGTATTTATTGAG	19	1	chr4	8007041	8007059	-	EXACT	refGene	NM_032432	ABLIM2	7967036	8160559	-	Homo sapiens actin binding LIM protein family, member 2 (ABLIM2), transcript variant 6, mRNA.	11	12	19	9	11	8	7	9	11	10	14	12.562	8.09717	6.84932	5.71551	6.41672	7.92814	8.26495	9.9108	8.39631	7.46436	7.19519	7.22311	8.24632	1.04013	0.817501	0
srna1790605	CAACGGGTATTTATTGAGCA	20	1	chr4	8007039	8007058	-	EXACT	refGene	NM_001130083	ABLIM2	7967036	8160559	-	Homo sapiens actin binding LIM protein family, member 2 (ABLIM2), transcript variant 1, mRNA.	12	8	18	11	9	11	5	14	14	17	17	11.9008	6.62495	8.37139	7.85883	4.58337	7.86787	10.036	6.6072	10.6862	12.6894	7.84929	11.236	9.57362	1.2168	0.320457	0
srna1790605	CAACGGGTATTTATTGAGCA	20	1	chr4	8007039	8007058	-	EXACT	refGene	NM_001130084	ABLIM2	7967036	8160559	-	Homo sapiens actin binding LIM protein family, member 2 (ABLIM2), transcript variant 2, mRNA.	12	8	18	11	9	11	5	14	14	17	17	11.9008	6.62495	8.37139	7.85883	4.58337	7.86787	10.036	6.6072	10.6862	12.6894	7.84929	11.236	9.57362	1.2168	0.320457	0
srna1790605	CAACGGGTATTTATTGAGCA	20	1	chr4	8007039	8007058	-	EXACT	refGene	NM_001130085	ABLIM2	7967036	8160559	-	Homo sapiens actin binding LIM protein family, member 2 (ABLIM2), transcript variant 3, mRNA.	12	8	18	11	9	11	5	14	14	17	17	11.9008	6.62495	8.37139	7.85883	4.58337	7.86787	10.036	6.6072	10.6862	12.6894	7.84929	11.236	9.57362	1.2168	0.320457	0
srna1790605	CAACGGGTATTTATTGAGCA	20	1	chr4	8007039	8007058	-	EXACT	refGene	NM_001130086	ABLIM2	7967036	8160559	-	Homo sapiens actin binding LIM protein family, member 2 (ABLIM2), transcript variant 4, mRNA.	12	8	18	11	9	11	5	14	14	17	17	11.9008	6.62495	8.37139	7.85883	4.58337	7.86787	10.036	6.6072	10.6862	12.6894	7.84929	11.236	9.57362	1.2168	0.320457	0
srna1790605	CAACGGGTATTTATTGAGCA	20	1	chr4	8007039	8007058	-	EXACT	refGene	NM_001130087	ABLIM2	7967036	8160559	-	Homo sapiens actin binding LIM protein family, member 2 (ABLIM2), transcript variant 5, mRNA.	12	8	18	11	9	11	5	14	14	17	17	11.9008	6.62495	8.37139	7.85883	4.58337	7.86787	10.036	6.6072	10.6862	12.6894	7.84929	11.236	9.57362	1.2168	0.320457	0
srna1790605	CAACGGGTATTTATTGAGCA	20	1	chr4	8007039	8007058	-	EXACT	refGene	NM_032432	ABLIM2	7967036	8160559	-	Homo sapiens actin binding LIM protein family, member 2 (ABLIM2), transcript variant 6, mRNA.	12	8	18	11	9	11	5	14	14	17	17	11.9008	6.62495	8.37139	7.85883	4.58337	7.86787	10.036	6.6072	10.6862	12.6894	7.84929	11.236	9.57362	1.2168	0.320457	0
srna5884463	TTCAACGGGTATTTATTGA	19	1	chr4	8007042	8007060	-	EXACT	refGene	NM_001130083	ABLIM2	7967036	8160559	-	Homo sapiens actin binding LIM protein family, member 2 (ABLIM2), transcript variant 1, mRNA.	14	5	17	10	7	4	8	12	12	16	10	11.2397	5.15274	7.61035	2.85776	7.33339	6.83878	5.90354	4.1295	9.15961	11.943	9.15751	9.63082	8.05862	1.17837	0.550157	0
srna5884463	TTCAACGGGTATTTATTGA	19	1	chr4	8007042	8007060	-	EXACT	refGene	NM_001130084	ABLIM2	7967036	8160559	-	Homo sapiens actin binding LIM protein family, member 2 (ABLIM2), transcript variant 2, mRNA.	14	5	17	10	7	4	8	12	12	16	10	11.2397	5.15274	7.61035	2.85776	7.33339	6.83878	5.90354	4.1295	9.15961	11.943	9.15751	9.63082	8.05862	1.17837	0.550157	0
srna5884463	TTCAACGGGTATTTATTGA	19	1	chr4	8007042	8007060	-	EXACT	refGene	NM_001130085	ABLIM2	7967036	8160559	-	Homo sapiens actin binding LIM protein family, member 2 (ABLIM2), transcript variant 3, mRNA.	14	5	17	10	7	4	8	12	12	16	10	11.2397	5.15274	7.61035	2.85776	7.33339	6.83878	5.90354	4.1295	9.15961	11.943	9.15751	9.63082	8.05862	1.17837	0.550157	0
srna5884463	TTCAACGGGTATTTATTGA	19	1	chr4	8007042	8007060	-	EXACT	refGene	NM_001130086	ABLIM2	7967036	8160559	-	Homo sapiens actin binding LIM protein family, member 2 (ABLIM2), transcript variant 4, mRNA.	14	5	17	10	7	4	8	12	12	16	10	11.2397	5.15274	7.61035	2.85776	7.33339	6.83878	5.90354	4.1295	9.15961	11.943	9.15751	9.63082	8.05862	1.17837	0.550157	0
srna5884463	TTCAACGGGTATTTATTGA	19	1	chr4	8007042	8007060	-	EXACT	refGene	NM_001130087	ABLIM2	7967036	8160559	-	Homo sapiens actin binding LIM protein family, member 2 (ABLIM2), transcript variant 5, mRNA.	14	5	17	10	7	4	8	12	12	16	10	11.2397	5.15274	7.61035	2.85776	7.33339	6.83878	5.90354	4.1295	9.15961	11.943	9.15751	9.63082	8.05862	1.17837	0.550157	0
srna5884463	TTCAACGGGTATTTATTGA	19	1	chr4	8007042	8007060	-	EXACT	refGene	NM_032432	ABLIM2	7967036	8160559	-	Homo sapiens actin binding LIM protein family, member 2 (ABLIM2), transcript variant 6, mRNA.	14	5	17	10	7	4	8	12	12	16	10	11.2397	5.15274	7.61035	2.85776	7.33339	6.83878	5.90354	4.1295	9.15961	11.943	9.15751	9.63082	8.05862	1.17837	0.550157	0
srna1666654	ATTCAACGGGTATTTATTGAGC	22	1	chr4	8007040	8007061	-	EXACT	refGene	NM_001130083	ABLIM2	7967036	8160559	-	Homo sapiens actin binding LIM protein family, member 2 (ABLIM2), transcript variant 1, mRNA.	3	4	12	7	8	7	4	10	6	9	10	7.93388	5.88885	5.32725	5.00107	3.6667	5.56355	5.90354	3.3036	4.5798	6.71792	1.96232	8.02568	4.49344	0.807657	0.362747	0
srna1666654	ATTCAACGGGTATTTATTGAGC	22	1	chr4	8007040	8007061	-	EXACT	refGene	NM_001130084	ABLIM2	7967036	8160559	-	Homo sapiens actin binding LIM protein family, member 2 (ABLIM2), transcript variant 2, mRNA.	3	4	12	7	8	7	4	10	6	9	10	7.93388	5.88885	5.32725	5.00107	3.6667	5.56355	5.90354	3.3036	4.5798	6.71792	1.96232	8.02568	4.49344	0.807657	0.362747	0
srna1666654	ATTCAACGGGTATTTATTGAGC	22	1	chr4	8007040	8007061	-	EXACT	refGene	NM_001130085	ABLIM2	7967036	8160559	-	Homo sapiens actin binding LIM protein family, member 2 (ABLIM2), transcript variant 3, mRNA.	3	4	12	7	8	7	4	10	6	9	10	7.93388	5.88885	5.32725	5.00107	3.6667	5.56355	5.90354	3.3036	4.5798	6.71792	1.96232	8.02568	4.49344	0.807657	0.362747	0
srna1666654	ATTCAACGGGTATTTATTGAGC	22	1	chr4	8007040	8007061	-	EXACT	refGene	NM_001130086	ABLIM2	7967036	8160559	-	Homo sapiens actin binding LIM protein family, member 2 (ABLIM2), transcript variant 4, mRNA.	3	4	12	7	8	7	4	10	6	9	10	7.93388	5.88885	5.32725	5.00107	3.6667	5.56355	5.90354	3.3036	4.5798	6.71792	1.96232	8.02568	4.49344	0.807657	0.362747	0
srna1666654	ATTCAACGGGTATTTATTGAGC	22	1	chr4	8007040	8007061	-	EXACT	refGene	NM_001130087	ABLIM2	7967036	8160559	-	Homo sapiens actin binding LIM protein family, member 2 (ABLIM2), transcript variant 5, mRNA.	3	4	12	7	8	7	4	10	6	9	10	7.93388	5.88885	5.32725	5.00107	3.6667	5.56355	5.90354	3.3036	4.5798	6.71792	1.96232	8.02568	4.49344	0.807657	0.362747	0
srna1666654	ATTCAACGGGTATTTATTGAGC	22	1	chr4	8007040	8007061	-	EXACT	refGene	NM_032432	ABLIM2	7967036	8160559	-	Homo sapiens actin binding LIM protein family, member 2 (ABLIM2), transcript variant 6, mRNA.	3	4	12	7	8	7	4	10	6	9	10	7.93388	5.88885	5.32725	5.00107	3.6667	5.56355	5.90354	3.3036	4.5798	6.71792	1.96232	8.02568	4.49344	0.807657	0.362747	0
srna259080	AACGGGTATTTATTGAGCA	19	1	chr4	8007039	8007057	-	EXACT	refGene	NM_001130083	ABLIM2	7967036	8160559	-	Homo sapiens actin binding LIM protein family, member 2 (ABLIM2), transcript variant 1, mRNA.	11	7	10	5	4	9	2	5	5	8	5	6.61157	2.94442	3.80518	6.42995	1.83335	4.32489	2.95177	5.7813	3.8165	5.97149	7.19519	4.01284	5.14325	1.18922	0.522997	0
srna259080	AACGGGTATTTATTGAGCA	19	1	chr4	8007039	8007057	-	EXACT	refGene	NM_001130084	ABLIM2	7967036	8160559	-	Homo sapiens actin binding LIM protein family, member 2 (ABLIM2), transcript variant 2, mRNA.	11	7	10	5	4	9	2	5	5	8	5	6.61157	2.94442	3.80518	6.42995	1.83335	4.32489	2.95177	5.7813	3.8165	5.97149	7.19519	4.01284	5.14325	1.18922	0.522997	0
srna259080	AACGGGTATTTATTGAGCA	19	1	chr4	8007039	8007057	-	EXACT	refGene	NM_001130085	ABLIM2	7967036	8160559	-	Homo sapiens actin binding LIM protein family, member 2 (ABLIM2), transcript variant 3, mRNA.	11	7	10	5	4	9	2	5	5	8	5	6.61157	2.94442	3.80518	6.42995	1.83335	4.32489	2.95177	5.7813	3.8165	5.97149	7.19519	4.01284	5.14325	1.18922	0.522997	0
srna259080	AACGGGTATTTATTGAGCA	19	1	chr4	8007039	8007057	-	EXACT	refGene	NM_001130086	ABLIM2	7967036	8160559	-	Homo sapiens actin binding LIM protein family, member 2 (ABLIM2), transcript variant 4, mRNA.	11	7	10	5	4	9	2	5	5	8	5	6.61157	2.94442	3.80518	6.42995	1.83335	4.32489	2.95177	5.7813	3.8165	5.97149	7.19519	4.01284	5.14325	1.18922	0.522997	0
srna259080	AACGGGTATTTATTGAGCA	19	1	chr4	8007039	8007057	-	EXACT	refGene	NM_001130087	ABLIM2	7967036	8160559	-	Homo sapiens actin binding LIM protein family, member 2 (ABLIM2), transcript variant 5, mRNA.	11	7	10	5	4	9	2	5	5	8	5	6.61157	2.94442	3.80518	6.42995	1.83335	4.32489	2.95177	5.7813	3.8165	5.97149	7.19519	4.01284	5.14325	1.18922	0.522997	0
srna259080	AACGGGTATTTATTGAGCA	19	1	chr4	8007039	8007057	-	EXACT	refGene	NM_032432	ABLIM2	7967036	8160559	-	Homo sapiens actin binding LIM protein family, member 2 (ABLIM2), transcript variant 6, mRNA.	11	7	10	5	4	9	2	5	5	8	5	6.61157	2.94442	3.80518	6.42995	1.83335	4.32489	2.95177	5.7813	3.8165	5.97149	7.19519	4.01284	5.14325	1.18922	0.522997	0
srna2642420	CGCATCCCCTAGGGCATTGGTGT	23	1	chr17	7126661	7126683	-	EXACT	refGene	NM_000018	ACADVL	7123149	7128586	+	Homo sapiens acyl-CoA dehydrogenase, very long chain (ACADVL), nuclear gene encoding mitochondrial protein, transcript variant 1, mRNA.	165	115	299	227	356	142	219	186	186	137	138	197.686	262.054	172.755	101.45	200.752	186.939	81.4688	94.9785	141.974	102.262	107.928	149.278	105.722	0.565543	0.0317043	1
srna2642420	CGCATCCCCTAGGGCATTGGTGT	23	1	chr17	7126661	7126683	-	EXACT	refGene	NM_001033859	ACADVL	7123149	7128586	+	Homo sapiens acyl-CoA dehydrogenase, very long chain (ACADVL), nuclear gene encoding mitochondrial protein, transcript variant 2, mRNA.	165	115	299	227	356	142	219	186	186	137	138	197.686	262.054	172.755	101.45	200.752	186.939	81.4688	94.9785	141.974	102.262	107.928	149.278	105.722	0.565543	0.0317043	1
srna2642403	CGCATCCCCTAGGGCATTGGTG	22	1	chr17	7126662	7126683	-	EXACT	refGene	NM_000018	ACADVL	7123149	7128586	+	Homo sapiens acyl-CoA dehydrogenase, very long chain (ACADVL), nuclear gene encoding mitochondrial protein, transcript variant 1, mRNA.	55	41	83	62	134	72	62	63	42	44	39	54.876	98.6382	47.1842	51.4396	56.8338	61.7944	23.0238	33.8619	32.0586	32.8432	35.9759	50.5618	31.5527	0.510608	0.0299361	0
srna2642403	CGCATCCCCTAGGGCATTGGTG	22	1	chr17	7126662	7126683	-	EXACT	refGene	NM_001033859	ACADVL	7123149	7128586	+	Homo sapiens acyl-CoA dehydrogenase, very long chain (ACADVL), nuclear gene encoding mitochondrial protein, transcript variant 2, mRNA.	55	41	83	62	134	72	62	63	42	44	39	54.876	98.6382	47.1842	51.4396	56.8338	61.7944	23.0238	33.8619	32.0586	32.8432	35.9759	50.5618	31.5527	0.510608	0.0299361	0
srna2642392	CGCATCCCCTAGGGCATTGGT	21	1	chr17	7126663	7126683	-	EXACT	refGene	NM_000018	ACADVL	7123149	7128586	+	Homo sapiens acyl-CoA dehydrogenase, very long chain (ACADVL), nuclear gene encoding mitochondrial protein, transcript variant 1, mRNA.	27	25	48	53	72	48	50	44	37	37	35	31.7355	52.9996	40.3349	34.2931	45.8337	41.0394	20.6624	20.6475	28.2421	27.6181	17.6609	35.313	22.9662	0.559614	0.00591608	0
srna2642392	CGCATCCCCTAGGGCATTGGT	21	1	chr17	7126663	7126683	-	EXACT	refGene	NM_001033859	ACADVL	7123149	7128586	+	Homo sapiens acyl-CoA dehydrogenase, very long chain (ACADVL), nuclear gene encoding mitochondrial protein, transcript variant 2, mRNA.	27	25	48	53	72	48	50	44	37	37	35	31.7355	52.9996	40.3349	34.2931	45.8337	41.0394	20.6624	20.6475	28.2421	27.6181	17.6609	35.313	22.9662	0.559614	0.00591608	0
srna2212562	CCACTGCCCCAGGTGCTGCTGG	22	1	chr17	7126627	7126648	-	EXACT	refGene	NM_000018	ACADVL	7123149	7128586	+	Homo sapiens acyl-CoA dehydrogenase, very long chain (ACADVL), nuclear gene encoding mitochondrial protein, transcript variant 1, mRNA.	17	8	15	19	21	18	18	16	14	9	12	9.91736	15.4582	14.4597	12.8599	16.5001	13.8391	7.08424	6.6072	10.6862	6.71792	11.1198	12.8411	8.44308	0.610091	0.0079758	0
srna2212562	CCACTGCCCCAGGTGCTGCTGG	22	1	chr17	7126627	7126648	-	EXACT	refGene	NM_001033859	ACADVL	7123149	7128586	+	Homo sapiens acyl-CoA dehydrogenase, very long chain (ACADVL), nuclear gene encoding mitochondrial protein, transcript variant 2, mRNA.	17	8	15	19	21	18	18	16	14	9	12	9.91736	15.4582	14.4597	12.8599	16.5001	13.8391	7.08424	6.6072	10.6862	6.71792	11.1198	12.8411	8.44308	0.610091	0.0079758	0
srna858356	ACTGCCCCAGGTGCTGCTGG	20	1	chr17	7126627	7126646	-	EXACT	refGene	NM_000018	ACADVL	7123149	7128586	+	Homo sapiens acyl-CoA dehydrogenase, very long chain (ACADVL), nuclear gene encoding mitochondrial protein, transcript variant 1, mRNA.	8	5	15	7	19	14	12	11	6	5	4	9.91736	13.986	5.32725	10.0021	11.0001	10.0466	2.36141	4.1295	4.5798	3.73218	5.23286	8.82825	4.00715	0.398858	0.00956183	0
srna858356	ACTGCCCCAGGTGCTGCTGG	20	1	chr17	7126627	7126646	-	EXACT	refGene	NM_001033859	ACADVL	7123149	7128586	+	Homo sapiens acyl-CoA dehydrogenase, very long chain (ACADVL), nuclear gene encoding mitochondrial protein, transcript variant 2, mRNA.	8	5	15	7	19	14	12	11	6	5	4	9.91736	13.986	5.32725	10.0021	11.0001	10.0466	2.36141	4.1295	4.5798	3.73218	5.23286	8.82825	4.00715	0.398858	0.00956183	0
srna2212555	CCACTGCCCCAGGTGCTGCTG	21	1	chr17	7126628	7126648	-	EXACT	refGene	NM_000018	ACADVL	7123149	7128586	+	Homo sapiens acyl-CoA dehydrogenase, very long chain (ACADVL), nuclear gene encoding mitochondrial protein, transcript variant 1, mRNA.	4	8	13	9	23	11	8	14	5	2	8	8.59504	16.9304	6.84932	7.85883	7.33339	9.5134	4.72283	6.6072	3.8165	1.49287	2.61643	11.236	3.85117	0.404815	0.0360836	0
srna2212555	CCACTGCCCCAGGTGCTGCTG	21	1	chr17	7126628	7126648	-	EXACT	refGene	NM_001033859	ACADVL	7123149	7128586	+	Homo sapiens acyl-CoA dehydrogenase, very long chain (ACADVL), nuclear gene encoding mitochondrial protein, transcript variant 2, mRNA.	4	8	13	9	23	11	8	14	5	2	8	8.59504	16.9304	6.84932	7.85883	7.33339	9.5134	4.72283	6.6072	3.8165	1.49287	2.61643	11.236	3.85117	0.404815	0.0360836	0
srna2642376	CGCATCCCCTAGGGCATTGG	20	1	chr17	7126664	7126683	-	EXACT	refGene	NM_000018	ACADVL	7123149	7128586	+	Homo sapiens acyl-CoA dehydrogenase, very long chain (ACADVL), nuclear gene encoding mitochondrial protein, transcript variant 1, mRNA.	9	2	7	9	9	3	11	10	5	3	5	4.6281	6.62495	6.84932	2.14332	10.0834	6.06582	2.95177	1.6518	3.8165	2.23931	5.88697	8.02568	3.30927	0.54556	0.114845	0
srna2642376	CGCATCCCCTAGGGCATTGG	20	1	chr17	7126664	7126683	-	EXACT	refGene	NM_001033859	ACADVL	7123149	7128586	+	Homo sapiens acyl-CoA dehydrogenase, very long chain (ACADVL), nuclear gene encoding mitochondrial protein, transcript variant 2, mRNA.	9	2	7	9	9	3	11	10	5	3	5	4.6281	6.62495	6.84932	2.14332	10.0834	6.06582	2.95177	1.6518	3.8165	2.23931	5.88697	8.02568	3.30927	0.54556	0.114845	0
srna3699837	GCATCCCCTAGGGCATTGGTGT	22	1	chr17	7126661	7126682	-	EXACT	refGene	NM_000018	ACADVL	7123149	7128586	+	Homo sapiens acyl-CoA dehydrogenase, very long chain (ACADVL), nuclear gene encoding mitochondrial protein, transcript variant 1, mRNA.	5	3	12	6	8	2	3	4	9	3	4	7.93388	5.88885	4.56621	1.42888	2.75002	4.51357	2.36141	2.4777	6.8697	2.23931	3.27054	3.21027	3.44373	0.762974	0.480532	0
srna3699837	GCATCCCCTAGGGCATTGGTGT	22	1	chr17	7126661	7126682	-	EXACT	refGene	NM_001033859	ACADVL	7123149	7128586	+	Homo sapiens acyl-CoA dehydrogenase, very long chain (ACADVL), nuclear gene encoding mitochondrial protein, transcript variant 2, mRNA.	5	3	12	6	8	2	3	4	9	3	4	7.93388	5.88885	4.56621	1.42888	2.75002	4.51357	2.36141	2.4777	6.8697	2.23931	3.27054	3.21027	3.44373	0.762974	0.480532	0
srna3536149	GAGGGGGCGGGCTCCGGCGGG	21	1	chr11	130297699	130297719	+	EXACT	refGene	NM_007037	ADAMTS8	130274817	130298539	-	Homo sapiens ADAM metallopeptidase with thrombospondin type 1 motif, 8 (ADAMTS8), mRNA.	2	51	46	15	14	15	57	34	24	15	4	30.4132	10.3055	11.4155	10.7166	52.2504	23.0202	2.36141	42.1209	18.3192	11.1965	1.30822	27.2873	15.0613	0.654261	0.494026	0
srna3536142	GAGGGGGCGGGCTCCGGCG	19	1	chr11	130297699	130297717	+	EXACT	refGene	NM_007037	ADAMTS8	130274817	130298539	-	Homo sapiens ADAM metallopeptidase with thrombospondin type 1 motif, 8 (ADAMTS8), mRNA.	1	21	19	6	7	7	35	13	18	2	5	12.562	5.15274	4.56621	5.00107	32.0836	11.8731	2.95177	17.3439	13.7394	1.49287	0.654108	10.4334	7.23641	0.609478	0.485983	0
srna4052227	GGAGGGGGCGGGCTCCGGCGGG	22	1	chr11	130297698	130297719	+	EXACT	refGene	NM_007037	ADAMTS8	130274817	130298539	-	Homo sapiens ADAM metallopeptidase with thrombospondin type 1 motif, 8 (ADAMTS8), mRNA.	4	19	11	7	7	9	26	11	11	7	5	7.27273	5.15274	5.32725	6.42995	23.8335	9.60324	2.95177	15.6921	8.39631	5.22505	2.61643	8.82825	6.97633	0.726456	0.561846	0
srna3536140	GAGGGGGCGGGCTCCGGC	18	1	chr11	130297699	130297716	+	EXACT	refGene	NM_007037	ADAMTS8	130274817	130298539	-	Homo sapiens ADAM metallopeptidase with thrombospondin type 1 motif, 8 (ADAMTS8), mRNA.	1	14	22	5	4	3	17	10	6	3		14.5455	2.94442	3.80518	2.14332	15.5835	7.80437	0	11.5626	4.5798	2.23931	0.654108	8.02568	3.80716	0.487825	0.30785	0
srna3536137	GAGGGGGCGGGCTCCGG	17	1	chr11	130297699	130297715	+	EXACT	refGene	NM_007037	ADAMTS8	130274817	130298539	-	Homo sapiens ADAM metallopeptidase with thrombospondin type 1 motif, 8 (ADAMTS8), mRNA.	1	9	13	5	6	3	13	12	8		1	8.59504	4.41664	3.80518	2.14332	11.9168	6.17539	0.590354	7.4331	6.1064	0	0.654108	9.63082	2.95679	0.478803	0.213989	0
srna4052223	GGAGGGGGCGGGCTCCGGCG	20	1	chr11	130297698	130297717	+	EXACT	refGene	NM_007037	ADAMTS8	130274817	130298539	-	Homo sapiens ADAM metallopeptidase with thrombospondin type 1 motif, 8 (ADAMTS8), mRNA.	1	13	14	7	4	1	9	8	8	1	2	9.2562	2.94442	5.32725	0.714439	8.25007	5.29847	1.18071	10.7367	6.1064	0.746436	0.654108	6.42055	3.88487	0.733206	0.595702	0
srna4052220	GGAGGGGGCGGGCTCCGGC	19	1	chr11	130297698	130297716	+	EXACT	refGene	NM_007037	ADAMTS8	130274817	130298539	-	Homo sapiens ADAM metallopeptidase with thrombospondin type 1 motif, 8 (ADAMTS8), mRNA.		9	9	3	4	6	12	3	2	2	1	5.95041	2.94442	2.28311	4.28663	11.0001	5.29293	0.590354	7.4331	1.5266	1.49287	0	2.4077	2.20859	0.417271	0.17241	0
srna3536145	GAGGGGGCGGGCTCCGGCGG	20	1	chr11	130297699	130297718	+	EXACT	refGene	NM_007037	ADAMTS8	130274817	130298539	-	Homo sapiens ADAM metallopeptidase with thrombospondin type 1 motif, 8 (ADAMTS8), mRNA.	3	16	11	5	1	4	6	12	4	3		7.27273	0.736106	3.80518	2.85776	5.50005	4.03436	0	13.2144	3.0532	2.23931	1.96232	9.63082	4.09385	1.01474	0.982441	0
srna4052225	GGAGGGGGCGGGCTCCGGCGG	21	1	chr11	130297698	130297718	+	EXACT	refGene	NM_007037	ADAMTS8	130274817	130298539	-	Homo sapiens ADAM metallopeptidase with thrombospondin type 1 motif, 8 (ADAMTS8), mRNA.	1	6	5	1	3	3	10	3	7	2		3.30579	2.20832	0.761035	2.14332	9.16674	3.51704	0	4.9554	5.3431	1.49287	0.654108	2.4077	2.4891	0.707725	0.593385	0
srna4052219	GGAGGGGGCGGGCTCCGG	18	1	chr11	130297698	130297715	+	EXACT	refGene	NM_007037	ADAMTS8	130274817	130298539	-	Homo sapiens ADAM metallopeptidase with thrombospondin type 1 motif, 8 (ADAMTS8), mRNA.		5	4	2		3	10	6	2	1	2	2.64463	0	1.52207	2.14332	9.16674	3.09535	1.18071	4.1295	1.5266	0.746436	0	4.81541	1.51665	0.489976	0.399633	0
srna4627830	TAAAGCAATACACTGAA	17	1	chr21	46613684	46613700	+	EXACT	refGene	NM_001112	ADARB1	46494492	46646478	+	Homo sapiens adenosine deaminase, RNA-specific, B1 (ADARB1), transcript variant 1, mRNA.	6	3	3	8		2	5	5	12	1		1.98347	0	6.08828	1.42888	4.58337	2.8168	0	2.4777	9.15961	0.746436	3.92465	4.01284	3.26168	1.15794	0.827273	0
srna4627830	TAAAGCAATACACTGAA	17	1	chr21	46613684	46613700	+	EXACT	refGene	NM_001160230	ADARB1	46494492	46646478	+	Homo sapiens adenosine deaminase, RNA-specific, B1 (ADARB1), transcript variant 7, mRNA.	6	3	3	8		2	5	5	12	1		1.98347	0	6.08828	1.42888	4.58337	2.8168	0	2.4777	9.15961	0.746436	3.92465	4.01284	3.26168	1.15794	0.827273	0
srna4627830	TAAAGCAATACACTGAA	17	1	chr21	46613684	46613700	+	EXACT	refGene	NM_015833	ADARB1	46494492	46646478	+	Homo sapiens adenosine deaminase, RNA-specific, B1 (ADARB1), transcript variant 2, mRNA.	6	3	3	8		2	5	5	12	1		1.98347	0	6.08828	1.42888	4.58337	2.8168	0	2.4777	9.15961	0.746436	3.92465	4.01284	3.26168	1.15794	0.827273	0
srna4627830	TAAAGCAATACACTGAA	17	1	chr21	46613684	46613700	+	EXACT	refGene	NM_015834	ADARB1	46494492	46646478	+	Homo sapiens adenosine deaminase, RNA-specific, B1 (ADARB1), transcript variant 3, mRNA.	6	3	3	8		2	5	5	12	1		1.98347	0	6.08828	1.42888	4.58337	2.8168	0	2.4777	9.15961	0.746436	3.92465	4.01284	3.26168	1.15794	0.827273	0
srna4627830	TAAAGCAATACACTGAA	17	1	chr21	46613684	46613700	+	EXACT	refGene	NR_027672	ADARB1	46494492	46646478	+	Homo sapiens adenosine deaminase, RNA-specific, B1 (ADARB1), transcript variant 5, non-coding RNA.	6	3	3	8		2	5	5	12	1		1.98347	0	6.08828	1.42888	4.58337	2.8168	0	2.4777	9.15961	0.746436	3.92465	4.01284	3.26168	1.15794	0.827273	0
srna4627830	TAAAGCAATACACTGAA	17	1	chr21	46613684	46613700	+	EXACT	refGene	NR_027673	ADARB1	46494492	46646478	+	Homo sapiens adenosine deaminase, RNA-specific, B1 (ADARB1), transcript variant 4, non-coding RNA.	6	3	3	8		2	5	5	12	1		1.98347	0	6.08828	1.42888	4.58337	2.8168	0	2.4777	9.15961	0.746436	3.92465	4.01284	3.26168	1.15794	0.827273	0
srna984423	AGAGAAGCCTAGGCACAAGAGTGATG	26	1	chr10	111883816	111883841	+	EXACT	refGene	NM_001121	ADD3	111767710	111895323	+	Homo sapiens adducin 3 (gamma) (ADD3), transcript variant 3, mRNA.	1	10	4			5	1	1	4	3		2.64463	0	0	3.57219	0.916674	1.4267	0	8.259	3.0532	2.23931	0.654108	0.802568	2.84112	1.9914	0.419293	0
srna984423	AGAGAAGCCTAGGCACAAGAGTGATG	26	1	chr10	111883816	111883841	+	EXACT	refGene	NM_016824	ADD3	111767710	111895323	+	Homo sapiens adducin 3 (gamma) (ADD3), transcript variant 1, mRNA.	1	10	4			5	1	1	4	3		2.64463	0	0	3.57219	0.916674	1.4267	0	8.259	3.0532	2.23931	0.654108	0.802568	2.84112	1.9914	0.419293	0
srna984423	AGAGAAGCCTAGGCACAAGAGTGATG	26	1	chr10	111883816	111883841	+	EXACT	refGene	NM_019903	ADD3	111765725	111895323	+	Homo sapiens adducin 3 (gamma) (ADD3), transcript variant 2, mRNA.	1	10	4			5	1	1	4	3		2.64463	0	0	3.57219	0.916674	1.4267	0	8.259	3.0532	2.23931	0.654108	0.802568	2.84112	1.9914	0.419293	0
srna2736647	CGGACTACCCCGAGTA	16	1	chr21	45389138	45389153	+	EXACT	refGene	NM_001037553	AGPAT3	45345278	45407475	+	Homo sapiens 1-acylglycerol-3-phosphate O-acyltransferase 3 (AGPAT3), transcript variant 2, mRNA.		29	18	13	1	1	7	9	22	10		11.9008	0.736106	9.89346	0.714439	6.41672	5.93231	0	23.9511	16.7926	7.46436	0	7.22311	9.64162	1.62527	0.507658	0
srna2736647	CGGACTACCCCGAGTA	16	1	chr21	45389138	45389153	+	EXACT	refGene	NM_020132	AGPAT3	45285115	45407475	+	Homo sapiens 1-acylglycerol-3-phosphate O-acyltransferase 3 (AGPAT3), transcript variant 1, mRNA.		29	18	13	1	1	7	9	22	10		11.9008	0.736106	9.89346	0.714439	6.41672	5.93231	0	23.9511	16.7926	7.46436	0	7.22311	9.64162	1.62527	0.507658	0
srna4152681	GGCTTTGGCACTGATAGAACTCTATAATGCACCCGAG	37	1	chr1	110562169	110562205	+	EXACT	refGene	NM_001242673	AHCYL1	110527386	110566364	+	Homo sapiens adenosylhomocysteinase-like 1 (AHCYL1), transcript variant 2, mRNA.	1	10	7			5	4	3	5	6		4.6281	0	0	3.57219	3.6667	2.3734	0	8.259	3.8165	4.47861	0.654108	2.4077	3.44165	1.45009	0.567824	0
srna4152681	GGCTTTGGCACTGATAGAACTCTATAATGCACCCGAG	37	1	chr1	110562169	110562205	+	EXACT	refGene	NM_001242674	AHCYL1	110543548	110566364	+	Homo sapiens adenosylhomocysteinase-like 1 (AHCYL1), transcript variant 3, mRNA.	1	10	7			5	4	3	5	6		4.6281	0	0	3.57219	3.6667	2.3734	0	8.259	3.8165	4.47861	0.654108	2.4077	3.44165	1.45009	0.567824	0
srna4152681	GGCTTTGGCACTGATAGAACTCTATAATGCACCCGAG	37	1	chr1	110562169	110562205	+	EXACT	refGene	NM_001242675	AHCYL1	110546569	110566364	+	Homo sapiens adenosylhomocysteinase-like 1 (AHCYL1), transcript variant 4, mRNA.	1	10	7			5	4	3	5	6		4.6281	0	0	3.57219	3.6667	2.3734	0	8.259	3.8165	4.47861	0.654108	2.4077	3.44165	1.45009	0.567824	0
srna4152681	GGCTTTGGCACTGATAGAACTCTATAATGCACCCGAG	37	1	chr1	110562169	110562205	+	EXACT	refGene	NM_001242676	AHCYL1	110546569	110566364	+	Homo sapiens adenosylhomocysteinase-like 1 (AHCYL1), transcript variant 5, mRNA.	1	10	7			5	4	3	5	6		4.6281	0	0	3.57219	3.6667	2.3734	0	8.259	3.8165	4.47861	0.654108	2.4077	3.44165	1.45009	0.567824	0
srna4152681	GGCTTTGGCACTGATAGAACTCTATAATGCACCCGAG	37	1	chr1	110562169	110562205	+	EXACT	refGene	NM_006621	AHCYL1	110527386	110566364	+	Homo sapiens adenosylhomocysteinase-like 1 (AHCYL1), transcript variant 1, mRNA.	1	10	7			5	4	3	5	6		4.6281	0	0	3.57219	3.6667	2.3734	0	8.259	3.8165	4.47861	0.654108	2.4077	3.44165	1.45009	0.567824	0
srna3254230	CTTTGGCACTGATAGAACTCTATAATGCACCCGA	34	1	chr1	110562171	110562204	+	EXACT	refGene	NM_001242673	AHCYL1	110527386	110566364	+	Homo sapiens adenosylhomocysteinase-like 1 (AHCYL1), transcript variant 2, mRNA.		21	2	1		1	6	15	9			1.32231	0	0.761035	0.714439	5.50005	1.65957	0	17.3439	6.8697	0	0	12.0385	4.84272	2.91806	0.41206	0
srna3254230	CTTTGGCACTGATAGAACTCTATAATGCACCCGA	34	1	chr1	110562171	110562204	+	EXACT	refGene	NM_001242674	AHCYL1	110543548	110566364	+	Homo sapiens adenosylhomocysteinase-like 1 (AHCYL1), transcript variant 3, mRNA.		21	2	1		1	6	15	9			1.32231	0	0.761035	0.714439	5.50005	1.65957	0	17.3439	6.8697	0	0	12.0385	4.84272	2.91806	0.41206	0
srna3254230	CTTTGGCACTGATAGAACTCTATAATGCACCCGA	34	1	chr1	110562171	110562204	+	EXACT	refGene	NM_001242675	AHCYL1	110546569	110566364	+	Homo sapiens adenosylhomocysteinase-like 1 (AHCYL1), transcript variant 4, mRNA.		21	2	1		1	6	15	9			1.32231	0	0.761035	0.714439	5.50005	1.65957	0	17.3439	6.8697	0	0	12.0385	4.84272	2.91806	0.41206	0
srna3254230	CTTTGGCACTGATAGAACTCTATAATGCACCCGA	34	1	chr1	110562171	110562204	+	EXACT	refGene	NM_001242676	AHCYL1	110546569	110566364	+	Homo sapiens adenosylhomocysteinase-like 1 (AHCYL1), transcript variant 5, mRNA.		21	2	1		1	6	15	9			1.32231	0	0.761035	0.714439	5.50005	1.65957	0	17.3439	6.8697	0	0	12.0385	4.84272	2.91806	0.41206	0
srna3254230	CTTTGGCACTGATAGAACTCTATAATGCACCCGA	34	1	chr1	110562171	110562204	+	EXACT	refGene	NM_006621	AHCYL1	110527386	110566364	+	Homo sapiens adenosylhomocysteinase-like 1 (AHCYL1), transcript variant 1, mRNA.		21	2	1		1	6	15	9			1.32231	0	0.761035	0.714439	5.50005	1.65957	0	17.3439	6.8697	0	0	12.0385	4.84272	2.91806	0.41206	0
srna6192800	TTTGGCACTGATAGAACTCTATAATGCACCCGA	33	1	chr1	110562172	110562204	+	EXACT	refGene	NM_001242673	AHCYL1	110527386	110566364	+	Homo sapiens adenosylhomocysteinase-like 1 (AHCYL1), transcript variant 2, mRNA.		14	5	1			3	8	4	1		3.30579	0	0.761035	0	2.75002	1.36337	0	11.5626	3.0532	0.746436	0	6.42055	3.07245	2.25357	0.492829	0
srna6192800	TTTGGCACTGATAGAACTCTATAATGCACCCGA	33	1	chr1	110562172	110562204	+	EXACT	refGene	NM_001242674	AHCYL1	110543548	110566364	+	Homo sapiens adenosylhomocysteinase-like 1 (AHCYL1), transcript variant 3, mRNA.		14	5	1			3	8	4	1		3.30579	0	0.761035	0	2.75002	1.36337	0	11.5626	3.0532	0.746436	0	6.42055	3.07245	2.25357	0.492829	0
srna6192800	TTTGGCACTGATAGAACTCTATAATGCACCCGA	33	1	chr1	110562172	110562204	+	EXACT	refGene	NM_001242675	AHCYL1	110546569	110566364	+	Homo sapiens adenosylhomocysteinase-like 1 (AHCYL1), transcript variant 4, mRNA.		14	5	1			3	8	4	1		3.30579	0	0.761035	0	2.75002	1.36337	0	11.5626	3.0532	0.746436	0	6.42055	3.07245	2.25357	0.492829	0
srna6192800	TTTGGCACTGATAGAACTCTATAATGCACCCGA	33	1	chr1	110562172	110562204	+	EXACT	refGene	NM_001242676	AHCYL1	110546569	110566364	+	Homo sapiens adenosylhomocysteinase-like 1 (AHCYL1), transcript variant 5, mRNA.		14	5	1			3	8	4	1		3.30579	0	0.761035	0	2.75002	1.36337	0	11.5626	3.0532	0.746436	0	6.42055	3.07245	2.25357	0.492829	0
srna6192800	TTTGGCACTGATAGAACTCTATAATGCACCCGA	33	1	chr1	110562172	110562204	+	EXACT	refGene	NM_006621	AHCYL1	110527386	110566364	+	Homo sapiens adenosylhomocysteinase-like 1 (AHCYL1), transcript variant 1, mRNA.		14	5	1			3	8	4	1		3.30579	0	0.761035	0	2.75002	1.36337	0	11.5626	3.0532	0.746436	0	6.42055	3.07245	2.25357	0.492829	0
srna2773865	CGGCGGCGGGAAAAC	15	1	chr1	27901679	27901693	-	EXACT	refGene	NM_001029882	AHDC1	27860755	27930143	-	Homo sapiens AT hook, DNA binding motif, containing 1 (AHDC1), mRNA.	42	4	31	39	43	7	19	11	18	9	9	20.4959	31.6526	29.6804	5.00107	17.4168	20.8493	5.31318	3.3036	13.7394	6.71792	27.4725	8.82825	11.3093	0.542431	0.180861	0
srna3659687	GCACCCGGGGGGCCG	15	1	chr13	42846710	42846724	-	EXACT	refGene	NM_016248	AKAP11	42846288	42897403	+	Homo sapiens A kinase (PRKA) anchor protein 11 (AKAP11), mRNA.		10	4	2		2	9	5	2		2	2.64463	0	1.52207	1.42888	8.25007	2.76913	1.18071	8.259	1.5266	0	0	4.01284	2.19326	0.79204	0.791771	0
srna4145806	GGCTGGTCCGATGGTAGTGGGTTATCAGAAAT	32	1	chr6	151620037	151620068	-	EXACT	refGene	NM_005100	AKAP12	151561133	151679694	+	Homo sapiens A kinase (PRKA) anchor protein 12 (AKAP12), transcript variant 1, mRNA.	44	103	72	26	71	56	71	60	23	37	418	47.6033	52.2635	19.7869	40.0086	65.0839	44.9492	246.768	85.0677	17.5559	27.6181	28.7807	48.1541	81.1581	1.80555	0.451571	0
srna4145808	GGCTGGTCCGATGGTAGTGGGTTATCAGAAATT	33	1	chr6	151620036	151620068	-	EXACT	refGene	NM_005100	AKAP12	151561133	151679694	+	Homo sapiens A kinase (PRKA) anchor protein 12 (AKAP12), transcript variant 1, mRNA.	18	38	30	13	15	17	19	25	20	18	82	19.8347	11.0416	9.89346	12.1455	17.4168	14.0664	48.409	31.3842	15.266	13.4358	11.7739	20.0642	24.0538	1.71002	0.233647	0
srna4145795	GGCTGGTCCGATGGTAGTGGGTTATCAGAAA	31	1	chr6	151620038	151620068	-	EXACT	refGene	NM_005100	AKAP12	151561133	151679694	+	Homo sapiens A kinase (PRKA) anchor protein 12 (AKAP12), transcript variant 1, mRNA.	11	10	10	6	13	19	7	8	7	5	29	6.61157	9.56938	4.56621	13.5743	6.41672	8.14764	17.1203	8.259	5.3431	3.73218	7.19519	6.42055	8.32995	1.02237	0.950136	0
srna4145809	GGCTGGTCCGATGGTAGTGGGTTATCAGAAATTA	34	1	chr6	151620035	151620068	-	EXACT	refGene	NM_005100	AKAP12	151561133	151679694	+	Homo sapiens A kinase (PRKA) anchor protein 12 (AKAP12), transcript variant 1, mRNA.	2	7	7	1	5	4	5	1	2	6	12	4.6281	3.68053	0.761035	2.85776	4.58337	3.30216	7.08424	5.7813	1.5266	4.47861	1.30822	0.802568	4.0358	1.22217	0.604527	0
srna3970114	GCTGGTCCGATGGTAGTGGGTTATCAGAAAT	31	1	chr6	151620037	151620067	-	EXACT	refGene	NM_005100	AKAP12	151561133	151679694	+	Homo sapiens A kinase (PRKA) anchor protein 12 (AKAP12), transcript variant 1, mRNA.	2	4	2	1	3		3	4	3	1	23	1.32231	2.20832	0.761035	0	2.75002	1.40834	13.5781	3.3036	2.2899	0.746436	1.30822	3.21027	4.24526	3.01437	0.302067	0
srna4145708	GGCTGGTCCGATGGTAGTGGGTTATCAAAAA	31	1	chr6	151620038	151620068	-	EXACT	refGene	NM_005100	AKAP12	151561133	151679694	+	Homo sapiens A kinase (PRKA) anchor protein 12 (AKAP12), transcript variant 1, mRNA.		4			1	1	2	1			10	0	0.736106	0	0.714439	1.83335	0.656779	5.90354	3.3036	0	0	0	0.802568	1.84143	2.80373	0.388864	0
srna5664346	TGGTCCGATGGTAGTGGGTTATCAGAAAT	29	1	chr6	151620037	151620065	-	EXACT	refGene	NM_005100	AKAP12	151561133	151679694	+	Homo sapiens A kinase (PRKA) anchor protein 12 (AKAP12), transcript variant 1, mRNA.	2	1			1			1	1	1	10	0	0.736106	0	0	0	0.147221	5.90354	0.8259	0.763301	0.746436	1.30822	0.802568	1.90948	12.9701	0.154446	0
srna102307	AAAGACATAGGATAGAGTCACCT	23	1	chr19	40788511	40788533	-	EXACT	refGene	NM_001243027	AKT2	40736223	40791302	-	Homo sapiens v-akt murine thymoma viral oncogene homolog 2 (AKT2), transcript variant 2, mRNA.	45	20	29	24	61	48	28	24	16	15	17	19.1736	44.9025	18.2648	34.2931	25.6669	28.4602	10.036	16.518	12.2128	11.1965	29.4349	19.2616	15.8796	0.55796	0.0787597	0
srna102307	AAAGACATAGGATAGAGTCACCT	23	1	chr19	40788511	40788533	-	EXACT	refGene	NM_001243028	AKT2	40736223	40791302	-	Homo sapiens v-akt murine thymoma viral oncogene homolog 2 (AKT2), transcript variant 3, mRNA.	45	20	29	24	61	48	28	24	16	15	17	19.1736	44.9025	18.2648	34.2931	25.6669	28.4602	10.036	16.518	12.2128	11.1965	29.4349	19.2616	15.8796	0.55796	0.0787597	0
srna102307	AAAGACATAGGATAGAGTCACCT	23	1	chr19	40788511	40788533	-	EXACT	refGene	NM_001626	AKT2	40736223	40791302	-	Homo sapiens v-akt murine thymoma viral oncogene homolog 2 (AKT2), transcript variant 1, mRNA.	45	20	29	24	61	48	28	24	16	15	17	19.1736	44.9025	18.2648	34.2931	25.6669	28.4602	10.036	16.518	12.2128	11.1965	29.4349	19.2616	15.8796	0.55796	0.0787597	0
srna102309	AAAGACATAGGATAGAGTCACCTC	24	1	chr19	40788510	40788533	-	EXACT	refGene	NM_001243027	AKT2	40736223	40791302	-	Homo sapiens v-akt murine thymoma viral oncogene homolog 2 (AKT2), transcript variant 2, mRNA.	17	7	10	6	19	11	10	7	11	9	10	6.61157	13.986	4.56621	7.85883	9.16674	8.43787	5.90354	5.7813	8.39631	6.71792	11.1198	5.61798	7.58378	0.898779	0.662226	0
srna102309	AAAGACATAGGATAGAGTCACCTC	24	1	chr19	40788510	40788533	-	EXACT	refGene	NM_001243028	AKT2	40736223	40791302	-	Homo sapiens v-akt murine thymoma viral oncogene homolog 2 (AKT2), transcript variant 3, mRNA.	17	7	10	6	19	11	10	7	11	9	10	6.61157	13.986	4.56621	7.85883	9.16674	8.43787	5.90354	5.7813	8.39631	6.71792	11.1198	5.61798	7.58378	0.898779	0.662226	0
srna102309	AAAGACATAGGATAGAGTCACCTC	24	1	chr19	40788510	40788533	-	EXACT	refGene	NM_001626	AKT2	40736223	40791302	-	Homo sapiens v-akt murine thymoma viral oncogene homolog 2 (AKT2), transcript variant 1, mRNA.	17	7	10	6	19	11	10	7	11	9	10	6.61157	13.986	4.56621	7.85883	9.16674	8.43787	5.90354	5.7813	8.39631	6.71792	11.1198	5.61798	7.58378	0.898779	0.662226	0
srna5385135	TGACTGTCCTATGTCTTTCCT	21	1	chr19	40788463	40788483	-	EXACT	refGene	NM_001243027	AKT2	40736223	40791302	-	Homo sapiens v-akt murine thymoma viral oncogene homolog 2 (AKT2), transcript variant 2, mRNA.	15	5	11	6	13	11	12	12	5	3	4	7.27273	9.56938	4.56621	7.85883	11.0001	8.05345	2.36141	4.1295	3.8165	2.23931	9.81162	9.63082	4.47167	0.555249	0.0788748	0
srna5385135	TGACTGTCCTATGTCTTTCCT	21	1	chr19	40788463	40788483	-	EXACT	refGene	NM_001243028	AKT2	40736223	40791302	-	Homo sapiens v-akt murine thymoma viral oncogene homolog 2 (AKT2), transcript variant 3, mRNA.	15	5	11	6	13	11	12	12	5	3	4	7.27273	9.56938	4.56621	7.85883	11.0001	8.05345	2.36141	4.1295	3.8165	2.23931	9.81162	9.63082	4.47167	0.555249	0.0788748	0
srna5385135	TGACTGTCCTATGTCTTTCCT	21	1	chr19	40788463	40788483	-	EXACT	refGene	NM_001626	AKT2	40736223	40791302	-	Homo sapiens v-akt murine thymoma viral oncogene homolog 2 (AKT2), transcript variant 1, mRNA.	15	5	11	6	13	11	12	12	5	3	4	7.27273	9.56938	4.56621	7.85883	11.0001	8.05345	2.36141	4.1295	3.8165	2.23931	9.81162	9.63082	4.47167	0.555249	0.0788748	0
srna102303	AAAGACATAGGATAGAGTCACC	22	1	chr19	40788512	40788533	-	EXACT	refGene	NM_001243027	AKT2	40736223	40791302	-	Homo sapiens v-akt murine thymoma viral oncogene homolog 2 (AKT2), transcript variant 2, mRNA.	7	9	8	6	16	11	3	10	2	5	3	5.28926	11.7777	4.56621	7.85883	2.75002	6.4484	1.77106	7.4331	1.5266	3.73218	4.57875	8.02568	3.80834	0.590587	0.206348	0
srna102303	AAAGACATAGGATAGAGTCACC	22	1	chr19	40788512	40788533	-	EXACT	refGene	NM_001243028	AKT2	40736223	40791302	-	Homo sapiens v-akt murine thymoma viral oncogene homolog 2 (AKT2), transcript variant 3, mRNA.	7	9	8	6	16	11	3	10	2	5	3	5.28926	11.7777	4.56621	7.85883	2.75002	6.4484	1.77106	7.4331	1.5266	3.73218	4.57875	8.02568	3.80834	0.590587	0.206348	0
srna102303	AAAGACATAGGATAGAGTCACC	22	1	chr19	40788512	40788533	-	EXACT	refGene	NM_001626	AKT2	40736223	40791302	-	Homo sapiens v-akt murine thymoma viral oncogene homolog 2 (AKT2), transcript variant 1, mRNA.	7	9	8	6	16	11	3	10	2	5	3	5.28926	11.7777	4.56621	7.85883	2.75002	6.4484	1.77106	7.4331	1.5266	3.73218	4.57875	8.02568	3.80834	0.590587	0.206348	0
srna317790	AAGACATAGGATAGAGTCACCT	22	1	chr19	40788511	40788532	-	EXACT	refGene	NM_001243027	AKT2	40736223	40791302	-	Homo sapiens v-akt murine thymoma viral oncogene homolog 2 (AKT2), transcript variant 2, mRNA.	8		9	1	12	7	6	5	3	1	3	5.95041	8.83327	0.761035	5.00107	5.50005	5.20917	1.77106	0	2.2899	0.746436	5.23286	4.01284	2.00805	0.385484	0.0812622	0
srna317790	AAGACATAGGATAGAGTCACCT	22	1	chr19	40788511	40788532	-	EXACT	refGene	NM_001243028	AKT2	40736223	40791302	-	Homo sapiens v-akt murine thymoma viral oncogene homolog 2 (AKT2), transcript variant 3, mRNA.	8		9	1	12	7	6	5	3	1	3	5.95041	8.83327	0.761035	5.00107	5.50005	5.20917	1.77106	0	2.2899	0.746436	5.23286	4.01284	2.00805	0.385484	0.0812622	0
srna317790	AAGACATAGGATAGAGTCACCT	22	1	chr19	40788511	40788532	-	EXACT	refGene	NM_001626	AKT2	40736223	40791302	-	Homo sapiens v-akt murine thymoma viral oncogene homolog 2 (AKT2), transcript variant 1, mRNA.	8		9	1	12	7	6	5	3	1	3	5.95041	8.83327	0.761035	5.00107	5.50005	5.20917	1.77106	0	2.2899	0.746436	5.23286	4.01284	2.00805	0.385484	0.0812622	0
srna3402645	GACCTCAGAGGGGGCACC	18	1	chr2	202572127	202572144	+	EXACT	refGene	NM_020919	ALS2	202564985	202645895	-	Homo sapiens amyotrophic lateral sclerosis 2 (juvenile) (ALS2), transcript variant 1, mRNA.	1	7	5	10	19	16	6	11	8	7	12	3.30579	13.986	7.61035	11.431	5.50005	8.36664	7.08424	5.7813	6.1064	5.22505	0.654108	8.82825	4.97022	0.594052	0.177433	0
srna5158959	TCCTGTACTGAGCTGCCCCGAGG	23	1	chr8	41518001	41518023	-	EXACT	refGene	NM_000037	ANK1	41510743	41655140	-	Homo sapiens ankyrin 1, erythrocytic (ANK1), transcript variant 3, mRNA.	3		7	1	13	3	1	1	8	5	3	4.6281	9.56938	0.761035	2.14332	0.916674	3.6037	1.77106	0	6.1064	3.73218	1.96232	0.802568	2.71439	0.753224	0.66143	0
srna5158959	TCCTGTACTGAGCTGCCCCGAGG	23	1	chr8	41518001	41518023	-	EXACT	refGene	NM_001142445	ANK1	41510743	41522804	-	Homo sapiens ankyrin 1, erythrocytic (ANK1), transcript variant 10, mRNA.	3		7	1	13	3	1	1	8	5	3	4.6281	9.56938	0.761035	2.14332	0.916674	3.6037	1.77106	0	6.1064	3.73218	1.96232	0.802568	2.71439	0.753224	0.66143	0
srna5158959	TCCTGTACTGAGCTGCCCCGAGG	23	1	chr8	41518001	41518023	-	EXACT	refGene	NM_001142446	ANK1	41510743	41754280	-	Homo sapiens ankyrin 1, erythrocytic (ANK1), transcript variant 9, mRNA.	3		7	1	13	3	1	1	8	5	3	4.6281	9.56938	0.761035	2.14332	0.916674	3.6037	1.77106	0	6.1064	3.73218	1.96232	0.802568	2.71439	0.753224	0.66143	0
srna5158959	TCCTGTACTGAGCTGCCCCGAGG	23	1	chr8	41518001	41518023	-	EXACT	refGene	NM_020475	ANK1	41510743	41655140	-	Homo sapiens ankyrin 1, erythrocytic (ANK1), transcript variant 4, mRNA.	3		7	1	13	3	1	1	8	5	3	4.6281	9.56938	0.761035	2.14332	0.916674	3.6037	1.77106	0	6.1064	3.73218	1.96232	0.802568	2.71439	0.753224	0.66143	0
srna5158959	TCCTGTACTGAGCTGCCCCGAGG	23	1	chr8	41518001	41518023	-	EXACT	refGene	NM_020476	ANK1	41510743	41655140	-	Homo sapiens ankyrin 1, erythrocytic (ANK1), transcript variant 1, mRNA.	3		7	1	13	3	1	1	8	5	3	4.6281	9.56938	0.761035	2.14332	0.916674	3.6037	1.77106	0	6.1064	3.73218	1.96232	0.802568	2.71439	0.753224	0.66143	0
srna5158959	TCCTGTACTGAGCTGCCCCGAGG	23	1	chr8	41518001	41518023	-	EXACT	refGene	NM_020477	ANK1	41510743	41655140	-	Homo sapiens ankyrin 1, erythrocytic (ANK1), transcript variant 2, mRNA.	3		7	1	13	3	1	1	8	5	3	4.6281	9.56938	0.761035	2.14332	0.916674	3.6037	1.77106	0	6.1064	3.73218	1.96232	0.802568	2.71439	0.753224	0.66143	0
srna5158959	TCCTGTACTGAGCTGCCCCGAGG	23	1	chr8	41518001	41518023	-	EXACT	refGene	NM_020478	ANK1	41510743	41522804	-	Homo sapiens ankyrin 1, erythrocytic (ANK1), transcript variant 5, mRNA.	3		7	1	13	3	1	1	8	5	3	4.6281	9.56938	0.761035	2.14332	0.916674	3.6037	1.77106	0	6.1064	3.73218	1.96232	0.802568	2.71439	0.753224	0.66143	0
srna5158959	TCCTGTACTGAGCTGCCCCGAGG	23	1	chr8	41518001	41518023	-	EXACT	refGene	NM_020480	ANK1	41510743	41522804	-	Homo sapiens ankyrin 1, erythrocytic (ANK1), transcript variant 7, mRNA.	3		7	1	13	3	1	1	8	5	3	4.6281	9.56938	0.761035	2.14332	0.916674	3.6037	1.77106	0	6.1064	3.73218	1.96232	0.802568	2.71439	0.753224	0.66143	0
srna986325	AGAGAATGGTTTAAATT	17	1	chr7	92017252	92017268	+	EXACT	refGene	NM_019004	ANKIB1	91875547	92030698	+	Homo sapiens ankyrin repeat and IBR domain containing 1 (ANKIB1), mRNA.	10	2	7	15	5	15	9	7	5	7	4	4.6281	3.68053	11.4155	10.7166	8.25007	7.73816	2.36141	1.6518	3.8165	5.22505	6.54108	5.61798	3.91917	0.506473	0.0755797	0
srna3050203	CTGAAGACTACGCCA	15	1	chr7	16657068	16657082	+	EXACT	refGene	NM_020319	ANKMY2	16639400	16685442	-	Homo sapiens ankyrin repeat and MYND domain containing 2 (ANKMY2), mRNA.	11	1		1	12	9	2	2	1		6	0	8.83327	0.761035	6.42995	1.83335	3.57152	3.54212	0.8259	0.763301	0	7.19519	1.60514	2.4653	0.690267	0.625841	0
srna3909393	GCGTTGGTATAGTGGTGAGCATAGCTGCCT	30	1	chr3	15847986	15848013	-	CLIPPED	refGene	NM_015199	ANKRD28	15708743	15901053	-	Homo sapiens ankyrin repeat domain 28 (ANKRD28), transcript variant 1, mRNA.	8	3	6	4	12	15	11	5	5	7	1	3.96694	8.83327	3.04414	10.7166	10.0834	7.32887	0.590354	2.4777	3.8165	5.22505	5.23286	4.01284	3.46849	0.473264	0.0769835	0
srna2761640	CGGCCCCGGGTTCCTCCCGGGGCTACGCCTGTCTGAGCG	39	1	chr2	133010730	133010767	-	MISMATCH/INDEL	refGene	NR_027020	ANKRD30BL	132905163	133015542	-	Homo sapiens ankyrin repeat domain 30B-like (ANKRD30BL), transcript variant 2, non-coding RNA.	473	367	282	300	211	334	145	352	606	449	400	186.446	155.318	228.311	238.623	132.918	188.323	236.141	303.105	462.56	335.15	309.393	282.504	329.27	1.74843	0.0150406	1
srna44474	AAAAGTCGTAACAAGGTTTCCGTAGGTGAACCTG	34	1	chr2	133011934	133011967	-	EXACT	refGene	NR_027020	ANKRD30BL	132905163	133015542	-	Homo sapiens ankyrin repeat domain 30B-like (ANKRD30BL), transcript variant 2, non-coding RNA.	263	108	31	115	89	389	64	39	197	153	341	20.4959	65.5134	87.519	277.917	58.6672	102.022	201.311	89.1972	150.37	114.205	172.03	31.3002	145.423	1.4254	0.417222	1
srna971088	AGACGGTCGAACTTGACTATCTAGAGGAAGTAAAAGTCG	39	1	chr2	133011960	133011998	-	EXACT	refGene	NR_027020	ANKRD30BL	132905163	133015542	-	Homo sapiens ankyrin repeat domain 30B-like (ANKRD30BL), transcript variant 2, non-coding RNA.	202	100	177	50	72	134	43	49	84	95	112	117.025	52.9996	38.0518	95.7348	39.417	68.6456	66.1196	82.59	64.1172	70.9114	132.13	39.3258	83.1736	1.21164	0.497335	0
srna2835054	CGTAACAAGGTTTCCGTAGGTGAACCTGCGGAAGGATCA	39	1	chr2	133011923	133011961	-	EXACT	refGene	NR_027020	ANKRD30BL	132905163	133015542	-	Homo sapiens ankyrin repeat domain 30B-like (ANKRD30BL), transcript variant 2, non-coding RNA.	86	56	17	98	74	210	44	19	82	56	102	11.2397	54.4718	74.5814	150.032	40.3337	66.1318	60.2161	46.2504	62.5906	41.8004	56.2533	15.2488	53.4222	0.807814	0.618939	0
srna4101237	GGCCCTGGCGGAGCGCTGAGAAGACGGTCGAACTTGAC	38	1	chr2	133011982	133012018	-	CLIPPED	refGene	NR_027020	ANKRD30BL	132905163	133015542	-	Homo sapiens ankyrin repeat domain 30B-like (ANKRD30BL), transcript variant 2, non-coding RNA.	12	92	102	17	5	31	43	77	48	46	11	67.438	3.68053	12.9376	22.1476	39.417	29.1241	6.49389	75.9828	36.6384	34.336	7.84929	61.7978	32.2601	1.10768	0.85765	0
srna3800041	GCCCTGGCGGAGCGCTGAGAAGACGGTCGAACTTGACTA	39	1	chr2	133011980	133012018	-	EXACT	refGene	NR_027020	ANKRD30BL	132905163	133015542	-	Homo sapiens ankyrin repeat domain 30B-like (ANKRD30BL), transcript variant 2, non-coding RNA.	52	145	89	23	10	28	39	87	71	39	13	58.843	7.36106	17.5038	20.0043	35.7503	27.8925	7.6746	119.756	54.1943	29.111	34.0136	69.8234	48.9498	1.75495	0.360649	0
srna800592	ACGGCCCTGGCGGAGCGCTGAGAAGACGGTCGAACT	36	1	chr2	133011986	133012021	-	EXACT	refGene	NR_027020	ANKRD30BL	132905163	133015542	-	Homo sapiens ankyrin repeat domain 30B-like (ANKRD30BL), transcript variant 2, non-coding RNA.	7	36	76	18	7	33	25	32	36	59	4	50.2479	5.15274	13.6986	23.5765	22.9169	23.1185	2.36141	29.7324	27.4788	44.0397	4.57875	25.6822	21.6382	0.935969	0.896107	0
srna5607910	TGGCGGAGCGCTGAGAAGACGGTCGAACTTGAC	33	1	chr2	133011982	133012014	-	EXACT	refGene	NR_027020	ANKRD30BL	132905163	133015542	-	Homo sapiens ankyrin repeat domain 30B-like (ANKRD30BL), transcript variant 2, non-coding RNA.	24	57	44	19	24	21	26	24	23	55	36	29.0909	17.6665	14.4597	15.0032	23.8335	20.0108	21.2527	47.0763	17.5559	41.054	15.6986	19.2616	28.5275	1.42561	0.277444	0
srna2386744	CCCTGGCGGAGCGCTGAGAAGACGGTCGAAC	31	1	chr2	133011987	133012017	-	EXACT	refGene	NR_027020	ANKRD30BL	132905163	133015542	-	Homo sapiens ankyrin repeat domain 30B-like (ANKRD30BL), transcript variant 2, non-coding RNA.	19	60	41	15	9	20	24	34	33	29	8	27.1074	6.62495	11.4155	14.2888	22.0002	16.2874	4.72283	49.554	25.1889	21.6466	12.428	27.2873	22.7081	1.39421	0.47719	0
srna2273635	CCCAACTTCTTAGAGGGACAAGTGGCGTTCAGCCAC	36	1	chr2	133012311	133012346	-	EXACT	refGene	NR_027020	ANKRD30BL	132905163	133015542	-	Homo sapiens ankyrin repeat domain 30B-like (ANKRD30BL), transcript variant 2, non-coding RNA.	78	47	40	22	8	28	11	30	42	40	24	26.4463	5.88885	16.7428	20.0043	10.0834	15.8331	14.1685	38.8173	32.0586	29.8574	51.0204	24.077	33.1845	2.09589	0.0450163	0
srna758345	ACGAAAGTCGGAGGTTCGAAG	21	1	chr2	133012732	133012752	-	EXACT	refGene	NR_027020	ANKRD30BL	132905163	133015542	-	Homo sapiens ankyrin repeat domain 30B-like (ANKRD30BL), transcript variant 2, non-coding RNA.	10	10	19	16	33	15	20	31	19	20	12	12.562	24.2915	12.1766	10.7166	18.3335	15.616	7.08424	8.259	14.5027	14.9287	6.54108	24.8796	10.2631	0.657219	0.128817	0
srna3800026	GCCCTGGCGGAGCGCTGAGAAGACGGTCGAAC	32	1	chr2	133011987	133012018	-	EXACT	refGene	NR_027020	ANKRD30BL	132905163	133015542	-	Homo sapiens ankyrin repeat domain 30B-like (ANKRD30BL), transcript variant 2, non-coding RNA.	13	46	46	13	5	20	19	34	24	39	6	30.4132	3.68053	9.89346	14.2888	17.4168	15.1386	3.54212	37.9914	18.3192	29.111	8.5034	27.2873	19.4934	1.28767	0.592523	0
srna3800040	GCCCTGGCGGAGCGCTGAGAAGACGGTCGAACTTGACT	38	1	chr2	133011981	133012018	-	EXACT	refGene	NR_027020	ANKRD30BL	132905163	133015542	-	Homo sapiens ankyrin repeat domain 30B-like (ANKRD30BL), transcript variant 2, non-coding RNA.	12	60	39	14	5	19	19	44	36	23	8	25.7851	3.68053	10.6545	13.5743	17.4168	14.2223	4.72283	49.554	27.4788	17.168	7.84929	35.313	21.3546	1.50149	0.454793	0
srna5607914	TGGCGGAGCGCTGAGAAGACGGTCGAACTTGACT	34	1	chr2	133011981	133012014	-	EXACT	refGene	NR_027020	ANKRD30BL	132905163	133015542	-	Homo sapiens ankyrin repeat domain 30B-like (ANKRD30BL), transcript variant 2, non-coding RNA.	4	27	29	14	12	12	18	17	24	27	5	19.1736	8.83327	10.6545	8.57327	16.5001	12.7469	2.95177	22.2993	18.3192	20.1538	2.61643	13.6437	13.2681	1.04088	0.917699	0
srna5607919	TGGCGGAGCGCTGAGAAGACGGTCGAACTTGACTATC	37	1	chr2	133011978	133012014	-	EXACT	refGene	NR_027020	ANKRD30BL	132905163	133015542	-	Homo sapiens ankyrin repeat domain 30B-like (ANKRD30BL), transcript variant 2, non-coding RNA.	39	24	22	14	10	22	15	15	15	22	17	14.5455	7.36106	10.6545	15.7177	13.7501	12.4058	10.036	19.8216	11.4495	16.4216	25.5102	12.0385	16.6478	1.34194	0.232729	0
srna2538025	CCTGGCGGAGCGCTGAGAAGACGGTCGAACTTGAC	35	1	chr2	133011982	133012016	-	EXACT	refGene	NR_027020	ANKRD30BL	132905163	133015542	-	Homo sapiens ankyrin repeat domain 30B-like (ANKRD30BL), transcript variant 2, non-coding RNA.	17	42	25	15	14	11	12	19	9	29	17	16.5289	10.3055	11.4155	7.85883	11.0001	11.4218	10.036	34.6878	6.8697	21.6466	11.1198	15.2488	16.872	1.47718	0.354042	0
srna2538029	CCTGGCGGAGCGCTGAGAAGACGGTCGAACTTGACTATC	39	1	chr2	133011978	133012016	-	EXACT	refGene	NR_027020	ANKRD30BL	132905163	133015542	-	Homo sapiens ankyrin repeat domain 30B-like (ANKRD30BL), transcript variant 2, non-coding RNA.	52	55	20	10	11	17	13	19	18	35	16	13.2231	8.09717	7.61035	12.1455	11.9168	10.5986	9.44566	45.4245	13.7394	26.1253	34.0136	15.2488	25.7497	2.42954	0.0820266	0
srna758351	ACGAAAGTCGGAGGTTCGAAGACGATC	27	1	chr2	133012726	133012752	-	EXACT	refGene	NR_027020	ANKRD30BL	132905163	133015542	-	Homo sapiens ankyrin repeat domain 30B-like (ANKRD30BL), transcript variant 2, non-coding RNA.	5	6	29	11	9	5	16	31	22	17	13	19.1736	6.62495	8.37139	3.57219	14.6668	10.4818	7.6746	4.9554	16.7926	12.6894	3.27054	24.8796	9.07651	0.865933	0.719684	0
srna3127494	CTGGCGGAGCGCTGAGAAGACGGTCGAACTTGAC	34	1	chr2	133011982	133012015	-	EXACT	refGene	NR_027020	ANKRD30BL	132905163	133015542	-	Homo sapiens ankyrin repeat domain 30B-like (ANKRD30BL), transcript variant 2, non-coding RNA.	21	68	31	14	2	13	11	20	22	48	13	20.4959	1.47221	10.6545	9.2877	10.0834	10.3987	7.6746	56.1612	16.7926	35.8289	13.7363	16.0514	26.0387	2.50403	0.157375	0
srna1291765	AGTAAAAGTCGTAACAAGGTTTCCGTAGGTGAACCTG	37	1	chr2	133011934	133011970	-	EXACT	refGene	NR_027020	ANKRD30BL	132905163	133015542	-	Homo sapiens ankyrin repeat domain 30B-like (ANKRD30BL), transcript variant 2, non-coding RNA.	36	10	4	11	10	36	7	4	15	20	16	2.64463	7.36106	8.37139	25.7198	6.41672	10.1027	9.44566	8.259	11.4495	14.9287	23.5479	3.21027	13.5262	1.33886	0.504739	0
srna1901270	CACGGCCCTGGCGGAGCGCTGAGAAGACGGTCGAAC	36	1	chr2	133011987	133012022	-	EXACT	refGene	NR_027020	ANKRD30BL	132905163	133015542	-	Homo sapiens ankyrin repeat domain 30B-like (ANKRD30BL), transcript variant 2, non-coding RNA.	4	34	10	8	6	21	18	21	24	8	5	6.61157	4.41664	6.08828	15.0032	16.5001	9.72397	2.95177	28.0806	18.3192	5.97149	2.61643	16.8539	11.5879	1.19168	0.751124	0
srna3800039	GCCCTGGCGGAGCGCTGAGAAGACGGTCGAACTTGAC	37	1	chr2	133011982	133012018	-	EXACT	refGene	NR_027020	ANKRD30BL	132905163	133015542	-	Homo sapiens ankyrin repeat domain 30B-like (ANKRD30BL), transcript variant 2, non-coding RNA.	15	41	29	7	5	7	15	46	19	14	14	19.1736	3.68053	5.32725	5.00107	13.7501	9.3865	8.26495	33.8619	14.5027	10.4501	9.81162	36.9181	15.3783	1.63834	0.322629	0
srna383655	AAGGAATTGACGGAAGGGCACCACCAGGAGTGGAGCC	37	1	chr2	133012546	133012582	-	EXACT	refGene	NR_027020	ANKRD30BL	132905163	133015542	-	Homo sapiens ankyrin repeat domain 30B-like (ANKRD30BL), transcript variant 2, non-coding RNA.	9	25	12	18	10	13	9	13	20	9	25	7.93388	7.36106	13.6986	9.2877	8.25007	9.30627	14.7588	20.6475	15.266	6.71792	5.88697	10.4334	12.6554	1.35988	0.31502	0
srna2745026	CGGAGCGCTGAGAAGACGGTCGAACTTGACTATCT	35	1	chr2	133011977	133012011	-	EXACT	refGene	NR_027020	ANKRD30BL	132905163	133015542	-	Homo sapiens ankyrin repeat domain 30B-like (ANKRD30BL), transcript variant 2, non-coding RNA.	9	8	18	7	6	12	17	6	12	9	19	11.9008	4.41664	5.32725	8.57327	15.5835	9.16029	11.2167	6.6072	9.15961	6.71792	5.88697	4.81541	7.91768	0.864349	0.609685	0
srna3416536	GACGGACCAGAGCGAAAGCATTTGCCAAGAATGTTTTCA	39	1	chr2	133012763	133012794	-	CLIPPED	refGene	NR_027020	ANKRD30BL	132905163	133015542	-	Homo sapiens ankyrin repeat domain 30B-like (ANKRD30BL), transcript variant 2, non-coding RNA.	13	24	18	12	8	16	7	26	53	36	42	11.9008	5.88885	9.13242	11.431	6.41672	8.95397	24.7949	19.8216	40.4549	26.8717	8.5034	20.8668	24.0893	2.69035	0.0413438	0
srna3127497	CTGGCGGAGCGCTGAGAAGACGGTCGAACTTGACT	35	1	chr2	133011981	133012015	-	EXACT	refGene	NR_027020	ANKRD30BL	132905163	133015542	-	Homo sapiens ankyrin repeat domain 30B-like (ANKRD30BL), transcript variant 2, non-coding RNA.	13	23	15	15	11	11	8	17	18	23	4	9.91736	8.09717	11.4155	7.85883	7.33339	8.92445	2.36141	18.9957	13.7394	17.168	8.5034	13.6437	12.1536	1.36183	0.353652	0
srna1796874	CAACTTCTTAGAGGGACAAGTGGCGTTCAGCCACC	35	1	chr2	133012310	133012344	-	EXACT	refGene	NR_027020	ANKRD30BL	132905163	133015542	-	Homo sapiens ankyrin repeat domain 30B-like (ANKRD30BL), transcript variant 2, non-coding RNA.	7	13	26	5	6	14	10	9	6	5	2	17.1901	4.41664	3.80518	10.0021	9.16674	8.91616	1.18071	10.7367	4.5798	3.73218	4.57875	7.22311	4.96163	0.556476	0.212315	0
srna5961012	TTCTATTTTGTTGGTTTTCGGAACT	25	1	chr2	133012875	133012899	-	EXACT	refGene	NR_027020	ANKRD30BL	132905163	133015542	-	Homo sapiens ankyrin repeat domain 30B-like (ANKRD30BL), transcript variant 2, non-coding RNA.	15	14	17	11	9	4	14	22	12	9	1	11.2397	6.62495	8.37139	2.85776	12.8334	8.38544	0.590354	11.5626	9.15961	6.71792	9.81162	17.6565	7.56842	0.902567	0.760854	0
srna3127501	CTGGCGGAGCGCTGAGAAGACGGTCGAACTTGACTATC	38	1	chr2	133011978	133012015	-	EXACT	refGene	NR_027020	ANKRD30BL	132905163	133015542	-	Homo sapiens ankyrin repeat domain 30B-like (ANKRD30BL), transcript variant 2, non-coding RNA.	20	26	18	7	5	10	14	14	16	17	12	11.9008	3.68053	5.32725	7.14439	12.8334	8.17729	7.08424	21.4734	12.2128	12.6894	13.0822	11.236	13.3084	1.62748	0.120535	0
srna44501	AAAAGTCGTAACAAGGTTTCTGTAGGTGAACCTG	34	1	chr2	133011934	133011967	-	EXACT	refGene	NR_027020	ANKRD30BL	132905163	133015542	-	Homo sapiens ankyrin repeat domain 30B-like (ANKRD30BL), transcript variant 2, non-coding RNA.	5			10	7	28	6		8	7	6	0	5.15274	7.61035	20.0043	5.50005	7.65348	3.54212	0	6.1064	5.22505	3.27054	0	3.62882	0.47414	0.303516	0
srna800596	ACGGCCCTGGCGGAGCGCTGAGAAGACGGTCGAACTTGA	39	1	chr2	133011983	133012021	-	EXACT	refGene	NR_027020	ANKRD30BL	132905163	133015542	-	Homo sapiens ankyrin repeat domain 30B-like (ANKRD30BL), transcript variant 2, non-coding RNA.	7	68	28	9	5	6	4	26	20	15	6	18.5124	3.68053	6.84932	4.28663	3.6667	7.39911	3.54212	56.1612	15.266	11.1965	4.57875	20.8668	18.1489	2.45285	0.341175	0
srna1355836	AGTGTTCAAAGCAGGCCCGAGCCGCC	26	1	chr2	133012938	133012963	-	EXACT	refGene	NR_027020	ANKRD30BL	132905163	133015542	-	Homo sapiens ankyrin repeat domain 30B-like (ANKRD30BL), transcript variant 2, non-coding RNA.	9	34	3	9	9	22	6	9	15	9	14	1.98347	6.62495	6.84932	15.7177	5.50005	7.33509	8.26495	28.0806	11.4495	6.71792	5.88697	7.22311	12.08	1.64688	0.349937	0
srna800595	ACGGCCCTGGCGGAGCGCTGAGAAGACGGTCGAACTTG	38	1	chr2	133011984	133012021	-	EXACT	refGene	NR_027020	ANKRD30BL	132905163	133015542	-	Homo sapiens ankyrin repeat domain 30B-like (ANKRD30BL), transcript variant 2, non-coding RNA.	4	48	10	4	4	16	13	14	12	11	3	6.61157	2.94442	3.04414	11.431	11.9168	7.18958	1.77106	39.6432	9.15961	8.21079	2.61643	11.236	12.2802	1.70806	0.517047	0
srna167304	AAATTAGAGTGTTCAAAGCAGGCCCG	26	1	chr2	133012946	133012970	-	CLIPPED	refGene	NR_027020	ANKRD30BL	132905163	133015542	-	Homo sapiens ankyrin repeat domain 30B-like (ANKRD30BL), transcript variant 2, non-coding RNA.	11	12	7	9	11	13	7	9	18	6	12	4.6281	8.09717	6.84932	9.2877	6.41672	7.0558	7.08424	9.9108	13.7394	4.47861	7.19519	7.22311	8.48165	1.20208	0.44855	0
srna4532894	GTTCAGCCACCCGAGATTGAGCAATAACAGGTCTGTGA	38	1	chr2	133012283	133012320	-	EXACT	refGene	NR_027020	ANKRD30BL	132905163	133015542	-	Homo sapiens ankyrin repeat domain 30B-like (ANKRD30BL), transcript variant 2, non-coding RNA.	100	19	6	6	13	7	13	7	20	3	14	3.96694	9.56938	4.56621	5.00107	11.9168	7.00407	8.26495	15.6921	15.266	2.23931	65.4108	5.61798	21.3746	3.05174	0.273386	0
srna2745019	CGGAGCGCTGAGAAGACGGTCGAACTTGACT	31	1	chr2	133011981	133012011	-	EXACT	refGene	NR_027020	ANKRD30BL	132905163	133015542	-	Homo sapiens ankyrin repeat domain 30B-like (ANKRD30BL), transcript variant 2, non-coding RNA.	5	7	6	5	9	10	12	8	7	7	9	3.96694	6.62495	3.80518	7.14439	11.0001	6.50831	5.31318	5.7813	5.3431	5.22505	3.27054	6.42055	4.98664	0.766195	0.322261	0
srna2538026	CCTGGCGGAGCGCTGAGAAGACGGTCGAACTTGACT	36	1	chr2	133011981	133012016	-	EXACT	refGene	NR_027020	ANKRD30BL	132905163	133015542	-	Homo sapiens ankyrin repeat domain 30B-like (ANKRD30BL), transcript variant 2, non-coding RNA.	13	27	15	8	3	8	9	20	20	16	10	9.91736	2.20832	6.08828	5.71551	8.25007	6.43591	5.90354	22.2993	15.266	11.943	8.5034	16.0514	12.783	1.98621	0.0930304	0
srna1017228	AGAGTGTTCAAAGCAGGCCCGAGCCGCC	28	1	chr2	133012938	133012965	-	EXACT	refGene	NR_027020	ANKRD30BL	132905163	133015542	-	Homo sapiens ankyrin repeat domain 30B-like (ANKRD30BL), transcript variant 2, non-coding RNA.	10	30	6	15	7	13	2	7	18	5	8	3.96694	5.15274	11.4155	9.2877	1.83335	6.33125	4.72283	24.777	13.7394	3.73218	6.54108	5.61798	10.7025	1.69042	0.352273	0
srna2745028	CGGAGCGCTGAGAAGACGGTCGAACTTGACTATCTAG	37	1	chr2	133011975	133012011	-	EXACT	refGene	NR_027020	ANKRD30BL	132905163	133015542	-	Homo sapiens ankyrin repeat domain 30B-like (ANKRD30BL), transcript variant 2, non-coding RNA.	18	18	16	4	4	15	4	12	10	9	9	10.5785	2.94442	3.04414	10.7166	3.6667	6.19007	5.31318	14.8662	7.63301	6.71792	11.7739	9.63082	9.26085	1.49608	0.26114	0
srna2187657	CCAACTTCTTAGAGGGACAAGTGGCGTTCAGCCACC	36	1	chr2	133012310	133012345	-	EXACT	refGene	NR_027020	ANKRD30BL	132905163	133015542	-	Homo sapiens ankyrin repeat domain 30B-like (ANKRD30BL), transcript variant 2, non-coding RNA.	26	8	11	8	12	10	1	2	7	8	10	7.27273	8.83327	6.08828	7.14439	0.916674	6.05107	5.90354	6.6072	5.3431	5.97149	17.0068	1.60514	8.16643	1.34958	0.444274	0
srna1693044	ATTGACGGAAGGGCACCACCAGGAGTGG	28	1	chr2	133012550	133012577	-	EXACT	refGene	NR_027020	ANKRD30BL	132905163	133015542	-	Homo sapiens ankyrin repeat domain 30B-like (ANKRD30BL), transcript variant 2, non-coding RNA.	2	3	8	14	5	5	7	7	9	4	10	5.28926	3.68053	10.6545	3.57219	6.41672	5.92264	5.90354	2.4777	6.8697	2.98574	1.30822	5.61798	3.90898	0.660007	0.26453	0
srna4510142	GTGTTCAAAGCAGGCCCGAGCCGCC	25	1	chr2	133012938	133012962	-	EXACT	refGene	NR_027020	ANKRD30BL	132905163	133015542	-	Homo sapiens ankyrin repeat domain 30B-like (ANKRD30BL), transcript variant 2, non-coding RNA.	5	8	3	8	13	14	2	7	9	4	3	1.98347	9.56938	6.08828	10.0021	1.83335	5.89532	1.77106	6.6072	6.8697	2.98574	3.27054	5.61798	4.30085	0.729536	0.462439	0
srna2386755	CCCTGGCGGAGCGCTGAGAAGACGGTCGAACTTGACT	37	1	chr2	133011981	133012017	-	EXACT	refGene	NR_027020	ANKRD30BL	132905163	133015542	-	Homo sapiens ankyrin repeat domain 30B-like (ANKRD30BL), transcript variant 2, non-coding RNA.	3	14	8	6	1	5	15	20	12	8	7	5.28926	0.736106	4.56621	3.57219	13.7501	5.58278	4.13248	11.5626	9.15961	5.97149	1.96232	16.0514	6.5577	1.17463	0.735321	0
srna321644	AAGACGGACCAGAGCGAAAGCATTTGCCAAGAATGTTT	38	1	chr2	133012766	133012797	-	CLIPPED	refGene	NR_027020	ANKRD30BL	132905163	133015542	-	Homo sapiens ankyrin repeat domain 30B-like (ANKRD30BL), transcript variant 2, non-coding RNA.	13	17	10	10	4	3	9	7	18	18	46	6.61157	2.94442	7.61035	2.14332	8.25007	5.51195	27.1563	14.0403	13.7394	13.4358	8.5034	5.61798	15.375	2.7894	0.0304792	0
srna428357	AAGTAAAAGTCGTAACAAGGTTTCCGTAGGTGAACCTG	38	1	chr2	133011934	133011971	-	EXACT	refGene	NR_027020	ANKRD30BL	132905163	133015542	-	Homo sapiens ankyrin repeat domain 30B-like (ANKRD30BL), transcript variant 2, non-coding RNA.	22	9	4	8	2	19	3	2	13	12	14	2.64463	1.47221	6.08828	13.5743	2.75002	5.3059	8.26495	7.4331	9.92291	8.95723	14.3904	1.60514	9.79371	1.84582	0.123389	0
srna4864084	TAGGTGAACCTGCGGAAGGATCATTA	26	1	chr2	133011920	133011945	-	EXACT	refGene	NR_027020	ANKRD30BL	132905163	133015542	-	Homo sapiens ankyrin repeat domain 30B-like (ANKRD30BL), transcript variant 2, non-coding RNA.	6	3	6	6	4	12	6	4	6	2	4	3.96694	2.94442	4.56621	8.57327	5.50005	5.11018	2.36141	2.4777	4.5798	1.49287	3.92465	3.21027	2.96729	0.580662	0.098929	0
srna758356	ACGAAAGTCGGAGGTTCGAAGACGATCAGAT	31	1	chr2	133012722	133012752	-	EXACT	refGene	NR_027020	ANKRD30BL	132905163	133015542	-	Homo sapiens ankyrin repeat domain 30B-like (ANKRD30BL), transcript variant 2, non-coding RNA.	3	10	9	11	5	4	5	6	5	7	4	5.95041	3.68053	8.37139	2.85776	4.58337	5.08869	2.36141	8.259	3.8165	5.22505	1.96232	4.81541	4.32486	0.849896	0.623618	0
srna305097	AAGAACGAAAGTCGGAGGTTCGAAGACGATC	31	1	chr2	133012726	133012756	-	EXACT	refGene	NR_027020	ANKRD30BL	132905163	133015542	-	Homo sapiens ankyrin repeat domain 30B-like (ANKRD30BL), transcript variant 2, non-coding RNA.	2	7	9	13	3	3	5	7	8	16	4	5.95041	2.20832	9.89346	2.14332	4.58337	4.95577	2.36141	5.7813	6.1064	11.943	1.30822	5.61798	5.50006	1.10983	0.822951	0
srna5607915	TGGCGGAGCGCTGAGAAGACGGTCGAACTTGACTA	35	1	chr2	133011980	133012014	-	EXACT	refGene	NR_027020	ANKRD30BL	132905163	133015542	-	Homo sapiens ankyrin repeat domain 30B-like (ANKRD30BL), transcript variant 2, non-coding RNA.	5	19	7	2	5	4	13	6	12	1	2	4.6281	3.68053	1.52207	2.85776	11.9168	4.92104	1.18071	15.6921	9.15961	0.746436	3.27054	4.81541	6.00988	1.22126	0.757059	0
srna1453145	ATCAAGAACGAAAGTCGGAGGTTCGAAGACGA	32	1	chr2	133012728	133012759	-	EXACT	refGene	NR_027020	ANKRD30BL	132905163	133015542	-	Homo sapiens ankyrin repeat domain 30B-like (ANKRD30BL), transcript variant 2, non-coding RNA.	4	17	9	9	4	2	8	5	17	15	9	5.95041	2.94442	6.84932	1.42888	7.33339	4.90128	5.31318	14.0403	12.9761	11.1965	2.61643	4.01284	9.22851	1.88288	0.136588	0
srna5607921	TGGCGGAGCGCTGAGAAGACGGTCGAACTTGACTATCT	38	1	chr2	133011977	133012014	-	EXACT	refGene	NR_027020	ANKRD30BL	132905163	133015542	-	Homo sapiens ankyrin repeat domain 30B-like (ANKRD30BL), transcript variant 2, non-coding RNA.	9	10	9	5	5	10	4	6	3	22	6	5.95041	3.68053	3.80518	7.14439	3.6667	4.84944	3.54212	8.259	2.2899	16.4216	5.88697	4.81541	7.27992	1.50119	0.396563	0
srna2538027	CCTGGCGGAGCGCTGAGAAGACGGTCGAACTTGACTA	37	1	chr2	133011980	133012016	-	EXACT	refGene	NR_027020	ANKRD30BL	132905163	133015542	-	Homo sapiens ankyrin repeat domain 30B-like (ANKRD30BL), transcript variant 2, non-coding RNA.	16	5	11	2	3	8	8	3	3	4	4	7.27273	2.20832	1.52207	5.71551	7.33339	4.8104	2.36141	4.1295	2.2899	2.98574	10.4657	2.4077	4.44646	0.924342	0.858837	0
srna4331403	GTAACAAGGTTTCCGTAGGTGAACCTGCGGAAGGATCAT	39	1	chr2	133011922	133011960	-	EXACT	refGene	NR_027020	ANKRD30BL	132905163	133015542	-	Homo sapiens ankyrin repeat domain 30B-like (ANKRD30BL), transcript variant 2, non-coding RNA.	6	15	4	9		13	5	2	7	3		2.64463	0	6.84932	9.2877	4.58337	4.673	0	12.3885	5.3431	2.23931	3.92465	1.60514	4.77911	1.02271	0.969082	0
srna2386754	CCCTGGCGGAGCGCTGAGAAGACGGTCGAACTTGAC	36	1	chr2	133011982	133012017	-	EXACT	refGene	NR_027020	ANKRD30BL	132905163	133015542	-	Homo sapiens ankyrin repeat domain 30B-like (ANKRD30BL), transcript variant 2, non-coding RNA.	3	11	11	4	5	5	5	13	10	3	8	7.27273	3.68053	3.04414	3.57219	4.58337	4.43059	4.72283	9.0849	7.63301	2.23931	1.96232	10.4334	5.12847	1.15751	0.679479	0
srna124542	AAAGGAATTGACGGAAGGGCACCACCAGGAGTGGAGCC	38	1	chr2	133012546	133012583	-	EXACT	refGene	NR_027020	ANKRD30BL	132905163	133015542	-	Homo sapiens ankyrin repeat domain 30B-like (ANKRD30BL), transcript variant 2, non-coding RNA.	14	14	6	10	4	7	2	5	11	7	12	3.96694	2.94442	7.61035	5.00107	1.83335	4.27123	7.08424	11.5626	8.39631	5.22505	9.15751	4.01284	8.28514	1.93976	0.0241622	0
srna3872655	GCGGAGCGCTGAGAAGACGGTCGAACTTGACT	32	1	chr2	133011981	133012012	-	EXACT	refGene	NR_027020	ANKRD30BL	132905163	133015542	-	Homo sapiens ankyrin repeat domain 30B-like (ANKRD30BL), transcript variant 2, non-coding RNA.	2	9	2	2	2	4	15	6	7	5	2	1.32231	1.47221	1.52207	2.85776	13.7501	4.18489	1.18071	7.4331	5.3431	3.73218	1.30822	4.81541	3.79946	0.907899	0.8908	0
srna138553	AAAGTCGTAACAAGGTTTCCGTAGGTGAACCTG	33	1	chr2	133011934	133011966	-	EXACT	refGene	NR_027020	ANKRD30BL	132905163	133015542	-	Homo sapiens ankyrin repeat domain 30B-like (ANKRD30BL), transcript variant 2, non-coding RNA.	11	3	1	2	4	13	6	1	6	10	11	0.661157	2.94442	1.52207	9.2877	5.50005	3.98308	6.49389	2.4777	4.5798	7.46436	7.19519	0.802568	5.64219	1.41654	0.394116	0
srna375185	AAGCTGAAACTTAAAGGAATTGACGGAAGGGCACCACC	38	1	chr2	133012558	133012595	-	EXACT	refGene	NR_027020	ANKRD30BL	132905163	133015542	-	Homo sapiens ankyrin repeat domain 30B-like (ANKRD30BL), transcript variant 2, non-coding RNA.	8	14	2	10	1	10	3	3	7	7	9	1.32231	0.736106	7.61035	7.14439	2.75002	3.91264	5.31318	11.5626	5.3431	5.22505	5.23286	2.4077	6.53536	1.67032	0.210246	0
srna4117156	GGCGGAGCGCTGAGAAGACGGTCGAACTTGAC	32	1	chr2	133011982	133012013	-	EXACT	refGene	NR_027020	ANKRD30BL	132905163	133015542	-	Homo sapiens ankyrin repeat domain 30B-like (ANKRD30BL), transcript variant 2, non-coding RNA.	4	9	7	2	1	3	11	12	4	7	3	4.6281	0.736106	1.52207	2.14332	10.0834	3.8226	1.77106	7.4331	3.0532	5.22505	2.61643	9.63082	4.01977	1.05158	0.92371	0
srna2764410	CGGCCCTGGCGGAGCGCTGAGAAGACGGTCGAACTTGA	38	1	chr2	133011983	133012018	-	CLIPPED	refGene	NR_027020	ANKRD30BL	132905163	133015542	-	Homo sapiens ankyrin repeat domain 30B-like (ANKRD30BL), transcript variant 2, non-coding RNA.	1	29	6	4	1	8	6	12	15	10	2	3.96694	0.736106	3.04414	5.71551	5.50005	3.79255	1.18071	23.9511	11.4495	7.46436	0.654108	9.63082	8.93996	2.35724	0.297537	0
srna3311704	GAACGAAAGTCGGAGGTTCGAAGACGATCAGAT	33	1	chr2	133012722	133012754	-	EXACT	refGene	NR_027020	ANKRD30BL	132905163	133015542	-	Homo sapiens ankyrin repeat domain 30B-like (ANKRD30BL), transcript variant 2, non-coding RNA.	4	4	13	4	3	4	2	4	5	5	3	8.59504	2.20832	3.04414	2.85776	1.83335	3.70772	1.77106	3.3036	3.8165	3.73218	2.61643	3.21027	3.04795	0.822056	0.6342	0
srna548782	AATTGACGGAAGGGCACCACCAGGAG	26	1	chr2	133012553	133012578	-	EXACT	refGene	NR_027020	ANKRD30BL	132905163	133015542	-	Homo sapiens ankyrin repeat domain 30B-like (ANKRD30BL), transcript variant 2, non-coding RNA.	2	10	7	7	1	2	7	8	12	4	7	4.6281	0.736106	5.32725	1.42888	6.41672	3.70741	4.13248	8.259	9.15961	2.98574	1.30822	6.42055	5.16901	1.39424	0.462336	0
srna436956	AAGTCGTAACAAGGTTTCCGTAGGTGAACCTGCGGA	36	1	chr2	133011930	133011965	-	EXACT	refGene	NR_027020	ANKRD30BL	132905163	133015542	-	Homo sapiens ankyrin repeat domain 30B-like (ANKRD30BL), transcript variant 2, non-coding RNA.	9	8	3	4	1	11	5	3	6	4	6	1.98347	0.736106	3.04414	7.85883	4.58337	3.64118	3.54212	6.6072	4.5798	2.98574	5.88697	2.4077	4.72037	1.29638	0.470832	0
srna3419300	GACGGTCGAACTTGACTATCTAGAGGAAGTAAAAGTCGT	39	1	chr2	133011959	133011997	-	EXACT	refGene	NR_027020	ANKRD30BL	132905163	133015542	-	Homo sapiens ankyrin repeat domain 30B-like (ANKRD30BL), transcript variant 2, non-coding RNA.	6	1	10		7	5	3	1		1	1	6.61157	5.15274	0	3.57219	2.75002	3.61731	0.590354	0.8259	0	0.746436	3.92465	0.802568	1.21747	0.336567	0.113596	0
srna1156467	AGGAAGTAAAAGTCGTAACAAGGTTTCCGTAGGTGAACC	39	1	chr2	133011936	133011974	-	EXACT	refGene	NR_027020	ANKRD30BL	132905163	133015542	-	Homo sapiens ankyrin repeat domain 30B-like (ANKRD30BL), transcript variant 2, non-coding RNA.	10	8	6	6		12	1	6	1	4	4	3.96694	0	4.56621	8.57327	0.916674	3.60462	2.36141	6.6072	0.763301	2.98574	6.54108	4.81541	3.85175	1.06856	0.900673	0
srna4612649	TAAAAGTCGTAACAAGGTTTCCGTAGGTGAACCTG	35	1	chr2	133011934	133011968	-	EXACT	refGene	NR_027020	ANKRD30BL	132905163	133015542	-	Homo sapiens ankyrin repeat domain 30B-like (ANKRD30BL), transcript variant 2, non-coding RNA.	19	7	1	6	2	12	3	2	16	6	21	0.661157	1.47221	4.56621	8.57327	2.75002	3.60457	12.3974	5.7813	12.2128	4.47861	12.428	1.60514	9.45964	2.62434	0.0339914	0
srna1328220	AGTCGTAACAAGGTTTCCGTAGGTGAACCTGCGGAAGGA	39	1	chr2	133011926	133011964	-	EXACT	refGene	NR_027020	ANKRD30BL	132905163	133015542	-	Homo sapiens ankyrin repeat domain 30B-like (ANKRD30BL), transcript variant 2, non-coding RNA.	4	17	5	4	2	4	8	13	16	3	5	3.30579	1.47221	3.04414	2.85776	7.33339	3.60266	2.95177	14.0403	12.2128	2.23931	2.61643	10.4334	6.81212	1.89086	0.298791	0
srna248341	AACGAAAGTCGGAGGTTCGAAGACGATC	28	1	chr2	133012726	133012753	-	EXACT	refGene	NR_027020	ANKRD30BL	132905163	133015542	-	Homo sapiens ankyrin repeat domain 30B-like (ANKRD30BL), transcript variant 2, non-coding RNA.	3	3	6	3	8	4	3	9	12	14	2	3.96694	5.88885	2.28311	2.85776	2.75002	3.54933	1.18071	2.4777	9.15961	10.4501	1.96232	7.22311	5.04609	1.4217	0.502565	0
srna924409	AGAACGAAAGTCGGAGGTTCGAAGACGATCAGATACCG	38	1	chr2	133012718	133012755	-	EXACT	refGene	NR_027020	ANKRD30BL	132905163	133015542	-	Homo sapiens ankyrin repeat domain 30B-like (ANKRD30BL), transcript variant 2, non-coding RNA.	6	15	5	10		4	4	4	17	7	13	3.30579	0	7.61035	2.85776	3.6667	3.48812	7.6746	12.3885	12.9761	5.22505	3.92465	3.21027	8.43778	2.41901	0.0598135	0
srna3509753	GAGGAAGTAAAAGTCGTAACAAGGTTTCCGTAGG	34	1	chr2	133011942	133011975	-	EXACT	refGene	NR_027020	ANKRD30BL	132905163	133015542	-	Homo sapiens ankyrin repeat domain 30B-like (ANKRD30BL), transcript variant 2, non-coding RNA.	20	12	5	3	6	9	1		3	4	8	3.30579	4.41664	2.28311	6.42995	0.916674	3.47043	4.72283	9.9108	2.2899	2.98574	13.0822	0	6.59829	1.90129	0.226523	0
srna924393	AGAACGAAAGTCGGAGGTTCGAAG	24	1	chr2	133012732	133012755	-	EXACT	refGene	NR_027020	ANKRD30BL	132905163	133015542	-	Homo sapiens ankyrin repeat domain 30B-like (ANKRD30BL), transcript variant 2, non-coding RNA.	4	4	5	6	3	6	3	7	13	3	6	3.30579	2.20832	4.56621	4.28663	2.75002	3.42339	3.54212	3.3036	9.92291	2.23931	2.61643	5.61798	4.32487	1.26333	0.572092	0
srna5610124	TGGCGTTCAGCCACCCGAGATTGAGCAATAACAGGTCTG	39	1	chr2	133012286	133012324	-	EXACT	refGene	NR_027020	ANKRD30BL	132905163	133015542	-	Homo sapiens ankyrin repeat domain 30B-like (ANKRD30BL), transcript variant 2, non-coding RNA.	31	14	6	5		4	7	3	13	5	26	3.96694	0	3.80518	2.85776	6.41672	3.40932	15.3492	11.5626	9.92291	3.73218	20.2773	2.4077	12.1688	3.56929	0.0303584	0
srna5235072	TCTATTTTGTTGGTTTTCGGAACT	24	1	chr2	133012875	133012898	-	EXACT	refGene	NR_027020	ANKRD30BL	132905163	133015542	-	Homo sapiens ankyrin repeat domain 30B-like (ANKRD30BL), transcript variant 2, non-coding RNA.	12	9	5	3	1	2	10	8	4	1		3.30579	0.736106	2.28311	1.42888	9.16674	3.38412	0	7.4331	3.0532	0.746436	7.84929	6.42055	3.81641	1.12774	0.851123	0
srna4117157	GGCGGAGCGCTGAGAAGACGGTCGAACTTGACT	33	1	chr2	133011981	133012013	-	EXACT	refGene	NR_027020	ANKRD30BL	132905163	133015542	-	Homo sapiens ankyrin repeat domain 30B-like (ANKRD30BL), transcript variant 2, non-coding RNA.	2	15	8	4	1	1	7	7	3	4	2	5.28926	0.736106	3.04414	0.714439	6.41672	3.24013	1.18071	12.3885	2.2899	2.98574	1.30822	5.61798	4.03061	1.24397	0.754018	0
srna3311700	GAACGAAAGTCGGAGGTTCGAAGACGATC	29	1	chr2	133012726	133012754	-	EXACT	refGene	NR_027020	ANKRD30BL	132905163	133015542	-	Homo sapiens ankyrin repeat domain 30B-like (ANKRD30BL), transcript variant 2, non-coding RNA.	4	4	7	12		2	1	8	6	11	5	4.6281	0	9.13242	1.42888	0.916674	3.22121	2.95177	3.3036	4.5798	8.21079	2.61643	6.42055	4.33248	1.34498	0.589385	0
srna924400	AGAACGAAAGTCGGAGGTTCGAAGACGATC	30	1	chr2	133012726	133012755	-	EXACT	refGene	NR_027020	ANKRD30BL	132905163	133015542	-	Homo sapiens ankyrin repeat domain 30B-like (ANKRD30BL), transcript variant 2, non-coding RNA.	9	3	8	7	3	2	2	8	12	10	6	5.28926	2.20832	5.32725	1.42888	1.83335	3.21741	3.54212	2.4777	9.15961	7.46436	5.88697	6.42055	5.70615	1.77352	0.140128	0
srna3127500	CTGGCGGAGCGCTGAGAAGACGGTCGAACTTGACTAT	37	1	chr2	133011979	133012015	-	EXACT	refGene	NR_027020	ANKRD30BL	132905163	133015542	-	Homo sapiens ankyrin repeat domain 30B-like (ANKRD30BL), transcript variant 2, non-coding RNA.	7	8	11	3	4	1	3	2	9	11	4	7.27273	2.94442	2.28311	0.714439	2.75002	3.19294	2.36141	6.6072	6.8697	8.21079	4.57875	1.60514	5.72557	1.7932	0.129122	0
srna795757	ACGGACCAGAGCGAAAGCATTTGCCAAGAATGTTTTCAT	39	1	chr2	133012762	133012797	-	CLIPPED	refGene	NR_027020	ANKRD30BL	132905163	133015542	-	Homo sapiens ankyrin repeat domain 30B-like (ANKRD30BL), transcript variant 2, non-coding RNA.	16	21	5	4	1	2	8	10	63	28	39	3.30579	0.736106	3.04414	1.42888	7.33339	3.16966	23.0238	17.3439	48.0879	20.9002	10.4657	8.02568	23.9643	7.56053	0.0301224	0
srna4101236	GGCCCTGGCGGAGCGCTGAGAAGACGGTCGAACTTGA	37	1	chr2	133011983	133012018	-	CLIPPED	refGene	NR_027020	ANKRD30BL	132905163	133015542	-	Homo sapiens ankyrin repeat domain 30B-like (ANKRD30BL), transcript variant 2, non-coding RNA.	1	22	8	4	1	4	4	15	8	3	2	5.28926	0.736106	3.04414	2.85776	3.6667	3.11879	1.18071	18.1698	6.1064	2.23931	0.654108	12.0385	5.67007	1.81803	0.484926	0
srna3311708	GAACGAAAGTCGGAGGTTCGAAGACGATCAGATACCG	37	1	chr2	133012718	133012754	-	EXACT	refGene	NR_027020	ANKRD30BL	132905163	133015542	-	Homo sapiens ankyrin repeat domain 30B-like (ANKRD30BL), transcript variant 2, non-coding RNA.	2	5	3	5	1	10	2	1	9	2	8	1.98347	0.736106	3.80518	7.14439	1.83335	3.1005	4.72283	4.1295	6.8697	1.49287	1.30822	0.802568	3.70462	1.19485	0.704348	0
srna5607908	TGGCGGAGCGCTGAGAAGACGGTCGAACTTGA	32	1	chr2	133011983	133012014	-	EXACT	refGene	NR_027020	ANKRD30BL	132905163	133015542	-	Homo sapiens ankyrin repeat domain 30B-like (ANKRD30BL), transcript variant 2, non-coding RNA.	5	11	3	6	4	3	4	3	3	5		1.98347	2.94442	4.56621	2.14332	3.6667	3.06082	0	9.0849	2.2899	3.73218	3.27054	2.4077	3.6755	1.20082	0.712695	0
srna3419299	GACGGTCGAACTTGACTATCTAGAGGAAGTAAAAGTCG	38	1	chr2	133011960	133011997	-	EXACT	refGene	NR_027020	ANKRD30BL	132905163	133015542	-	Homo sapiens ankyrin repeat domain 30B-like (ANKRD30BL), transcript variant 2, non-coding RNA.	8	7	6	2	2	10	1	1	2	4	7	3.96694	1.47221	1.52207	7.14439	0.916674	3.00446	4.13248	5.7813	1.5266	2.98574	5.23286	0.802568	3.9318	1.30865	0.527053	0
srna969693	AGACGGACCAGAGCGAAAGCATTTGCCAAGAATGTT	36	1	chr2	133012767	133012794	-	CLIPPED	refGene	NR_027020	ANKRD30BL	132905163	133015542	-	Homo sapiens ankyrin repeat domain 30B-like (ANKRD30BL), transcript variant 2, non-coding RNA.	14	17	3	7	1	2	6	6	37	23	40	1.98347	0.736106	5.32725	1.42888	5.50005	2.99515	23.6141	14.0403	28.2421	17.168	9.15751	4.81541	18.4444	6.1581	0.0083434	0
srna3378204	GACACGGACAGGATTGACAGATTGATAGCTCTTTCTCGA	39	1	chr2	133012464	133012502	-	EXACT	refGene	NR_027020	ANKRD30BL	132905163	133015542	-	Homo sapiens ankyrin repeat domain 30B-like (ANKRD30BL), transcript variant 2, non-coding RNA.	3	15	8	4	1	3	4	18	31	7	23	5.28926	0.736106	3.04414	2.14332	3.6667	2.9759	13.5781	12.3885	23.6623	5.22505	1.96232	14.4462	11.3633	3.81843	0.0891408	0
srna3127498	CTGGCGGAGCGCTGAGAAGACGGTCGAACTTGACTA	36	1	chr2	133011980	133012015	-	EXACT	refGene	NR_027020	ANKRD30BL	132905163	133015542	-	Homo sapiens ankyrin repeat domain 30B-like (ANKRD30BL), transcript variant 2, non-coding RNA.	12	16	5	2	2	3	7	8	6	5	5	3.30579	1.47221	1.52207	2.14332	6.41672	2.97202	2.95177	13.2144	4.5798	3.73218	7.84929	6.42055	6.46549	2.17545	0.148149	0
srna539604	AATTAGAGTGTTCAAAGCAGGCCCGAGCCGCC	32	1	chr2	133012938	133012969	-	EXACT	refGene	NR_027020	ANKRD30BL	132905163	133015542	-	Homo sapiens ankyrin repeat domain 30B-like (ANKRD30BL), transcript variant 2, non-coding RNA.	4	15	4	4	5	3	3	1	4	5	2	2.64463	3.68053	3.04414	2.14332	2.75002	2.85253	1.18071	12.3885	3.0532	3.73218	2.61643	0.802568	4.5942	1.61057	0.433431	0
srna4789829	TAGAGTGTTCAAAGCAGGCCCGAGCCGCC	29	1	chr2	133012938	133012966	-	EXACT	refGene	NR_027020	ANKRD30BL	132905163	133015542	-	Homo sapiens ankyrin repeat domain 30B-like (ANKRD30BL), transcript variant 2, non-coding RNA.	5	32	1	11	1	5	1	11	17	6	4	0.661157	0.736106	8.37139	3.57219	0.916674	2.8515	2.36141	26.4288	12.9761	4.47861	3.27054	8.82825	9.9031	3.47294	0.201953	0
srna1289965	AGGTTTCCGTAGGTGAACCTGCGGAAGGATCATTAA	36	1	chr2	133011919	133011952	-	CLIPPED	refGene	NR_027020	ANKRD30BL	132905163	133015542	-	Homo sapiens ankyrin repeat domain 30B-like (ANKRD30BL), transcript variant 2, non-coding RNA.	9	15	2	5	1	9	2	7	6	1	1	1.32231	0.736106	3.80518	6.42995	1.83335	2.82538	0.590354	12.3885	4.5798	0.746436	5.88697	5.61798	4.83841	1.71248	0.433735	0
srna428014	AAGGTTTCCGTAGGTGAACCTGCGGAAGGATCATTAA	37	1	chr2	133011919	133011955	-	EXACT	refGene	NR_027020	ANKRD30BL	132905163	133015542	-	Homo sapiens ankyrin repeat domain 30B-like (ANKRD30BL), transcript variant 2, non-coding RNA.	13	7	6	7		5	1	3	7	7	4	3.96694	0	5.32725	3.57219	0.916674	2.75661	2.36141	5.7813	5.3431	5.22505	8.5034	2.4077	5.44285	1.97447	0.0897753	0
srna2764409	CGGCCCTGGCGGAGCGCTGAGAAGACGGTCGAACTTG	37	1	chr2	133011984	133012018	-	CLIPPED	refGene	NR_027020	ANKRD30BL	132905163	133015542	-	Homo sapiens ankyrin repeat domain 30B-like (ANKRD30BL), transcript variant 2, non-coding RNA.	3	20	6	3	1	3	5	3	9	8	5	3.96694	0.736106	2.28311	2.14332	4.58337	2.74257	2.95177	16.518	6.8697	5.97149	1.96232	2.4077	6.85466	2.49936	0.189908	0
srna1815695	CAAGGTTTCCGTAGGTGAACCTGCGGAAGGATCATTAA	38	1	chr2	133011919	133011956	-	EXACT	refGene	NR_027020	ANKRD30BL	132905163	133015542	-	Homo sapiens ankyrin repeat domain 30B-like (ANKRD30BL), transcript variant 2, non-coding RNA.	10	8	3	5		8	2	5	4	8	4	1.98347	0	3.80518	5.71551	1.83335	2.6675	2.36141	6.6072	3.0532	5.97149	6.54108	4.01284	4.90688	1.8395	0.131334	0
srna878061	ACTTAAAGGAATTGACGGAAGGGCACCACCAGGAG	35	1	chr2	133012553	133012587	-	EXACT	refGene	NR_027020	ANKRD30BL	132905163	133015542	-	Homo sapiens ankyrin repeat domain 30B-like (ANKRD30BL), transcript variant 2, non-coding RNA.	1	2	1	7	1	4	4		3	4	12	0.661157	0.736106	5.32725	2.85776	3.6667	2.64979	7.08424	1.6518	2.2899	2.98574	0.654108	0	2.93316	1.10694	0.847066	0
srna167311	AAATTAGAGTGTTCAAAGCAGGCCCGAGCCGCC	33	1	chr2	133012938	133012970	-	EXACT	refGene	NR_027020	ANKRD30BL	132905163	133015542	-	Homo sapiens ankyrin repeat domain 30B-like (ANKRD30BL), transcript variant 2, non-coding RNA.	9	16	1	9	1	7		1	7	3	2	0.661157	0.736106	6.84932	5.00107	0	2.64953	1.18071	13.2144	5.3431	2.23931	5.88697	0.802568	5.5729	2.10335	0.284244	0
srna3127502	CTGGCGGAGCGCTGAGAAGACGGTCGAACTTGACTATCT	39	1	chr2	133011977	133012015	-	EXACT	refGene	NR_027020	ANKRD30BL	132905163	133015542	-	Homo sapiens ankyrin repeat domain 30B-like (ANKRD30BL), transcript variant 2, non-coding RNA.	6	6	3	2	3	6	3	6	5	23	3	1.98347	2.20832	1.52207	4.28663	2.75002	2.5501	1.77106	4.9554	3.8165	17.168	3.92465	4.81541	6.32713	2.48113	0.244906	0
srna5457124	TGCAAAGCTGAAACTTAAAGGAATTGACGGAAGGGCACC	39	1	chr2	133012561	133012599	-	EXACT	refGene	NR_027020	ANKRD30BL	132905163	133015542	-	Homo sapiens ankyrin repeat domain 30B-like (ANKRD30BL), transcript variant 2, non-coding RNA.	3	9	4	5	2	4	2	6	12	2	12	2.64463	1.47221	3.80518	2.85776	1.83335	2.52262	7.08424	7.4331	9.15961	1.49287	1.96232	4.81541	5.42643	2.15111	0.135955	0
srna3347999	GAAGTAAAAGTCGTAACAAGGTTTCCGTAGGTGAACC	37	1	chr2	133011936	133011972	-	EXACT	refGene	NR_027020	ANKRD30BL	132905163	133015542	-	Homo sapiens ankyrin repeat domain 30B-like (ANKRD30BL), transcript variant 2, non-coding RNA.	12	8	2	1	1	11	2	2	4	4		1.32231	0.736106	0.761035	7.85883	1.83335	2.50233	0	6.6072	3.0532	2.98574	7.84929	1.60514	4.09909	1.63811	0.436973	0
srna3908574	GCGTTCAGCCACCCGAGATTGAGCAATAACAGGTCTGT	38	1	chr2	133012285	133012322	-	EXACT	refGene	NR_027020	ANKRD30BL	132905163	133015542	-	Homo sapiens ankyrin repeat domain 30B-like (ANKRD30BL), transcript variant 2, non-coding RNA.	1	8	5	4		7	1	3	11	12	16	3.30579	0	3.04414	5.00107	0.916674	2.45353	9.44566	6.6072	8.39631	8.95723	0.654108	2.4077	6.8121	2.77644	0.0543177	0
srna4566210	GTTGGTTTTCGGAACTGAGGCCATGATTAAGAGGGA	36	1	chr2	133012855	133012890	-	EXACT	refGene	NR_027020	ANKRD30BL	132905163	133015542	-	Homo sapiens ankyrin repeat domain 30B-like (ANKRD30BL), transcript variant 2, non-coding RNA.	3	5	4	4	1	3	4	3	15	6	13	2.64463	0.736106	3.04414	2.14332	3.6667	2.44698	7.6746	4.1295	11.4495	4.47861	1.96232	2.4077	5.93891	2.42704	0.102257	0
srna3559197	GAGTGTTCAAAGCAGGCCCGAGCCGCC	27	1	chr2	133012938	133012964	-	EXACT	refGene	NR_027020	ANKRD30BL	132905163	133015542	-	Homo sapiens ankyrin repeat domain 30B-like (ANKRD30BL), transcript variant 2, non-coding RNA.	3	17		7	1	6	2	4	10	1	2	0	0.736106	5.32725	4.28663	1.83335	2.43667	1.18071	14.0403	7.63301	0.746436	1.96232	3.21027	5.11256	2.09818	0.373503	0
srna305106	AAGAACGAAAGTCGGAGGTTCGAAGACGATCAGATACCG	39	1	chr2	133012718	133012756	-	EXACT	refGene	NR_027020	ANKRD30BL	132905163	133015542	-	Homo sapiens ankyrin repeat domain 30B-like (ANKRD30BL), transcript variant 2, non-coding RNA.	5	10	2	3	4	3	3	4	9	7	8	1.32231	2.94442	2.28311	2.14332	2.75002	2.28864	4.72283	8.259	6.8697	5.22505	3.27054	3.21027	5.66943	2.47721	0.014649	0
srna1132620	AGCTGAAACTTAAAGGAATTGACGGAAGGGCACCACC	37	1	chr2	133012558	133012594	-	EXACT	refGene	NR_027020	ANKRD30BL	132905163	133015542	-	Homo sapiens ankyrin repeat domain 30B-like (ANKRD30BL), transcript variant 2, non-coding RNA.	7	8	4	4		4	3	7	10	7	9	2.64463	0	3.04414	2.85776	2.75002	2.25931	5.31318	6.6072	7.63301	5.22505	4.57875	5.61798	5.87144	2.59878	0.00183915	0
srna3647021	GCAAGACGGACCAGAGCGAAAGCATTTGCCAAGAATGTT	39	1	chr2	133012767	133012796	-	CLIPPED	refGene	NR_027020	ANKRD30BL	132905163	133015542	-	Homo sapiens ankyrin repeat domain 30B-like (ANKRD30BL), transcript variant 2, non-coding RNA.	8	19	4	4	1	4	2	6	24	16	28	2.64463	0.736106	3.04414	2.85776	1.83335	2.2232	16.5299	15.6921	18.3192	11.943	5.23286	4.81541	13.5434	6.09187	0.0073917	0
srna3737808	GCCAAGAATGTTTTCATTAATCAAGAACGAAAGTCGG	37	1	chr2	133012742	133012778	-	EXACT	refGene	NR_027020	ANKRD30BL	132905163	133015542	-	Homo sapiens ankyrin repeat domain 30B-like (ANKRD30BL), transcript variant 2, non-coding RNA.	6	6	6	6		1	2	2	14	5	26	3.96694	0	4.56621	0.714439	1.83335	2.21619	15.3492	4.9554	10.6862	3.73218	3.92465	1.60514	7.72953	3.48776	0.0730448	0
srna138555	AAAGTCGTAACAAGGTTTCCGTAGGTGAACCTGCGGA	37	1	chr2	133011930	133011966	-	EXACT	refGene	NR_027020	ANKRD30BL	132905163	133015542	-	Homo sapiens ankyrin repeat domain 30B-like (ANKRD30BL), transcript variant 2, non-coding RNA.	9	2	1	2		11	1	3	5	6	7	0.661157	0	1.52207	7.85883	0.916674	2.19175	4.13248	1.6518	3.8165	4.47861	5.88697	2.4077	3.99327	1.82196	0.302989	0
srna3046251	CTGAAACTTAAAGGAATTGACGGAAGGGCACCACC	35	1	chr2	133012558	133012592	-	EXACT	refGene	NR_027020	ANKRD30BL	132905163	133015542	-	Homo sapiens ankyrin repeat domain 30B-like (ANKRD30BL), transcript variant 2, non-coding RNA.	4	6	4	2	2	2	4	2	7	3	10	2.64463	1.47221	1.52207	1.42888	3.6667	2.1469	5.90354	4.9554	5.3431	2.23931	2.61643	1.60514	4.21156	1.96169	0.05154	0
srna2538028	CCTGGCGGAGCGCTGAGAAGACGGTCGAACTTGACTAT	38	1	chr2	133011979	133012016	-	EXACT	refGene	NR_027020	ANKRD30BL	132905163	133015542	-	Homo sapiens ankyrin repeat domain 30B-like (ANKRD30BL), transcript variant 2, non-coding RNA.	3	9	2	1	4	5	2	2	2	10	2	1.32231	2.94442	0.761035	3.57219	1.83335	2.08666	1.18071	7.4331	1.5266	7.46436	1.96232	1.60514	3.91342	1.87544	0.288279	0
srna4331402	GTAACAAGGTTTCCGTAGGTGAACCTGCGGAAGGATCA	38	1	chr2	133011923	133011960	-	EXACT	refGene	NR_027020	ANKRD30BL	132905163	133015542	-	Homo sapiens ankyrin repeat domain 30B-like (ANKRD30BL), transcript variant 2, non-coding RNA.	3	3	1	2		10	1	1	2	3	5	0.661157	0	1.52207	7.14439	0.916674	2.04886	2.95177	2.4777	1.5266	2.23931	1.96232	0.802568	2.23154	1.08916	0.896131	0
srna3852638	GCGCAAGACGGACCAGAGCGAAAGCATTTGCCAAGAATG	39	1	chr2	133012769	133012796	-	CLIPPED	refGene	NR_027020	ANKRD30BL	132905163	133015542	-	Homo sapiens ankyrin repeat domain 30B-like (ANKRD30BL), transcript variant 2, non-coding RNA.	6	4	3	5	2	1	2	3	12	13	10	1.98347	1.47221	3.80518	0.714439	1.83335	1.96173	5.90354	3.3036	9.15961	9.70366	3.92465	2.4077	6.39901	3.26192	0.0241871	0
srna293123	AACTTCTTAGAGGGACAAGTGGCGTTCAGCCACC	34	1	chr2	133012310	133012343	-	EXACT	refGene	NR_027020	ANKRD30BL	132905163	133015542	-	Homo sapiens ankyrin repeat domain 30B-like (ANKRD30BL), transcript variant 2, non-coding RNA.	3	4	10	2		1	1	1		2		6.61157	0	1.52207	0.714439	0.916674	1.95295	0	3.3036	0	1.49287	1.96232	0.802568	1.35176	0.692162	0.670359	0
srna288436	AACTTAAAGGAATTGACGGAAGGGCACCACCAGGAG	36	1	chr2	133012553	133012588	-	EXACT	refGene	NR_027020	ANKRD30BL	132905163	133015542	-	Homo sapiens ankyrin repeat domain 30B-like (ANKRD30BL), transcript variant 2, non-coding RNA.	9	1	1	4	1	6	1	7	8	14	10	0.661157	0.736106	3.04414	4.28663	0.916674	1.92894	5.90354	0.8259	6.1064	10.4501	5.88697	5.61798	5.83458	3.02476	0.0622242	0
srna2386756	CCCTGGCGGAGCGCTGAGAAGACGGTCGAACTTGACTA	38	1	chr2	133011980	133012017	-	EXACT	refGene	NR_027020	ANKRD30BL	132905163	133015542	-	Homo sapiens ankyrin repeat domain 30B-like (ANKRD30BL), transcript variant 2, non-coding RNA.	8	14	3		3	5	2	8	4	1	6	1.98347	2.20832	0	3.57219	1.83335	1.91947	3.54212	11.5626	3.0532	0.746436	5.23286	6.42055	4.82745	2.51499	0.192471	0
srna3908573	GCGTTCAGCCACCCGAGATTGAGCAATAACAGGTCTG	37	1	chr2	133012286	133012322	-	EXACT	refGene	NR_027020	ANKRD30BL	132905163	133015542	-	Homo sapiens ankyrin repeat domain 30B-like (ANKRD30BL), transcript variant 2, non-coding RNA.	17	12	2	3	1	2	4	8	9	4	12	1.32231	0.736106	2.28311	1.42888	3.6667	1.88742	7.08424	9.9108	6.8697	2.98574	11.1198	6.42055	7.59407	4.02352	0.0124626	0
srna5235073	TCTATTTTGTTGGTTTTCGGAACTG	25	1	chr2	133012874	133012898	-	EXACT	refGene	NR_027020	ANKRD30BL	132905163	133015542	-	Homo sapiens ankyrin repeat domain 30B-like (ANKRD30BL), transcript variant 2, non-coding RNA.	10	2	4	1		2	5	2	2	1		2.64463	0	0.761035	1.42888	4.58337	1.88358	0	1.6518	1.5266	0.746436	6.54108	1.60514	2.09318	1.11128	0.885385	0
srna1767283	CAAAGCTGAAACTTAAAGGAATTGACGGAAGGGCACC	37	1	chr2	133012561	133012597	-	EXACT	refGene	NR_027020	ANKRD30BL	132905163	133015542	-	Homo sapiens ankyrin repeat domain 30B-like (ANKRD30BL), transcript variant 2, non-coding RNA.		3	2	1	3	3	3	4	5	5	13	1.32231	2.20832	0.761035	2.14332	2.75002	1.837	7.6746	2.4777	3.8165	3.73218	0	3.21027	3.5402	1.92716	0.248549	0
srna5947405	TTCGGAACTGAGGCCATGATTAAG	24	1	chr2	133012860	133012883	-	EXACT	refGene	NR_027020	ANKRD30BL	132905163	133015542	-	Homo sapiens ankyrin repeat domain 30B-like (ANKRD30BL), transcript variant 2, non-coding RNA.	3	18	3	4	2	2	1	6	15	12	12	1.98347	1.47221	3.04414	1.42888	0.916674	1.76908	7.08424	14.8662	11.4495	8.95723	1.96232	4.81541	8.8639	5.01047	0.029399	0
srna2728414	CGGAACTGAGGCCATGATTAAGAGGGACGGCCGG	34	1	chr2	133012848	133012881	-	EXACT	refGene	NR_027020	ANKRD30BL	132905163	133015542	-	Homo sapiens ankyrin repeat domain 30B-like (ANKRD30BL), transcript variant 2, non-coding RNA.	1	6	2	3		4	2	1	7	3	11	1.32231	0	2.28311	2.85776	1.83335	1.6593	6.49389	4.9554	5.3431	2.23931	0.654108	0.802568	3.93716	2.37278	0.106009	0
srna4322533	GTAAAAGTCGTAACAAGGTTTCCGTAGGTGAACCTG	36	1	chr2	133011934	133011969	-	EXACT	refGene	NR_027020	ANKRD30BL	132905163	133015542	-	Homo sapiens ankyrin repeat domain 30B-like (ANKRD30BL), transcript variant 2, non-coding RNA.	13	5	2	1	1	7			8	9	11	1.32231	0.736106	0.761035	5.00107	0	1.56411	6.49389	4.1295	6.1064	6.71792	8.5034	0	6.39022	4.08555	0.00302738	0
srna579293	ACAAGGTTTCCGTAGGTGAACCTGCGGAAGGATCATTAA	39	1	chr2	133011919	133011957	-	EXACT	refGene	NR_027020	ANKRD30BL	132905163	133015542	-	Homo sapiens ankyrin repeat domain 30B-like (ANKRD30BL), transcript variant 2, non-coding RNA.	8	10	2	1	1	3	3	2	9	1	4	1.32231	0.736106	0.761035	2.14332	2.75002	1.54256	2.36141	8.259	6.8697	0.746436	5.23286	1.60514	4.69388	3.04292	0.0855721	0
srna475555	AATCAAGAACGAAAGTCGGAGGTTCGAAGACGATCAGA	38	1	chr2	133012723	133012760	-	EXACT	refGene	NR_027020	ANKRD30BL	132905163	133015542	-	Homo sapiens ankyrin repeat domain 30B-like (ANKRD30BL), transcript variant 2, non-coding RNA.	7	9	2	4	1	2	1	6	13		27	1.32231	0.736106	3.04414	1.42888	0.916674	1.48962	15.9395	7.4331	9.92291	0	4.57875	4.81541	7.57486	5.08509	0.0838228	0
srna1649163	ATTAATCAAGAACGAAAGTCGGAGGTTCGAAGACGATC	38	1	chr2	133012726	133012763	-	EXACT	refGene	NR_027020	ANKRD30BL	132905163	133015542	-	Homo sapiens ankyrin repeat domain 30B-like (ANKRD30BL), transcript variant 2, non-coding RNA.	5	1	4	5		1		4	8	11	12	2.64463	0	3.80518	0.714439	0	1.43285	7.08424	0.8259	6.1064	8.21079	3.27054	3.21027	5.09958	3.55905	0.0534385	0
srna436952	AAGTCGTAACAAGGTTTCCGTAGGTGAACCTG	32	1	chr2	133011934	133011965	-	EXACT	refGene	NR_027020	ANKRD30BL	132905163	133015542	-	Homo sapiens ankyrin repeat domain 30B-like (ANKRD30BL), transcript variant 2, non-coding RNA.	10	3	1	2		3	3	2	3	5	5	0.661157	0	1.52207	2.14332	2.75002	1.41531	2.95177	2.4777	2.2899	3.73218	6.54108	1.60514	3.59853	2.54256	0.0506419	0
srna6162832	TTTCGGAACTGAGGCCATGATTAAGAGGGACGGCCGG	37	1	chr2	133012848	133012884	-	EXACT	refGene	NR_027020	ANKRD30BL	132905163	133015542	-	Homo sapiens ankyrin repeat domain 30B-like (ANKRD30BL), transcript variant 2, non-coding RNA.	5	13	1	3	1	4		1	3	1	5	0.661157	0.736106	2.28311	2.85776	0	1.30762	2.95177	10.7367	2.2899	0.746436	3.27054	0.802568	3.99907	3.05827	0.202342	0
srna1736756	ATTTGCCAAGAATGTTTTCATTAATCAAGAACGAAAG	37	1	chr2	133012746	133012782	-	EXACT	refGene	NR_027020	ANKRD30BL	132905163	133015542	-	Homo sapiens ankyrin repeat domain 30B-like (ANKRD30BL), transcript variant 2, non-coding RNA.	4	2	1	3	4			1	9	5	12	0.661157	2.94442	2.28311	0	0	1.17774	7.08424	1.6518	6.8697	3.73218	2.61643	0.802568	4.39087	3.72823	0.0424559	0
srna4966841	TCAAGAACGAAAGTCGGAGGTTCGAAGACGATCAGATAC	39	1	chr2	133012720	133012758	-	EXACT	refGene	NR_027020	ANKRD30BL	132905163	133015542	-	Homo sapiens ankyrin repeat domain 30B-like (ANKRD30BL), transcript variant 2, non-coding RNA.	2	4	5	1		1	1		2	6	10	3.30579	0	0.761035	0.714439	0.916674	1.13959	5.90354	3.3036	1.5266	4.47861	1.30822	0	3.30411	2.8994	0.0769425	0
srna321643	AAGACGGACCAGAGCGAAAGCATTTGCCAAGAATGTT	37	1	chr2	133012767	133012797	-	CLIPPED	refGene	NR_027020	ANKRD30BL	132905163	133015542	-	Homo sapiens ankyrin repeat domain 30B-like (ANKRD30BL), transcript variant 2, non-coding RNA.	1	8	1	1	1	1	3	4	8	8	24	0.661157	0.736106	0.761035	0.714439	2.75002	1.12455	14.1685	6.6072	6.1064	5.97149	0.654108	3.21027	6.70154	5.9593	0.0600397	0
srna4693028	TAATCAAGAACGAAAGTCGGAGGTTCGAAGACGATCAGA	39	1	chr2	133012723	133012761	-	EXACT	refGene	NR_027020	ANKRD30BL	132905163	133015542	-	Homo sapiens ankyrin repeat domain 30B-like (ANKRD30BL), transcript variant 2, non-coding RNA.	2	3		3	1	2	1	3	10	3	8	0	0.736106	2.28311	1.42888	0.916674	1.07295	4.72283	2.4777	7.63301	2.23931	1.30822	2.4077	3.67621	3.42626	0.0833156	0
srna5331822	TGAAACTTAAAGGAATTGACGGAAGGGCACCACC	34	1	chr2	133012558	133012591	-	EXACT	refGene	NR_027020	ANKRD30BL	132905163	133015542	-	Homo sapiens ankyrin repeat domain 30B-like (ANKRD30BL), transcript variant 2, non-coding RNA.	1	5	1	5		1		2	1	6	10	0.661157	0	3.80518	0.714439	0	1.03615	5.90354	4.1295	0.763301	4.47861	0.654108	1.60514	3.18581	3.07465	0.134464	0
srna1801568	CAAGACGGACCAGAGCGAAAGCATTTGCCAAGAATGTTT	39	1	chr2	133012766	133012797	-	CLIPPED	refGene	NR_027020	ANKRD30BL	132905163	133015542	-	Homo sapiens ankyrin repeat domain 30B-like (ANKRD30BL), transcript variant 2, non-coding RNA.	2	4	3	1		2	1	9	18	10	15	1.98347	0	0.761035	1.42888	0.916674	1.01801	8.8553	3.3036	13.7394	7.46436	1.30822	7.22311	6.93418	6.81149	0.052548	0
srna1798651	CAAGAACGAAAGTCGGAGGTTCGAAGACGATCAGATAC	38	1	chr2	133012720	133012757	-	EXACT	refGene	NR_027020	ANKRD30BL	132905163	133015542	-	Homo sapiens ankyrin repeat domain 30B-like (ANKRD30BL), transcript variant 2, non-coding RNA.	8	8	4	1		1		2	7	10	9	2.64463	0	0.761035	0.714439	0	0.82402	5.31318	6.6072	5.3431	7.46436	5.23286	1.60514	5.99214	7.27184	5.22846e-05	0
srna5475649	TGCCAAGAATGTTTTCATTAATCAAGAACGAAAGT	35	1	chr2	133012745	133012779	-	EXACT	refGene	NR_027020	ANKRD30BL	132905163	133015542	-	Homo sapiens ankyrin repeat domain 30B-like (ANKRD30BL), transcript variant 2, non-coding RNA.		9	1			2	2		2	6	11	0.661157	0	0	1.42888	1.83335	0.784677	6.49389	7.4331	1.5266	4.47861	0	0	3.98644	5.08036	0.0864951	0
srna1247095	AGGGCAAGTCTGGTGCCAGCAGCCGCGGTAATTCCAGC	38	1	chr2	133013132	133013169	-	EXACT	refGene	NR_027020	ANKRD30BL	132905163	133015542	-	Homo sapiens ankyrin repeat domain 30B-like (ANKRD30BL), transcript variant 2, non-coding RNA.	3	10		3		2		2	2			0	0	2.28311	1.42888	0	0.742397	0	8.259	1.5266	0	1.96232	1.60514	2.34959	3.16487	0.363793	0
srna5820840	TTACAACTTCTTAGAGGGACAAGTGGCGTTCAGCCACC	38	1	chr2	133012310	133012344	-	CLIPPED	refGene	NR_027020	ANKRD30BL	132905163	133015542	-	Homo sapiens ankyrin repeat domain 30B-like (ANKRD30BL), transcript variant 2, non-coding RNA.	10			1	2		1					0	1.47221	0.761035	0	0.916674	0.629984	0	0	0	0	6.54108	0	1.30822	2.07658	0.636844	0
srna5780244	TGTTGGTTTTCGGAACTGAGGCCATGATTAAGAGGGA	37	1	chr2	133012855	133012891	-	EXACT	refGene	NR_027020	ANKRD30BL	132905163	133015542	-	Homo sapiens ankyrin repeat domain 30B-like (ANKRD30BL), transcript variant 2, non-coding RNA.		4	1	1	1		1	4	9	6	18	0.661157	0.736106	0.761035	0	0.916674	0.614994	10.6264	3.3036	6.8697	4.47861	0	3.21027	5.05566	8.22065	0.0667591	0
srna2628975	CGCAAGACGGACCAGAGCGAAAGCATTTGCCAAGAATGT	39	1	chr2	133012768	133012797	-	CLIPPED	refGene	NR_027020	ANKRD30BL	132905163	133015542	-	Homo sapiens ankyrin repeat domain 30B-like (ANKRD30BL), transcript variant 2, non-coding RNA.	7	4	1	2				5	18	14	13	0.661157	0	1.52207	0	0	0.436645	7.6746	3.3036	13.7394	10.4501	4.57875	4.01284	7.94929	18.2054	0.0161406	0
srna3183285	CTTACAACTTCTTAGAGGGACAAGTGGCGTTCAGCCACC	39	1	chr2	133012310	133012344	-	CLIPPED	refGene	NR_027020	ANKRD30BL	132905163	133015542	-	Homo sapiens ankyrin repeat domain 30B-like (ANKRD30BL), transcript variant 2, non-coding RNA.	29		1	1	1						2	0.661157	0.736106	0.761035	0	0	0.43166	1.18071	0	0	0	18.9691	0	4.02997	9.33598	0.390934	0
srna3179503	CTTAAACTTCTTAGAGGGACAAGTGGCGTTCAGCCACC	38	1	chr2	133012310	133012343	-	CLIPPED	refGene	NR_027020	ANKRD30BL	132905163	133015542	-	Homo sapiens ankyrin repeat domain 30B-like (ANKRD30BL), transcript variant 2, non-coding RNA.	17			1	1				2	1	2	0	0.736106	0.761035	0	0	0.299428	1.18071	0	1.5266	0.746436	11.1198	0	2.91472	9.73427	0.275096	0
srna795747	ACGGACCAGAGCGAAAGCATTTGCCAAGAATG	32	1	chr2	133012769	133012797	-	CLIPPED	refGene	NR_027020	ANKRD30BL	132905163	133015542	-	Homo sapiens ankyrin repeat domain 30B-like (ANKRD30BL), transcript variant 2, non-coding RNA.		1						2	3	3	10	0	0	0	0	0	0	5.90354	0.8259	2.2899	2.23931	0	1.60514	2.25173	#DIV/0!	0.0898771	0
srna3757486	GCCCCAGTTGCCTAATGGA	19	1	chr2	198099548	198099566	+	EXACT	refGene	NM_001195144	ANKRD44	197851385	198175521	-	Homo sapiens ankyrin repeat domain 44 (ANKRD44), transcript variant A, mRNA.	167	79	66	27	114	48	39	51	97	155	340	43.6364	83.9161	20.5479	34.2931	35.7503	43.6288	200.72	65.2461	74.0401	115.698	109.236	40.931	112.988	2.58976	0.0416695	1
srna3757486	GCCCCAGTTGCCTAATGGA	19	1	chr2	198099548	198099566	+	EXACT	refGene	NM_153697	ANKRD44	197964194	198175521	-	Homo sapiens ankyrin repeat domain 44 (ANKRD44), transcript variant B, mRNA.	167	79	66	27	114	48	39	51	97	155	340	43.6364	83.9161	20.5479	34.2931	35.7503	43.6288	200.72	65.2461	74.0401	115.698	109.236	40.931	112.988	2.58976	0.0416695	1
srna3757485	GCCCCAGTTGCCTAATGG	18	1	chr2	198099548	198099565	+	EXACT	refGene	NM_001195144	ANKRD44	197851385	198175521	-	Homo sapiens ankyrin repeat domain 44 (ANKRD44), transcript variant A, mRNA.	12	17	5	5	15	9	9	9	21	19	39	3.30579	11.0416	3.80518	6.42995	8.25007	6.56651	23.0238	14.0403	16.0293	14.1823	7.84929	7.22311	15.025	2.28812	0.0219363	0
srna3757485	GCCCCAGTTGCCTAATGG	18	1	chr2	198099548	198099565	+	EXACT	refGene	NM_153697	ANKRD44	197964194	198175521	-	Homo sapiens ankyrin repeat domain 44 (ANKRD44), transcript variant B, mRNA.	12	17	5	5	15	9	9	9	21	19	39	3.30579	11.0416	3.80518	6.42995	8.25007	6.56651	23.0238	14.0403	16.0293	14.1823	7.84929	7.22311	15.025	2.28812	0.0219363	0
srna2303924	CCCCAGTTGCCTAATGGA	18	1	chr2	198099549	198099566	+	EXACT	refGene	NM_001195144	ANKRD44	197851385	198175521	-	Homo sapiens ankyrin repeat domain 44 (ANKRD44), transcript variant A, mRNA.	4	6	7	3	7	2		2	3	12	20	4.6281	5.15274	2.28311	1.42888	0	2.69856	11.8071	4.9554	2.2899	8.95723	2.61643	1.60514	6.12521	2.2698	0.152184	0
srna2303924	CCCCAGTTGCCTAATGGA	18	1	chr2	198099549	198099566	+	EXACT	refGene	NM_153697	ANKRD44	197964194	198175521	-	Homo sapiens ankyrin repeat domain 44 (ANKRD44), transcript variant B, mRNA.	4	6	7	3	7	2		2	3	12	20	4.6281	5.15274	2.28311	1.42888	0	2.69856	11.8071	4.9554	2.2899	8.95723	2.61643	1.60514	6.12521	2.2698	0.152184	0
srna5725588	TGTCCCACCTGGGGTGCC	18	1	chr2	242150409	242150426	-	EXACT	refGene	NM_001001891	ANO7	242127923	242164791	+	Homo sapiens anoctamin 7 (ANO7), transcript variant NGEP-L, mRNA.	1	9	1	4	6	16	3	5	3	1	3	0.661157	4.41664	3.04414	11.431	2.75002	4.4606	1.77106	7.4331	2.2899	0.746436	0.654108	4.01284	2.57892	0.578156	0.426197	0
srna2715522	CGCTCATGATGAGCAAACTGAGCCTCTAAGAAGTTGAC	38	1	chr22	29729170	29729207	-	EXACT	refGene	NM_001127	AP1B1	29723668	29784572	-	Homo sapiens adaptor-related protein complex 1, beta 1 subunit (AP1B1), transcript variant 1, mRNA.	59	27	38	35	11	28	11	15	26	16	13	25.124	8.09717	26.6362	20.0043	10.0834	17.989	7.6746	22.2993	19.8458	11.943	38.5924	12.0385	20.071	1.11574	0.759538	0
srna2715522	CGCTCATGATGAGCAAACTGAGCCTCTAAGAAGTTGAC	38	1	chr22	29729170	29729207	-	EXACT	refGene	NM_001166019	AP1B1	29723668	29784572	-	Homo sapiens adaptor-related protein complex 1, beta 1 subunit (AP1B1), transcript variant 3, mRNA.	59	27	38	35	11	28	11	15	26	16	13	25.124	8.09717	26.6362	20.0043	10.0834	17.989	7.6746	22.2993	19.8458	11.943	38.5924	12.0385	20.071	1.11574	0.759538	0
srna2715522	CGCTCATGATGAGCAAACTGAGCCTCTAAGAAGTTGAC	38	1	chr22	29729170	29729207	-	EXACT	refGene	NM_145730	AP1B1	29723668	29784572	-	Homo sapiens adaptor-related protein complex 1, beta 1 subunit (AP1B1), transcript variant 2, mRNA.	59	27	38	35	11	28	11	15	26	16	13	25.124	8.09717	26.6362	20.0043	10.0834	17.989	7.6746	22.2993	19.8458	11.943	38.5924	12.0385	20.071	1.11574	0.759538	0
srna2510719	CCTCCTGATGATTCTTCTTCCTGAGCACGCTCATGATG	38	1	chr22	29729197	29729234	-	EXACT	refGene	NM_001127	AP1B1	29723668	29784572	-	Homo sapiens adaptor-related protein complex 1, beta 1 subunit (AP1B1), transcript variant 1, mRNA.	30	12	23	15	1	8	7	5	9	4	2	15.2066	0.736106	11.4155	5.71551	6.41672	7.89809	1.18071	9.9108	6.8697	2.98574	19.6232	4.01284	8.11404	1.02734	0.95934	0
srna2510719	CCTCCTGATGATTCTTCTTCCTGAGCACGCTCATGATG	38	1	chr22	29729197	29729234	-	EXACT	refGene	NM_001166019	AP1B1	29723668	29784572	-	Homo sapiens adaptor-related protein complex 1, beta 1 subunit (AP1B1), transcript variant 3, mRNA.	30	12	23	15	1	8	7	5	9	4	2	15.2066	0.736106	11.4155	5.71551	6.41672	7.89809	1.18071	9.9108	6.8697	2.98574	19.6232	4.01284	8.11404	1.02734	0.95934	0
srna2510719	CCTCCTGATGATTCTTCTTCCTGAGCACGCTCATGATG	38	1	chr22	29729197	29729234	-	EXACT	refGene	NM_145730	AP1B1	29723668	29784572	-	Homo sapiens adaptor-related protein complex 1, beta 1 subunit (AP1B1), transcript variant 2, mRNA.	30	12	23	15	1	8	7	5	9	4	2	15.2066	0.736106	11.4155	5.71551	6.41672	7.89809	1.18071	9.9108	6.8697	2.98574	19.6232	4.01284	8.11404	1.02734	0.95934	0
srna2510712	CCTCCTGATGATTCTTCTTCCTGAGC	26	1	chr22	29729209	29729234	-	EXACT	refGene	NM_001127	AP1B1	29723668	29784572	-	Homo sapiens adaptor-related protein complex 1, beta 1 subunit (AP1B1), transcript variant 1, mRNA.	5	4	9	1	2	6	5	10	10	5		5.95041	1.47221	0.761035	4.28663	4.58337	3.41073	0	3.3036	7.63301	3.73218	3.27054	8.02568	3.58786	1.05193	0.912634	0
srna2510712	CCTCCTGATGATTCTTCTTCCTGAGC	26	1	chr22	29729209	29729234	-	EXACT	refGene	NM_001166019	AP1B1	29723668	29784572	-	Homo sapiens adaptor-related protein complex 1, beta 1 subunit (AP1B1), transcript variant 3, mRNA.	5	4	9	1	2	6	5	10	10	5		5.95041	1.47221	0.761035	4.28663	4.58337	3.41073	0	3.3036	7.63301	3.73218	3.27054	8.02568	3.58786	1.05193	0.912634	0
srna2510712	CCTCCTGATGATTCTTCTTCCTGAGC	26	1	chr22	29729209	29729234	-	EXACT	refGene	NM_145730	AP1B1	29723668	29784572	-	Homo sapiens adaptor-related protein complex 1, beta 1 subunit (AP1B1), transcript variant 2, mRNA.	5	4	9	1	2	6	5	10	10	5		5.95041	1.47221	0.761035	4.28663	4.58337	3.41073	0	3.3036	7.63301	3.73218	3.27054	8.02568	3.58786	1.05193	0.912634	0
srna6045062	TTGGAGGATGAAAGTACGGAGTGATCCATCGGCTAAGTG	39	1	chr16	71792346	71792384	-	EXACT	refGene	NM_001030007	AP1G1	71762904	71842976	-	Homo sapiens adaptor-related protein complex 1, gamma 1 subunit (AP1G1), transcript variant 1, mRNA.	119	576	503	156	75	253	159	182	416	152	24	332.562	55.2079	118.721	180.753	145.751	166.599	14.1685	475.719	317.533	113.458	77.8388	146.067	199.743	1.19895	0.744906	1
srna6045062	TTGGAGGATGAAAGTACGGAGTGATCCATCGGCTAAGTG	39	1	chr16	71792346	71792384	-	EXACT	refGene	NM_001128	AP1G1	71762904	71842976	-	Homo sapiens adaptor-related protein complex 1, gamma 1 subunit (AP1G1), transcript variant 2, mRNA.	119	576	503	156	75	253	159	182	416	152	24	332.562	55.2079	118.721	180.753	145.751	166.599	14.1685	475.719	317.533	113.458	77.8388	146.067	199.743	1.19895	0.744906	1
srna4560854	GTTGGAGGATGAAAGTACGGAGTGATCCATCGGCTAAG	38	1	chr16	71792348	71792385	-	EXACT	refGene	NM_001030007	AP1G1	71762904	71842976	-	Homo sapiens adaptor-related protein complex 1, gamma 1 subunit (AP1G1), transcript variant 1, mRNA.	90	282	184	101	76	183	93	119	169	80	24	121.653	55.9441	76.8645	130.742	85.2507	94.0909	14.1685	232.904	128.998	59.7149	58.8697	95.5056	98.9309	1.05144	0.909895	0
srna4560854	GTTGGAGGATGAAAGTACGGAGTGATCCATCGGCTAAG	38	1	chr16	71792348	71792385	-	EXACT	refGene	NM_001128	AP1G1	71762904	71842976	-	Homo sapiens adaptor-related protein complex 1, gamma 1 subunit (AP1G1), transcript variant 2, mRNA.	90	282	184	101	76	183	93	119	169	80	24	121.653	55.9441	76.8645	130.742	85.2507	94.0909	14.1685	232.904	128.998	59.7149	58.8697	95.5056	98.9309	1.05144	0.909895	0
srna6045007	TTGGAGGATGAAAGTACGGAGTGAT	25	1	chr16	71792360	71792384	-	EXACT	refGene	NM_001030007	AP1G1	71762904	71842976	-	Homo sapiens adaptor-related protein complex 1, gamma 1 subunit (AP1G1), transcript variant 1, mRNA.	12	59	61	46	20	61	44	50	29	30	9	40.3306	14.7221	35.0076	43.5808	40.3337	34.7949	5.31318	48.7281	22.1357	22.3931	7.84929	40.1284	21.2839	0.611694	0.189767	0
srna6045007	TTGGAGGATGAAAGTACGGAGTGAT	25	1	chr16	71792360	71792384	-	EXACT	refGene	NM_001128	AP1G1	71762904	71842976	-	Homo sapiens adaptor-related protein complex 1, gamma 1 subunit (AP1G1), transcript variant 2, mRNA.	12	59	61	46	20	61	44	50	29	30	9	40.3306	14.7221	35.0076	43.5808	40.3337	34.7949	5.31318	48.7281	22.1357	22.3931	7.84929	40.1284	21.2839	0.611694	0.189767	0
srna6045023	TTGGAGGATGAAAGTACGGAGTGATCC	27	1	chr16	71792358	71792384	-	EXACT	refGene	NM_001030007	AP1G1	71762904	71842976	-	Homo sapiens adaptor-related protein complex 1, gamma 1 subunit (AP1G1), transcript variant 1, mRNA.	14	84	79	46	10	32	56	31	33	40	22	52.2314	7.36106	35.0076	22.862	51.3338	33.7592	12.9878	69.3756	25.1889	29.8574	9.15751	24.8796	29.3135	0.868311	0.75454	0
srna6045023	TTGGAGGATGAAAGTACGGAGTGATCC	27	1	chr16	71792358	71792384	-	EXACT	refGene	NM_001128	AP1G1	71762904	71842976	-	Homo sapiens adaptor-related protein complex 1, gamma 1 subunit (AP1G1), transcript variant 2, mRNA.	14	84	79	46	10	32	56	31	33	40	22	52.2314	7.36106	35.0076	22.862	51.3338	33.7592	12.9878	69.3756	25.1889	29.8574	9.15751	24.8796	29.3135	0.868311	0.75454	0
srna6045061	TTGGAGGATGAAAGTACGGAGTGATCCATCGGCTAAGT	38	1	chr16	71792347	71792384	-	EXACT	refGene	NM_001030007	AP1G1	71762904	71842976	-	Homo sapiens adaptor-related protein complex 1, gamma 1 subunit (AP1G1), transcript variant 1, mRNA.	45	70	47	61	18	35	34	36	50	25	3	31.0744	13.2499	46.4231	25.0054	31.1669	29.3839	1.77106	57.813	38.165	18.6609	29.4349	28.8925	29.169	0.992684	0.984747	0
srna6045061	TTGGAGGATGAAAGTACGGAGTGATCCATCGGCTAAGT	38	1	chr16	71792347	71792384	-	EXACT	refGene	NM_001128	AP1G1	71762904	71842976	-	Homo sapiens adaptor-related protein complex 1, gamma 1 subunit (AP1G1), transcript variant 2, mRNA.	45	70	47	61	18	35	34	36	50	25	3	31.0744	13.2499	46.4231	25.0054	31.1669	29.3839	1.77106	57.813	38.165	18.6609	29.4349	28.8925	29.169	0.992684	0.984747	0
srna4560809	GTTGGAGGATGAAAGTACGGAGTGAT	26	1	chr16	71792360	71792385	-	EXACT	refGene	NM_001030007	AP1G1	71762904	71842976	-	Homo sapiens adaptor-related protein complex 1, gamma 1 subunit (AP1G1), transcript variant 1, mRNA.	11	29	52	29	25	45	33	44	23	27	6	34.3802	18.4026	22.07	32.1497	30.2503	27.4506	3.54212	23.9511	17.5559	20.1538	7.19519	35.313	14.4796	0.52748	0.0324174	0
srna4560809	GTTGGAGGATGAAAGTACGGAGTGAT	26	1	chr16	71792360	71792385	-	EXACT	refGene	NM_001128	AP1G1	71762904	71842976	-	Homo sapiens adaptor-related protein complex 1, gamma 1 subunit (AP1G1), transcript variant 2, mRNA.	11	29	52	29	25	45	33	44	23	27	6	34.3802	18.4026	22.07	32.1497	30.2503	27.4506	3.54212	23.9511	17.5559	20.1538	7.19519	35.313	14.4796	0.52748	0.0324174	0
srna6045018	TTGGAGGATGAAAGTACGGAGTGATC	26	1	chr16	71792359	71792384	-	EXACT	refGene	NM_001030007	AP1G1	71762904	71842976	-	Homo sapiens adaptor-related protein complex 1, gamma 1 subunit (AP1G1), transcript variant 1, mRNA.	7	65	51	38	5	19	34	40	29	18	8	33.719	3.68053	28.9193	13.5743	31.1669	22.212	4.72283	53.6835	22.1357	13.4358	4.57875	32.1027	19.7113	0.887417	0.823547	0
srna6045018	TTGGAGGATGAAAGTACGGAGTGATC	26	1	chr16	71792359	71792384	-	EXACT	refGene	NM_001128	AP1G1	71762904	71842976	-	Homo sapiens adaptor-related protein complex 1, gamma 1 subunit (AP1G1), transcript variant 2, mRNA.	7	65	51	38	5	19	34	40	29	18	8	33.719	3.68053	28.9193	13.5743	31.1669	22.212	4.72283	53.6835	22.1357	13.4358	4.57875	32.1027	19.7113	0.887417	0.823547	0
srna4560819	GTTGGAGGATGAAAGTACGGAGTGATC	27	1	chr16	71792359	71792385	-	EXACT	refGene	NM_001030007	AP1G1	71762904	71842976	-	Homo sapiens adaptor-related protein complex 1, gamma 1 subunit (AP1G1), transcript variant 1, mRNA.	2	44	43	40	6	17	36	34	22	21	7	28.4298	4.41664	30.4414	12.1455	33.0003	21.6867	4.13248	36.3396	16.7926	15.6752	1.30822	27.2873	14.8496	0.684733	0.438274	0
srna4560819	GTTGGAGGATGAAAGTACGGAGTGATC	27	1	chr16	71792359	71792385	-	EXACT	refGene	NM_001128	AP1G1	71762904	71842976	-	Homo sapiens adaptor-related protein complex 1, gamma 1 subunit (AP1G1), transcript variant 2, mRNA.	2	44	43	40	6	17	36	34	22	21	7	28.4298	4.41664	30.4414	12.1455	33.0003	21.6867	4.13248	36.3396	16.7926	15.6752	1.30822	27.2873	14.8496	0.684733	0.438274	0
srna4560855	GTTGGAGGATGAAAGTACGGAGTGATCCATCGGCTAAGT	39	1	chr16	71792347	71792385	-	EXACT	refGene	NM_001030007	AP1G1	71762904	71842976	-	Homo sapiens adaptor-related protein complex 1, gamma 1 subunit (AP1G1), transcript variant 1, mRNA.	32	28	19	21	11	10	22	10	14	6	2	12.562	8.09717	15.9817	7.14439	20.1668	12.7904	1.18071	23.1252	10.6862	4.47861	20.9314	8.02568	12.0804	0.944491	0.89125	0
srna4560855	GTTGGAGGATGAAAGTACGGAGTGATCCATCGGCTAAGT	39	1	chr16	71792347	71792385	-	EXACT	refGene	NM_001128	AP1G1	71762904	71842976	-	Homo sapiens adaptor-related protein complex 1, gamma 1 subunit (AP1G1), transcript variant 2, mRNA.	32	28	19	21	11	10	22	10	14	6	2	12.562	8.09717	15.9817	7.14439	20.1668	12.7904	1.18071	23.1252	10.6862	4.47861	20.9314	8.02568	12.0804	0.944491	0.89125	0
srna6045057	TTGGAGGATGAAAGTACGGAGTGATCCATCGGCTAAG	37	1	chr16	71792348	71792384	-	EXACT	refGene	NM_001030007	AP1G1	71762904	71842976	-	Homo sapiens adaptor-related protein complex 1, gamma 1 subunit (AP1G1), transcript variant 1, mRNA.	17	29	23	19	3	25	13	12	22	10	2	15.2066	2.20832	14.4597	17.861	11.9168	12.3305	1.18071	23.9511	16.7926	7.46436	11.1198	9.63082	12.1017	0.981449	0.96287	0
srna6045057	TTGGAGGATGAAAGTACGGAGTGATCCATCGGCTAAG	37	1	chr16	71792348	71792384	-	EXACT	refGene	NM_001128	AP1G1	71762904	71842976	-	Homo sapiens adaptor-related protein complex 1, gamma 1 subunit (AP1G1), transcript variant 2, mRNA.	17	29	23	19	3	25	13	12	22	10	2	15.2066	2.20832	14.4597	17.861	11.9168	12.3305	1.18071	23.9511	16.7926	7.46436	11.1198	9.63082	12.1017	0.981449	0.96287	0
srna4560772	GTTGGAGGATGAAAGTACG	19	1	chr16	71792367	71792385	-	EXACT	refGene	NM_001030007	AP1G1	71762904	71842976	-	Homo sapiens adaptor-related protein complex 1, gamma 1 subunit (AP1G1), transcript variant 1, mRNA.	5	24	23	10	6	15	23	11	15	7	1	15.2066	4.41664	7.61035	10.7166	21.0835	11.8067	0.590354	19.8216	11.4495	5.22505	3.27054	8.82825	8.07141	0.683628	0.4326	0
srna4560772	GTTGGAGGATGAAAGTACG	19	1	chr16	71792367	71792385	-	EXACT	refGene	NM_001128	AP1G1	71762904	71842976	-	Homo sapiens adaptor-related protein complex 1, gamma 1 subunit (AP1G1), transcript variant 2, mRNA.	5	24	23	10	6	15	23	11	15	7	1	15.2066	4.41664	7.61035	10.7166	21.0835	11.8067	0.590354	19.8216	11.4495	5.22505	3.27054	8.82825	8.07141	0.683628	0.4326	0
srna4560851	GTTGGAGGATGAAAGTACGGAGTGATCCATCGGCT	35	1	chr16	71792351	71792385	-	EXACT	refGene	NM_001030007	AP1G1	71762904	71842976	-	Homo sapiens adaptor-related protein complex 1, gamma 1 subunit (AP1G1), transcript variant 1, mRNA.	6	30	24	5	18	19	9	18	13	9	1	15.8678	13.2499	3.80518	13.5743	8.25007	10.9495	0.590354	24.777	9.92291	6.71792	3.92465	14.4462	9.18657	0.838998	0.721723	0
srna4560851	GTTGGAGGATGAAAGTACGGAGTGATCCATCGGCT	35	1	chr16	71792351	71792385	-	EXACT	refGene	NM_001128	AP1G1	71762904	71842976	-	Homo sapiens adaptor-related protein complex 1, gamma 1 subunit (AP1G1), transcript variant 2, mRNA.	6	30	24	5	18	19	9	18	13	9	1	15.8678	13.2499	3.80518	13.5743	8.25007	10.9495	0.590354	24.777	9.92291	6.71792	3.92465	14.4462	9.18657	0.838998	0.721723	0
srna5196579	TCGGCTAAGTGTCTTGTCACAATGCTGACACTCAAAC	37	1	chr16	71792320	71792356	-	EXACT	refGene	NM_001030007	AP1G1	71762904	71842976	-	Homo sapiens adaptor-related protein complex 1, gamma 1 subunit (AP1G1), transcript variant 1, mRNA.	17	37	28	19	2	12	11	17	37	50	8	18.5124	1.47221	14.4597	8.57327	10.0834	10.6202	4.72283	30.5583	28.2421	37.3218	11.1198	13.6437	22.393	2.10853	0.137737	0
srna5196579	TCGGCTAAGTGTCTTGTCACAATGCTGACACTCAAAC	37	1	chr16	71792320	71792356	-	EXACT	refGene	NM_001128	AP1G1	71762904	71842976	-	Homo sapiens adaptor-related protein complex 1, gamma 1 subunit (AP1G1), transcript variant 2, mRNA.	17	37	28	19	2	12	11	17	37	50	8	18.5124	1.47221	14.4597	8.57327	10.0834	10.6202	4.72283	30.5583	28.2421	37.3218	11.1198	13.6437	22.393	2.10853	0.137737	0
srna6045024	TTGGAGGATGAAAGTACGGAGTGATCCA	28	1	chr16	71792357	71792384	-	EXACT	refGene	NM_001030007	AP1G1	71762904	71842976	-	Homo sapiens adaptor-related protein complex 1, gamma 1 subunit (AP1G1), transcript variant 1, mRNA.	1	29	14	12	6	10	24	9	17	14	1	9.2562	4.41664	9.13242	7.14439	22.0002	10.39	0.590354	23.9511	12.9761	10.4501	0.654108	7.22311	9.72436	0.935937	0.903631	0
srna6045024	TTGGAGGATGAAAGTACGGAGTGATCCA	28	1	chr16	71792357	71792384	-	EXACT	refGene	NM_001128	AP1G1	71762904	71842976	-	Homo sapiens adaptor-related protein complex 1, gamma 1 subunit (AP1G1), transcript variant 2, mRNA.	1	29	14	12	6	10	24	9	17	14	1	9.2562	4.41664	9.13242	7.14439	22.0002	10.39	0.590354	23.9511	12.9761	10.4501	0.654108	7.22311	9.72436	0.935937	0.903631	0
srna6045032	TTGGAGGATGAAAGTACGGAGTGATCCAT	29	1	chr16	71792356	71792384	-	EXACT	refGene	NM_001030007	AP1G1	71762904	71842976	-	Homo sapiens adaptor-related protein complex 1, gamma 1 subunit (AP1G1), transcript variant 1, mRNA.	4	24	18	8	3	13	21	5	8	9	1	11.9008	2.20832	6.08828	9.2877	19.2502	9.74706	0.590354	19.8216	6.1064	6.71792	2.61643	4.01284	7.17054	0.735662	0.57641	0
srna6045032	TTGGAGGATGAAAGTACGGAGTGATCCAT	29	1	chr16	71792356	71792384	-	EXACT	refGene	NM_001128	AP1G1	71762904	71842976	-	Homo sapiens adaptor-related protein complex 1, gamma 1 subunit (AP1G1), transcript variant 2, mRNA.	4	24	18	8	3	13	21	5	8	9	1	11.9008	2.20832	6.08828	9.2877	19.2502	9.74706	0.590354	19.8216	6.1064	6.71792	2.61643	4.01284	7.17054	0.735662	0.57641	0
srna6044947	TTGGAGGATGAAAGTACG	18	1	chr16	71792367	71792384	-	EXACT	refGene	NM_001030007	AP1G1	71762904	71842976	-	Homo sapiens adaptor-related protein complex 1, gamma 1 subunit (AP1G1), transcript variant 1, mRNA.	1	53	16	10	6	9	21	17	11	11	2	10.5785	4.41664	7.61035	6.42995	19.2502	9.65712	1.18071	43.7727	8.39631	8.21079	0.654108	13.6437	12.4429	1.28847	0.754503	0
srna6044947	TTGGAGGATGAAAGTACG	18	1	chr16	71792367	71792384	-	EXACT	refGene	NM_001128	AP1G1	71762904	71842976	-	Homo sapiens adaptor-related protein complex 1, gamma 1 subunit (AP1G1), transcript variant 2, mRNA.	1	53	16	10	6	9	21	17	11	11	2	10.5785	4.41664	7.61035	6.42995	19.2502	9.65712	1.18071	43.7727	8.39631	8.21079	0.654108	13.6437	12.4429	1.28847	0.754503	0
srna4560803	GTTGGAGGATGAAAGTACGGAGTGA	25	1	chr16	71792361	71792385	-	EXACT	refGene	NM_001030007	AP1G1	71762904	71842976	-	Homo sapiens adaptor-related protein complex 1, gamma 1 subunit (AP1G1), transcript variant 1, mRNA.	9	16	11	8	17	20	7	11	14	6	5	7.27273	12.5138	6.08828	14.2888	6.41672	9.31606	2.95177	13.2144	10.6862	4.47861	5.88697	8.82825	7.44359	0.799006	0.489059	0
srna4560803	GTTGGAGGATGAAAGTACGGAGTGA	25	1	chr16	71792361	71792385	-	EXACT	refGene	NM_001128	AP1G1	71762904	71842976	-	Homo sapiens adaptor-related protein complex 1, gamma 1 subunit (AP1G1), transcript variant 2, mRNA.	9	16	11	8	17	20	7	11	14	6	5	7.27273	12.5138	6.08828	14.2888	6.41672	9.31606	2.95177	13.2144	10.6862	4.47861	5.88697	8.82825	7.44359	0.799006	0.489059	0
srna6045037	TTGGAGGATGAAAGTACGGAGTGATCCATC	30	1	chr16	71792355	71792384	-	EXACT	refGene	NM_001030007	AP1G1	71762904	71842976	-	Homo sapiens adaptor-related protein complex 1, gamma 1 subunit (AP1G1), transcript variant 1, mRNA.	2	51	21	11	4	7	17	18	20	5	2	13.8843	2.94442	8.37139	5.00107	15.5835	9.15693	1.18071	42.1209	15.266	3.73218	1.30822	14.4462	12.7216	1.38929	0.68162	0
srna6045037	TTGGAGGATGAAAGTACGGAGTGATCCATC	30	1	chr16	71792355	71792384	-	EXACT	refGene	NM_001128	AP1G1	71762904	71842976	-	Homo sapiens adaptor-related protein complex 1, gamma 1 subunit (AP1G1), transcript variant 2, mRNA.	2	51	21	11	4	7	17	18	20	5	2	13.8843	2.94442	8.37139	5.00107	15.5835	9.15693	1.18071	42.1209	15.266	3.73218	1.30822	14.4462	12.7216	1.38929	0.68162	0
srna1839775	CACAATGCTGACACTCAAACTGCTGACA	28	1	chr16	71792312	71792339	-	EXACT	refGene	NM_001030007	AP1G1	71762904	71842976	-	Homo sapiens adaptor-related protein complex 1, gamma 1 subunit (AP1G1), transcript variant 1, mRNA.	8	11	19	19	6	7	8	15	6	5	3	12.562	4.41664	14.4597	5.00107	7.33339	8.75455	1.77106	9.0849	4.5798	3.73218	5.23286	12.0385	4.88016	0.557443	0.147059	0
srna1839775	CACAATGCTGACACTCAAACTGCTGACA	28	1	chr16	71792312	71792339	-	EXACT	refGene	NM_001128	AP1G1	71762904	71842976	-	Homo sapiens adaptor-related protein complex 1, gamma 1 subunit (AP1G1), transcript variant 2, mRNA.	8	11	19	19	6	7	8	15	6	5	3	12.562	4.41664	14.4597	5.00107	7.33339	8.75455	1.77106	9.0849	4.5798	3.73218	5.23286	12.0385	4.88016	0.557443	0.147059	0
srna6045001	TTGGAGGATGAAAGTACGGAGTGA	24	1	chr16	71792361	71792384	-	EXACT	refGene	NM_001030007	AP1G1	71762904	71842976	-	Homo sapiens adaptor-related protein complex 1, gamma 1 subunit (AP1G1), transcript variant 1, mRNA.	3	16	10	5	10	13	14	11	20	4	4	6.61157	7.36106	3.80518	9.2877	12.8334	7.97979	2.36141	13.2144	15.266	2.98574	1.96232	8.82825	7.15798	0.897013	0.810382	0
srna6045001	TTGGAGGATGAAAGTACGGAGTGA	24	1	chr16	71792361	71792384	-	EXACT	refGene	NM_001128	AP1G1	71762904	71842976	-	Homo sapiens adaptor-related protein complex 1, gamma 1 subunit (AP1G1), transcript variant 2, mRNA.	3	16	10	5	10	13	14	11	20	4	4	6.61157	7.36106	3.80518	9.2877	12.8334	7.97979	2.36141	13.2144	15.266	2.98574	1.96232	8.82825	7.15798	0.897013	0.810382	0
srna4560831	GTTGGAGGATGAAAGTACGGAGTGATCCA	29	1	chr16	71792357	71792385	-	EXACT	refGene	NM_001030007	AP1G1	71762904	71842976	-	Homo sapiens adaptor-related protein complex 1, gamma 1 subunit (AP1G1), transcript variant 1, mRNA.	2	15	19	4	4	12	13	11	7	24	1	12.562	2.94442	3.04414	8.57327	11.9168	7.80812	0.590354	12.3885	5.3431	17.9145	1.30822	8.82825	7.50893	0.961682	0.941598	0
srna4560831	GTTGGAGGATGAAAGTACGGAGTGATCCA	29	1	chr16	71792357	71792385	-	EXACT	refGene	NM_001128	AP1G1	71762904	71842976	-	Homo sapiens adaptor-related protein complex 1, gamma 1 subunit (AP1G1), transcript variant 2, mRNA.	2	15	19	4	4	12	13	11	7	24	1	12.562	2.94442	3.04414	8.57327	11.9168	7.80812	0.590354	12.3885	5.3431	17.9145	1.30822	8.82825	7.50893	0.961682	0.941598	0
srna6045053	TTGGAGGATGAAAGTACGGAGTGATCCATCGGCT	34	1	chr16	71792351	71792384	-	EXACT	refGene	NM_001030007	AP1G1	71762904	71842976	-	Homo sapiens adaptor-related protein complex 1, gamma 1 subunit (AP1G1), transcript variant 1, mRNA.	5	39	17	8	3	13	11	16	21	15	5	11.2397	2.20832	6.08828	9.2877	10.0834	7.78148	2.95177	32.2101	16.0293	11.1965	3.27054	12.8411	13.1317	1.68755	0.386703	0
srna6045053	TTGGAGGATGAAAGTACGGAGTGATCCATCGGCT	34	1	chr16	71792351	71792384	-	EXACT	refGene	NM_001128	AP1G1	71762904	71842976	-	Homo sapiens adaptor-related protein complex 1, gamma 1 subunit (AP1G1), transcript variant 2, mRNA.	5	39	17	8	3	13	11	16	21	15	5	11.2397	2.20832	6.08828	9.2877	10.0834	7.78148	2.95177	32.2101	16.0293	11.1965	3.27054	12.8411	13.1317	1.68755	0.386703	0
srna4977667	TCACAATGCTGACACTCAAACTGCTGACA	29	1	chr16	71792312	71792340	-	EXACT	refGene	NM_001030007	AP1G1	71762904	71842976	-	Homo sapiens adaptor-related protein complex 1, gamma 1 subunit (AP1G1), transcript variant 1, mRNA.	9	9	19	13	8	5	7	5	7	7	6	12.562	5.88885	9.89346	3.57219	6.41672	7.66664	3.54212	7.4331	5.3431	5.22505	5.88697	4.01284	5.48607	0.715577	0.255228	0
srna4977667	TCACAATGCTGACACTCAAACTGCTGACA	29	1	chr16	71792312	71792340	-	EXACT	refGene	NM_001128	AP1G1	71762904	71842976	-	Homo sapiens adaptor-related protein complex 1, gamma 1 subunit (AP1G1), transcript variant 2, mRNA.	9	9	19	13	8	5	7	5	7	7	6	12.562	5.88885	9.89346	3.57219	6.41672	7.66664	3.54212	7.4331	5.3431	5.22505	5.88697	4.01284	5.48607	0.715577	0.255228	0
srna4560790	GTTGGAGGATGAAAGTACGGAGT	23	1	chr16	71792363	71792385	-	EXACT	refGene	NM_001030007	AP1G1	71762904	71842976	-	Homo sapiens adaptor-related protein complex 1, gamma 1 subunit (AP1G1), transcript variant 1, mRNA.	19	18	17	5	8	12	8	20	8	23		11.2397	5.88885	3.80518	8.57327	7.33339	7.36807	0	14.8662	6.1064	17.168	12.428	16.0514	10.1137	1.37264	0.450834	0
srna4560790	GTTGGAGGATGAAAGTACGGAGT	23	1	chr16	71792363	71792385	-	EXACT	refGene	NM_001128	AP1G1	71762904	71842976	-	Homo sapiens adaptor-related protein complex 1, gamma 1 subunit (AP1G1), transcript variant 2, mRNA.	19	18	17	5	8	12	8	20	8	23		11.2397	5.88885	3.80518	8.57327	7.33339	7.36807	0	14.8662	6.1064	17.168	12.428	16.0514	10.1137	1.37264	0.450834	0
srna6044982	TTGGAGGATGAAAGTACGGAGT	22	1	chr16	71792363	71792384	-	EXACT	refGene	NM_001030007	AP1G1	71762904	71842976	-	Homo sapiens adaptor-related protein complex 1, gamma 1 subunit (AP1G1), transcript variant 1, mRNA.	7	13	10	7	9	12	10	17	2	15	4	6.61157	6.62495	5.32725	8.57327	9.16674	7.26076	2.36141	10.7367	1.5266	11.1965	4.57875	13.6437	6.08	0.837379	0.610847	0
srna6044982	TTGGAGGATGAAAGTACGGAGT	22	1	chr16	71792363	71792384	-	EXACT	refGene	NM_001128	AP1G1	71762904	71842976	-	Homo sapiens adaptor-related protein complex 1, gamma 1 subunit (AP1G1), transcript variant 2, mRNA.	7	13	10	7	9	12	10	17	2	15	4	6.61157	6.62495	5.32725	8.57327	9.16674	7.26076	2.36141	10.7367	1.5266	11.1965	4.57875	13.6437	6.08	0.837379	0.610847	0
srna4560836	GTTGGAGGATGAAAGTACGGAGTGATCCAT	30	1	chr16	71792356	71792385	-	EXACT	refGene	NM_001030007	AP1G1	71762904	71842976	-	Homo sapiens adaptor-related protein complex 1, gamma 1 subunit (AP1G1), transcript variant 1, mRNA.	3	7	6	5		16	14	1	5	6	2	3.96694	0	3.80518	11.431	12.8334	6.40732	1.18071	5.7813	3.8165	4.47861	1.96232	0.802568	3.44389	0.537493	0.305393	0
srna4560836	GTTGGAGGATGAAAGTACGGAGTGATCCAT	30	1	chr16	71792356	71792385	-	EXACT	refGene	NM_001128	AP1G1	71762904	71842976	-	Homo sapiens adaptor-related protein complex 1, gamma 1 subunit (AP1G1), transcript variant 2, mRNA.	3	7	6	5		16	14	1	5	6	2	3.96694	0	3.80518	11.431	12.8334	6.40732	1.18071	5.7813	3.8165	4.47861	1.96232	0.802568	3.44389	0.537493	0.305393	0
srna5569937	TGGAGGATGAAAGTACGGAGTGATCCATCGGCTAAGTG	38	1	chr16	71792346	71792383	-	EXACT	refGene	NM_001030007	AP1G1	71762904	71842976	-	Homo sapiens adaptor-related protein complex 1, gamma 1 subunit (AP1G1), transcript variant 1, mRNA.	3	24	15	4	3	11	6	12	13	5	1	9.91736	2.20832	3.04414	7.85883	5.50005	5.70574	0.590354	19.8216	9.92291	3.73218	1.96232	9.63082	7.20587	1.26292	0.70972	0
srna5569937	TGGAGGATGAAAGTACGGAGTGATCCATCGGCTAAGTG	38	1	chr16	71792346	71792383	-	EXACT	refGene	NM_001128	AP1G1	71762904	71842976	-	Homo sapiens adaptor-related protein complex 1, gamma 1 subunit (AP1G1), transcript variant 2, mRNA.	3	24	15	4	3	11	6	12	13	5	1	9.91736	2.20832	3.04414	7.85883	5.50005	5.70574	0.590354	19.8216	9.92291	3.73218	1.96232	9.63082	7.20587	1.26292	0.70972	0
srna4560830	GTTGGAGGATGAAAGTACGGAGTGATCC	28	1	chr16	71792358	71792385	-	EXACT	refGene	NM_001030007	AP1G1	71762904	71842976	-	Homo sapiens adaptor-related protein complex 1, gamma 1 subunit (AP1G1), transcript variant 1, mRNA.	2	9	12	14		5	4	4	7	5		7.93388	0	10.6545	3.57219	3.6667	5.16545	0	7.4331	5.3431	3.73218	1.30822	3.21027	3.56332	0.689837	0.506575	0
srna4560830	GTTGGAGGATGAAAGTACGGAGTGATCC	28	1	chr16	71792358	71792385	-	EXACT	refGene	NM_001128	AP1G1	71762904	71842976	-	Homo sapiens adaptor-related protein complex 1, gamma 1 subunit (AP1G1), transcript variant 2, mRNA.	2	9	12	14		5	4	4	7	5		7.93388	0	10.6545	3.57219	3.6667	5.16545	0	7.4331	5.3431	3.73218	1.30822	3.21027	3.56332	0.689837	0.506575	0
srna4560768	GTTGGAGGATGAAAGTAC	18	1	chr16	71792368	71792385	-	EXACT	refGene	NM_001030007	AP1G1	71762904	71842976	-	Homo sapiens adaptor-related protein complex 1, gamma 1 subunit (AP1G1), transcript variant 1, mRNA.	3	19	9	13	4	1	3	12	7	3		5.95041	2.94442	9.89346	0.714439	2.75002	4.45055	0	15.6921	5.3431	2.23931	1.96232	9.63082	5.04737	1.1341	0.858695	0
srna4560768	GTTGGAGGATGAAAGTAC	18	1	chr16	71792368	71792385	-	EXACT	refGene	NM_001128	AP1G1	71762904	71842976	-	Homo sapiens adaptor-related protein complex 1, gamma 1 subunit (AP1G1), transcript variant 2, mRNA.	3	19	9	13	4	1	3	12	7	3		5.95041	2.94442	9.89346	0.714439	2.75002	4.45055	0	15.6921	5.3431	2.23931	1.96232	9.63082	5.04737	1.1341	0.858695	0
srna4560775	GTTGGAGGATGAAAGTACGG	20	1	chr16	71792366	71792385	-	EXACT	refGene	NM_001030007	AP1G1	71762904	71842976	-	Homo sapiens adaptor-related protein complex 1, gamma 1 subunit (AP1G1), transcript variant 1, mRNA.	1	12	5	5	4	9	4	2	8	4	2	3.30579	2.94442	3.80518	6.42995	3.6667	4.03041	1.18071	9.9108	6.1064	2.98574	0.654108	1.60514	4.16755	1.03403	0.94319	0
srna4560775	GTTGGAGGATGAAAGTACGG	20	1	chr16	71792366	71792385	-	EXACT	refGene	NM_001128	AP1G1	71762904	71842976	-	Homo sapiens adaptor-related protein complex 1, gamma 1 subunit (AP1G1), transcript variant 2, mRNA.	1	12	5	5	4	9	4	2	8	4	2	3.30579	2.94442	3.80518	6.42995	3.6667	4.03041	1.18071	9.9108	6.1064	2.98574	0.654108	1.60514	4.16755	1.03403	0.94319	0
srna6044954	TTGGAGGATGAAAGTACGGA	20	1	chr16	71792365	71792384	-	EXACT	refGene	NM_001030007	AP1G1	71762904	71842976	-	Homo sapiens adaptor-related protein complex 1, gamma 1 subunit (AP1G1), transcript variant 1, mRNA.	2	12	6	6	2	2	6	9	5	1	3	3.96694	1.47221	4.56621	1.42888	5.50005	3.38686	1.77106	9.9108	3.8165	0.746436	1.30822	7.22311	3.5106	1.03654	0.949568	0
srna6044954	TTGGAGGATGAAAGTACGGA	20	1	chr16	71792365	71792384	-	EXACT	refGene	NM_001128	AP1G1	71762904	71842976	-	Homo sapiens adaptor-related protein complex 1, gamma 1 subunit (AP1G1), transcript variant 2, mRNA.	2	12	6	6	2	2	6	9	5	1	3	3.96694	1.47221	4.56621	1.42888	5.50005	3.38686	1.77106	9.9108	3.8165	0.746436	1.30822	7.22311	3.5106	1.03654	0.949568	0
srna4560776	GTTGGAGGATGAAAGTACGGA	21	1	chr16	71792365	71792385	-	EXACT	refGene	NM_001030007	AP1G1	71762904	71842976	-	Homo sapiens adaptor-related protein complex 1, gamma 1 subunit (AP1G1), transcript variant 1, mRNA.	4	10	2	4	5	2	8	3	2	2	2	1.32231	3.68053	3.04414	1.42888	7.33339	3.36185	1.18071	8.259	1.5266	1.49287	2.61643	2.4077	3.01512	0.896864	0.845794	0
srna4560776	GTTGGAGGATGAAAGTACGGA	21	1	chr16	71792365	71792385	-	EXACT	refGene	NM_001128	AP1G1	71762904	71842976	-	Homo sapiens adaptor-related protein complex 1, gamma 1 subunit (AP1G1), transcript variant 2, mRNA.	4	10	2	4	5	2	8	3	2	2	2	1.32231	3.68053	3.04414	1.42888	7.33339	3.36185	1.18071	8.259	1.5266	1.49287	2.61643	2.4077	3.01512	0.896864	0.845794	0
srna5569933	TGGAGGATGAAAGTACGGAGTGATCCATCGGCTAAG	36	1	chr16	71792348	71792383	-	EXACT	refGene	NM_001030007	AP1G1	71762904	71842976	-	Homo sapiens adaptor-related protein complex 1, gamma 1 subunit (AP1G1), transcript variant 1, mRNA.	3	5	3	6	2	11	1	4	5	3	1	1.98347	1.47221	4.56621	7.85883	0.916674	3.35948	0.590354	4.1295	3.8165	2.23931	1.96232	3.21027	2.5476	0.758331	0.593781	0
srna5569933	TGGAGGATGAAAGTACGGAGTGATCCATCGGCTAAG	36	1	chr16	71792348	71792383	-	EXACT	refGene	NM_001128	AP1G1	71762904	71842976	-	Homo sapiens adaptor-related protein complex 1, gamma 1 subunit (AP1G1), transcript variant 2, mRNA.	3	5	3	6	2	11	1	4	5	3	1	1.98347	1.47221	4.56621	7.85883	0.916674	3.35948	0.590354	4.1295	3.8165	2.23931	1.96232	3.21027	2.5476	0.758331	0.593781	0
srna4560853	GTTGGAGGATGAAAGTACGGAGTGATCCATCGGCTAA	37	1	chr16	71792349	71792385	-	EXACT	refGene	NM_001030007	AP1G1	71762904	71842976	-	Homo sapiens adaptor-related protein complex 1, gamma 1 subunit (AP1G1), transcript variant 1, mRNA.	4	12	8	3	1	4	6	8	5	1		5.28926	0.736106	2.28311	2.85776	5.50005	3.33325	0	9.9108	3.8165	0.746436	2.61643	6.42055	3.41803	1.02543	0.967227	0
srna4560853	GTTGGAGGATGAAAGTACGGAGTGATCCATCGGCTAA	37	1	chr16	71792349	71792385	-	EXACT	refGene	NM_001128	AP1G1	71762904	71842976	-	Homo sapiens adaptor-related protein complex 1, gamma 1 subunit (AP1G1), transcript variant 2, mRNA.	4	12	8	3	1	4	6	8	5	1		5.28926	0.736106	2.28311	2.85776	5.50005	3.33325	0	9.9108	3.8165	0.746436	2.61643	6.42055	3.41803	1.02543	0.967227	0
srna6044953	TTGGAGGATGAAAGTACGG	19	1	chr16	71792366	71792384	-	EXACT	refGene	NM_001030007	AP1G1	71762904	71842976	-	Homo sapiens adaptor-related protein complex 1, gamma 1 subunit (AP1G1), transcript variant 1, mRNA.	1	22	5	4		5	6	2	2	4	1	3.30579	0	3.04414	3.57219	5.50005	3.08443	0.590354	18.1698	1.5266	2.98574	0.654108	1.60514	4.78532	1.55144	0.648385	0
srna6044953	TTGGAGGATGAAAGTACGG	19	1	chr16	71792366	71792384	-	EXACT	refGene	NM_001128	AP1G1	71762904	71842976	-	Homo sapiens adaptor-related protein complex 1, gamma 1 subunit (AP1G1), transcript variant 2, mRNA.	1	22	5	4		5	6	2	2	4	1	3.30579	0	3.04414	3.57219	5.50005	3.08443	0.590354	18.1698	1.5266	2.98574	0.654108	1.60514	4.78532	1.55144	0.648385	0
srna6045000	TTGGAGGATGAAAGTACGGAGTG	23	1	chr16	71792362	71792384	-	EXACT	refGene	NM_001030007	AP1G1	71762904	71842976	-	Homo sapiens adaptor-related protein complex 1, gamma 1 subunit (AP1G1), transcript variant 1, mRNA.		11	4	2		5	8	6	3	4	1	2.64463	0	1.52207	3.57219	7.33339	3.01446	0.590354	9.0849	2.2899	2.98574	0	4.81541	2.99018	0.991946	0.99079	0
srna6045000	TTGGAGGATGAAAGTACGGAGTG	23	1	chr16	71792362	71792384	-	EXACT	refGene	NM_001128	AP1G1	71762904	71842976	-	Homo sapiens adaptor-related protein complex 1, gamma 1 subunit (AP1G1), transcript variant 2, mRNA.		11	4	2		5	8	6	3	4	1	2.64463	0	1.52207	3.57219	7.33339	3.01446	0.590354	9.0849	2.2899	2.98574	0	4.81541	2.99018	0.991946	0.99079	0
srna6045049	TTGGAGGATGAAAGTACGGAGTGATCCATCGGC	33	1	chr16	71792352	71792384	-	EXACT	refGene	NM_001030007	AP1G1	71762904	71842976	-	Homo sapiens adaptor-related protein complex 1, gamma 1 subunit (AP1G1), transcript variant 1, mRNA.	5	11	5	2	1	5	4	7	7	7	4	3.30579	0.736106	1.52207	3.57219	3.6667	2.56057	2.36141	9.0849	5.3431	5.22505	3.27054	5.61798	5.057	1.97495	0.103976	0
srna6045049	TTGGAGGATGAAAGTACGGAGTGATCCATCGGC	33	1	chr16	71792352	71792384	-	EXACT	refGene	NM_001128	AP1G1	71762904	71842976	-	Homo sapiens adaptor-related protein complex 1, gamma 1 subunit (AP1G1), transcript variant 2, mRNA.	5	11	5	2	1	5	4	7	7	7	4	3.30579	0.736106	1.52207	3.57219	3.6667	2.56057	2.36141	9.0849	5.3431	5.22505	3.27054	5.61798	5.057	1.97495	0.103976	0
srna1504853	ATCGGCTAAGTGTCTTGTCACAATGCTGACACTCAAAC	38	1	chr16	71792320	71792357	-	EXACT	refGene	NM_001030007	AP1G1	71762904	71842976	-	Homo sapiens adaptor-related protein complex 1, gamma 1 subunit (AP1G1), transcript variant 1, mRNA.	6	22	5	7		3	2	6	15	14		3.30579	0	5.32725	2.14332	1.83335	2.52194	0	18.1698	11.4495	10.4501	3.92465	4.81541	8.79881	3.48891	0.117984	0
srna1504853	ATCGGCTAAGTGTCTTGTCACAATGCTGACACTCAAAC	38	1	chr16	71792320	71792357	-	EXACT	refGene	NM_001128	AP1G1	71762904	71842976	-	Homo sapiens adaptor-related protein complex 1, gamma 1 subunit (AP1G1), transcript variant 2, mRNA.	6	22	5	7		3	2	6	15	14		3.30579	0	5.32725	2.14332	1.83335	2.52194	0	18.1698	11.4495	10.4501	3.92465	4.81541	8.79881	3.48891	0.117984	0
srna2777997	CGGCTAAGTGTCTTGTCACAATGCTGACACTCAAACTGC	39	1	chr16	71792317	71792355	-	EXACT	refGene	NM_001030007	AP1G1	71762904	71842976	-	Homo sapiens adaptor-related protein complex 1, gamma 1 subunit (AP1G1), transcript variant 1, mRNA.	3	13	6	5		5	1	3	4	17	2	3.96694	0	3.80518	3.57219	0.916674	2.4522	1.18071	10.7367	3.0532	12.6894	1.96232	2.4077	5.92447	2.41598	0.230668	0
srna2777997	CGGCTAAGTGTCTTGTCACAATGCTGACACTCAAACTGC	39	1	chr16	71792317	71792355	-	EXACT	refGene	NM_001128	AP1G1	71762904	71842976	-	Homo sapiens adaptor-related protein complex 1, gamma 1 subunit (AP1G1), transcript variant 2, mRNA.	3	13	6	5		5	1	3	4	17	2	3.96694	0	3.80518	3.57219	0.916674	2.4522	1.18071	10.7367	3.0532	12.6894	1.96232	2.4077	5.92447	2.41598	0.230668	0
srna6045041	TTGGAGGATGAAAGTACGGAGTGATCCATCG	31	1	chr16	71792354	71792384	-	EXACT	refGene	NM_001030007	AP1G1	71762904	71842976	-	Homo sapiens adaptor-related protein complex 1, gamma 1 subunit (AP1G1), transcript variant 1, mRNA.		13	7	1		2	4	5	4	3		4.6281	0	0.761035	1.42888	3.6667	2.09694	0	10.7367	3.0532	2.23931	0	4.01284	3.20584	1.52882	0.628298	0
srna6045041	TTGGAGGATGAAAGTACGGAGTGATCCATCG	31	1	chr16	71792354	71792384	-	EXACT	refGene	NM_001128	AP1G1	71762904	71842976	-	Homo sapiens adaptor-related protein complex 1, gamma 1 subunit (AP1G1), transcript variant 2, mRNA.		13	7	1		2	4	5	4	3		4.6281	0	0.761035	1.42888	3.6667	2.09694	0	10.7367	3.0532	2.23931	0	4.01284	3.20584	1.52882	0.628298	0
srna5569936	TGGAGGATGAAAGTACGGAGTGATCCATCGGCTAAGT	37	1	chr16	71792347	71792383	-	EXACT	refGene	NM_001030007	AP1G1	71762904	71842976	-	Homo sapiens adaptor-related protein complex 1, gamma 1 subunit (AP1G1), transcript variant 1, mRNA.	3	10	2	3		1	2	3	1		1	1.32231	0	2.28311	0.714439	1.83335	1.23064	0.590354	8.259	0.763301	0	1.96232	2.4077	2.315	1.88113	0.523961	0
srna5569936	TGGAGGATGAAAGTACGGAGTGATCCATCGGCTAAGT	37	1	chr16	71792347	71792383	-	EXACT	refGene	NM_001128	AP1G1	71762904	71842976	-	Homo sapiens adaptor-related protein complex 1, gamma 1 subunit (AP1G1), transcript variant 2, mRNA.	3	10	2	3		1	2	3	1		1	1.32231	0	2.28311	0.714439	1.83335	1.23064	0.590354	8.259	0.763301	0	1.96232	2.4077	2.315	1.88113	0.523961	0
srna5513919	TGCTCAGCTCCCAGGTCACCCAGGAACTGAGGGCGCTGA	39	1	chr19	45411179	45411210	+	CLIPPED	refGene	NM_000041	APOE	45409038	45412650	+	Homo sapiens apolipoprotein E (APOE), mRNA.		10	1	3				2	1	1		0.661157	0	2.28311	0	0	0.588852	0	8.259	0.763301	0.746436	0	1.60514	1.95375	3.31789	0.447672	0
srna3104015	CTGCTCGCTGCGCCA	15	1	chr9	33447579	33447593	-	EXACT	refGene	NM_004925	AQP3	33441151	33447631	-	Homo sapiens aquaporin 3 (Gill blood group) (AQP3), mRNA.	164	23	29	39	192	79	72	30	36	27	80	19.1736	141.332	29.6804	56.4407	66.0006	62.5255	47.2283	18.9957	27.4788	20.1538	107.274	24.077	44.2261	0.707328	0.519886	0
srna416793	AAGGGGTCTGGACTCAAGCTTTCTGGAAAGCAGTCACAG	39	1	chr18	24442475	24442513	-	EXACT	refGene	NM_001650	AQP4	24432007	24445716	-	Homo sapiens aquaporin 4 (AQP4), transcript variant a, mRNA.		11	1	1		1		1		1		0.661157	0	0.761035	0.714439	0	0.427326	0	9.0849	0	0.746436	0	0.802568	1.96627	4.60133	0.438514	0
srna416793	AAGGGGTCTGGACTCAAGCTTTCTGGAAAGCAGTCACAG	39	1	chr18	24442475	24442513	-	EXACT	refGene	NM_004028	AQP4	24432007	24442575	-	Homo sapiens aquaporin 4 (AQP4), transcript variant b, mRNA.		11	1	1		1		1		1		0.661157	0	0.761035	0.714439	0	0.427326	0	9.0849	0	0.746436	0	0.802568	1.96627	4.60133	0.438514	0
srna5772679	TGTTCCTCTGTCTCCCAGACTCT	23	1	chr20	61918170	61918192	+	EXACT	refGene	NM_018209	ARFGAP1	61904164	61921142	+	Homo sapiens ADP-ribosylation factor GTPase activating protein 1 (ARFGAP1), transcript variant 1, mRNA.	14	10	10	8	5	7	5	7	6	6	6	6.61157	3.68053	6.08828	5.00107	4.58337	5.19296	3.54212	8.259	4.5798	4.47861	9.15751	5.61798	6.00341	1.15607	0.540319	0
srna5772679	TGTTCCTCTGTCTCCCAGACTCT	23	1	chr20	61918170	61918192	+	EXACT	refGene	NM_175609	ARFGAP1	61904164	61921142	+	Homo sapiens ADP-ribosylation factor GTPase activating protein 1 (ARFGAP1), transcript variant 2, mRNA.	14	10	10	8	5	7	5	7	6	6	6	6.61157	3.68053	6.08828	5.00107	4.58337	5.19296	3.54212	8.259	4.5798	4.47861	9.15751	5.61798	6.00341	1.15607	0.540319	0
srna315131	AAGAATTTTTCTCTGACC	18	1	chr4	106597835	106597852	-	EXACT	refGene	NM_001242729	ARHGEF38	106473776	106602070	+	Homo sapiens Rho guanine nucleotide exchange factor (GEF) 38 (ARHGEF38), transcript variant 1, mRNA.	11	1	23	16	5	4	3	13	1	4	2	15.2066	3.68053	12.1766	2.85776	2.75002	7.3343	1.18071	0.8259	0.763301	2.98574	7.19519	10.4334	2.59017	0.353158	0.157663	0
srna3229371	CTTGGCACCTAGCAAGCACTCA	22	1	chr5	175794963	175794984	+	EXACT	refGene	NM_173664	ARL10	175792501	175800503	+	Homo sapiens ADP-ribosylation factor-like 10 (ARL10), mRNA.	873	817	989	677	673	521	349	986	555	555	742	653.884	495.399	515.221	372.223	319.919	471.329	438.042	674.76	423.632	414.272	571.036	791.332	504.349	1.07006	0.682684	1
srna3229370	CTTGGCACCTAGCAAGCACTC	21	1	chr5	175794963	175794983	+	EXACT	refGene	NM_173664	ARL10	175792501	175800503	+	Homo sapiens ADP-ribosylation factor-like 10 (ARL10), mRNA.	659	606	583	444	388	259	225	784	365	367	535	385.455	285.609	337.9	185.04	206.252	280.051	315.839	500.496	278.605	273.942	431.057	629.213	359.988	1.28544	0.213829	1
srna3229361	CTTGGCACCTAGCAAGCACT	20	1	chr5	175794963	175794982	+	EXACT	refGene	NM_173664	ARL10	175792501	175800503	+	Homo sapiens ADP-ribosylation factor-like 10 (ARL10), mRNA.	232	216	222	244	197	140	114	301	126	117	146	146.777	145.013	185.693	100.021	104.501	136.401	86.1916	178.394	96.1759	87.333	151.753	241.573	119.97	0.879537	0.524347	1
srna6050736	TTGGCACCTAGCAAGCACTCA	21	1	chr5	175794964	175794984	+	EXACT	refGene	NM_173664	ARL10	175792501	175800503	+	Homo sapiens ADP-ribosylation factor-like 10 (ARL10), mRNA.	34	33	36	40	34	14	13	36	22	25	34	23.8017	25.0276	30.4414	10.0021	11.9168	20.2379	20.072	27.2547	16.7926	18.6609	22.2397	28.8925	21.004	1.03785	0.866424	0
srna6050735	TTGGCACCTAGCAAGCACTC	20	1	chr5	175794964	175794983	+	EXACT	refGene	NM_173664	ARL10	175792501	175800503	+	Homo sapiens ADP-ribosylation factor-like 10 (ARL10), mRNA.	35	34	28	27	26	11	22	38	14	16	22	18.5124	19.1388	20.5479	7.85883	20.1668	17.245	12.9878	28.0806	10.6862	11.943	22.8938	30.4976	17.3183	1.00425	0.986525	0
srna3229350	CTTGGCACCTAGCAAGCAC	19	1	chr5	175794963	175794981	+	EXACT	refGene	NM_173664	ARL10	175792501	175800503	+	Homo sapiens ADP-ribosylation factor-like 10 (ARL10), mRNA.	14	18	23	17	25	14	10	32	9	6	10	15.2066	18.4026	12.9376	10.0021	9.16674	13.1431	5.90354	14.8662	6.8697	4.47861	9.15751	25.6822	8.25511	0.628093	0.0852912	0
srna6050733	TTGGCACCTAGCAAGCACT	19	1	chr5	175794964	175794982	+	EXACT	refGene	NM_173664	ARL10	175792501	175800503	+	Homo sapiens ADP-ribosylation factor-like 10 (ARL10), mRNA.	16	16	16	21	12	14	6	24	8	7	15	10.5785	8.83327	15.9817	10.0021	5.50005	10.1791	8.8553	13.2144	6.1064	5.22505	10.4657	19.2616	8.77338	0.861898	0.547218	0
srna5589717	TGGCACCTAGCAAGCACTCA	20	1	chr5	175794965	175794984	+	EXACT	refGene	NM_173664	ARL10	175792501	175800503	+	Homo sapiens ADP-ribosylation factor-like 10 (ARL10), mRNA.	15	16	12	8	9	6	5	18	8	6	9	7.93388	6.62495	6.08828	4.28663	4.58337	5.90342	5.31318	13.2144	6.1064	4.47861	9.81162	14.4462	7.78484	1.3187	0.33307	0
srna4082012	GGCACCTAGCAAGCACTCA	19	1	chr5	175794966	175794984	+	EXACT	refGene	NM_173664	ARL10	175792501	175800503	+	Homo sapiens ADP-ribosylation factor-like 10 (ARL10), mRNA.	19	11	10	5	6	12	2	10	7	7	8	6.61157	4.41664	3.80518	8.57327	1.83335	5.048	4.72283	9.0849	5.3431	5.22505	12.428	8.02568	7.36079	1.45816	0.257645	0
srna5961656	TTCTCACTACTGCACTTGACTAGTA	25	1	chr11	13347423	13347447	-	EXACT	refGene	NM_001030272	ARNTL	13299324	13408812	+	Homo sapiens aryl hydrocarbon receptor nuclear translocator-like (ARNTL), transcript variant 2, mRNA.	10	14	13	14	17	11	23	25	19	4	2	8.59504	12.5138	10.6545	7.85883	21.0835	12.1411	1.18071	11.5626	14.5027	2.98574	6.54108	20.0642	7.35457	0.605756	0.204427	0
srna5961656	TTCTCACTACTGCACTTGACTAGTA	25	1	chr11	13347423	13347447	-	EXACT	refGene	NM_001030273	ARNTL	13299324	13408812	+	Homo sapiens aryl hydrocarbon receptor nuclear translocator-like (ARNTL), transcript variant 3, mRNA.	10	14	13	14	17	11	23	25	19	4	2	8.59504	12.5138	10.6545	7.85883	21.0835	12.1411	1.18071	11.5626	14.5027	2.98574	6.54108	20.0642	7.35457	0.605756	0.204427	0
srna5961656	TTCTCACTACTGCACTTGACTAGTA	25	1	chr11	13347423	13347447	-	EXACT	refGene	NM_001178	ARNTL	13299324	13408812	+	Homo sapiens aryl hydrocarbon receptor nuclear translocator-like (ARNTL), transcript variant 1, mRNA.	10	14	13	14	17	11	23	25	19	4	2	8.59504	12.5138	10.6545	7.85883	21.0835	12.1411	1.18071	11.5626	14.5027	2.98574	6.54108	20.0642	7.35457	0.605756	0.204427	0
srna3209785	CTTCTCACTACTGCACTTGACTAGTA	26	1	chr11	13347423	13347448	-	EXACT	refGene	NM_001030272	ARNTL	13299324	13408812	+	Homo sapiens aryl hydrocarbon receptor nuclear translocator-like (ARNTL), transcript variant 2, mRNA.	3	17	17	11	8	6	21	25	11		4	11.2397	5.88885	8.37139	4.28663	19.2502	9.80734	2.36141	14.0403	8.39631	0	1.96232	20.0642	5.35207	0.545721	0.26228	0
srna3209785	CTTCTCACTACTGCACTTGACTAGTA	26	1	chr11	13347423	13347448	-	EXACT	refGene	NM_001030273	ARNTL	13299324	13408812	+	Homo sapiens aryl hydrocarbon receptor nuclear translocator-like (ARNTL), transcript variant 3, mRNA.	3	17	17	11	8	6	21	25	11		4	11.2397	5.88885	8.37139	4.28663	19.2502	9.80734	2.36141	14.0403	8.39631	0	1.96232	20.0642	5.35207	0.545721	0.26228	0
srna3209785	CTTCTCACTACTGCACTTGACTAGTA	26	1	chr11	13347423	13347448	-	EXACT	refGene	NM_001178	ARNTL	13299324	13408812	+	Homo sapiens aryl hydrocarbon receptor nuclear translocator-like (ARNTL), transcript variant 1, mRNA.	3	17	17	11	8	6	21	25	11		4	11.2397	5.88885	8.37139	4.28663	19.2502	9.80734	2.36141	14.0403	8.39631	0	1.96232	20.0642	5.35207	0.545721	0.26228	0
srna4980998	TCACAGTGAACCGGTCTCTTTC	22	1	chr3	35786019	35786040	+	EXACT	refGene	NM_016300	ARPP21	35683848	35835988	+	Homo sapiens cAMP-regulated phosphoprotein, 21kDa (ARPP21), transcript variant 1, mRNA.	2070	1176	3117	2257	2462	1573	1474	2258	2323	2066	2007	2060.83	1812.29	1717.66	1123.81	1351.18	1613.15	1184.84	971.259	1773.15	1542.14	1354	1812.2	1365.08	0.846217	0.28776	1
srna1851574	CACAGTGAACCGGTCTCTTTC	21	1	chr3	35786020	35786040	+	EXACT	refGene	NM_016300	ARPP21	35683848	35835988	+	Homo sapiens cAMP-regulated phosphoprotein, 21kDa (ARPP21), transcript variant 1, mRNA.	109	67	139	108	113	77	87	142	87	107	105	91.9008	83.18	82.1918	55.0118	79.7507	78.407	61.9871	55.3353	66.4071	79.8686	71.2977	113.965	66.9792	0.85425	0.169608	0
srna636100	ACAGTGAACCGGTCTCTTTC	20	1	chr3	35786021	35786040	+	EXACT	refGene	NM_016300	ARPP21	35683848	35835988	+	Homo sapiens cAMP-regulated phosphoprotein, 21kDa (ARPP21), transcript variant 1, mRNA.	26	23	47	29	40	23	27	25	21	25	25	31.0744	29.4442	22.07	16.4321	24.7502	24.7542	14.7588	18.9957	16.0293	18.6609	17.0068	20.0642	17.0903	0.690401	0.0409793	0
srna4981040	TCACAGTGAACCGGTCTCTTTCC	23	1	chr3	35786019	35786041	+	EXACT	refGene	NM_016300	ARPP21	35683848	35835988	+	Homo sapiens cAMP-regulated phosphoprotein, 21kDa (ARPP21), transcript variant 1, mRNA.	36	9	39	26	36	24	29	38	38	36	24	25.7851	26.4998	19.7869	17.1465	26.5836	23.1604	14.1685	7.4331	29.0054	26.8717	23.5479	30.4976	20.2053	0.872408	0.53908	0
srna2076086	CAGTGAACCGGTCTCTTTC	19	1	chr3	35786022	35786040	+	EXACT	refGene	NM_016300	ARPP21	35683848	35835988	+	Homo sapiens cAMP-regulated phosphoprotein, 21kDa (ARPP21), transcript variant 1, mRNA.	27	8	34	40	26	24	11	24	34	26	24	22.4793	19.1388	30.4414	17.1465	10.0834	19.8579	14.1685	6.6072	25.9522	19.4073	17.6609	19.2616	16.7592	0.843958	0.520154	0
srna4216826	GGGGGCCGATACACTGTACGAGA	23	1	chr3	35785982	35786004	+	EXACT	refGene	NM_016300	ARPP21	35683848	35835988	+	Homo sapiens cAMP-regulated phosphoprotein, 21kDa (ARPP21), transcript variant 1, mRNA.	18	18	49	19	16	9	11	27	30	37	21	32.3967	11.7777	14.4597	6.42995	10.0834	15.0295	12.3974	14.8662	22.899	27.6181	11.7739	21.6693	17.9109	1.19172	0.616949	0
srna1333599	AGTGAACCGGTCTCTTTC	18	1	chr3	35786023	35786040	+	EXACT	refGene	NM_016300	ARPP21	35683848	35835988	+	Homo sapiens cAMP-regulated phosphoprotein, 21kDa (ARPP21), transcript variant 1, mRNA.	13	1	8	11	6	6	5	5	3	5	6	5.28926	4.41664	8.37139	4.28663	4.58337	5.38946	3.54212	0.8259	2.2899	3.73218	8.5034	4.01284	3.7787	0.701128	0.321268	0
srna4216825	GGGGGCCGATACACTGTACGAG	22	1	chr3	35785982	35786003	+	EXACT	refGene	NM_016300	ARPP21	35683848	35835988	+	Homo sapiens cAMP-regulated phosphoprotein, 21kDa (ARPP21), transcript variant 1, mRNA.	5	5	7	1	3	1	5	10	3	2	7	4.6281	2.20832	0.761035	0.714439	4.58337	2.57905	4.13248	4.1295	2.2899	1.49287	3.27054	8.02568	3.06306	1.18767	0.648374	0
srna2519145	CCTCTGGGCCCTTCCTCCAG	20	1	chr11	75046152	75046171	-	EXACT	refGene	NM_004041	ARRB1	74971165	75062875	-	Homo sapiens arrestin, beta 1 (ARRB1), transcript variant 1, mRNA.	16	15	26	40	34	15	14	18	23	12	12	17.1901	25.0276	30.4414	10.7166	12.8334	19.2418	7.08424	12.3885	17.5559	8.95723	10.4657	14.4462	11.2903	0.58676	0.104507	0
srna2519145	CCTCTGGGCCCTTCCTCCAG	20	1	chr11	75046152	75046171	-	EXACT	refGene	NM_020251	ARRB1	74971165	75062875	-	Homo sapiens arrestin, beta 1 (ARRB1), transcript variant 2, mRNA.	16	15	26	40	34	15	14	18	23	12	12	17.1901	25.0276	30.4414	10.7166	12.8334	19.2418	7.08424	12.3885	17.5559	8.95723	10.4657	14.4462	11.2903	0.58676	0.104507	0
srna581262	ACAATACTGTGATAACTGA	19	1	chr5	94920142	94920160	+	EXACT	refGene	NM_198150	ARSK	94890824	94940806	+	Homo sapiens arylsulfatase family, member K (ARSK), mRNA.	10	7	6	4	3	5	5	2	5	3	2	3.96694	2.20832	3.04414	3.57219	4.58337	3.47499	1.18071	5.7813	3.8165	2.23931	6.54108	1.60514	3.91178	1.12569	0.705514	0
srna5089627	TCCCCCCACTGCTAAATTTGACTGGCTT	28	1	chr11	3685048	3685075	-	EXACT	refGene	NM_004314	ART1	3666360	3685646	+	Homo sapiens ADP-ribosyltransferase 1 (ART1), mRNA.	8	6	16	3	8	19	9	9	10	8	13	10.5785	5.88885	2.28311	13.5743	8.25007	8.11497	7.6746	4.9554	7.63301	5.97149	5.23286	7.22311	6.29347	0.775538	0.410837	0
srna1355543	AGTGTTACAGCCCCCCCACTGCTAAATTTGACTGGCTT	38	1	chr11	3685048	3685074	-	CLIPPED	refGene	NM_004314	ART1	3666360	3685646	+	Homo sapiens ADP-ribosyltransferase 1 (ART1), mRNA.	4	2	2	2	2	5	5	3	3		13	1.32231	1.47221	1.52207	3.57219	4.58337	2.49443	7.6746	1.6518	2.2899	0	2.61643	2.4077	2.84655	1.14116	0.816313	0
srna1870344	CACCCCGCGCCCTCTCTCTCTCTCTCTCCCCCCCTCCCC	39	1	chr8	131083220	131083249	-	CLIPPED	refGene	NM_001247996	ASAP1	131064350	131455906	-	Homo sapiens ArfGAP with SH3 domain, ankyrin repeat and PH domain 1 (ASAP1), transcript variant 2, mRNA.	3	3	2	3	1	19	6	1	3	5		1.32231	0.736106	2.28311	13.5743	5.50005	4.68318	0	2.4777	2.2899	3.73218	1.96232	0.802568	2.09242	0.446795	0.342795	0
srna1870344	CACCCCGCGCCCTCTCTCTCTCTCTCTCCCCCCCTCCCC	39	1	chr8	131083220	131083249	-	CLIPPED	refGene	NM_018482	ASAP1	131064350	131455906	-	Homo sapiens ArfGAP with SH3 domain, ankyrin repeat and PH domain 1 (ASAP1), transcript variant 1, mRNA.	3	3	2	3	1	19	6	1	3	5		1.32231	0.736106	2.28311	13.5743	5.50005	4.68318	0	2.4777	2.2899	3.73218	1.96232	0.802568	2.09242	0.446795	0.342795	0
srna5989222	TTGAAAGGCTATTTCTTGGTC	21	1	chr1	176998510	176998530	-	EXACT	refGene	NM_004319	ASTN1	176830202	177134024	-	Homo sapiens astrotactin 1 (ASTN1), transcript variant 1, mRNA.	286	137	278	292	717	329	405	328	220	317	127	183.802	527.788	222.222	235.05	371.253	308.023	74.9749	113.148	167.926	236.62	187.075	263.242	155.949	0.50629	0.0748639	1
srna5989222	TTGAAAGGCTATTTCTTGGTC	21	1	chr1	176998510	176998530	-	EXACT	refGene	NM_207108	ASTN1	176837953	177134024	-	Homo sapiens astrotactin 1 (ASTN1), transcript variant 2, mRNA.	286	137	278	292	717	329	405	328	220	317	127	183.802	527.788	222.222	235.05	371.253	308.023	74.9749	113.148	167.926	236.62	187.075	263.242	155.949	0.50629	0.0748639	1
srna5989206	TTGAAAGGCTATTTCTTGGT	20	1	chr1	176998511	176998530	-	EXACT	refGene	NM_004319	ASTN1	176830202	177134024	-	Homo sapiens astrotactin 1 (ASTN1), transcript variant 1, mRNA.	124	134	141	128	163	91	119	136	136	139	108	93.2231	119.985	97.4125	65.0139	109.084	96.9438	63.7582	110.671	103.809	103.755	81.1094	109.149	92.6203	0.955402	0.743332	0
srna5989206	TTGAAAGGCTATTTCTTGGT	20	1	chr1	176998511	176998530	-	EXACT	refGene	NM_207108	ASTN1	176837953	177134024	-	Homo sapiens astrotactin 1 (ASTN1), transcript variant 2, mRNA.	124	134	141	128	163	91	119	136	136	139	108	93.2231	119.985	97.4125	65.0139	109.084	96.9438	63.7582	110.671	103.809	103.755	81.1094	109.149	92.6203	0.955402	0.743332	0
srna2284927	CCCAGATAATGGCACTCTCAAAC	23	1	chr1	176998546	176998568	-	EXACT	refGene	NM_004319	ASTN1	176830202	177134024	-	Homo sapiens astrotactin 1 (ASTN1), transcript variant 1, mRNA.	131	65	167	103	61	42	57	99	113	142	132	110.413	44.9025	78.3866	30.0064	52.2504	63.1918	77.9267	53.6835	86.253	105.994	85.6881	79.4543	81.909	1.2962	0.29648	0
srna2284927	CCCAGATAATGGCACTCTCAAAC	23	1	chr1	176998546	176998568	-	EXACT	refGene	NM_207108	ASTN1	176837953	177134024	-	Homo sapiens astrotactin 1 (ASTN1), transcript variant 2, mRNA.	131	65	167	103	61	42	57	99	113	142	132	110.413	44.9025	78.3866	30.0064	52.2504	63.1918	77.9267	53.6835	86.253	105.994	85.6881	79.4543	81.909	1.2962	0.29648	0
srna6175380	TTTGAAAGGCTATTTCTTGGT	21	1	chr1	176998511	176998531	-	EXACT	refGene	NM_004319	ASTN1	176830202	177134024	-	Homo sapiens astrotactin 1 (ASTN1), transcript variant 1, mRNA.	49	56	77	62	65	39	54	68	58	54	47	50.9091	47.8469	47.1842	27.8631	49.5004	44.6607	27.7466	46.2504	44.2714	40.3075	32.0513	54.5746	38.1255	0.853668	0.273207	0
srna6175380	TTTGAAAGGCTATTTCTTGGT	21	1	chr1	176998511	176998531	-	EXACT	refGene	NM_207108	ASTN1	176837953	177134024	-	Homo sapiens astrotactin 1 (ASTN1), transcript variant 2, mRNA.	49	56	77	62	65	39	54	68	58	54	47	50.9091	47.8469	47.1842	27.8631	49.5004	44.6607	27.7466	46.2504	44.2714	40.3075	32.0513	54.5746	38.1255	0.853668	0.273207	0
srna6175388	TTTGAAAGGCTATTTCTTGGTC	22	1	chr1	176998510	176998531	-	EXACT	refGene	NM_004319	ASTN1	176830202	177134024	-	Homo sapiens astrotactin 1 (ASTN1), transcript variant 1, mRNA.	44	25	50	48	106	44	47	59	35	61	23	33.0579	78.0272	36.5297	31.4353	43.0837	44.4268	13.5781	20.6475	26.7155	45.5326	28.7807	47.3515	27.0509	0.608888	0.13268	0
srna6175388	TTTGAAAGGCTATTTCTTGGTC	22	1	chr1	176998510	176998531	-	EXACT	refGene	NM_207108	ASTN1	176837953	177134024	-	Homo sapiens astrotactin 1 (ASTN1), transcript variant 2, mRNA.	44	25	50	48	106	44	47	59	35	61	23	33.0579	78.0272	36.5297	31.4353	43.0837	44.4268	13.5781	20.6475	26.7155	45.5326	28.7807	47.3515	27.0509	0.608888	0.13268	0
srna2284922	CCCAGATAATGGCACTCTCAA	21	1	chr1	176998548	176998568	-	EXACT	refGene	NM_004319	ASTN1	176830202	177134024	-	Homo sapiens astrotactin 1 (ASTN1), transcript variant 1, mRNA.	60	29	74	46	28	21	26	41	54	56	49	48.9256	20.611	35.0076	15.0032	23.8335	28.6762	28.9273	23.9511	41.2182	41.8004	39.2465	32.9053	35.0287	1.22153	0.39797	0
srna2284922	CCCAGATAATGGCACTCTCAA	21	1	chr1	176998548	176998568	-	EXACT	refGene	NM_207108	ASTN1	176837953	177134024	-	Homo sapiens astrotactin 1 (ASTN1), transcript variant 2, mRNA.	60	29	74	46	28	21	26	41	54	56	49	48.9256	20.611	35.0076	15.0032	23.8335	28.6762	28.9273	23.9511	41.2182	41.8004	39.2465	32.9053	35.0287	1.22153	0.39797	0
srna5989190	TTGAAAGGCTATTTCTTGG	19	1	chr1	176998512	176998530	-	EXACT	refGene	NM_004319	ASTN1	176830202	177134024	-	Homo sapiens astrotactin 1 (ASTN1), transcript variant 1, mRNA.	24	16	35	26	41	27	23	22	24	35	16	23.1405	30.1803	19.7869	19.2898	21.0835	22.6962	9.44566	13.2144	18.3192	26.1253	15.6986	17.6565	16.5606	0.729664	0.11602	0
srna5989190	TTGAAAGGCTATTTCTTGG	19	1	chr1	176998512	176998530	-	EXACT	refGene	NM_207108	ASTN1	176837953	177134024	-	Homo sapiens astrotactin 1 (ASTN1), transcript variant 2, mRNA.	24	16	35	26	41	27	23	22	24	35	16	23.1405	30.1803	19.7869	19.2898	21.0835	22.6962	9.44566	13.2144	18.3192	26.1253	15.6986	17.6565	16.5606	0.729664	0.11602	0
srna2284921	CCCAGATAATGGCACTCTCA	20	1	chr1	176998549	176998568	-	EXACT	refGene	NM_004319	ASTN1	176830202	177134024	-	Homo sapiens astrotactin 1 (ASTN1), transcript variant 1, mRNA.	46	36	64	37	15	20	18	39	37	41	41	42.314	11.0416	28.1583	14.2888	16.5001	22.4606	24.2045	29.7324	28.2421	30.6039	30.089	31.3002	28.5744	1.2722	0.351394	0
srna2284921	CCCAGATAATGGCACTCTCA	20	1	chr1	176998549	176998568	-	EXACT	refGene	NM_207108	ASTN1	176837953	177134024	-	Homo sapiens astrotactin 1 (ASTN1), transcript variant 2, mRNA.	46	36	64	37	15	20	18	39	37	41	41	42.314	11.0416	28.1583	14.2888	16.5001	22.4606	24.2045	29.7324	28.2421	30.6039	30.089	31.3002	28.5744	1.2722	0.351394	0
srna2284923	CCCAGATAATGGCACTCTCAAA	22	1	chr1	176998547	176998568	-	EXACT	refGene	NM_004319	ASTN1	176830202	177134024	-	Homo sapiens astrotactin 1 (ASTN1), transcript variant 1, mRNA.	29	24	63	33	15	17	15	22	35	42	29	41.6529	11.0416	25.1142	12.1455	13.7501	20.7408	17.1203	19.8216	26.7155	31.3503	18.9691	17.6565	22.7954	1.09906	0.75952	0
srna2284923	CCCAGATAATGGCACTCTCAAA	22	1	chr1	176998547	176998568	-	EXACT	refGene	NM_207108	ASTN1	176837953	177134024	-	Homo sapiens astrotactin 1 (ASTN1), transcript variant 2, mRNA.	29	24	63	33	15	17	15	22	35	42	29	41.6529	11.0416	25.1142	12.1455	13.7501	20.7408	17.1203	19.8216	26.7155	31.3503	18.9691	17.6565	22.7954	1.09906	0.75952	0
srna5333353	TGAAAGGCTATTTCTTGGTC	20	1	chr1	176998510	176998529	-	EXACT	refGene	NM_004319	ASTN1	176830202	177134024	-	Homo sapiens astrotactin 1 (ASTN1), transcript variant 1, mRNA.	17	6	16	11	45	16	27	22	11	13	7	10.5785	33.1248	8.37139	11.431	24.7502	17.6512	4.13248	4.9554	8.39631	9.70366	11.1198	17.6565	7.66154	0.434052	0.107132	0
srna5333353	TGAAAGGCTATTTCTTGGTC	20	1	chr1	176998510	176998529	-	EXACT	refGene	NM_207108	ASTN1	176837953	177134024	-	Homo sapiens astrotactin 1 (ASTN1), transcript variant 2, mRNA.	17	6	16	11	45	16	27	22	11	13	7	10.5785	33.1248	8.37139	11.431	24.7502	17.6512	4.13248	4.9554	8.39631	9.70366	11.1198	17.6565	7.66154	0.434052	0.107132	0
srna5989223	TTGAAAGGCTATTTCTTGGTCA	22	1	chr1	176998509	176998530	-	EXACT	refGene	NM_004319	ASTN1	176830202	177134024	-	Homo sapiens astrotactin 1 (ASTN1), transcript variant 1, mRNA.	25	14	21	8	28	27	21	13	12	12	14	13.8843	20.611	6.08828	19.2898	19.2502	15.8247	8.26495	11.5626	9.15961	8.95723	16.3527	10.4334	10.8594	0.686232	0.155784	0
srna5989223	TTGAAAGGCTATTTCTTGGTCA	22	1	chr1	176998509	176998530	-	EXACT	refGene	NM_207108	ASTN1	176837953	177134024	-	Homo sapiens astrotactin 1 (ASTN1), transcript variant 2, mRNA.	25	14	21	8	28	27	21	13	12	12	14	13.8843	20.611	6.08828	19.2898	19.2502	15.8247	8.26495	11.5626	9.15961	8.95723	16.3527	10.4334	10.8594	0.686232	0.155784	0
srna5989185	TTGAAAGGCTATTTCTTG	18	1	chr1	176998513	176998530	-	EXACT	refGene	NM_004319	ASTN1	176830202	177134024	-	Homo sapiens astrotactin 1 (ASTN1), transcript variant 1, mRNA.	5	9	17	10	16	6	9	7	7	10	2	11.2397	11.7777	7.61035	4.28663	8.25007	8.63288	1.18071	7.4331	5.3431	7.46436	3.27054	5.61798	4.93836	0.572041	0.0776115	0
srna5989185	TTGAAAGGCTATTTCTTG	18	1	chr1	176998513	176998530	-	EXACT	refGene	NM_207108	ASTN1	176837953	177134024	-	Homo sapiens astrotactin 1 (ASTN1), transcript variant 2, mRNA.	5	9	17	10	16	6	9	7	7	10	2	11.2397	11.7777	7.61035	4.28663	8.25007	8.63288	1.18071	7.4331	5.3431	7.46436	3.27054	5.61798	4.93836	0.572041	0.0776115	0
srna6175374	TTTGAAAGGCTATTTCTTGG	20	1	chr1	176998512	176998531	-	EXACT	refGene	NM_004319	ASTN1	176830202	177134024	-	Homo sapiens astrotactin 1 (ASTN1), transcript variant 1, mRNA.	6	11	13	11	10	11	7	5	7	10	13	8.59504	7.36106	8.37139	7.85883	6.41672	7.72061	7.6746	9.0849	5.3431	7.46436	3.92465	4.01284	6.69832	0.86759	0.348021	0
srna6175374	TTTGAAAGGCTATTTCTTGG	20	1	chr1	176998512	176998531	-	EXACT	refGene	NM_207108	ASTN1	176837953	177134024	-	Homo sapiens astrotactin 1 (ASTN1), transcript variant 2, mRNA.	6	11	13	11	10	11	7	5	7	10	13	8.59504	7.36106	8.37139	7.85883	6.41672	7.72061	7.6746	9.0849	5.3431	7.46436	3.92465	4.01284	6.69832	0.86759	0.348021	0
srna5333346	TGAAAGGCTATTTCTTGGT	19	1	chr1	176998511	176998529	-	EXACT	refGene	NM_004319	ASTN1	176830202	177134024	-	Homo sapiens astrotactin 1 (ASTN1), transcript variant 1, mRNA.	6	8	3	10	15	4	5	13	6	12	10	1.98347	11.0416	7.61035	2.85776	4.58337	5.61531	5.90354	6.6072	4.5798	8.95723	3.92465	10.4334	5.99448	1.06753	0.846792	0
srna5333346	TGAAAGGCTATTTCTTGGT	19	1	chr1	176998511	176998529	-	EXACT	refGene	NM_207108	ASTN1	176837953	177134024	-	Homo sapiens astrotactin 1 (ASTN1), transcript variant 2, mRNA.	6	8	3	10	15	4	5	13	6	12	10	1.98347	11.0416	7.61035	2.85776	4.58337	5.61531	5.90354	6.6072	4.5798	8.95723	3.92465	10.4334	5.99448	1.06753	0.846792	0
srna2223418	CCAGATAATGGCACTCTCAAAC	22	1	chr1	176998546	176998567	-	EXACT	refGene	NM_004319	ASTN1	176830202	177134024	-	Homo sapiens astrotactin 1 (ASTN1), transcript variant 1, mRNA.	13	8	16	8	5	3	5	11	11	7	11	10.5785	3.68053	6.08828	2.14332	4.58337	5.4148	6.49389	6.6072	8.39631	5.22505	8.5034	8.82825	7.04517	1.30109	0.342877	0
srna2223418	CCAGATAATGGCACTCTCAAAC	22	1	chr1	176998546	176998567	-	EXACT	refGene	NM_207108	ASTN1	176837953	177134024	-	Homo sapiens astrotactin 1 (ASTN1), transcript variant 2, mRNA.	13	8	16	8	5	3	5	11	11	7	11	10.5785	3.68053	6.08828	2.14332	4.58337	5.4148	6.49389	6.6072	8.39631	5.22505	8.5034	8.82825	7.04517	1.30109	0.342877	0
srna2284928	CCCAGATAATGGCACTCTCAAACA	24	1	chr1	176998545	176998568	-	EXACT	refGene	NM_004319	ASTN1	176830202	177134024	-	Homo sapiens astrotactin 1 (ASTN1), transcript variant 1, mRNA.	8	5	18	8	2	1	3	3	9	11	7	11.9008	1.47221	6.08828	0.714439	2.75002	4.58516	4.13248	4.1295	6.8697	8.21079	5.23286	2.4077	5.71507	1.24643	0.628337	0
srna2284928	CCCAGATAATGGCACTCTCAAACA	24	1	chr1	176998545	176998568	-	EXACT	refGene	NM_207108	ASTN1	176837953	177134024	-	Homo sapiens astrotactin 1 (ASTN1), transcript variant 2, mRNA.	8	5	18	8	2	1	3	3	9	11	7	11.9008	1.47221	6.08828	0.714439	2.75002	4.58516	4.13248	4.1295	6.8697	8.21079	5.23286	2.4077	5.71507	1.24643	0.628337	0
srna6175389	TTTGAAAGGCTATTTCTTGGTCA	23	1	chr1	176998509	176998531	-	EXACT	refGene	NM_004319	ASTN1	176830202	177134024	-	Homo sapiens astrotactin 1 (ASTN1), transcript variant 1, mRNA.	2	4	6	3	11	2	1	4	4	1	1	3.96694	8.09717	2.28311	1.42888	0.916674	3.33855	0.590354	3.3036	3.0532	0.746436	1.30822	3.21027	1.80036	0.539264	0.323648	0
srna6175389	TTTGAAAGGCTATTTCTTGGTCA	23	1	chr1	176998509	176998531	-	EXACT	refGene	NM_207108	ASTN1	176837953	177134024	-	Homo sapiens astrotactin 1 (ASTN1), transcript variant 2, mRNA.	2	4	6	3	11	2	1	4	4	1	1	3.96694	8.09717	2.28311	1.42888	0.916674	3.33855	0.590354	3.3036	3.0532	0.746436	1.30822	3.21027	1.80036	0.539264	0.323648	0
srna2284920	CCCAGATAATGGCACTCTC	19	1	chr1	176998550	176998568	-	EXACT	refGene	NM_004319	ASTN1	176830202	177134024	-	Homo sapiens astrotactin 1 (ASTN1), transcript variant 1, mRNA.	5	3	5	5	1	2		12	8	13	9	3.30579	0.736106	3.80518	1.42888	0	1.85519	5.31318	2.4777	6.1064	9.70366	3.27054	9.63082	5.3743	2.8969	0.0504061	0
srna2284920	CCCAGATAATGGCACTCTC	19	1	chr1	176998550	176998568	-	EXACT	refGene	NM_207108	ASTN1	176837953	177134024	-	Homo sapiens astrotactin 1 (ASTN1), transcript variant 2, mRNA.	5	3	5	5	1	2		12	8	13	9	3.30579	0.736106	3.80518	1.42888	0	1.85519	5.31318	2.4777	6.1064	9.70366	3.27054	9.63082	5.3743	2.8969	0.0504061	0
srna4481450	GTGGCTATGATCTGCCTTGTTCAAGCTGAGACCT	34	1	chr2	234197554	234197587	+	EXACT	refGene	NM_001190266	ATG16L1	234160216	234204320	+	Homo sapiens ATG16 autophagy related 16-like 1 (S. cerevisiae) (ATG16L1), transcript variant 4, mRNA.	10	48	46	22	11	6	26	29	22	9	3	30.4132	8.09717	16.7428	4.28663	23.8335	16.6747	1.77106	39.6432	16.7926	6.71792	6.54108	23.2745	14.2932	0.857179	0.783169	0
srna4481450	GTGGCTATGATCTGCCTTGTTCAAGCTGAGACCT	34	1	chr2	234197554	234197587	+	EXACT	refGene	NM_001190267	ATG16L1	234160216	234204320	+	Homo sapiens ATG16 autophagy related 16-like 1 (S. cerevisiae) (ATG16L1), transcript variant 5, mRNA.	10	48	46	22	11	6	26	29	22	9	3	30.4132	8.09717	16.7428	4.28663	23.8335	16.6747	1.77106	39.6432	16.7926	6.71792	6.54108	23.2745	14.2932	0.857179	0.783169	0
srna4481450	GTGGCTATGATCTGCCTTGTTCAAGCTGAGACCT	34	1	chr2	234197554	234197587	+	EXACT	refGene	NM_017974	ATG16L1	234160216	234204320	+	Homo sapiens ATG16 autophagy related 16-like 1 (S. cerevisiae) (ATG16L1), transcript variant 2, mRNA.	10	48	46	22	11	6	26	29	22	9	3	30.4132	8.09717	16.7428	4.28663	23.8335	16.6747	1.77106	39.6432	16.7926	6.71792	6.54108	23.2745	14.2932	0.857179	0.783169	0
srna4481450	GTGGCTATGATCTGCCTTGTTCAAGCTGAGACCT	34	1	chr2	234197554	234197587	+	EXACT	refGene	NM_030803	ATG16L1	234160216	234204320	+	Homo sapiens ATG16 autophagy related 16-like 1 (S. cerevisiae) (ATG16L1), transcript variant 1, mRNA.	10	48	46	22	11	6	26	29	22	9	3	30.4132	8.09717	16.7428	4.28663	23.8335	16.6747	1.77106	39.6432	16.7926	6.71792	6.54108	23.2745	14.2932	0.857179	0.783169	0
srna4481450	GTGGCTATGATCTGCCTTGTTCAAGCTGAGACCT	34	1	chr2	234197554	234197587	+	EXACT	refGene	NM_198890	ATG16L1	234160216	234204320	+	Homo sapiens ATG16 autophagy related 16-like 1 (S. cerevisiae) (ATG16L1), transcript variant 3, mRNA.	10	48	46	22	11	6	26	29	22	9	3	30.4132	8.09717	16.7428	4.28663	23.8335	16.6747	1.77106	39.6432	16.7926	6.71792	6.54108	23.2745	14.2932	0.857179	0.783169	0
srna5611314	TGGCTATGATCTGCCTTGTTCAAGCTGAGACCT	33	1	chr2	234197555	234197587	+	EXACT	refGene	NM_001190266	ATG16L1	234160216	234204320	+	Homo sapiens ATG16 autophagy related 16-like 1 (S. cerevisiae) (ATG16L1), transcript variant 4, mRNA.	19	25	38	28	8	15	14	31	21	12	5	25.124	5.88885	21.309	10.7166	12.8334	15.1744	2.95177	20.6475	16.0293	8.95723	12.428	24.8796	12.2028	0.80417	0.540087	0
srna5611314	TGGCTATGATCTGCCTTGTTCAAGCTGAGACCT	33	1	chr2	234197555	234197587	+	EXACT	refGene	NM_001190267	ATG16L1	234160216	234204320	+	Homo sapiens ATG16 autophagy related 16-like 1 (S. cerevisiae) (ATG16L1), transcript variant 5, mRNA.	19	25	38	28	8	15	14	31	21	12	5	25.124	5.88885	21.309	10.7166	12.8334	15.1744	2.95177	20.6475	16.0293	8.95723	12.428	24.8796	12.2028	0.80417	0.540087	0
srna5611314	TGGCTATGATCTGCCTTGTTCAAGCTGAGACCT	33	1	chr2	234197555	234197587	+	EXACT	refGene	NM_017974	ATG16L1	234160216	234204320	+	Homo sapiens ATG16 autophagy related 16-like 1 (S. cerevisiae) (ATG16L1), transcript variant 2, mRNA.	19	25	38	28	8	15	14	31	21	12	5	25.124	5.88885	21.309	10.7166	12.8334	15.1744	2.95177	20.6475	16.0293	8.95723	12.428	24.8796	12.2028	0.80417	0.540087	0
srna5611314	TGGCTATGATCTGCCTTGTTCAAGCTGAGACCT	33	1	chr2	234197555	234197587	+	EXACT	refGene	NM_030803	ATG16L1	234160216	234204320	+	Homo sapiens ATG16 autophagy related 16-like 1 (S. cerevisiae) (ATG16L1), transcript variant 1, mRNA.	19	25	38	28	8	15	14	31	21	12	5	25.124	5.88885	21.309	10.7166	12.8334	15.1744	2.95177	20.6475	16.0293	8.95723	12.428	24.8796	12.2028	0.80417	0.540087	0
srna5611314	TGGCTATGATCTGCCTTGTTCAAGCTGAGACCT	33	1	chr2	234197555	234197587	+	EXACT	refGene	NM_198890	ATG16L1	234160216	234204320	+	Homo sapiens ATG16 autophagy related 16-like 1 (S. cerevisiae) (ATG16L1), transcript variant 3, mRNA.	19	25	38	28	8	15	14	31	21	12	5	25.124	5.88885	21.309	10.7166	12.8334	15.1744	2.95177	20.6475	16.0293	8.95723	12.428	24.8796	12.2028	0.80417	0.540087	0
srna4274855	GGTCGATGATGATTGGTAAAAGGTCTGATTGCACTGAA	38	1	chr2	234184373	234184410	+	EXACT	refGene	NM_001190266	ATG16L1	234160216	234204320	+	Homo sapiens ATG16 autophagy related 16-like 1 (S. cerevisiae) (ATG16L1), transcript variant 4, mRNA.	7	37	11	4	5	14	4	17	16	14	13	7.27273	3.68053	3.04414	10.0021	3.6667	5.53325	7.6746	30.5583	12.2128	10.4501	4.57875	13.6437	13.0949	2.36659	0.175894	0
srna4274855	GGTCGATGATGATTGGTAAAAGGTCTGATTGCACTGAA	38	1	chr2	234184373	234184410	+	EXACT	refGene	NM_001190267	ATG16L1	234160216	234204320	+	Homo sapiens ATG16 autophagy related 16-like 1 (S. cerevisiae) (ATG16L1), transcript variant 5, mRNA.	7	37	11	4	5	14	4	17	16	14	13	7.27273	3.68053	3.04414	10.0021	3.6667	5.53325	7.6746	30.5583	12.2128	10.4501	4.57875	13.6437	13.0949	2.36659	0.175894	0
srna4274855	GGTCGATGATGATTGGTAAAAGGTCTGATTGCACTGAA	38	1	chr2	234184373	234184410	+	EXACT	refGene	NM_017974	ATG16L1	234160216	234204320	+	Homo sapiens ATG16 autophagy related 16-like 1 (S. cerevisiae) (ATG16L1), transcript variant 2, mRNA.	7	37	11	4	5	14	4	17	16	14	13	7.27273	3.68053	3.04414	10.0021	3.6667	5.53325	7.6746	30.5583	12.2128	10.4501	4.57875	13.6437	13.0949	2.36659	0.175894	0
srna4274855	GGTCGATGATGATTGGTAAAAGGTCTGATTGCACTGAA	38	1	chr2	234184373	234184410	+	EXACT	refGene	NM_030803	ATG16L1	234160216	234204320	+	Homo sapiens ATG16 autophagy related 16-like 1 (S. cerevisiae) (ATG16L1), transcript variant 1, mRNA.	7	37	11	4	5	14	4	17	16	14	13	7.27273	3.68053	3.04414	10.0021	3.6667	5.53325	7.6746	30.5583	12.2128	10.4501	4.57875	13.6437	13.0949	2.36659	0.175894	0
srna4274855	GGTCGATGATGATTGGTAAAAGGTCTGATTGCACTGAA	38	1	chr2	234184373	234184410	+	EXACT	refGene	NM_198890	ATG16L1	234160216	234204320	+	Homo sapiens ATG16 autophagy related 16-like 1 (S. cerevisiae) (ATG16L1), transcript variant 3, mRNA.	7	37	11	4	5	14	4	17	16	14	13	7.27273	3.68053	3.04414	10.0021	3.6667	5.53325	7.6746	30.5583	12.2128	10.4501	4.57875	13.6437	13.0949	2.36659	0.175894	0
srna4481446	GTGGCTATGATCTGCCTTGTTCAAGCTGAGACC	33	1	chr2	234197554	234197586	+	EXACT	refGene	NM_001190266	ATG16L1	234160216	234204320	+	Homo sapiens ATG16 autophagy related 16-like 1 (S. cerevisiae) (ATG16L1), transcript variant 4, mRNA.	2	10	11	5	2	4	10	4	2	6		7.27273	1.47221	3.80518	2.85776	9.16674	4.91492	0	8.259	1.5266	4.47861	1.30822	3.21027	3.11449	0.63368	0.407332	0
srna4481446	GTGGCTATGATCTGCCTTGTTCAAGCTGAGACC	33	1	chr2	234197554	234197586	+	EXACT	refGene	NM_001190267	ATG16L1	234160216	234204320	+	Homo sapiens ATG16 autophagy related 16-like 1 (S. cerevisiae) (ATG16L1), transcript variant 5, mRNA.	2	10	11	5	2	4	10	4	2	6		7.27273	1.47221	3.80518	2.85776	9.16674	4.91492	0	8.259	1.5266	4.47861	1.30822	3.21027	3.11449	0.63368	0.407332	0
srna4481446	GTGGCTATGATCTGCCTTGTTCAAGCTGAGACC	33	1	chr2	234197554	234197586	+	EXACT	refGene	NM_017974	ATG16L1	234160216	234204320	+	Homo sapiens ATG16 autophagy related 16-like 1 (S. cerevisiae) (ATG16L1), transcript variant 2, mRNA.	2	10	11	5	2	4	10	4	2	6		7.27273	1.47221	3.80518	2.85776	9.16674	4.91492	0	8.259	1.5266	4.47861	1.30822	3.21027	3.11449	0.63368	0.407332	0
srna4481446	GTGGCTATGATCTGCCTTGTTCAAGCTGAGACC	33	1	chr2	234197554	234197586	+	EXACT	refGene	NM_030803	ATG16L1	234160216	234204320	+	Homo sapiens ATG16 autophagy related 16-like 1 (S. cerevisiae) (ATG16L1), transcript variant 1, mRNA.	2	10	11	5	2	4	10	4	2	6		7.27273	1.47221	3.80518	2.85776	9.16674	4.91492	0	8.259	1.5266	4.47861	1.30822	3.21027	3.11449	0.63368	0.407332	0
srna4481446	GTGGCTATGATCTGCCTTGTTCAAGCTGAGACC	33	1	chr2	234197554	234197586	+	EXACT	refGene	NM_198890	ATG16L1	234160216	234204320	+	Homo sapiens ATG16 autophagy related 16-like 1 (S. cerevisiae) (ATG16L1), transcript variant 3, mRNA.	2	10	11	5	2	4	10	4	2	6		7.27273	1.47221	3.80518	2.85776	9.16674	4.91492	0	8.259	1.5266	4.47861	1.30822	3.21027	3.11449	0.63368	0.407332	0
srna4285170	GGTGCATGATCTCAAGTTTTCAATCTGAGACCT	33	1	chr2	234184617	234184649	+	EXACT	refGene	NM_001190266	ATG16L1	234160216	234204320	+	Homo sapiens ATG16 autophagy related 16-like 1 (S. cerevisiae) (ATG16L1), transcript variant 4, mRNA.	8	12	6	5	9	9	4	6	5	3	4	3.96694	6.62495	3.80518	6.42995	3.6667	4.89874	2.36141	9.9108	3.8165	2.23931	5.23286	4.81541	4.71218	0.961916	0.90888	0
srna4285170	GGTGCATGATCTCAAGTTTTCAATCTGAGACCT	33	1	chr2	234184617	234184649	+	EXACT	refGene	NM_001190267	ATG16L1	234160216	234204320	+	Homo sapiens ATG16 autophagy related 16-like 1 (S. cerevisiae) (ATG16L1), transcript variant 5, mRNA.	8	12	6	5	9	9	4	6	5	3	4	3.96694	6.62495	3.80518	6.42995	3.6667	4.89874	2.36141	9.9108	3.8165	2.23931	5.23286	4.81541	4.71218	0.961916	0.90888	0
srna4285170	GGTGCATGATCTCAAGTTTTCAATCTGAGACCT	33	1	chr2	234184617	234184649	+	EXACT	refGene	NM_017974	ATG16L1	234160216	234204320	+	Homo sapiens ATG16 autophagy related 16-like 1 (S. cerevisiae) (ATG16L1), transcript variant 2, mRNA.	8	12	6	5	9	9	4	6	5	3	4	3.96694	6.62495	3.80518	6.42995	3.6667	4.89874	2.36141	9.9108	3.8165	2.23931	5.23286	4.81541	4.71218	0.961916	0.90888	0
srna4285170	GGTGCATGATCTCAAGTTTTCAATCTGAGACCT	33	1	chr2	234184617	234184649	+	EXACT	refGene	NM_030803	ATG16L1	234160216	234204320	+	Homo sapiens ATG16 autophagy related 16-like 1 (S. cerevisiae) (ATG16L1), transcript variant 1, mRNA.	8	12	6	5	9	9	4	6	5	3	4	3.96694	6.62495	3.80518	6.42995	3.6667	4.89874	2.36141	9.9108	3.8165	2.23931	5.23286	4.81541	4.71218	0.961916	0.90888	0
srna4285170	GGTGCATGATCTCAAGTTTTCAATCTGAGACCT	33	1	chr2	234184617	234184649	+	EXACT	refGene	NM_198890	ATG16L1	234160216	234204320	+	Homo sapiens ATG16 autophagy related 16-like 1 (S. cerevisiae) (ATG16L1), transcript variant 3, mRNA.	8	12	6	5	9	9	4	6	5	3	4	3.96694	6.62495	3.80518	6.42995	3.6667	4.89874	2.36141	9.9108	3.8165	2.23931	5.23286	4.81541	4.71218	0.961916	0.90888	0
srna5671688	TGGTGCATGATCTCAAGTTTTCAATCTGAGACCT	34	1	chr2	234184616	234184649	+	EXACT	refGene	NM_001190266	ATG16L1	234160216	234204320	+	Homo sapiens ATG16 autophagy related 16-like 1 (S. cerevisiae) (ATG16L1), transcript variant 4, mRNA.	7	13	8	1	2	7	5	10	12	3	2	5.28926	1.47221	0.761035	5.00107	4.58337	3.42139	1.18071	10.7367	9.15961	2.23931	4.57875	8.02568	5.57902	1.63063	0.346647	0
srna5671688	TGGTGCATGATCTCAAGTTTTCAATCTGAGACCT	34	1	chr2	234184616	234184649	+	EXACT	refGene	NM_001190267	ATG16L1	234160216	234204320	+	Homo sapiens ATG16 autophagy related 16-like 1 (S. cerevisiae) (ATG16L1), transcript variant 5, mRNA.	7	13	8	1	2	7	5	10	12	3	2	5.28926	1.47221	0.761035	5.00107	4.58337	3.42139	1.18071	10.7367	9.15961	2.23931	4.57875	8.02568	5.57902	1.63063	0.346647	0
srna5671688	TGGTGCATGATCTCAAGTTTTCAATCTGAGACCT	34	1	chr2	234184616	234184649	+	EXACT	refGene	NM_017974	ATG16L1	234160216	234204320	+	Homo sapiens ATG16 autophagy related 16-like 1 (S. cerevisiae) (ATG16L1), transcript variant 2, mRNA.	7	13	8	1	2	7	5	10	12	3	2	5.28926	1.47221	0.761035	5.00107	4.58337	3.42139	1.18071	10.7367	9.15961	2.23931	4.57875	8.02568	5.57902	1.63063	0.346647	0
srna5671688	TGGTGCATGATCTCAAGTTTTCAATCTGAGACCT	34	1	chr2	234184616	234184649	+	EXACT	refGene	NM_030803	ATG16L1	234160216	234204320	+	Homo sapiens ATG16 autophagy related 16-like 1 (S. cerevisiae) (ATG16L1), transcript variant 1, mRNA.	7	13	8	1	2	7	5	10	12	3	2	5.28926	1.47221	0.761035	5.00107	4.58337	3.42139	1.18071	10.7367	9.15961	2.23931	4.57875	8.02568	5.57902	1.63063	0.346647	0
srna5671688	TGGTGCATGATCTCAAGTTTTCAATCTGAGACCT	34	1	chr2	234184616	234184649	+	EXACT	refGene	NM_198890	ATG16L1	234160216	234204320	+	Homo sapiens ATG16 autophagy related 16-like 1 (S. cerevisiae) (ATG16L1), transcript variant 3, mRNA.	7	13	8	1	2	7	5	10	12	3	2	5.28926	1.47221	0.761035	5.00107	4.58337	3.42139	1.18071	10.7367	9.15961	2.23931	4.57875	8.02568	5.57902	1.63063	0.346647	0
srna4140806	GGCTGGTCAGATGGTAGTGGGTTATCAGAACT	32	1	chr15	26063130	26063161	+	EXACT	refGene	NM_024490	ATP10A	25923859	26108349	-	Homo sapiens ATPase, class V, type 10A (ATP10A), mRNA.	16	30	15	9	17	17	14	11	8	11	135	9.91736	12.5138	6.84932	12.1455	12.8334	10.8519	79.6977	24.777	6.1064	8.21079	10.4657	8.82825	25.8515	2.38222	0.340499	0
srna4140808	GGCTGGTCAGATGGTAGTGGGTTATCAGAACTT	33	1	chr15	26063130	26063162	+	EXACT	refGene	NM_024490	ATP10A	25923859	26108349	-	Homo sapiens ATPase, class V, type 10A (ATP10A), mRNA.	5	11	2	1	4	6	1	6	6	2	9	1.32231	2.94442	0.761035	4.28663	0.916674	2.04622	5.31318	9.0849	4.5798	1.49287	3.27054	4.81541	4.74826	2.32051	0.107668	0
srna1607217	ATGGGGGCATGACCA	15	1	chr3	193171543	193171557	+	EXACT	refGene	NM_032279	ATP13A4	193119865	193272696	-	Homo sapiens ATPase type 13A4 (ATP13A4), mRNA.	5	2		1		1		2	2	4	11	0	0	0.761035	0.714439	0	0.295095	6.49389	1.6518	1.5266	2.98574	3.27054	1.60514	3.18571	10.7956	0.03072	0
srna2889817	CTAAGCCTGGCTTAGAAGGCACTGGGAATGTCCTG	35	1	chr1	160112793	160112827	+	EXACT	refGene	NM_000702	ATP1A2	160085519	160113374	+	Homo sapiens ATPase, Na+/K+ transporting, alpha 2 polypeptide (ATP1A2), mRNA.	4	19	12	3	3	23	11	13	6	4	2	7.93388	2.20832	2.28311	16.4321	10.0834	7.78816	1.18071	15.6921	4.5798	2.98574	2.61643	10.4334	5.41096	0.694767	0.54255	0
srna365949	AAGCCTGGCTTAGAAGGCAC	20	1	chr1	160112795	160112814	+	EXACT	refGene	NM_000702	ATP1A2	160085519	160113374	+	Homo sapiens ATPase, Na+/K+ transporting, alpha 2 polypeptide (ATP1A2), mRNA.		15	17	2	2	8	4		5	3	1	11.2397	1.47221	1.52207	5.71551	3.6667	4.72323	0.590354	12.3885	3.8165	2.23931	0	0	3.80693	0.806002	0.759178	0
srna5966102	TTCTCTAAGCCTGGCTTAGAAGGCAC	26	1	chr1	160112789	160112814	+	EXACT	refGene	NM_000702	ATP1A2	160085519	160113374	+	Homo sapiens ATPase, Na+/K+ transporting, alpha 2 polypeptide (ATP1A2), mRNA.		11	12		2	5	6	8	4	2		7.93388	1.47221	0	3.57219	5.50005	3.69567	0	9.0849	3.0532	1.49287	0	6.42055	2.7262	0.737673	0.671411	0
srna3017880	CTCTAAGCCTGGCTTAGAAGGCAC	24	1	chr1	160112791	160112814	+	EXACT	refGene	NM_000702	ATP1A2	160085519	160113374	+	Homo sapiens ATPase, Na+/K+ transporting, alpha 2 polypeptide (ATP1A2), mRNA.	1	15	3	2		8	3	2	1	2		1.98347	0	1.52207	5.71551	2.75002	2.39421	0	12.3885	0.763301	1.49287	0.654108	1.60514	3.05976	1.27798	0.802271	0
srna5252028	TCTCTAAGCCTGGCTTAGAAGGCAC	25	1	chr1	160112790	160112814	+	EXACT	refGene	NM_000702	ATP1A2	160085519	160113374	+	Homo sapiens ATPase, Na+/K+ transporting, alpha 2 polypeptide (ATP1A2), mRNA.		10	6	1		3	2	1	6	1		3.96694	0	0.761035	2.14332	1.83335	1.74093	0	8.259	4.5798	0.746436	0	0.802568	2.71705	1.56069	0.601576	0
srna5617055	TGGCTGGGAGACCGCC	16	1	chr17	3854827	3854842	+	EXACT	refGene	NM_005173	ATP2A3	3827162	3867758	-	Homo sapiens ATPase, Ca++ transporting, ubiquitous (ATP2A3), transcript variant 1, mRNA.	8	11	5	3	15	34	9	10	13	10	4	3.30579	11.0416	2.28311	24.2909	8.25007	9.83429	2.36141	9.0849	9.92291	7.46436	5.23286	8.02568	6.81329	0.692809	0.502975	0
srna5617055	TGGCTGGGAGACCGCC	16	1	chr17	3854827	3854842	+	EXACT	refGene	NM_174953	ATP2A3	3827162	3867758	-	Homo sapiens ATPase, Ca++ transporting, ubiquitous (ATP2A3), transcript variant 5, mRNA.	8	11	5	3	15	34	9	10	13	10	4	3.30579	11.0416	2.28311	24.2909	8.25007	9.83429	2.36141	9.0849	9.92291	7.46436	5.23286	8.02568	6.81329	0.692809	0.502975	0
srna5617055	TGGCTGGGAGACCGCC	16	1	chr17	3854827	3854842	+	EXACT	refGene	NM_174954	ATP2A3	3827162	3867758	-	Homo sapiens ATPase, Ca++ transporting, ubiquitous (ATP2A3), transcript variant 4, mRNA.	8	11	5	3	15	34	9	10	13	10	4	3.30579	11.0416	2.28311	24.2909	8.25007	9.83429	2.36141	9.0849	9.92291	7.46436	5.23286	8.02568	6.81329	0.692809	0.502975	0
srna5617055	TGGCTGGGAGACCGCC	16	1	chr17	3854827	3854842	+	EXACT	refGene	NM_174955	ATP2A3	3827162	3867758	-	Homo sapiens ATPase, Ca++ transporting, ubiquitous (ATP2A3), transcript variant 2, mRNA.	8	11	5	3	15	34	9	10	13	10	4	3.30579	11.0416	2.28311	24.2909	8.25007	9.83429	2.36141	9.0849	9.92291	7.46436	5.23286	8.02568	6.81329	0.692809	0.502975	0
srna5617055	TGGCTGGGAGACCGCC	16	1	chr17	3854827	3854842	+	EXACT	refGene	NM_174956	ATP2A3	3827162	3867758	-	Homo sapiens ATPase, Ca++ transporting, ubiquitous (ATP2A3), transcript variant 3, mRNA.	8	11	5	3	15	34	9	10	13	10	4	3.30579	11.0416	2.28311	24.2909	8.25007	9.83429	2.36141	9.0849	9.92291	7.46436	5.23286	8.02568	6.81329	0.692809	0.502975	0
srna5617055	TGGCTGGGAGACCGCC	16	1	chr17	3854827	3854842	+	EXACT	refGene	NM_174957	ATP2A3	3827162	3867758	-	Homo sapiens ATPase, Ca++ transporting, ubiquitous (ATP2A3), transcript variant 6, mRNA.	8	11	5	3	15	34	9	10	13	10	4	3.30579	11.0416	2.28311	24.2909	8.25007	9.83429	2.36141	9.0849	9.92291	7.46436	5.23286	8.02568	6.81329	0.692809	0.502975	0
srna5617055	TGGCTGGGAGACCGCC	16	1	chr17	3854827	3854842	+	EXACT	refGene	NM_174958	ATP2A3	3827162	3867758	-	Homo sapiens ATPase, Ca++ transporting, ubiquitous (ATP2A3), transcript variant 7, mRNA.	8	11	5	3	15	34	9	10	13	10	4	3.30579	11.0416	2.28311	24.2909	8.25007	9.83429	2.36141	9.0849	9.92291	7.46436	5.23286	8.02568	6.81329	0.692809	0.502975	0
srna1209827	AGGCAGCGGGGTGTAGTGGAT	21	1	chr3	10436184	10436204	-	EXACT	refGene	NM_001001331	ATP2B2	10365706	10547268	-	Homo sapiens ATPase, Ca++ transporting, plasma membrane 2 (ATP2B2), transcript variant 1, mRNA.	12	9	27	15	40	25	21	15	16	14	18	17.8512	29.4442	11.4155	17.861	19.2502	19.1644	10.6264	7.4331	12.2128	10.4501	7.84929	12.0385	9.71433	0.506894	0.0285381	0
srna1209827	AGGCAGCGGGGTGTAGTGGAT	21	1	chr3	10436184	10436204	-	EXACT	refGene	NM_001683	ATP2B2	10365706	10547268	-	Homo sapiens ATPase, Ca++ transporting, plasma membrane 2 (ATP2B2), transcript variant 2, mRNA.	12	9	27	15	40	25	21	15	16	14	18	17.8512	29.4442	11.4155	17.861	19.2502	19.1644	10.6264	7.4331	12.2128	10.4501	7.84929	12.0385	9.71433	0.506894	0.0285381	0
srna5283461	TCTGCCAGAGAAACATTCCAGGGTGCTG	28	1	chr1	203698758	203698785	+	EXACT	refGene	NM_001001396	ATP2B4	203595914	203713209	+	Homo sapiens ATPase, Ca++ transporting, plasma membrane 4 (ATP2B4), transcript variant 1, mRNA.	1	30	17	4		7	12	12	11	3		11.2397	0	3.04414	5.00107	11.0001	6.05699	0	24.777	8.39631	2.23931	0.654108	9.63082	7.21335	1.19091	0.829714	0
srna5283461	TCTGCCAGAGAAACATTCCAGGGTGCTG	28	1	chr1	203698758	203698785	+	EXACT	refGene	NM_001684	ATP2B4	203595914	203713209	+	Homo sapiens ATPase, Ca++ transporting, plasma membrane 4 (ATP2B4), transcript variant 2, mRNA.	1	30	17	4		7	12	12	11	3		11.2397	0	3.04414	5.00107	11.0001	6.05699	0	24.777	8.39631	2.23931	0.654108	9.63082	7.21335	1.19091	0.829714	0
srna6018867	TTGCAGACTCACTATGCACCTGACTGT	27	1	chr1	203698707	203698733	+	EXACT	refGene	NM_001001396	ATP2B4	203595914	203713209	+	Homo sapiens ATPase, Ca++ transporting, plasma membrane 4 (ATP2B4), transcript variant 1, mRNA.	4	4	13	9	5	3	4		6	5	1	8.59504	3.68053	6.84932	2.14332	3.6667	4.98698	0.590354	3.3036	4.5798	3.73218	2.61643	0	2.96447	0.594443	0.185429	0
srna6018867	TTGCAGACTCACTATGCACCTGACTGT	27	1	chr1	203698707	203698733	+	EXACT	refGene	NM_001684	ATP2B4	203595914	203713209	+	Homo sapiens ATPase, Ca++ transporting, plasma membrane 4 (ATP2B4), transcript variant 2, mRNA.	4	4	13	9	5	3	4		6	5	1	8.59504	3.68053	6.84932	2.14332	3.6667	4.98698	0.590354	3.3036	4.5798	3.73218	2.61643	0	2.96447	0.594443	0.185429	0
srna6018857	TTGCAGACTCACTATGCACCT	21	1	chr1	203698707	203698727	+	EXACT	refGene	NM_001001396	ATP2B4	203595914	203713209	+	Homo sapiens ATPase, Ca++ transporting, plasma membrane 4 (ATP2B4), transcript variant 1, mRNA.	4	4	6	8	5	4	4	1	10	6	2	3.96694	3.68053	6.08828	2.85776	3.6667	4.05204	1.18071	3.3036	7.63301	4.47861	2.61643	0.802568	3.84247	0.948281	0.868835	0
srna6018857	TTGCAGACTCACTATGCACCT	21	1	chr1	203698707	203698727	+	EXACT	refGene	NM_001684	ATP2B4	203595914	203713209	+	Homo sapiens ATPase, Ca++ transporting, plasma membrane 4 (ATP2B4), transcript variant 2, mRNA.	4	4	6	8	5	4	4	1	10	6	2	3.96694	3.68053	6.08828	2.85776	3.6667	4.05204	1.18071	3.3036	7.63301	4.47861	2.61643	0.802568	3.84247	0.948281	0.868835	0
srna5283475	TCTGCCAGAGAAACATTCCAGGGTGCTGTGGCTGCCT	37	1	chr1	203698758	203698794	+	EXACT	refGene	NM_001001396	ATP2B4	203595914	203713209	+	Homo sapiens ATPase, Ca++ transporting, plasma membrane 4 (ATP2B4), transcript variant 1, mRNA.		11	4	2	4	1	6	10	5	1		2.64463	2.94442	1.52207	0.714439	5.50005	2.66512	0	9.0849	3.8165	0.746436	0	8.02568	2.72957	1.02418	0.974356	0
srna5283475	TCTGCCAGAGAAACATTCCAGGGTGCTGTGGCTGCCT	37	1	chr1	203698758	203698794	+	EXACT	refGene	NM_001684	ATP2B4	203595914	203713209	+	Homo sapiens ATPase, Ca++ transporting, plasma membrane 4 (ATP2B4), transcript variant 2, mRNA.		11	4	2	4	1	6	10	5	1		2.64463	2.94442	1.52207	0.714439	5.50005	2.66512	0	9.0849	3.8165	0.746436	0	8.02568	2.72957	1.02418	0.974356	0
srna6018862	TTGCAGACTCACTATGCACCTGA	23	1	chr1	203698707	203698729	+	EXACT	refGene	NM_001001396	ATP2B4	203595914	203713209	+	Homo sapiens ATPase, Ca++ transporting, plasma membrane 4 (ATP2B4), transcript variant 1, mRNA.	1	5	9	4	5			10	4	4	3	5.95041	3.68053	3.04414	0	0	2.53502	1.77106	4.1295	3.0532	2.98574	0.654108	8.02568	2.51872	0.993573	0.990321	0
srna6018862	TTGCAGACTCACTATGCACCTGA	23	1	chr1	203698707	203698729	+	EXACT	refGene	NM_001684	ATP2B4	203595914	203713209	+	Homo sapiens ATPase, Ca++ transporting, plasma membrane 4 (ATP2B4), transcript variant 2, mRNA.	1	5	9	4	5			10	4	4	3	5.95041	3.68053	3.04414	0	0	2.53502	1.77106	4.1295	3.0532	2.98574	0.654108	8.02568	2.51872	0.993573	0.990321	0
srna4427233	GTCTGCCAGAGAAACATTCCAGGGTGCTG	29	1	chr1	203698757	203698785	+	EXACT	refGene	NM_001001396	ATP2B4	203595914	203713209	+	Homo sapiens ATPase, Ca++ transporting, plasma membrane 4 (ATP2B4), transcript variant 1, mRNA.		10	8				8	9	9			5.28926	0	0	0	7.33339	2.52453	0	8.259	6.8697	0	0	7.22311	3.02574	1.19854	0.842805	0
srna4427233	GTCTGCCAGAGAAACATTCCAGGGTGCTG	29	1	chr1	203698757	203698785	+	EXACT	refGene	NM_001684	ATP2B4	203595914	203713209	+	Homo sapiens ATPase, Ca++ transporting, plasma membrane 4 (ATP2B4), transcript variant 2, mRNA.		10	8				8	9	9			5.28926	0	0	0	7.33339	2.52453	0	8.259	6.8697	0	0	7.22311	3.02574	1.19854	0.842805	0
srna6018868	TTGCAGACTCACTATGCACCTGACTGTA	28	1	chr1	203698707	203698734	+	EXACT	refGene	NM_001001396	ATP2B4	203595914	203713209	+	Homo sapiens ATPase, Ca++ transporting, plasma membrane 4 (ATP2B4), transcript variant 1, mRNA.	5	5	6	4	5	1		5	11	7	9	3.96694	3.68053	3.04414	0.714439	0	2.28121	5.31318	4.1295	8.39631	5.22505	3.27054	4.01284	5.26692	2.30883	0.036058	0
srna6018868	TTGCAGACTCACTATGCACCTGACTGTA	28	1	chr1	203698707	203698734	+	EXACT	refGene	NM_001684	ATP2B4	203595914	203713209	+	Homo sapiens ATPase, Ca++ transporting, plasma membrane 4 (ATP2B4), transcript variant 2, mRNA.	5	5	6	4	5	1		5	11	7	9	3.96694	3.68053	3.04414	0.714439	0	2.28121	5.31318	4.1295	8.39631	5.22505	3.27054	4.01284	5.26692	2.30883	0.036058	0
srna1808058	CAAGCTAGCTCAGTCGGTAGAGCATGGGACT	31	1	chr18	43669311	43669339	-	CLIPPED	refGene	NM_001001937	ATP5A1	43664109	43684199	-	Homo sapiens ATP synthase, H+ transporting, mitochondrial F1 complex, alpha subunit 1, cardiac muscle (ATP5A1), nuclear gene encoding mitochondrial protein, transcript variant 1, mRNA.	99	29	62	70	116	102	71	54	45	46	81	40.9917	85.3883	53.2725	72.8728	65.0839	63.5218	47.8186	23.9511	34.3485	34.336	64.7567	43.3387	41.0422	0.646112	0.0632752	0
srna1808058	CAAGCTAGCTCAGTCGGTAGAGCATGGGACT	31	1	chr18	43669311	43669339	-	CLIPPED	refGene	NM_004046	ATP5A1	43664109	43678319	-	Homo sapiens ATP synthase, H+ transporting, mitochondrial F1 complex, alpha subunit 1, cardiac muscle (ATP5A1), nuclear gene encoding mitochondrial protein, transcript variant 2, mRNA.	99	29	62	70	116	102	71	54	45	46	81	40.9917	85.3883	53.2725	72.8728	65.0839	63.5218	47.8186	23.9511	34.3485	34.336	64.7567	43.3387	41.0422	0.646112	0.0632752	0
srna371897	AAGCTAGCTCAGTCGGTAGAGCATGGGACT	30	1	chr18	43669311	43669339	-	CLIPPED	refGene	NM_001001937	ATP5A1	43664109	43684199	-	Homo sapiens ATP synthase, H+ transporting, mitochondrial F1 complex, alpha subunit 1, cardiac muscle (ATP5A1), nuclear gene encoding mitochondrial protein, transcript variant 1, mRNA.	104	22	40	64	87	81	65	31	39	38	67	26.4463	64.0412	48.7062	57.8695	59.5838	51.3294	39.5537	18.1698	29.7687	28.3646	68.0272	24.8796	36.7768	0.716486	0.21814	0
srna371897	AAGCTAGCTCAGTCGGTAGAGCATGGGACT	30	1	chr18	43669311	43669339	-	CLIPPED	refGene	NM_004046	ATP5A1	43664109	43678319	-	Homo sapiens ATP synthase, H+ transporting, mitochondrial F1 complex, alpha subunit 1, cardiac muscle (ATP5A1), nuclear gene encoding mitochondrial protein, transcript variant 2, mRNA.	104	22	40	64	87	81	65	31	39	38	67	26.4463	64.0412	48.7062	57.8695	59.5838	51.3294	39.5537	18.1698	29.7687	28.3646	68.0272	24.8796	36.7768	0.716486	0.21814	0
srna792224	ACGCTAGCTCAGTCGGTAGAGCATGGGACT	30	1	chr18	43669311	43669338	-	CLIPPED	refGene	NM_001001937	ATP5A1	43664109	43684199	-	Homo sapiens ATP synthase, H+ transporting, mitochondrial F1 complex, alpha subunit 1, cardiac muscle (ATP5A1), nuclear gene encoding mitochondrial protein, transcript variant 1, mRNA.	30	8	14	13	27	17	12	6	9	6	25	9.2562	19.8749	9.89346	12.1455	11.0001	12.434	14.7588	6.6072	6.8697	4.47861	19.6232	4.81541	10.4675	0.841846	0.588057	0
srna792224	ACGCTAGCTCAGTCGGTAGAGCATGGGACT	30	1	chr18	43669311	43669338	-	CLIPPED	refGene	NM_004046	ATP5A1	43664109	43678319	-	Homo sapiens ATP synthase, H+ transporting, mitochondrial F1 complex, alpha subunit 1, cardiac muscle (ATP5A1), nuclear gene encoding mitochondrial protein, transcript variant 2, mRNA.	30	8	14	13	27	17	12	6	9	6	25	9.2562	19.8749	9.89346	12.1455	11.0001	12.434	14.7588	6.6072	6.8697	4.47861	19.6232	4.81541	10.4675	0.841846	0.588057	0
srna1808060	CAAGCTAGCTCAGTCGGTAGAGCATGGGACTC	32	1	chr18	43669310	43669339	-	CLIPPED	refGene	NM_001001937	ATP5A1	43664109	43684199	-	Homo sapiens ATP synthase, H+ transporting, mitochondrial F1 complex, alpha subunit 1, cardiac muscle (ATP5A1), nuclear gene encoding mitochondrial protein, transcript variant 1, mRNA.	9	16	7	5	14	6	8	8	16	17	28	4.6281	10.3055	3.80518	4.28663	7.33339	6.07176	16.5299	13.2144	12.2128	12.6894	5.88697	6.42055	12.1067	1.99394	0.0240012	0
srna1808060	CAAGCTAGCTCAGTCGGTAGAGCATGGGACTC	32	1	chr18	43669310	43669339	-	CLIPPED	refGene	NM_004046	ATP5A1	43664109	43678319	-	Homo sapiens ATP synthase, H+ transporting, mitochondrial F1 complex, alpha subunit 1, cardiac muscle (ATP5A1), nuclear gene encoding mitochondrial protein, transcript variant 2, mRNA.	9	16	7	5	14	6	8	8	16	17	28	4.6281	10.3055	3.80518	4.28663	7.33339	6.07176	16.5299	13.2144	12.2128	12.6894	5.88697	6.42055	12.1067	1.99394	0.0240012	0
srna2613690	CGAGGCTAGCTCAGTCGGTAGAGCATGGGACT	32	1	chr18	43669311	43669341	-	MISMATCH/INDEL	refGene	NM_001001937	ATP5A1	43664109	43684199	-	Homo sapiens ATP synthase, H+ transporting, mitochondrial F1 complex, alpha subunit 1, cardiac muscle (ATP5A1), nuclear gene encoding mitochondrial protein, transcript variant 1, mRNA.	7	4	4	11	13	8	4	6	2	3	5	2.64463	9.56938	8.37139	5.71551	3.6667	5.99352	2.95177	3.3036	1.5266	2.23931	4.57875	4.81541	2.92001	0.487194	0.0811616	0
srna2613690	CGAGGCTAGCTCAGTCGGTAGAGCATGGGACT	32	1	chr18	43669311	43669341	-	MISMATCH/INDEL	refGene	NM_004046	ATP5A1	43664109	43678319	-	Homo sapiens ATP synthase, H+ transporting, mitochondrial F1 complex, alpha subunit 1, cardiac muscle (ATP5A1), nuclear gene encoding mitochondrial protein, transcript variant 2, mRNA.	7	4	4	11	13	8	4	6	2	3	5	2.64463	9.56938	8.37139	5.71551	3.6667	5.99352	2.95177	3.3036	1.5266	2.23931	4.57875	4.81541	2.92001	0.487194	0.0811616	0
srna1808055	CAAGCTAGCTCAGTCGGTAGAGCATGGGAC	30	1	chr18	43669312	43669339	-	CLIPPED	refGene	NM_001001937	ATP5A1	43664109	43684199	-	Homo sapiens ATP synthase, H+ transporting, mitochondrial F1 complex, alpha subunit 1, cardiac muscle (ATP5A1), nuclear gene encoding mitochondrial protein, transcript variant 1, mRNA.	11	5	3	5	10	8	5	6	8	4	4	1.98347	7.36106	3.80518	5.71551	4.58337	4.68972	2.36141	4.1295	6.1064	2.98574	7.19519	4.81541	4.55565	0.971412	0.919612	0
srna1808055	CAAGCTAGCTCAGTCGGTAGAGCATGGGAC	30	1	chr18	43669312	43669339	-	CLIPPED	refGene	NM_004046	ATP5A1	43664109	43678319	-	Homo sapiens ATP synthase, H+ transporting, mitochondrial F1 complex, alpha subunit 1, cardiac muscle (ATP5A1), nuclear gene encoding mitochondrial protein, transcript variant 2, mRNA.	11	5	3	5	10	8	5	6	8	4	4	1.98347	7.36106	3.80518	5.71551	4.58337	4.68972	2.36141	4.1295	6.1064	2.98574	7.19519	4.81541	4.55565	0.971412	0.919612	0
srna2919634	CTAGCTAGCTCAGTCGGTAGAGCATGGGACT	31	1	chr18	43669311	43669339	-	CLIPPED	refGene	NM_001001937	ATP5A1	43664109	43684199	-	Homo sapiens ATP synthase, H+ transporting, mitochondrial F1 complex, alpha subunit 1, cardiac muscle (ATP5A1), nuclear gene encoding mitochondrial protein, transcript variant 1, mRNA.	8	3	3	5	3	6	9	4	15		3	1.98347	2.20832	3.80518	4.28663	8.25007	4.10673	1.77106	2.4777	11.4495	0	5.23286	3.21027	4.18623	1.01936	0.973463	0
srna2919634	CTAGCTAGCTCAGTCGGTAGAGCATGGGACT	31	1	chr18	43669311	43669339	-	CLIPPED	refGene	NM_004046	ATP5A1	43664109	43678319	-	Homo sapiens ATP synthase, H+ transporting, mitochondrial F1 complex, alpha subunit 1, cardiac muscle (ATP5A1), nuclear gene encoding mitochondrial protein, transcript variant 2, mRNA.	8	3	3	5	3	6	9	4	15		3	1.98347	2.20832	3.80518	4.28663	8.25007	4.10673	1.77106	2.4777	11.4495	0	5.23286	3.21027	4.18623	1.01936	0.973463	0
srna1808064	CAAGCTAGCTCAGTCGGTAGAGCATGGGACTCTT	34	1	chr18	43669308	43669339	-	CLIPPED	refGene	NM_001001937	ATP5A1	43664109	43684199	-	Homo sapiens ATP synthase, H+ transporting, mitochondrial F1 complex, alpha subunit 1, cardiac muscle (ATP5A1), nuclear gene encoding mitochondrial protein, transcript variant 1, mRNA.	9	12	6	3	6	6	6	16	11	9	9	3.96694	4.41664	2.28311	4.28663	5.50005	4.09067	5.31318	9.9108	8.39631	6.71792	5.88697	12.8411	7.24504	1.77111	0.0166264	0
srna1808064	CAAGCTAGCTCAGTCGGTAGAGCATGGGACTCTT	34	1	chr18	43669308	43669339	-	CLIPPED	refGene	NM_004046	ATP5A1	43664109	43678319	-	Homo sapiens ATP synthase, H+ transporting, mitochondrial F1 complex, alpha subunit 1, cardiac muscle (ATP5A1), nuclear gene encoding mitochondrial protein, transcript variant 2, mRNA.	9	12	6	3	6	6	6	16	11	9	9	3.96694	4.41664	2.28311	4.28663	5.50005	4.09067	5.31318	9.9108	8.39631	6.71792	5.88697	12.8411	7.24504	1.77111	0.0166264	0
srna371894	AAGCTAGCTCAGTCGGTAGAGCATGGGAC	29	1	chr18	43669312	43669339	-	CLIPPED	refGene	NM_001001937	ATP5A1	43664109	43684199	-	Homo sapiens ATP synthase, H+ transporting, mitochondrial F1 complex, alpha subunit 1, cardiac muscle (ATP5A1), nuclear gene encoding mitochondrial protein, transcript variant 1, mRNA.	11	4	3	7	6	6	4	3	7	6	5	1.98347	4.41664	5.32725	4.28663	3.6667	3.93614	2.95177	3.3036	5.3431	4.47861	7.19519	2.4077	4.65445	1.18249	0.470978	0
srna371894	AAGCTAGCTCAGTCGGTAGAGCATGGGAC	29	1	chr18	43669312	43669339	-	CLIPPED	refGene	NM_004046	ATP5A1	43664109	43678319	-	Homo sapiens ATP synthase, H+ transporting, mitochondrial F1 complex, alpha subunit 1, cardiac muscle (ATP5A1), nuclear gene encoding mitochondrial protein, transcript variant 2, mRNA.	11	4	3	7	6	6	4	3	7	6	5	1.98347	4.41664	5.32725	4.28663	3.6667	3.93614	2.95177	3.3036	5.3431	4.47861	7.19519	2.4077	4.65445	1.18249	0.470978	0
srna371901	AAGCTAGCTCAGTCGGTAGAGCATGGGACTCTT	33	1	chr18	43669308	43669339	-	CLIPPED	refGene	NM_001001937	ATP5A1	43664109	43684199	-	Homo sapiens ATP synthase, H+ transporting, mitochondrial F1 complex, alpha subunit 1, cardiac muscle (ATP5A1), nuclear gene encoding mitochondrial protein, transcript variant 1, mRNA.	8	5	6	6	3	6	5	8	12	8	3	3.96694	2.20832	4.56621	4.28663	4.58337	3.92229	1.77106	4.1295	9.15961	5.97149	5.23286	6.42055	5.2529	1.33924	0.347816	0
srna371901	AAGCTAGCTCAGTCGGTAGAGCATGGGACTCTT	33	1	chr18	43669308	43669339	-	CLIPPED	refGene	NM_004046	ATP5A1	43664109	43678319	-	Homo sapiens ATP synthase, H+ transporting, mitochondrial F1 complex, alpha subunit 1, cardiac muscle (ATP5A1), nuclear gene encoding mitochondrial protein, transcript variant 2, mRNA.	8	5	6	6	3	6	5	8	12	8	3	3.96694	2.20832	4.56621	4.28663	4.58337	3.92229	1.77106	4.1295	9.15961	5.97149	5.23286	6.42055	5.2529	1.33924	0.347816	0
srna2610028	CGAGCTAGCTCAGTCGGTAGAGCATGGGACT	31	1	chr18	43669311	43669341	-	EXACT	refGene	NM_001001937	ATP5A1	43664109	43684199	-	Homo sapiens ATP synthase, H+ transporting, mitochondrial F1 complex, alpha subunit 1, cardiac muscle (ATP5A1), nuclear gene encoding mitochondrial protein, transcript variant 1, mRNA.	10	1	5	4	6	7	4	5	2	3	8	3.30579	4.41664	3.04414	5.00107	3.6667	3.88687	4.72283	0.8259	1.5266	2.23931	6.54108	4.01284	3.17114	0.815861	0.554217	0
srna2610028	CGAGCTAGCTCAGTCGGTAGAGCATGGGACT	31	1	chr18	43669311	43669341	-	EXACT	refGene	NM_004046	ATP5A1	43664109	43678319	-	Homo sapiens ATP synthase, H+ transporting, mitochondrial F1 complex, alpha subunit 1, cardiac muscle (ATP5A1), nuclear gene encoding mitochondrial protein, transcript variant 2, mRNA.	10	1	5	4	6	7	4	5	2	3	8	3.30579	4.41664	3.04414	5.00107	3.6667	3.88687	4.72283	0.8259	1.5266	2.23931	6.54108	4.01284	3.17114	0.815861	0.554217	0
srna1808063	CAAGCTAGCTCAGTCGGTAGAGCATGGGACTCT	33	1	chr18	43669309	43669339	-	CLIPPED	refGene	NM_001001937	ATP5A1	43664109	43684199	-	Homo sapiens ATP synthase, H+ transporting, mitochondrial F1 complex, alpha subunit 1, cardiac muscle (ATP5A1), nuclear gene encoding mitochondrial protein, transcript variant 1, mRNA.	10	11	5	2	9	6	2	3	18	6	6	3.30579	6.62495	1.52207	4.28663	1.83335	3.51456	3.54212	9.0849	13.7394	4.47861	6.54108	2.4077	7.47723	2.1275	0.102467	0
srna1808063	CAAGCTAGCTCAGTCGGTAGAGCATGGGACTCT	33	1	chr18	43669309	43669339	-	CLIPPED	refGene	NM_004046	ATP5A1	43664109	43678319	-	Homo sapiens ATP synthase, H+ transporting, mitochondrial F1 complex, alpha subunit 1, cardiac muscle (ATP5A1), nuclear gene encoding mitochondrial protein, transcript variant 2, mRNA.	10	11	5	2	9	6	2	3	18	6	6	3.30579	6.62495	1.52207	4.28663	1.83335	3.51456	3.54212	9.0849	13.7394	4.47861	6.54108	2.4077	7.47723	2.1275	0.102467	0
srna371898	AAGCTAGCTCAGTCGGTAGAGCATGGGACTC	31	1	chr18	43669310	43669339	-	CLIPPED	refGene	NM_001001937	ATP5A1	43664109	43684199	-	Homo sapiens ATP synthase, H+ transporting, mitochondrial F1 complex, alpha subunit 1, cardiac muscle (ATP5A1), nuclear gene encoding mitochondrial protein, transcript variant 1, mRNA.	8	14	9		7	3	4	4	6	15	23	5.95041	5.15274	0	2.14332	3.6667	3.38263	13.5781	11.5626	4.5798	11.1965	5.23286	3.21027	9.22999	2.72864	0.0296419	0
srna371898	AAGCTAGCTCAGTCGGTAGAGCATGGGACTC	31	1	chr18	43669310	43669339	-	CLIPPED	refGene	NM_004046	ATP5A1	43664109	43678319	-	Homo sapiens ATP synthase, H+ transporting, mitochondrial F1 complex, alpha subunit 1, cardiac muscle (ATP5A1), nuclear gene encoding mitochondrial protein, transcript variant 2, mRNA.	8	14	9		7	3	4	4	6	15	23	5.95041	5.15274	0	2.14332	3.6667	3.38263	13.5781	11.5626	4.5798	11.1965	5.23286	3.21027	9.22999	2.72864	0.0296419	0
srna371900	AAGCTAGCTCAGTCGGTAGAGCATGGGACTCT	32	1	chr18	43669309	43669339	-	CLIPPED	refGene	NM_001001937	ATP5A1	43664109	43684199	-	Homo sapiens ATP synthase, H+ transporting, mitochondrial F1 complex, alpha subunit 1, cardiac muscle (ATP5A1), nuclear gene encoding mitochondrial protein, transcript variant 1, mRNA.	16	11	1	4	6	3	4	6	17	7	5	0.661157	4.41664	3.04414	2.14332	3.6667	2.78639	2.95177	9.0849	12.9761	5.22505	10.4657	4.81541	8.14071	2.9216	0.0381794	0
srna371900	AAGCTAGCTCAGTCGGTAGAGCATGGGACTCT	32	1	chr18	43669309	43669339	-	CLIPPED	refGene	NM_004046	ATP5A1	43664109	43678319	-	Homo sapiens ATP synthase, H+ transporting, mitochondrial F1 complex, alpha subunit 1, cardiac muscle (ATP5A1), nuclear gene encoding mitochondrial protein, transcript variant 2, mRNA.	16	11	1	4	6	3	4	6	17	7	5	0.661157	4.41664	3.04414	2.14332	3.6667	2.78639	2.95177	9.0849	12.9761	5.22505	10.4657	4.81541	8.14071	2.9216	0.0381794	0
srna4596967	GTTTGCTGAAGCCAGATGCAATTTCTGAGA	30	1	chr12	57037467	57037496	-	EXACT	refGene	NM_001686	ATP5B	57031958	57039852	-	Homo sapiens ATP synthase, H+ transporting, mitochondrial F1 complex, beta polypeptide (ATP5B), nuclear gene encoding mitochondrial protein, mRNA.	44	29	47	58	31	44	31	24	26	17	23	31.0744	22.8193	44.14	31.4353	28.4169	31.5772	13.5781	23.9511	19.8458	12.6894	28.7807	19.2616	19.769	0.626055	0.0351499	0
srna6188002	TTTGCTGAAGCCAGATGCAATTTCTGAGA	29	1	chr12	57037467	57037495	-	EXACT	refGene	NM_001686	ATP5B	57031958	57039852	-	Homo sapiens ATP synthase, H+ transporting, mitochondrial F1 complex, beta polypeptide (ATP5B), nuclear gene encoding mitochondrial protein, mRNA.	41	38	52	44	28	34	25	27	28	18	16	34.3802	20.611	33.4855	24.2909	22.9169	27.1369	9.44566	31.3842	21.3724	13.4358	26.8184	21.6693	20.4913	0.755109	0.221527	0
srna5980172	TTCTTCTGAGTTTGCTGAAGCCACATTTAGGTAC	34	1	chr12	57038819	57038852	-	EXACT	refGene	NM_001686	ATP5B	57031958	57039852	-	Homo sapiens ATP synthase, H+ transporting, mitochondrial F1 complex, beta polypeptide (ATP5B), nuclear gene encoding mitochondrial protein, mRNA.	44	93	53	52	10	28	24	20	16	15	4	35.0413	7.36106	39.5738	20.0043	22.0002	24.7961	2.36141	76.8087	12.2128	11.1965	28.7807	16.0514	26.272	1.05952	0.92267	0
srna4550614	GTTCTTCTGAGTTTGCTGAAGCCACATTTAGGTAC	35	1	chr12	57038819	57038853	-	EXACT	refGene	NM_001686	ATP5B	57031958	57039852	-	Homo sapiens ATP synthase, H+ transporting, mitochondrial F1 complex, beta polypeptide (ATP5B), nuclear gene encoding mitochondrial protein, mRNA.	56	41	45	53	5	21	13	18	14	5	9	29.7521	3.68053	40.3349	15.0032	11.9168	20.1375	5.31318	33.8619	10.6862	3.73218	36.63	14.4462	18.0447	0.896075	0.834617	0
srna6187983	TTTGCTGAAGCCACATTTAGGTACTGAGA	29	1	chr12	57038814	57038842	-	EXACT	refGene	NM_001686	ATP5B	57031958	57039852	-	Homo sapiens ATP synthase, H+ transporting, mitochondrial F1 complex, beta polypeptide (ATP5B), nuclear gene encoding mitochondrial protein, mRNA.	16	32	19	18	15	20	12	13	6		3	12.562	11.0416	13.6986	14.2888	11.0001	12.5182	1.77106	26.4288	4.5798	0	10.4657	10.4334	8.64908	0.69092	0.466617	0
srna2951852	CTCACTGATGAGTACGTTCTGACTTTCGTTCTTCTGAGT	39	1	chr12	57037495	57037533	-	EXACT	refGene	NM_001686	ATP5B	57031958	57039852	-	Homo sapiens ATP synthase, H+ transporting, mitochondrial F1 complex, beta polypeptide (ATP5B), nuclear gene encoding mitochondrial protein, mRNA.	40	63	23	20	7	18	9	16	14	26	8	15.2066	5.15274	15.2207	12.8599	8.25007	11.338	4.72283	52.0317	10.6862	19.4073	26.1643	12.8411	22.6025	1.99351	0.246747	0
srna2951805	CTCACTGATGAGTACG	16	1	chr12	57037518	57037533	-	EXACT	refGene	NM_001686	ATP5B	57031958	57039852	-	Homo sapiens ATP synthase, H+ transporting, mitochondrial F1 complex, beta polypeptide (ATP5B), nuclear gene encoding mitochondrial protein, mRNA.	3	20	13	9	5	5	22	26	12	10	3	8.59504	3.68053	6.84932	3.57219	20.1668	8.57278	1.77106	16.518	9.15961	7.46436	1.96232	20.8668	7.37507	0.860289	0.776956	0
srna3209420	CTTCTATGATGATTTTATCA	20	1	chr12	57038865	57038884	-	EXACT	refGene	NM_001686	ATP5B	57031958	57039852	-	Homo sapiens ATP synthase, H+ transporting, mitochondrial F1 complex, beta polypeptide (ATP5B), nuclear gene encoding mitochondrial protein, mRNA.	4	37	18	7	7	6	16	26	17	8	1	11.9008	5.15274	5.32725	4.28663	14.6668	8.26685	0.590354	30.5583	12.9761	5.97149	2.61643	20.8668	10.5425	1.27528	0.711419	0
srna2951842	CTCACTGATGAGTACGTTCTGACTTTCGTTC	31	1	chr12	57037503	57037533	-	EXACT	refGene	NM_001686	ATP5B	57031958	57039852	-	Homo sapiens ATP synthase, H+ transporting, mitochondrial F1 complex, beta polypeptide (ATP5B), nuclear gene encoding mitochondrial protein, mRNA.	1	12	22	8	5	5	13	14	13	13	6	14.5455	3.68053	6.08828	3.57219	11.9168	7.96064	3.54212	9.9108	9.92291	9.70366	0.654108	11.236	6.74672	0.847509	0.693579	0
srna5308410	TCTTCTGAGTTTGCTGAAGCCACATTTAGGTACTGAGA	38	1	chr12	57038814	57038851	-	EXACT	refGene	NM_001686	ATP5B	57031958	57039852	-	Homo sapiens ATP synthase, H+ transporting, mitochondrial F1 complex, beta polypeptide (ATP5B), nuclear gene encoding mitochondrial protein, mRNA.	9	22	14	12	5	15	3	5	8	2		9.2562	3.68053	9.13242	10.7166	2.75002	7.10715	0	18.1698	6.1064	1.49287	5.88697	4.01284	6.33121	0.890823	0.835684	0
srna5517529	TGCTGAAGCCAGATGCAATTTCTGAGA	27	1	chr12	57037467	57037493	-	EXACT	refGene	NM_001686	ATP5B	57031958	57039852	-	Homo sapiens ATP synthase, H+ transporting, mitochondrial F1 complex, beta polypeptide (ATP5B), nuclear gene encoding mitochondrial protein, mRNA.	7	14	13	14	8	8	5	8	16	11	1	8.59504	5.88885	10.6545	5.71551	4.58337	7.08745	0.590354	11.5626	12.2128	8.21079	4.57875	6.42055	7.43106	1.04848	0.893108	0
srna3209448	CTTCTATGATGATTTTATCAAAATGACTTTCGTTCTTC	38	1	chr12	57038847	57038884	-	EXACT	refGene	NM_001686	ATP5B	57031958	57039852	-	Homo sapiens ATP synthase, H+ transporting, mitochondrial F1 complex, beta polypeptide (ATP5B), nuclear gene encoding mitochondrial protein, mRNA.	43	28	12	11	8	6	9	11	16	14	8	7.93388	5.88885	8.37139	4.28663	8.25007	6.94616	4.72283	23.1252	12.2128	10.4501	28.1266	8.82825	15.7275	2.2642	0.110525	0
srna1375698	AGTTTGCTGAAGCCAGATGCAATTTCTGAGA	31	1	chr12	57037467	57037497	-	EXACT	refGene	NM_001686	ATP5B	57031958	57039852	-	Homo sapiens ATP synthase, H+ transporting, mitochondrial F1 complex, beta polypeptide (ATP5B), nuclear gene encoding mitochondrial protein, mRNA.	4	8	20	7	6	6	5	5	9	7	3	13.2231	4.41664	5.32725	4.28663	4.58337	6.36741	1.77106	6.6072	6.8697	5.22505	2.61643	4.01284	4.61789	0.725239	0.415077	0
srna2951810	CTCACTGATGAGTACGTT	18	1	chr12	57037516	57037533	-	EXACT	refGene	NM_001686	ATP5B	57031958	57039852	-	Homo sapiens ATP synthase, H+ transporting, mitochondrial F1 complex, beta polypeptide (ATP5B), nuclear gene encoding mitochondrial protein, mRNA.	5	11	11	5	6	5	13	29	6	4	8	7.27273	4.41664	3.80518	3.57219	11.9168	6.1967	4.72283	9.0849	4.5798	2.98574	3.27054	23.2745	4.92876	0.795385	0.529449	0
srna2951835	CTCACTGATGAGTACGTTCTGACTTTCG	28	1	chr12	57037506	57037533	-	EXACT	refGene	NM_001686	ATP5B	57031958	57039852	-	Homo sapiens ATP synthase, H+ transporting, mitochondrial F1 complex, beta polypeptide (ATP5B), nuclear gene encoding mitochondrial protein, mRNA.	5	16	25	2	8	6	3	16	23	12	21	16.5289	5.88885	1.52207	4.28663	2.75002	6.1953	12.3974	13.2144	17.5559	8.95723	3.27054	12.8411	11.0791	1.78831	0.211449	0
srna2951815	CTCACTGATGAGTACGTTC	19	1	chr12	57037515	57037533	-	EXACT	refGene	NM_001686	ATP5B	57031958	57039852	-	Homo sapiens ATP synthase, H+ transporting, mitochondrial F1 complex, beta polypeptide (ATP5B), nuclear gene encoding mitochondrial protein, mRNA.	2	29	18	9	3	2	8	36	15	11	4	11.9008	2.20832	6.84932	1.42888	7.33339	5.94415	2.36141	23.9511	11.4495	8.21079	1.30822	28.8925	9.45621	1.59084	0.466418	0
srna2951806	CTCACTGATGAGTACGT	17	1	chr12	57037517	57037533	-	EXACT	refGene	NM_001686	ATP5B	57031958	57039852	-	Homo sapiens ATP synthase, H+ transporting, mitochondrial F1 complex, beta polypeptide (ATP5B), nuclear gene encoding mitochondrial protein, mRNA.	14	11	12	5	3	4	13	19	4	16	13	7.93388	2.20832	3.80518	2.85776	11.9168	5.74438	7.6746	9.0849	3.0532	11.943	9.15751	15.2488	8.18264	1.42446	0.33033	0
srna2951818	CTCACTGATGAGTACGTTCT	20	1	chr12	57037514	57037533	-	EXACT	refGene	NM_001686	ATP5B	57031958	57039852	-	Homo sapiens ATP synthase, H+ transporting, mitochondrial F1 complex, beta polypeptide (ATP5B), nuclear gene encoding mitochondrial protein, mRNA.	2	21	13	9	2	3	9	22	7	3	2	8.59504	1.47221	6.84932	2.14332	8.25007	5.46199	1.18071	17.3439	5.3431	2.23931	1.30822	17.6565	5.48305	1.00386	0.995288	0
srna3566231	GAGTTTGCTGAAGCCAGATGCAATTTCTGAGA	32	1	chr12	57037467	57037498	-	EXACT	refGene	NM_001686	ATP5B	57031958	57039852	-	Homo sapiens ATP synthase, H+ transporting, mitochondrial F1 complex, beta polypeptide (ATP5B), nuclear gene encoding mitochondrial protein, mRNA.	10	6	11	6	4	7	4	3	8	6	3	7.27273	2.94442	4.56621	5.00107	3.6667	4.69023	1.77106	4.9554	6.1064	4.47861	6.54108	2.4077	4.77051	1.01712	0.944447	0
srna2951847	CTCACTGATGAGTACGTTCTGACTTTCGTTCTTCT	35	1	chr12	57037499	57037533	-	EXACT	refGene	NM_001686	ATP5B	57031958	57039852	-	Homo sapiens ATP synthase, H+ transporting, mitochondrial F1 complex, beta polypeptide (ATP5B), nuclear gene encoding mitochondrial protein, mRNA.	6	9	10	7	3	3	6	6	9	11	2	6.61157	2.20832	5.32725	2.14332	5.50005	4.3581	1.18071	7.4331	6.8697	8.21079	3.92465	4.81541	5.52379	1.26748	0.488308	0
srna2951825	CTCACTGATGAGTACGTTCTGA	22	1	chr12	57037512	57037533	-	EXACT	refGene	NM_001686	ATP5B	57031958	57039852	-	Homo sapiens ATP synthase, H+ transporting, mitochondrial F1 complex, beta polypeptide (ATP5B), nuclear gene encoding mitochondrial protein, mRNA.	2	15	4	7	4	3	6	9	14	6	3	2.64463	2.94442	5.32725	2.14332	5.50005	3.71193	1.77106	12.3885	10.6862	4.47861	1.30822	7.22311	6.12652	1.65049	0.362222	0
srna2502299	CCTCACTGATGAGTACGTTCTGACTTTCGTTCTTCTGAG	39	1	chr12	57037496	57037534	-	EXACT	refGene	NM_001686	ATP5B	57031958	57039852	-	Homo sapiens ATP synthase, H+ transporting, mitochondrial F1 complex, beta polypeptide (ATP5B), nuclear gene encoding mitochondrial protein, mRNA.	7	7	10	8	1		3	2	6	5	3	6.61157	0.736106	6.08828	0	2.75002	3.2372	1.77106	5.7813	4.5798	3.73218	4.57875	1.60514	4.08862	1.26301	0.592786	0
srna3952790	GCTGAAGCCAGATGCAATTTCTGAGA	26	1	chr12	57037467	57037492	-	EXACT	refGene	NM_001686	ATP5B	57031958	57039852	-	Homo sapiens ATP synthase, H+ transporting, mitochondrial F1 complex, beta polypeptide (ATP5B), nuclear gene encoding mitochondrial protein, mRNA.	4	5	10	4	1		6	7	2	5	3	6.61157	0.736106	3.04414	0	5.50005	3.17837	1.77106	4.1295	1.5266	3.73218	2.61643	5.61798	2.75515	0.866844	0.772351	0
srna2871710	CGTTCTTCTGAGTTTGCTGAAGCCACATTTAGGTACTG	38	1	chr12	57038817	57038854	-	EXACT	refGene	NM_001686	ATP5B	57031958	57039852	-	Homo sapiens ATP synthase, H+ transporting, mitochondrial F1 complex, beta polypeptide (ATP5B), nuclear gene encoding mitochondrial protein, mRNA.	3	13	6	4	4	4	2	4	5	2		3.96694	2.94442	3.04414	2.85776	1.83335	2.92932	0	10.7367	3.8165	1.49287	1.96232	3.21027	3.60168	1.22953	0.742224	0
srna2951827	CTCACTGATGAGTACGTTCTGACT	24	1	chr12	57037510	57037533	-	EXACT	refGene	NM_001686	ATP5B	57031958	57039852	-	Homo sapiens ATP synthase, H+ transporting, mitochondrial F1 complex, beta polypeptide (ATP5B), nuclear gene encoding mitochondrial protein, mRNA.	2	12	6	7	1	1	3	9	9	1	2	3.96694	0.736106	5.32725	0.714439	2.75002	2.69895	1.18071	9.9108	6.8697	0.746436	1.30822	7.22311	4.00317	1.48323	0.551702	0
srna5960650	TTCTATGATGATTTTATCAAAATGACTTTCGTTCTTC	37	1	chr12	57038847	57038883	-	EXACT	refGene	NM_001686	ATP5B	57031958	57039852	-	Homo sapiens ATP synthase, H+ transporting, mitochondrial F1 complex, beta polypeptide (ATP5B), nuclear gene encoding mitochondrial protein, mRNA.	5	12	5	7		4		2	7	6	3	3.30579	0	5.32725	2.85776	0	2.29816	1.77106	9.9108	5.3431	4.47861	3.27054	1.60514	4.95482	2.156	0.163493	0
srna2951844	CTCACTGATGAGTACGTTCTGACTTTCGTTCTT	33	1	chr12	57037501	57037533	-	EXACT	refGene	NM_001686	ATP5B	57031958	57039852	-	Homo sapiens ATP synthase, H+ transporting, mitochondrial F1 complex, beta polypeptide (ATP5B), nuclear gene encoding mitochondrial protein, mRNA.	3	4	5	4		3	3	2	4	2	16	3.30579	0	3.04414	2.14332	2.75002	2.24865	9.44566	3.3036	3.0532	1.49287	1.96232	1.60514	3.85153	1.71282	0.34747	0
srna2951824	CTCACTGATGAGTACGTTCTG	21	1	chr12	57037513	57037533	-	EXACT	refGene	NM_001686	ATP5B	57031958	57039852	-	Homo sapiens ATP synthase, H+ transporting, mitochondrial F1 complex, beta polypeptide (ATP5B), nuclear gene encoding mitochondrial protein, mRNA.		9	2	1	1	2	5	13	6	1		1.32231	0.736106	0.761035	1.42888	4.58337	1.76634	0	7.4331	4.5798	0.746436	0	10.4334	2.55187	1.44472	0.651775	0
srna6240802	TTTTGTGTCTCCCATTCCCCAG	22	1	chr17	40666285	40666306	+	EXACT	refGene	NM_001130020	ATP6V0A1	40610861	40674597	+	Homo sapiens ATPase, H+ transporting, lysosomal V0 subunit a1 (ATP6V0A1), transcript variant 1, mRNA.	3	5	8	5	12	5	6	4	6	1	2	5.28926	8.83327	3.80518	3.57219	5.50005	5.39999	1.18071	4.1295	4.5798	0.746436	1.96232	3.21027	2.51975	0.466622	0.0470066	0
srna6240802	TTTTGTGTCTCCCATTCCCCAG	22	1	chr17	40666285	40666306	+	EXACT	refGene	NM_001130021	ATP6V0A1	40610861	40674597	+	Homo sapiens ATPase, H+ transporting, lysosomal V0 subunit a1 (ATP6V0A1), transcript variant 2, mRNA.	3	5	8	5	12	5	6	4	6	1	2	5.28926	8.83327	3.80518	3.57219	5.50005	5.39999	1.18071	4.1295	4.5798	0.746436	1.96232	3.21027	2.51975	0.466622	0.0470066	0
srna6240802	TTTTGTGTCTCCCATTCCCCAG	22	1	chr17	40666285	40666306	+	EXACT	refGene	NM_005177	ATP6V0A1	40610861	40674597	+	Homo sapiens ATPase, H+ transporting, lysosomal V0 subunit a1 (ATP6V0A1), transcript variant 3, mRNA.	3	5	8	5	12	5	6	4	6	1	2	5.28926	8.83327	3.80518	3.57219	5.50005	5.39999	1.18071	4.1295	4.5798	0.746436	1.96232	3.21027	2.51975	0.466622	0.0470066	0
srna6240803	TTTTGTGTCTCCCATTCCCCAGA	23	1	chr17	40666285	40666307	+	EXACT	refGene	NM_001130020	ATP6V0A1	40610861	40674597	+	Homo sapiens ATPase, H+ transporting, lysosomal V0 subunit a1 (ATP6V0A1), transcript variant 1, mRNA.	3	7	4	6	11	6	5	5	3	1	1	2.64463	8.09717	4.56621	4.28663	4.58337	4.8356	0.590354	5.7813	2.2899	0.746436	1.96232	4.01284	2.27406	0.470275	0.0830222	0
srna6240803	TTTTGTGTCTCCCATTCCCCAGA	23	1	chr17	40666285	40666307	+	EXACT	refGene	NM_001130021	ATP6V0A1	40610861	40674597	+	Homo sapiens ATPase, H+ transporting, lysosomal V0 subunit a1 (ATP6V0A1), transcript variant 2, mRNA.	3	7	4	6	11	6	5	5	3	1	1	2.64463	8.09717	4.56621	4.28663	4.58337	4.8356	0.590354	5.7813	2.2899	0.746436	1.96232	4.01284	2.27406	0.470275	0.0830222	0
srna6240803	TTTTGTGTCTCCCATTCCCCAGA	23	1	chr17	40666285	40666307	+	EXACT	refGene	NM_005177	ATP6V0A1	40610861	40674597	+	Homo sapiens ATPase, H+ transporting, lysosomal V0 subunit a1 (ATP6V0A1), transcript variant 3, mRNA.	3	7	4	6	11	6	5	5	3	1	1	2.64463	8.09717	4.56621	4.28663	4.58337	4.8356	0.590354	5.7813	2.2899	0.746436	1.96232	4.01284	2.27406	0.470275	0.0830222	0
srna3037429	CTCTGGCGCAATGGA	15	1	chr20	3064524	3064538	+	EXACT	refGene	NM_000490	AVP	3063201	3065370	-	Homo sapiens arginine vasopressin (AVP), mRNA.	26	8	16	11	19	7	10	18	6	14	19	10.5785	13.986	8.37139	5.00107	9.16674	9.42075	11.2167	6.6072	4.5798	10.4501	17.0068	14.4462	9.97213	1.05853	0.83765	0
srna5258131	TCTCTGGCGCAATGGA	16	1	chr20	3064523	3064538	+	EXACT	refGene	NM_000490	AVP	3063201	3065370	-	Homo sapiens arginine vasopressin (AVP), mRNA.	6	2	6	4	4	8	2	11	3	14	14	3.96694	2.94442	3.04414	5.71551	1.83335	3.50087	8.26495	1.6518	2.2899	10.4501	3.92465	8.82825	5.31628	1.51856	0.369137	0
srna6156216	TTTCCGGCTCGCGTGGGTGTGT	22	1	chr17	19247826	19247847	-	EXACT	refGene	NM_001243473	B9D1	19246482	19266046	-	Homo sapiens B9 protein domain 1 (B9D1), transcript variant 1, mRNA.	605	333	936	855	1170	559	675	752	645	727	487	618.843	861.244	650.685	399.371	618.755	629.78	287.502	275.025	492.329	542.659	395.735	603.531	398.65	0.632999	0.0368043	1
srna6156216	TTTCCGGCTCGCGTGGGTGTGT	22	1	chr17	19247826	19247847	-	EXACT	refGene	NM_001243475	B9D1	19240866	19281495	-	Homo sapiens B9 protein domain 1 (B9D1), transcript variant 3, mRNA.	605	333	936	855	1170	559	675	752	645	727	487	618.843	861.244	650.685	399.371	618.755	629.78	287.502	275.025	492.329	542.659	395.735	603.531	398.65	0.632999	0.0368043	1
srna6156216	TTTCCGGCTCGCGTGGGTGTGT	22	1	chr17	19247826	19247847	-	EXACT	refGene	NM_015681	B9D1	19246482	19266046	-	Homo sapiens B9 protein domain 1 (B9D1), transcript variant 2, mRNA.	605	333	936	855	1170	559	675	752	645	727	487	618.843	861.244	650.685	399.371	618.755	629.78	287.502	275.025	492.329	542.659	395.735	603.531	398.65	0.632999	0.0368043	1
srna6156199	TTTCCGGCTCGCGTGGGTGTG	21	1	chr17	19247827	19247847	-	EXACT	refGene	NM_001243473	B9D1	19246482	19266046	-	Homo sapiens B9 protein domain 1 (B9D1), transcript variant 1, mRNA.	52	34	67	76	128	61	58	76	50	54	47	44.2975	94.2216	57.8387	43.5808	53.1671	58.6211	27.7466	28.0806	38.165	40.3075	34.0136	60.9952	33.6627	0.574241	0.0530061	0
srna6156199	TTTCCGGCTCGCGTGGGTGTG	21	1	chr17	19247827	19247847	-	EXACT	refGene	NM_001243475	B9D1	19240866	19281495	-	Homo sapiens B9 protein domain 1 (B9D1), transcript variant 3, mRNA.	52	34	67	76	128	61	58	76	50	54	47	44.2975	94.2216	57.8387	43.5808	53.1671	58.6211	27.7466	28.0806	38.165	40.3075	34.0136	60.9952	33.6627	0.574241	0.0530061	0
srna6156199	TTTCCGGCTCGCGTGGGTGTG	21	1	chr17	19247827	19247847	-	EXACT	refGene	NM_015681	B9D1	19246482	19266046	-	Homo sapiens B9 protein domain 1 (B9D1), transcript variant 2, mRNA.	52	34	67	76	128	61	58	76	50	54	47	44.2975	94.2216	57.8387	43.5808	53.1671	58.6211	27.7466	28.0806	38.165	40.3075	34.0136	60.9952	33.6627	0.574241	0.0530061	0
srna6156185	TTTCCGGCTCGCGTGGGTGT	20	1	chr17	19247828	19247847	-	EXACT	refGene	NM_001243473	B9D1	19246482	19266046	-	Homo sapiens B9 protein domain 1 (B9D1), transcript variant 1, mRNA.	37	27	49	32	88	39	53	41	39	38	40	32.3967	64.7773	24.3531	27.8631	48.5837	39.5948	23.6141	22.2993	29.7687	28.3646	24.202	32.9053	25.6497	0.647806	0.138518	0
srna6156185	TTTCCGGCTCGCGTGGGTGT	20	1	chr17	19247828	19247847	-	EXACT	refGene	NM_001243475	B9D1	19240866	19281495	-	Homo sapiens B9 protein domain 1 (B9D1), transcript variant 3, mRNA.	37	27	49	32	88	39	53	41	39	38	40	32.3967	64.7773	24.3531	27.8631	48.5837	39.5948	23.6141	22.2993	29.7687	28.3646	24.202	32.9053	25.6497	0.647806	0.138518	0
srna6156185	TTTCCGGCTCGCGTGGGTGT	20	1	chr17	19247828	19247847	-	EXACT	refGene	NM_015681	B9D1	19246482	19266046	-	Homo sapiens B9 protein domain 1 (B9D1), transcript variant 2, mRNA.	37	27	49	32	88	39	53	41	39	38	40	32.3967	64.7773	24.3531	27.8631	48.5837	39.5948	23.6141	22.2993	29.7687	28.3646	24.202	32.9053	25.6497	0.647806	0.138518	0
srna5929808	TTCCGGCTCGCGTGGGTGTGT	21	1	chr17	19247826	19247846	-	EXACT	refGene	NM_001243473	B9D1	19246482	19266046	-	Homo sapiens B9 protein domain 1 (B9D1), transcript variant 1, mRNA.	26	17	29	26	50	23	39	20	32	24	22	19.1736	36.8053	19.7869	16.4321	35.7503	25.5896	12.9878	14.0403	24.4256	17.9145	17.0068	16.0514	17.275	0.675078	0.140116	0
srna5929808	TTCCGGCTCGCGTGGGTGTGT	21	1	chr17	19247826	19247846	-	EXACT	refGene	NM_001243475	B9D1	19240866	19281495	-	Homo sapiens B9 protein domain 1 (B9D1), transcript variant 3, mRNA.	26	17	29	26	50	23	39	20	32	24	22	19.1736	36.8053	19.7869	16.4321	35.7503	25.5896	12.9878	14.0403	24.4256	17.9145	17.0068	16.0514	17.275	0.675078	0.140116	0
srna5929808	TTCCGGCTCGCGTGGGTGTGT	21	1	chr17	19247826	19247846	-	EXACT	refGene	NM_015681	B9D1	19246482	19266046	-	Homo sapiens B9 protein domain 1 (B9D1), transcript variant 2, mRNA.	26	17	29	26	50	23	39	20	32	24	22	19.1736	36.8053	19.7869	16.4321	35.7503	25.5896	12.9878	14.0403	24.4256	17.9145	17.0068	16.0514	17.275	0.675078	0.140116	0
srna6156169	TTTCCGGCTCGCGTGGGTG	19	1	chr17	19247829	19247847	-	EXACT	refGene	NM_001243473	B9D1	19246482	19266046	-	Homo sapiens B9 protein domain 1 (B9D1), transcript variant 1, mRNA.	5	12	12	19	13	7	10	11	11	8	5	7.93388	9.56938	14.4597	5.00107	9.16674	9.22615	2.95177	9.9108	8.39631	5.97149	3.27054	8.82825	6.10018	0.661184	0.167831	0
srna6156169	TTTCCGGCTCGCGTGGGTG	19	1	chr17	19247829	19247847	-	EXACT	refGene	NM_001243475	B9D1	19240866	19281495	-	Homo sapiens B9 protein domain 1 (B9D1), transcript variant 3, mRNA.	5	12	12	19	13	7	10	11	11	8	5	7.93388	9.56938	14.4597	5.00107	9.16674	9.22615	2.95177	9.9108	8.39631	5.97149	3.27054	8.82825	6.10018	0.661184	0.167831	0
srna6156169	TTTCCGGCTCGCGTGGGTG	19	1	chr17	19247829	19247847	-	EXACT	refGene	NM_015681	B9D1	19246482	19266046	-	Homo sapiens B9 protein domain 1 (B9D1), transcript variant 2, mRNA.	5	12	12	19	13	7	10	11	11	8	5	7.93388	9.56938	14.4597	5.00107	9.16674	9.22615	2.95177	9.9108	8.39631	5.97149	3.27054	8.82825	6.10018	0.661184	0.167831	0
srna6156123	TTTCCGGCTCGCGTGGG	17	1	chr17	19247831	19247847	-	EXACT	refGene	NM_001243473	B9D1	19246482	19266046	-	Homo sapiens B9 protein domain 1 (B9D1), transcript variant 1, mRNA.	11	2	15	5	14	9	7	3	9	6	9	9.91736	10.3055	3.80518	6.42995	6.41672	7.37494	5.31318	1.6518	6.8697	4.47861	7.19519	2.4077	5.1017	0.691762	0.187703	0
srna6156123	TTTCCGGCTCGCGTGGG	17	1	chr17	19247831	19247847	-	EXACT	refGene	NM_001243475	B9D1	19240866	19281495	-	Homo sapiens B9 protein domain 1 (B9D1), transcript variant 3, mRNA.	11	2	15	5	14	9	7	3	9	6	9	9.91736	10.3055	3.80518	6.42995	6.41672	7.37494	5.31318	1.6518	6.8697	4.47861	7.19519	2.4077	5.1017	0.691762	0.187703	0
srna6156123	TTTCCGGCTCGCGTGGG	17	1	chr17	19247831	19247847	-	EXACT	refGene	NM_015681	B9D1	19246482	19266046	-	Homo sapiens B9 protein domain 1 (B9D1), transcript variant 2, mRNA.	11	2	15	5	14	9	7	3	9	6	9	9.91736	10.3055	3.80518	6.42995	6.41672	7.37494	5.31318	1.6518	6.8697	4.47861	7.19519	2.4077	5.1017	0.691762	0.187703	0
srna5133297	TCCGGCTCGCGTGGGTGTGT	20	1	chr17	19247826	19247845	-	EXACT	refGene	NM_001243473	B9D1	19246482	19266046	-	Homo sapiens B9 protein domain 1 (B9D1), transcript variant 1, mRNA.	2	12	13	8	10	3	7	6	6	5	3	8.59504	7.36106	6.08828	2.14332	6.41672	6.12088	1.77106	9.9108	4.5798	3.73218	1.30822	4.81541	4.26041	0.696045	0.354786	0
srna5133297	TCCGGCTCGCGTGGGTGTGT	20	1	chr17	19247826	19247845	-	EXACT	refGene	NM_001243475	B9D1	19240866	19281495	-	Homo sapiens B9 protein domain 1 (B9D1), transcript variant 3, mRNA.	2	12	13	8	10	3	7	6	6	5	3	8.59504	7.36106	6.08828	2.14332	6.41672	6.12088	1.77106	9.9108	4.5798	3.73218	1.30822	4.81541	4.26041	0.696045	0.354786	0
srna5133297	TCCGGCTCGCGTGGGTGTGT	20	1	chr17	19247826	19247845	-	EXACT	refGene	NM_015681	B9D1	19246482	19266046	-	Homo sapiens B9 protein domain 1 (B9D1), transcript variant 2, mRNA.	2	12	13	8	10	3	7	6	6	5	3	8.59504	7.36106	6.08828	2.14332	6.41672	6.12088	1.77106	9.9108	4.5798	3.73218	1.30822	4.81541	4.26041	0.696045	0.354786	0
srna6156155	TTTCCGGCTCGCGTGGGT	18	1	chr17	19247830	19247847	-	EXACT	refGene	NM_001243473	B9D1	19246482	19266046	-	Homo sapiens B9 protein domain 1 (B9D1), transcript variant 1, mRNA.	8	4	4	9	6	5	7	10	5	5	6	2.64463	4.41664	6.84932	3.57219	6.41672	4.7799	3.54212	3.3036	3.8165	3.73218	5.23286	8.02568	3.92545	0.821242	0.372135	0
srna6156155	TTTCCGGCTCGCGTGGGT	18	1	chr17	19247830	19247847	-	EXACT	refGene	NM_001243475	B9D1	19240866	19281495	-	Homo sapiens B9 protein domain 1 (B9D1), transcript variant 3, mRNA.	8	4	4	9	6	5	7	10	5	5	6	2.64463	4.41664	6.84932	3.57219	6.41672	4.7799	3.54212	3.3036	3.8165	3.73218	5.23286	8.02568	3.92545	0.821242	0.372135	0
srna6156155	TTTCCGGCTCGCGTGGGT	18	1	chr17	19247830	19247847	-	EXACT	refGene	NM_015681	B9D1	19246482	19266046	-	Homo sapiens B9 protein domain 1 (B9D1), transcript variant 2, mRNA.	8	4	4	9	6	5	7	10	5	5	6	2.64463	4.41664	6.84932	3.57219	6.41672	4.7799	3.54212	3.3036	3.8165	3.73218	5.23286	8.02568	3.92545	0.821242	0.372135	0
srna5680286	TGGTTAAGGCATTGGA	16	1	chr6	69914393	69914408	+	EXACT	refGene	NM_001704	BAI3	69345631	70099403	+	Homo sapiens brain-specific angiogenesis inhibitor 3 (BAI3), mRNA.	11	7	2	3	7		2	4	2	3	3	1.32231	5.15274	2.28311	0	1.83335	2.1183	1.77106	5.7813	1.5266	2.23931	7.19519	3.21027	3.70269	1.74795	0.306579	0
srna4494118	GTGGTTAAGGCATTGGA	17	1	chr6	69914392	69914408	+	EXACT	refGene	NM_001704	BAI3	69345631	70099403	+	Homo sapiens brain-specific angiogenesis inhibitor 3 (BAI3), mRNA.	10		2	1	2	3	2	4		2	3	1.32231	1.47221	0.761035	2.14332	1.83335	1.50645	1.77106	0	0	1.49287	6.54108	3.21027	1.961	1.30174	0.728195	0
srna2378400	CCCTCCCCGGGGGAGC	16	1	chr16	1384106	1384121	+	EXACT	refGene	NM_001199097	BAIAP3	1383605	1399442	+	Homo sapiens BAI1-associated protein 3 (BAIAP3), transcript variant 3, mRNA.	7	4	20	9	159	5	6	6	27	42	51	13.2231	117.041	6.84932	3.57219	5.50005	29.2371	30.108	3.3036	20.6091	31.3503	4.57875	4.81541	17.99	0.615313	0.644766	0
srna2378400	CCCTCCCCGGGGGAGC	16	1	chr16	1384106	1384121	+	EXACT	refGene	NM_001199098	BAIAP3	1383605	1399442	+	Homo sapiens BAI1-associated protein 3 (BAIAP3), transcript variant 4, mRNA.	7	4	20	9	159	5	6	6	27	42	51	13.2231	117.041	6.84932	3.57219	5.50005	29.2371	30.108	3.3036	20.6091	31.3503	4.57875	4.81541	17.99	0.615313	0.644766	0
srna2378400	CCCTCCCCGGGGGAGC	16	1	chr16	1384106	1384121	+	EXACT	refGene	NM_001199099	BAIAP3	1383605	1399442	+	Homo sapiens BAI1-associated protein 3 (BAIAP3), transcript variant 5, mRNA.	7	4	20	9	159	5	6	6	27	42	51	13.2231	117.041	6.84932	3.57219	5.50005	29.2371	30.108	3.3036	20.6091	31.3503	4.57875	4.81541	17.99	0.615313	0.644766	0
srna4212358	GGGGCTGGGCGCGCGCC	17	1	chr11	118781474	118781490	+	EXACT	refGene	NM_182557	BCL9L	118766850	118781613	-	Homo sapiens B-cell CLL/lymphoma 9-like (BCL9L), mRNA.		9	14	2	2	3	11	15		1	1	9.2562	1.47221	1.52207	2.14332	10.0834	4.89544	0.590354	7.4331	0	0.746436	0	12.0385	1.75398	0.358288	0.234108	0
srna1927814	CACTGTAATGCTAACTT	17	1	chrX	70776735	70776751	-	EXACT	refGene	NR_001568	BCYRN1	70430034	70948962	-	Homo sapiens brain cytoplasmic RNA 1 (non-protein coding) (BCYRN1), non-coding RNA.	106	131	105	192	71	78	65	124	98	63	44	69.4215	52.2635	146.119	55.7262	59.5838	76.6228	25.9756	108.193	74.8035	47.0255	69.3354	99.5185	65.0666	0.849181	0.620522	0
srna1927815	CACTGTAATGCTAACTTA	18	1	chrX	70776734	70776751	-	EXACT	refGene	NR_001568	BCYRN1	70430034	70948962	-	Homo sapiens brain cytoplasmic RNA 1 (non-protein coding) (BCYRN1), non-coding RNA.	14	14	13	37	53	37	31	21	36	23	19	8.59504	39.0136	28.1583	26.4342	28.4169	26.1236	11.2167	11.5626	27.4788	17.168	9.15751	16.8539	15.3167	0.586317	0.11101	0
srna4098287	GGCCCGCCGCGGGGCC	16	1	chrX	102470282	102470297	-	EXACT	refGene	NM_001080425	BEX4	102470019	102472128	+	Homo sapiens brain expressed, X-linked 4 (BEX4), transcript variant 2, mRNA.	12	14	24	8	5	13	9	32	20	7	13	15.8678	3.68053	6.08828	9.2877	8.25007	8.63487	7.6746	11.5626	15.266	5.22505	7.84929	25.6822	9.51551	1.10199	0.752818	0
srna4098287	GGCCCGCCGCGGGGCC	16	1	chrX	102470282	102470297	-	EXACT	refGene	NM_001127688	BEX4	102470019	102472128	+	Homo sapiens brain expressed, X-linked 4 (BEX4), transcript variant 1, mRNA.	12	14	24	8	5	13	9	32	20	7	13	15.8678	3.68053	6.08828	9.2877	8.25007	8.63487	7.6746	11.5626	15.266	5.22505	7.84929	25.6822	9.51551	1.10199	0.752818	0
srna4098290	GGCCCGCCGCGGGGCCC	17	1	chrX	102470281	102470297	-	EXACT	refGene	NM_001080425	BEX4	102470019	102472128	+	Homo sapiens brain expressed, X-linked 4 (BEX4), transcript variant 2, mRNA.	4	17	24	9	5	4	9	11	7	7	10	15.8678	3.68053	6.84932	2.85776	8.25007	7.50109	5.90354	14.0403	5.3431	5.22505	2.61643	8.82825	6.62569	0.883297	0.77946	0
srna4098290	GGCCCGCCGCGGGGCCC	17	1	chrX	102470281	102470297	-	EXACT	refGene	NM_001127688	BEX4	102470019	102472128	+	Homo sapiens brain expressed, X-linked 4 (BEX4), transcript variant 1, mRNA.	4	17	24	9	5	4	9	11	7	7	10	15.8678	3.68053	6.84932	2.85776	8.25007	7.50109	5.90354	14.0403	5.3431	5.22505	2.61643	8.82825	6.62569	0.883297	0.77946	0
srna2776730	CGGCGGTCGGCGGGCGGCGGGGCGGGGCGG	30	1	chr1	40254258	40254287	+	EXACT	refGene	NM_001720	BMP8B	40223902	40254533	-	Homo sapiens bone morphogenetic protein 8b (BMP8B), mRNA.	6	4	7	12	9	20	9	3	5	4	9	4.6281	6.62495	9.13242	14.2888	8.25007	8.58486	5.31318	3.3036	3.8165	2.98574	3.92465	2.4077	3.86874	0.450646	0.0416049	0
srna5169654	TCGACCTGGTATTGCAGTACCTCCAGGAACGGTGCACCA	39	1	chr10	103124607	103124643	-	CLIPPED	refGene	NM_003939	BTRC	103113789	103317078	+	Homo sapiens beta-transducin repeat containing (BTRC), transcript variant 2, mRNA.	113	126	121	18	38	94	86	57	175	115	75	80	27.972	13.6986	67.1572	78.834	53.5324	44.2765	104.063	133.578	85.8401	73.9142	45.7464	88.3344	1.65011	0.124557	0
srna5169654	TCGACCTGGTATTGCAGTACCTCCAGGAACGGTGCACCA	39	1	chr10	103124607	103124643	-	CLIPPED	refGene	NM_033637	BTRC	103113789	103317078	+	Homo sapiens beta-transducin repeat containing (BTRC), transcript variant 1, mRNA.	113	126	121	18	38	94	86	57	175	115	75	80	27.972	13.6986	67.1572	78.834	53.5324	44.2765	104.063	133.578	85.8401	73.9142	45.7464	88.3344	1.65011	0.124557	0
srna5169651	TCGACCTGGTATTGCAGTACCTCCAGGAACGGTGCAC	37	1	chr10	103124607	103124643	-	EXACT	refGene	NM_003939	BTRC	103113789	103317078	+	Homo sapiens beta-transducin repeat containing (BTRC), transcript variant 2, mRNA.	28	72	52	13	10	41	29	23	66	58	22	34.3802	7.36106	9.89346	29.292	26.5836	21.502	12.9878	59.4648	50.3778	43.2933	18.315	18.4591	36.8877	1.71555	0.191976	0
srna5169651	TCGACCTGGTATTGCAGTACCTCCAGGAACGGTGCAC	37	1	chr10	103124607	103124643	-	EXACT	refGene	NM_033637	BTRC	103113789	103317078	+	Homo sapiens beta-transducin repeat containing (BTRC), transcript variant 1, mRNA.	28	72	52	13	10	41	29	23	66	58	22	34.3802	7.36106	9.89346	29.292	26.5836	21.502	12.9878	59.4648	50.3778	43.2933	18.315	18.4591	36.8877	1.71555	0.191976	0
srna5169646	TCGACCTGGTATTGCAGTACCTCCAGGAACGGTG	34	1	chr10	103124610	103124643	-	EXACT	refGene	NM_003939	BTRC	103113789	103317078	+	Homo sapiens beta-transducin repeat containing (BTRC), transcript variant 2, mRNA.	2	18	26	5	10	16	29	10	20	7	7	17.1901	7.36106	3.80518	11.431	26.5836	13.2742	4.13248	14.8662	15.266	5.22505	1.30822	8.02568	8.15959	0.614696	0.333516	0
srna5169646	TCGACCTGGTATTGCAGTACCTCCAGGAACGGTG	34	1	chr10	103124610	103124643	-	EXACT	refGene	NM_033637	BTRC	103113789	103317078	+	Homo sapiens beta-transducin repeat containing (BTRC), transcript variant 1, mRNA.	2	18	26	5	10	16	29	10	20	7	7	17.1901	7.36106	3.80518	11.431	26.5836	13.2742	4.13248	14.8662	15.266	5.22505	1.30822	8.02568	8.15959	0.614696	0.333516	0
srna5169650	TCGACCTGGTATTGCAGTACCTCCAGGAACGGTGCA	36	1	chr10	103124608	103124643	-	EXACT	refGene	NM_003939	BTRC	103113789	103317078	+	Homo sapiens beta-transducin repeat containing (BTRC), transcript variant 2, mRNA.	6	9	24	2	2	15	15	12	14	18	5	15.8678	1.47221	1.52207	10.7166	13.7501	8.66575	2.95177	7.4331	10.6862	13.4358	3.92465	9.63082	7.68631	0.886976	0.795154	0
srna5169650	TCGACCTGGTATTGCAGTACCTCCAGGAACGGTGCA	36	1	chr10	103124608	103124643	-	EXACT	refGene	NM_033637	BTRC	103113789	103317078	+	Homo sapiens beta-transducin repeat containing (BTRC), transcript variant 1, mRNA.	6	9	24	2	2	15	15	12	14	18	5	15.8678	1.47221	1.52207	10.7166	13.7501	8.66575	2.95177	7.4331	10.6862	13.4358	3.92465	9.63082	7.68631	0.886976	0.795154	0
srna2590152	CGACCTGGTATTGCAGTACCTCCAGGAACGGTGCACCA	38	1	chr10	103124607	103124642	-	CLIPPED	refGene	NM_003939	BTRC	103113789	103317078	+	Homo sapiens beta-transducin repeat containing (BTRC), transcript variant 2, mRNA.	7	13	15	4	6	4	16	14	21	18	7	9.91736	4.41664	3.04414	2.85776	14.6668	6.98054	4.13248	10.7367	16.0293	13.4358	4.57875	11.236	9.78262	1.40141	0.421788	0
srna2590152	CGACCTGGTATTGCAGTACCTCCAGGAACGGTGCACCA	38	1	chr10	103124607	103124642	-	CLIPPED	refGene	NM_033637	BTRC	103113789	103317078	+	Homo sapiens beta-transducin repeat containing (BTRC), transcript variant 1, mRNA.	7	13	15	4	6	4	16	14	21	18	7	9.91736	4.41664	3.04414	2.85776	14.6668	6.98054	4.13248	10.7367	16.0293	13.4358	4.57875	11.236	9.78262	1.40141	0.421788	0
srna2115883	CATCGACCTGGTATTGCAGTACCTCCAGGAACGG	34	1	chr10	103124612	103124645	-	EXACT	refGene	NM_003939	BTRC	103113789	103317078	+	Homo sapiens beta-transducin repeat containing (BTRC), transcript variant 2, mRNA.	1	23	15	1	4	5	19	11	21	6	1	9.91736	2.94442	0.761035	3.57219	17.4168	6.92236	0.590354	18.9957	16.0293	4.47861	0.654108	8.82825	8.14962	1.17729	0.810925	0
srna2115883	CATCGACCTGGTATTGCAGTACCTCCAGGAACGG	34	1	chr10	103124612	103124645	-	EXACT	refGene	NM_033637	BTRC	103113789	103317078	+	Homo sapiens beta-transducin repeat containing (BTRC), transcript variant 1, mRNA.	1	23	15	1	4	5	19	11	21	6	1	9.91736	2.94442	0.761035	3.57219	17.4168	6.92236	0.590354	18.9957	16.0293	4.47861	0.654108	8.82825	8.14962	1.17729	0.810925	0
srna5169643	TCGACCTGGTATTGCAGTACCTCCAGGAACGGT	33	1	chr10	103124611	103124643	-	EXACT	refGene	NM_003939	BTRC	103113789	103317078	+	Homo sapiens beta-transducin repeat containing (BTRC), transcript variant 2, mRNA.	2	5	9	4	2	4	12	7	7	5	2	5.95041	1.47221	3.04414	2.85776	11.0001	4.86492	1.18071	4.1295	5.3431	3.73218	1.30822	5.61798	3.13874	0.645178	0.39647	0
srna5169643	TCGACCTGGTATTGCAGTACCTCCAGGAACGGT	33	1	chr10	103124611	103124643	-	EXACT	refGene	NM_033637	BTRC	103113789	103317078	+	Homo sapiens beta-transducin repeat containing (BTRC), transcript variant 1, mRNA.	2	5	9	4	2	4	12	7	7	5	2	5.95041	1.47221	3.04414	2.85776	11.0001	4.86492	1.18071	4.1295	5.3431	3.73218	1.30822	5.61798	3.13874	0.645178	0.39647	0
srna2590149	CGACCTGGTATTGCAGTACCTCCAGGAACGGTGCAC	36	1	chr10	103124607	103124642	-	EXACT	refGene	NM_003939	BTRC	103113789	103317078	+	Homo sapiens beta-transducin repeat containing (BTRC), transcript variant 2, mRNA.	6	8	11	3	2	6	9	6	11	9	5	7.27273	1.47221	2.28311	4.28663	8.25007	4.71295	2.95177	6.6072	8.39631	6.71792	3.92465	4.81541	5.71957	1.21359	0.563671	0
srna2590149	CGACCTGGTATTGCAGTACCTCCAGGAACGGTGCAC	36	1	chr10	103124607	103124642	-	EXACT	refGene	NM_033637	BTRC	103113789	103317078	+	Homo sapiens beta-transducin repeat containing (BTRC), transcript variant 1, mRNA.	6	8	11	3	2	6	9	6	11	9	5	7.27273	1.47221	2.28311	4.28663	8.25007	4.71295	2.95177	6.6072	8.39631	6.71792	3.92465	4.81541	5.71957	1.21359	0.563671	0
srna1498533	ATCGACCTGGTATTGCAGTACCTCCAGGAACGGTGCAC	38	1	chr10	103124607	103124644	-	EXACT	refGene	NM_003939	BTRC	103113789	103317078	+	Homo sapiens beta-transducin repeat containing (BTRC), transcript variant 2, mRNA.	3	14	15		5	4	6	7	10	9	9	9.91736	3.68053	0	2.85776	5.50005	4.39114	5.31318	11.5626	7.63301	6.71792	1.96232	5.61798	6.63781	1.51164	0.350732	0
srna1498533	ATCGACCTGGTATTGCAGTACCTCCAGGAACGGTGCAC	38	1	chr10	103124607	103124644	-	EXACT	refGene	NM_033637	BTRC	103113789	103317078	+	Homo sapiens beta-transducin repeat containing (BTRC), transcript variant 1, mRNA.	3	14	15		5	4	6	7	10	9	9	9.91736	3.68053	0	2.85776	5.50005	4.39114	5.31318	11.5626	7.63301	6.71792	1.96232	5.61798	6.63781	1.51164	0.350732	0
srna5169649	TCGACCTGGTATTGCAGTACCTCCAGGAACGGTGC	35	1	chr10	103124609	103124643	-	EXACT	refGene	NM_003939	BTRC	103113789	103317078	+	Homo sapiens beta-transducin repeat containing (BTRC), transcript variant 2, mRNA.	5	9	11	3	2	1	9	3	13	11	1	7.27273	1.47221	2.28311	0.714439	8.25007	3.99851	0.590354	7.4331	9.92291	8.21079	3.27054	2.4077	5.88554	1.47193	0.440222	0
srna5169649	TCGACCTGGTATTGCAGTACCTCCAGGAACGGTGC	35	1	chr10	103124609	103124643	-	EXACT	refGene	NM_033637	BTRC	103113789	103317078	+	Homo sapiens beta-transducin repeat containing (BTRC), transcript variant 1, mRNA.	5	9	11	3	2	1	9	3	13	11	1	7.27273	1.47221	2.28311	0.714439	8.25007	3.99851	0.590354	7.4331	9.92291	8.21079	3.27054	2.4077	5.88554	1.47193	0.440222	0
srna2590145	CGACCTGGTATTGCAGTACCTCCAGGAACGGTG	33	1	chr10	103124610	103124642	-	EXACT	refGene	NM_003939	BTRC	103113789	103317078	+	Homo sapiens beta-transducin repeat containing (BTRC), transcript variant 2, mRNA.	2	7	6	2		2	12	1	4	1	1	3.96694	0	1.52207	1.42888	11.0001	3.5836	0.590354	5.7813	3.0532	0.746436	1.30822	0.802568	2.2959	0.64067	0.578409	0
srna2590145	CGACCTGGTATTGCAGTACCTCCAGGAACGGTG	33	1	chr10	103124610	103124642	-	EXACT	refGene	NM_033637	BTRC	103113789	103317078	+	Homo sapiens beta-transducin repeat containing (BTRC), transcript variant 1, mRNA.	2	7	6	2		2	12	1	4	1	1	3.96694	0	1.52207	1.42888	11.0001	3.5836	0.590354	5.7813	3.0532	0.746436	1.30822	0.802568	2.2959	0.64067	0.578409	0
srna5169623	TCGACCTGGTATTGCAGTACCTCCAGGAACGG	32	1	chr10	103124612	103124643	-	EXACT	refGene	NM_003939	BTRC	103113789	103317078	+	Homo sapiens beta-transducin repeat containing (BTRC), transcript variant 2, mRNA.	2	1	12		1	3	5	4	5	5	5	7.93388	0.736106	0	2.14332	4.58337	3.07934	2.95177	0.8259	3.8165	3.73218	1.30822	3.21027	2.52691	0.820603	0.73834	0
srna5169623	TCGACCTGGTATTGCAGTACCTCCAGGAACGG	32	1	chr10	103124612	103124643	-	EXACT	refGene	NM_033637	BTRC	103113789	103317078	+	Homo sapiens beta-transducin repeat containing (BTRC), transcript variant 1, mRNA.	2	1	12		1	3	5	4	5	5	5	7.93388	0.736106	0	2.14332	4.58337	3.07934	2.95177	0.8259	3.8165	3.73218	1.30822	3.21027	2.52691	0.820603	0.73834	0
srna1698984	ATTGCAGTACCTCCAGGAACGGTGCACCA	29	1	chr10	103124607	103124633	-	CLIPPED	refGene	NM_003939	BTRC	103113789	103317078	+	Homo sapiens beta-transducin repeat containing (BTRC), transcript variant 2, mRNA.	35	4			1	1	11	6	4	6	6	0	0.736106	0	0.714439	10.0834	2.30679	3.54212	3.3036	3.0532	4.47861	22.8938	4.81541	7.45426	3.23144	0.280231	0
srna1698984	ATTGCAGTACCTCCAGGAACGGTGCACCA	29	1	chr10	103124607	103124633	-	CLIPPED	refGene	NM_033637	BTRC	103113789	103317078	+	Homo sapiens beta-transducin repeat containing (BTRC), transcript variant 1, mRNA.	35	4			1	1	11	6	4	6	6	0	0.736106	0	0.714439	10.0834	2.30679	3.54212	3.3036	3.0532	4.47861	22.8938	4.81541	7.45426	3.23144	0.280231	0
srna2346464	CCCGCCGGGGTCGGC	15	1	chr10	63422757	63422771	-	EXACT	refGene	NM_173554	C10orf107	63422718	63526091	+	Homo sapiens chromosome 10 open reading frame 107 (C10orf107), mRNA.	6	7	5	3	3	4	2	2	4	5	10	3.30579	2.20832	2.28311	2.85776	1.83335	2.49766	5.90354	5.7813	3.0532	3.73218	3.92465	1.60514	4.47897	1.79327	0.0222491	0
srna2426329	CCGCCGGGGTCGGCCC	16	1	chr10	63422755	63422770	-	EXACT	refGene	NM_173554	C10orf107	63422718	63526091	+	Homo sapiens chromosome 10 open reading frame 107 (C10orf107), mRNA.	1	2	3	1	1	1	5	1	3	4	19	1.98347	0.736106	0.761035	0.714439	4.58337	1.75568	11.2167	1.6518	2.2899	2.98574	0.654108	0.802568	3.75965	2.14142	0.370385	0
srna6063358	TTGGGGAAACGGCCGCTGAGTGA	23	1	chr10	115933909	115933931	-	EXACT	refGene	NM_018017	C10orf118	115881973	115934364	-	Homo sapiens chromosome 10 open reading frame 118 (C10orf118), mRNA.	22	17	36	21	65	36	31	13	21	10	20	23.8017	47.8469	15.9817	25.7198	28.4169	28.3534	11.8071	14.0403	16.0293	7.46436	14.3904	10.4334	12.7463	0.449551	0.0397075	0
srna6063355	TTGGGGAAACGGCCGCTGAGT	21	1	chr10	115933911	115933931	-	EXACT	refGene	NM_018017	C10orf118	115881973	115934364	-	Homo sapiens chromosome 10 open reading frame 118 (C10orf118), mRNA.	26	20	32	32	55	36	23	33	34	13	19	21.157	40.4858	24.3531	25.7198	21.0835	26.5599	11.2167	16.518	25.9522	9.70366	17.0068	26.4848	16.0795	0.605405	0.0534798	0
srna6063357	TTGGGGAAACGGCCGCTGAGTG	22	1	chr10	115933910	115933931	-	EXACT	refGene	NM_018017	C10orf118	115881973	115934364	-	Homo sapiens chromosome 10 open reading frame 118 (C10orf118), mRNA.	13	6	7	10	20	15	15	6	9	3	5	4.6281	14.7221	7.61035	10.7166	13.7501	10.2855	2.95177	4.9554	6.8697	2.23931	8.5034	4.81541	5.10392	0.496227	0.0539346	0
srna6063364	TTGGGGAAACGGCCGCTGAGTGAG	24	1	chr10	115933908	115933931	-	EXACT	refGene	NM_018017	C10orf118	115881973	115934364	-	Homo sapiens chromosome 10 open reading frame 118 (C10orf118), mRNA.	10	2	9	7	16	10	10	9	7	9	3	5.95041	11.7777	5.32725	7.14439	9.16674	7.8733	1.77106	1.6518	5.3431	6.71792	6.54108	7.22311	4.40499	0.559485	0.0656746	0
srna6063370	TTGGGGAAACGGCCGCTGAGTGAGT	25	1	chr10	115933908	115933931	-	CLIPPED	refGene	NM_018017	C10orf118	115881973	115934364	-	Homo sapiens chromosome 10 open reading frame 118 (C10orf118), mRNA.	2	1	7	5	14	4	8	2	5	8	4	4.6281	10.3055	3.80518	2.85776	7.33339	5.78598	2.36141	0.8259	3.8165	5.97149	1.30822	1.60514	2.8567	0.493728	0.117381	0
srna6063365	TTGGGGAAACGGCCGCTGAGTGAGA	25	1	chr10	115933908	115933931	-	CLIPPED	refGene	NM_018017	C10orf118	115881973	115934364	-	Homo sapiens chromosome 10 open reading frame 118 (C10orf118), mRNA.	1	1	2	3	10	1	3	2	1	1	2	1.32231	7.36106	2.28311	0.714439	2.75002	2.88619	1.18071	0.8259	0.763301	0.746436	0.654108	1.60514	0.83409	0.288994	0.155507	0
srna4119877	GGCGGCGGCCGCCGCGGG	18	1	chr10	21805796	21805813	-	EXACT	refGene	NM_207371	C10orf140	21802408	21814611	-	Homo sapiens chromosome 10 open reading frame 140 (C10orf140), mRNA.		3	1	1			10	1		2		0.661157	0	0.761035	0	9.16674	2.11779	0	2.4777	0	1.49287	0	0.802568	0.794114	0.374974	0.5067	0
srna709847	ACCCTCCTTTTCTTGGCGGGGATCGGGCT	29	1	chr11	62432892	62432920	+	EXACT	refGene	NM_024099	C11orf48	62430288	62439241	-	Homo sapiens chromosome 11 open reading frame 48 (C11orf48), mRNA.	2	14	6	3	2	5	3	7	2	5	36	3.96694	1.47221	2.28311	3.57219	2.75002	2.8089	21.2527	11.5626	1.5266	3.73218	1.30822	5.61798	7.87647	2.80412	0.257184	0
srna709843	ACCCTCCTTTTCTTGGCGGGGATCGG	26	1	chr11	62432892	62432917	+	EXACT	refGene	NM_024099	C11orf48	62430288	62439241	-	Homo sapiens chromosome 11 open reading frame 48 (C11orf48), mRNA.		14	4	2		1	4	6	5		2	2.64463	0	1.52207	0.714439	3.6667	1.70957	1.18071	11.5626	3.8165	0	0	4.81541	3.31196	1.93731	0.514305	0
srna709857	ACCCTCCTTTTCTTGGCGGGGATCGGGCTTGTGGTGCCG	39	1	chr11	62432892	62432930	+	EXACT	refGene	NM_024099	C11orf48	62430288	62439241	-	Homo sapiens chromosome 11 open reading frame 48 (C11orf48), mRNA.	2	12	4	2	1			2	5	3		2.64463	0.736106	1.52207	0	0	0.980561	0	9.9108	3.8165	2.23931	1.30822	1.60514	3.45497	3.52346	0.23176	0
srna709845	ACCCTCCTTTTCTTGGCGGGGATCGGGC	28	1	chr11	62432892	62432919	+	EXACT	refGene	NM_024099	C11orf48	62430288	62439241	-	Homo sapiens chromosome 11 open reading frame 48 (C11orf48), mRNA.		4	1		2		1	1	1	6	11	0.661157	1.47221	0	0	0.916674	0.610009	6.49389	3.3036	0.763301	4.47861	0	0.802568	3.00788	4.93088	0.115082	0
srna6249305	TTTTTCTTGCTGCGAAGAAGATTCC	25	1	chr14	91666208	91666232	+	EXACT	refGene	NM_001102366	C14orf159	91580356	91691703	+	Homo sapiens chromosome 14 open reading frame 159 (C14orf159), transcript variant 1, mRNA.		12	5	10	12	6	9	5	6	2	1	3.30579	8.83327	7.61035	4.28663	8.25007	6.45722	0.590354	9.9108	4.5798	1.49287	0	4.01284	3.31477	0.513342	0.188051	0
srna6249305	TTTTTCTTGCTGCGAAGAAGATTCC	25	1	chr14	91666208	91666232	+	EXACT	refGene	NM_001102367	C14orf159	91580978	91691703	+	Homo sapiens chromosome 14 open reading frame 159 (C14orf159), transcript variant 2, mRNA.		12	5	10	12	6	9	5	6	2	1	3.30579	8.83327	7.61035	4.28663	8.25007	6.45722	0.590354	9.9108	4.5798	1.49287	0	4.01284	3.31477	0.513342	0.188051	0
srna6249305	TTTTTCTTGCTGCGAAGAAGATTCC	25	1	chr14	91666208	91666232	+	EXACT	refGene	NM_001102368	C14orf159	91580356	91691703	+	Homo sapiens chromosome 14 open reading frame 159 (C14orf159), transcript variant 4, mRNA.		12	5	10	12	6	9	5	6	2	1	3.30579	8.83327	7.61035	4.28663	8.25007	6.45722	0.590354	9.9108	4.5798	1.49287	0	4.01284	3.31477	0.513342	0.188051	0
srna6249305	TTTTTCTTGCTGCGAAGAAGATTCC	25	1	chr14	91666208	91666232	+	EXACT	refGene	NM_001102369	C14orf159	91580356	91691703	+	Homo sapiens chromosome 14 open reading frame 159 (C14orf159), transcript variant 5, mRNA.		12	5	10	12	6	9	5	6	2	1	3.30579	8.83327	7.61035	4.28663	8.25007	6.45722	0.590354	9.9108	4.5798	1.49287	0	4.01284	3.31477	0.513342	0.188051	0
srna6249305	TTTTTCTTGCTGCGAAGAAGATTCC	25	1	chr14	91666208	91666232	+	EXACT	refGene	NM_024952	C14orf159	91580356	91691703	+	Homo sapiens chromosome 14 open reading frame 159 (C14orf159), transcript variant 3, mRNA.		12	5	10	12	6	9	5	6	2	1	3.30579	8.83327	7.61035	4.28663	8.25007	6.45722	0.590354	9.9108	4.5798	1.49287	0	4.01284	3.31477	0.513342	0.188051	0
srna5516362	TGCTCTGATGAAATCACT	18	1	chr17	16343350	16343367	+	EXACT	refGene	NR_027158	C17orf76-AS1	16342300	16345340	+	Homo sapiens C17orf76 antisense RNA 1 (non-protein coding) (C17orf76-AS1), transcript variant 2, non-coding RNA.	67	503	497	226	62	152	324	624	280	154	476	328.595	45.6386	171.994	108.595	297.002	190.365	281.008	415.428	213.724	114.951	43.8252	500.803	213.787	1.12304	0.788506	1
srna5516362	TGCTCTGATGAAATCACT	18	1	chr17	16343350	16343367	+	EXACT	refGene	NR_027163	C17orf76-AS1	16342300	16345340	+	Homo sapiens C17orf76 antisense RNA 1 (non-protein coding) (C17orf76-AS1), transcript variant 7, non-coding RNA.	67	503	497	226	62	152	324	624	280	154	476	328.595	45.6386	171.994	108.595	297.002	190.365	281.008	415.428	213.724	114.951	43.8252	500.803	213.787	1.12304	0.788506	1
srna5516362	TGCTCTGATGAAATCACT	18	1	chr17	16343350	16343367	+	EXACT	refGene	NR_027164	C17orf76-AS1	16342300	16345340	+	Homo sapiens C17orf76 antisense RNA 1 (non-protein coding) (C17orf76-AS1), transcript variant 8, non-coding RNA.	67	503	497	226	62	152	324	624	280	154	476	328.595	45.6386	171.994	108.595	297.002	190.365	281.008	415.428	213.724	114.951	43.8252	500.803	213.787	1.12304	0.788506	1
srna5516362	TGCTCTGATGAAATCACT	18	1	chr17	16343350	16343367	+	EXACT	refGene	NR_027165	C17orf76-AS1	16342300	16345340	+	Homo sapiens C17orf76 antisense RNA 1 (non-protein coding) (C17orf76-AS1), transcript variant 9, non-coding RNA.	67	503	497	226	62	152	324	624	280	154	476	328.595	45.6386	171.994	108.595	297.002	190.365	281.008	415.428	213.724	114.951	43.8252	500.803	213.787	1.12304	0.788506	1
srna5516362	TGCTCTGATGAAATCACT	18	1	chr17	16343350	16343367	+	EXACT	refGene	NR_027166	C17orf76-AS1	16342300	16345340	+	Homo sapiens C17orf76 antisense RNA 1 (non-protein coding) (C17orf76-AS1), transcript variant 10, non-coding RNA.	67	503	497	226	62	152	324	624	280	154	476	328.595	45.6386	171.994	108.595	297.002	190.365	281.008	415.428	213.724	114.951	43.8252	500.803	213.787	1.12304	0.788506	1
srna5516362	TGCTCTGATGAAATCACT	18	1	chr17	16343350	16343367	+	EXACT	refGene	NR_027167	C17orf76-AS1	16342300	16345340	+	Homo sapiens C17orf76 antisense RNA 1 (non-protein coding) (C17orf76-AS1), transcript variant 11, non-coding RNA.	67	503	497	226	62	152	324	624	280	154	476	328.595	45.6386	171.994	108.595	297.002	190.365	281.008	415.428	213.724	114.951	43.8252	500.803	213.787	1.12304	0.788506	1
srna5516362	TGCTCTGATGAAATCACT	18	1	chr17	16343350	16343367	+	EXACT	refGene	NR_027168	C17orf76-AS1	16342300	16345340	+	Homo sapiens C17orf76 antisense RNA 1 (non-protein coding) (C17orf76-AS1), transcript variant 12, non-coding RNA.	67	503	497	226	62	152	324	624	280	154	476	328.595	45.6386	171.994	108.595	297.002	190.365	281.008	415.428	213.724	114.951	43.8252	500.803	213.787	1.12304	0.788506	1
srna5516362	TGCTCTGATGAAATCACT	18	1	chr17	16343350	16343367	+	EXACT	refGene	NR_027169	C17orf76-AS1	16342300	16345340	+	Homo sapiens C17orf76 antisense RNA 1 (non-protein coding) (C17orf76-AS1), transcript variant 13, non-coding RNA.	67	503	497	226	62	152	324	624	280	154	476	328.595	45.6386	171.994	108.595	297.002	190.365	281.008	415.428	213.724	114.951	43.8252	500.803	213.787	1.12304	0.788506	1
srna5516362	TGCTCTGATGAAATCACT	18	1	chr17	16343350	16343367	+	EXACT	refGene	NR_027170	C17orf76-AS1	16342300	16345340	+	Homo sapiens C17orf76 antisense RNA 1 (non-protein coding) (C17orf76-AS1), transcript variant 14, non-coding RNA.	67	503	497	226	62	152	324	624	280	154	476	328.595	45.6386	171.994	108.595	297.002	190.365	281.008	415.428	213.724	114.951	43.8252	500.803	213.787	1.12304	0.788506	1
srna5516362	TGCTCTGATGAAATCACT	18	1	chr17	16343350	16343367	+	EXACT	refGene	NR_027172	C17orf76-AS1	16342300	16373962	+	Homo sapiens C17orf76 antisense RNA 1 (non-protein coding) (C17orf76-AS1), transcript variant 16, non-coding RNA.	67	503	497	226	62	152	324	624	280	154	476	328.595	45.6386	171.994	108.595	297.002	190.365	281.008	415.428	213.724	114.951	43.8252	500.803	213.787	1.12304	0.788506	1
srna5516362	TGCTCTGATGAAATCACT	18	1	chr17	16343350	16343367	+	EXACT	refGene	NR_027173	C17orf76-AS1	16342300	16373962	+	Homo sapiens C17orf76 antisense RNA 1 (non-protein coding) (C17orf76-AS1), transcript variant 17, non-coding RNA.	67	503	497	226	62	152	324	624	280	154	476	328.595	45.6386	171.994	108.595	297.002	190.365	281.008	415.428	213.724	114.951	43.8252	500.803	213.787	1.12304	0.788506	1
srna5516362	TGCTCTGATGAAATCACT	18	1	chr17	16343350	16343367	+	EXACT	refGene	NR_027174	C17orf76-AS1	16342300	16373962	+	Homo sapiens C17orf76 antisense RNA 1 (non-protein coding) (C17orf76-AS1), transcript variant 18, non-coding RNA.	67	503	497	226	62	152	324	624	280	154	476	328.595	45.6386	171.994	108.595	297.002	190.365	281.008	415.428	213.724	114.951	43.8252	500.803	213.787	1.12304	0.788506	1
srna5516362	TGCTCTGATGAAATCACT	18	1	chr17	16343350	16343367	+	EXACT	refGene	NR_027175	C17orf76-AS1	16342300	16373962	+	Homo sapiens C17orf76 antisense RNA 1 (non-protein coding) (C17orf76-AS1), transcript variant 19, non-coding RNA.	67	503	497	226	62	152	324	624	280	154	476	328.595	45.6386	171.994	108.595	297.002	190.365	281.008	415.428	213.724	114.951	43.8252	500.803	213.787	1.12304	0.788506	1
srna5516362	TGCTCTGATGAAATCACT	18	1	chr17	16343350	16343367	+	EXACT	refGene	NR_027176	C17orf76-AS1	16342300	16373962	+	Homo sapiens C17orf76 antisense RNA 1 (non-protein coding) (C17orf76-AS1), transcript variant 20, non-coding RNA.	67	503	497	226	62	152	324	624	280	154	476	328.595	45.6386	171.994	108.595	297.002	190.365	281.008	415.428	213.724	114.951	43.8252	500.803	213.787	1.12304	0.788506	1
srna5516362	TGCTCTGATGAAATCACT	18	1	chr17	16343350	16343367	+	EXACT	refGene	NR_027177	C17orf76-AS1	16342300	16373962	+	Homo sapiens C17orf76 antisense RNA 1 (non-protein coding) (C17orf76-AS1), transcript variant 21, non-coding RNA.	67	503	497	226	62	152	324	624	280	154	476	328.595	45.6386	171.994	108.595	297.002	190.365	281.008	415.428	213.724	114.951	43.8252	500.803	213.787	1.12304	0.788506	1
srna5516362	TGCTCTGATGAAATCACT	18	1	chr17	16343350	16343367	+	EXACT	refGene	NR_027178	C17orf76-AS1	16342300	16373962	+	Homo sapiens C17orf76 antisense RNA 1 (non-protein coding) (C17orf76-AS1), transcript variant 22, non-coding RNA.	67	503	497	226	62	152	324	624	280	154	476	328.595	45.6386	171.994	108.595	297.002	190.365	281.008	415.428	213.724	114.951	43.8252	500.803	213.787	1.12304	0.788506	1
srna5516362	TGCTCTGATGAAATCACT	18	1	chr17	16343350	16343367	+	EXACT	refGene	NR_027179	C17orf76-AS1	16342300	16344525	+	Homo sapiens C17orf76 antisense RNA 1 (non-protein coding) (C17orf76-AS1), transcript variant 23, non-coding RNA.	67	503	497	226	62	152	324	624	280	154	476	328.595	45.6386	171.994	108.595	297.002	190.365	281.008	415.428	213.724	114.951	43.8252	500.803	213.787	1.12304	0.788506	1
srna5516362	TGCTCTGATGAAATCACT	18	1	chr17	16343350	16343367	+	EXACT	refGene	NR_027667	C17orf76-AS1	16342300	16345340	+	Homo sapiens C17orf76 antisense RNA 1 (non-protein coding) (C17orf76-AS1), transcript variant 1, non-coding RNA.	67	503	497	226	62	152	324	624	280	154	476	328.595	45.6386	171.994	108.595	297.002	190.365	281.008	415.428	213.724	114.951	43.8252	500.803	213.787	1.12304	0.788506	1
srna5516362	TGCTCTGATGAAATCACT	18	1	chr17	16343350	16343367	+	EXACT	refGene	NR_045021	C17orf76-AS1	16342300	16345340	+	Homo sapiens C17orf76 antisense RNA 1 (non-protein coding) (C17orf76-AS1), transcript variant 24, non-coding RNA.	67	503	497	226	62	152	324	624	280	154	476	328.595	45.6386	171.994	108.595	297.002	190.365	281.008	415.428	213.724	114.951	43.8252	500.803	213.787	1.12304	0.788506	1
srna5516362	TGCTCTGATGAAATCACT	18	1	chr17	16343350	16343367	+	EXACT	refGene	NR_045022	C17orf76-AS1	16342300	16345340	+	Homo sapiens C17orf76 antisense RNA 1 (non-protein coding) (C17orf76-AS1), transcript variant 25, non-coding RNA.	67	503	497	226	62	152	324	624	280	154	476	328.595	45.6386	171.994	108.595	297.002	190.365	281.008	415.428	213.724	114.951	43.8252	500.803	213.787	1.12304	0.788506	1
srna5516362	TGCTCTGATGAAATCACT	18	1	chr17	16343350	16343367	+	EXACT	refGene	NR_045023	C17orf76-AS1	16342300	16373962	+	Homo sapiens C17orf76 antisense RNA 1 (non-protein coding) (C17orf76-AS1), transcript variant 26, non-coding RNA.	67	503	497	226	62	152	324	624	280	154	476	328.595	45.6386	171.994	108.595	297.002	190.365	281.008	415.428	213.724	114.951	43.8252	500.803	213.787	1.12304	0.788506	1
srna5516362	TGCTCTGATGAAATCACT	18	1	chr17	16343350	16343367	+	EXACT	refGene	NR_045025	C17orf76-AS1	16342300	16373962	+	Homo sapiens C17orf76 antisense RNA 1 (non-protein coding) (C17orf76-AS1), transcript variant 28, non-coding RNA.	67	503	497	226	62	152	324	624	280	154	476	328.595	45.6386	171.994	108.595	297.002	190.365	281.008	415.428	213.724	114.951	43.8252	500.803	213.787	1.12304	0.788506	1
srna5516362	TGCTCTGATGAAATCACT	18	1	chr17	16343350	16343367	+	EXACT	refGene	NR_045026	C17orf76-AS1	16342300	16344525	+	Homo sapiens C17orf76 antisense RNA 1 (non-protein coding) (C17orf76-AS1), transcript variant 29, non-coding RNA.	67	503	497	226	62	152	324	624	280	154	476	328.595	45.6386	171.994	108.595	297.002	190.365	281.008	415.428	213.724	114.951	43.8252	500.803	213.787	1.12304	0.788506	1
srna5516362	TGCTCTGATGAAATCACT	18	1	chr17	16343350	16343367	+	EXACT	refGene	NR_045028	C17orf76-AS1	16342300	16345340	+	Homo sapiens C17orf76 antisense RNA 1 (non-protein coding) (C17orf76-AS1), transcript variant 31, non-coding RNA.	67	503	497	226	62	152	324	624	280	154	476	328.595	45.6386	171.994	108.595	297.002	190.365	281.008	415.428	213.724	114.951	43.8252	500.803	213.787	1.12304	0.788506	1
srna5516362	TGCTCTGATGAAATCACT	18	1	chr17	16343350	16343367	+	EXACT	refGene	NR_045029	C17orf76-AS1	16342300	16345340	+	Homo sapiens C17orf76 antisense RNA 1 (non-protein coding) (C17orf76-AS1), transcript variant 32, non-coding RNA.	67	503	497	226	62	152	324	624	280	154	476	328.595	45.6386	171.994	108.595	297.002	190.365	281.008	415.428	213.724	114.951	43.8252	500.803	213.787	1.12304	0.788506	1
srna4960936	TCAAATGATGAAATCACCCAAAATAGC	27	1	chr17	16344538	16344564	+	EXACT	refGene	NR_027158	C17orf76-AS1	16342300	16345340	+	Homo sapiens C17orf76 antisense RNA 1 (non-protein coding) (C17orf76-AS1), transcript variant 2, non-coding RNA.	134	775	138	379	109	260	60	221	338	99	67	91.2397	80.2356	288.432	185.754	55.0005	140.132	39.5537	640.073	257.996	73.8971	87.6504	177.368	219.834	1.56876	0.534108	1
srna4960936	TCAAATGATGAAATCACCCAAAATAGC	27	1	chr17	16344538	16344564	+	EXACT	refGene	NR_027163	C17orf76-AS1	16342300	16345340	+	Homo sapiens C17orf76 antisense RNA 1 (non-protein coding) (C17orf76-AS1), transcript variant 7, non-coding RNA.	134	775	138	379	109	260	60	221	338	99	67	91.2397	80.2356	288.432	185.754	55.0005	140.132	39.5537	640.073	257.996	73.8971	87.6504	177.368	219.834	1.56876	0.534108	1
srna4960936	TCAAATGATGAAATCACCCAAAATAGC	27	1	chr17	16344538	16344564	+	EXACT	refGene	NR_027164	C17orf76-AS1	16342300	16345340	+	Homo sapiens C17orf76 antisense RNA 1 (non-protein coding) (C17orf76-AS1), transcript variant 8, non-coding RNA.	134	775	138	379	109	260	60	221	338	99	67	91.2397	80.2356	288.432	185.754	55.0005	140.132	39.5537	640.073	257.996	73.8971	87.6504	177.368	219.834	1.56876	0.534108	1
srna4960936	TCAAATGATGAAATCACCCAAAATAGC	27	1	chr17	16344538	16344564	+	EXACT	refGene	NR_027165	C17orf76-AS1	16342300	16345340	+	Homo sapiens C17orf76 antisense RNA 1 (non-protein coding) (C17orf76-AS1), transcript variant 9, non-coding RNA.	134	775	138	379	109	260	60	221	338	99	67	91.2397	80.2356	288.432	185.754	55.0005	140.132	39.5537	640.073	257.996	73.8971	87.6504	177.368	219.834	1.56876	0.534108	1
srna4960936	TCAAATGATGAAATCACCCAAAATAGC	27	1	chr17	16344538	16344564	+	EXACT	refGene	NR_027166	C17orf76-AS1	16342300	16345340	+	Homo sapiens C17orf76 antisense RNA 1 (non-protein coding) (C17orf76-AS1), transcript variant 10, non-coding RNA.	134	775	138	379	109	260	60	221	338	99	67	91.2397	80.2356	288.432	185.754	55.0005	140.132	39.5537	640.073	257.996	73.8971	87.6504	177.368	219.834	1.56876	0.534108	1
srna4960936	TCAAATGATGAAATCACCCAAAATAGC	27	1	chr17	16344538	16344564	+	EXACT	refGene	NR_027167	C17orf76-AS1	16342300	16345340	+	Homo sapiens C17orf76 antisense RNA 1 (non-protein coding) (C17orf76-AS1), transcript variant 11, non-coding RNA.	134	775	138	379	109	260	60	221	338	99	67	91.2397	80.2356	288.432	185.754	55.0005	140.132	39.5537	640.073	257.996	73.8971	87.6504	177.368	219.834	1.56876	0.534108	1
srna4960936	TCAAATGATGAAATCACCCAAAATAGC	27	1	chr17	16344538	16344564	+	EXACT	refGene	NR_027168	C17orf76-AS1	16342300	16345340	+	Homo sapiens C17orf76 antisense RNA 1 (non-protein coding) (C17orf76-AS1), transcript variant 12, non-coding RNA.	134	775	138	379	109	260	60	221	338	99	67	91.2397	80.2356	288.432	185.754	55.0005	140.132	39.5537	640.073	257.996	73.8971	87.6504	177.368	219.834	1.56876	0.534108	1
srna4960936	TCAAATGATGAAATCACCCAAAATAGC	27	1	chr17	16344538	16344564	+	EXACT	refGene	NR_027169	C17orf76-AS1	16342300	16345340	+	Homo sapiens C17orf76 antisense RNA 1 (non-protein coding) (C17orf76-AS1), transcript variant 13, non-coding RNA.	134	775	138	379	109	260	60	221	338	99	67	91.2397	80.2356	288.432	185.754	55.0005	140.132	39.5537	640.073	257.996	73.8971	87.6504	177.368	219.834	1.56876	0.534108	1
srna4960936	TCAAATGATGAAATCACCCAAAATAGC	27	1	chr17	16344538	16344564	+	EXACT	refGene	NR_027170	C17orf76-AS1	16342300	16345340	+	Homo sapiens C17orf76 antisense RNA 1 (non-protein coding) (C17orf76-AS1), transcript variant 14, non-coding RNA.	134	775	138	379	109	260	60	221	338	99	67	91.2397	80.2356	288.432	185.754	55.0005	140.132	39.5537	640.073	257.996	73.8971	87.6504	177.368	219.834	1.56876	0.534108	1
srna4960936	TCAAATGATGAAATCACCCAAAATAGC	27	1	chr17	16344538	16344564	+	EXACT	refGene	NR_027172	C17orf76-AS1	16342300	16373962	+	Homo sapiens C17orf76 antisense RNA 1 (non-protein coding) (C17orf76-AS1), transcript variant 16, non-coding RNA.	134	775	138	379	109	260	60	221	338	99	67	91.2397	80.2356	288.432	185.754	55.0005	140.132	39.5537	640.073	257.996	73.8971	87.6504	177.368	219.834	1.56876	0.534108	1
srna4960936	TCAAATGATGAAATCACCCAAAATAGC	27	1	chr17	16344538	16344564	+	EXACT	refGene	NR_027173	C17orf76-AS1	16342300	16373962	+	Homo sapiens C17orf76 antisense RNA 1 (non-protein coding) (C17orf76-AS1), transcript variant 17, non-coding RNA.	134	775	138	379	109	260	60	221	338	99	67	91.2397	80.2356	288.432	185.754	55.0005	140.132	39.5537	640.073	257.996	73.8971	87.6504	177.368	219.834	1.56876	0.534108	1
srna4960936	TCAAATGATGAAATCACCCAAAATAGC	27	1	chr17	16344538	16344564	+	EXACT	refGene	NR_027174	C17orf76-AS1	16342300	16373962	+	Homo sapiens C17orf76 antisense RNA 1 (non-protein coding) (C17orf76-AS1), transcript variant 18, non-coding RNA.	134	775	138	379	109	260	60	221	338	99	67	91.2397	80.2356	288.432	185.754	55.0005	140.132	39.5537	640.073	257.996	73.8971	87.6504	177.368	219.834	1.56876	0.534108	1
srna4960936	TCAAATGATGAAATCACCCAAAATAGC	27	1	chr17	16344538	16344564	+	EXACT	refGene	NR_027175	C17orf76-AS1	16342300	16373962	+	Homo sapiens C17orf76 antisense RNA 1 (non-protein coding) (C17orf76-AS1), transcript variant 19, non-coding RNA.	134	775	138	379	109	260	60	221	338	99	67	91.2397	80.2356	288.432	185.754	55.0005	140.132	39.5537	640.073	257.996	73.8971	87.6504	177.368	219.834	1.56876	0.534108	1
srna4960936	TCAAATGATGAAATCACCCAAAATAGC	27	1	chr17	16344538	16344564	+	EXACT	refGene	NR_027176	C17orf76-AS1	16342300	16373962	+	Homo sapiens C17orf76 antisense RNA 1 (non-protein coding) (C17orf76-AS1), transcript variant 20, non-coding RNA.	134	775	138	379	109	260	60	221	338	99	67	91.2397	80.2356	288.432	185.754	55.0005	140.132	39.5537	640.073	257.996	73.8971	87.6504	177.368	219.834	1.56876	0.534108	1
srna4960936	TCAAATGATGAAATCACCCAAAATAGC	27	1	chr17	16344538	16344564	+	EXACT	refGene	NR_027177	C17orf76-AS1	16342300	16373962	+	Homo sapiens C17orf76 antisense RNA 1 (non-protein coding) (C17orf76-AS1), transcript variant 21, non-coding RNA.	134	775	138	379	109	260	60	221	338	99	67	91.2397	80.2356	288.432	185.754	55.0005	140.132	39.5537	640.073	257.996	73.8971	87.6504	177.368	219.834	1.56876	0.534108	1
srna4960936	TCAAATGATGAAATCACCCAAAATAGC	27	1	chr17	16344538	16344564	+	EXACT	refGene	NR_027178	C17orf76-AS1	16342300	16373962	+	Homo sapiens C17orf76 antisense RNA 1 (non-protein coding) (C17orf76-AS1), transcript variant 22, non-coding RNA.	134	775	138	379	109	260	60	221	338	99	67	91.2397	80.2356	288.432	185.754	55.0005	140.132	39.5537	640.073	257.996	73.8971	87.6504	177.368	219.834	1.56876	0.534108	1
srna4960936	TCAAATGATGAAATCACCCAAAATAGC	27	1	chr17	16344538	16344564	+	EXACT	refGene	NR_027667	C17orf76-AS1	16342300	16345340	+	Homo sapiens C17orf76 antisense RNA 1 (non-protein coding) (C17orf76-AS1), transcript variant 1, non-coding RNA.	134	775	138	379	109	260	60	221	338	99	67	91.2397	80.2356	288.432	185.754	55.0005	140.132	39.5537	640.073	257.996	73.8971	87.6504	177.368	219.834	1.56876	0.534108	1
srna4960936	TCAAATGATGAAATCACCCAAAATAGC	27	1	chr17	16344538	16344564	+	EXACT	refGene	NR_045021	C17orf76-AS1	16342300	16345340	+	Homo sapiens C17orf76 antisense RNA 1 (non-protein coding) (C17orf76-AS1), transcript variant 24, non-coding RNA.	134	775	138	379	109	260	60	221	338	99	67	91.2397	80.2356	288.432	185.754	55.0005	140.132	39.5537	640.073	257.996	73.8971	87.6504	177.368	219.834	1.56876	0.534108	1
srna4960936	TCAAATGATGAAATCACCCAAAATAGC	27	1	chr17	16344538	16344564	+	EXACT	refGene	NR_045022	C17orf76-AS1	16342300	16345340	+	Homo sapiens C17orf76 antisense RNA 1 (non-protein coding) (C17orf76-AS1), transcript variant 25, non-coding RNA.	134	775	138	379	109	260	60	221	338	99	67	91.2397	80.2356	288.432	185.754	55.0005	140.132	39.5537	640.073	257.996	73.8971	87.6504	177.368	219.834	1.56876	0.534108	1
srna4960936	TCAAATGATGAAATCACCCAAAATAGC	27	1	chr17	16344538	16344564	+	EXACT	refGene	NR_045023	C17orf76-AS1	16342300	16373962	+	Homo sapiens C17orf76 antisense RNA 1 (non-protein coding) (C17orf76-AS1), transcript variant 26, non-coding RNA.	134	775	138	379	109	260	60	221	338	99	67	91.2397	80.2356	288.432	185.754	55.0005	140.132	39.5537	640.073	257.996	73.8971	87.6504	177.368	219.834	1.56876	0.534108	1
srna4960936	TCAAATGATGAAATCACCCAAAATAGC	27	1	chr17	16344538	16344564	+	EXACT	refGene	NR_045025	C17orf76-AS1	16342300	16373962	+	Homo sapiens C17orf76 antisense RNA 1 (non-protein coding) (C17orf76-AS1), transcript variant 28, non-coding RNA.	134	775	138	379	109	260	60	221	338	99	67	91.2397	80.2356	288.432	185.754	55.0005	140.132	39.5537	640.073	257.996	73.8971	87.6504	177.368	219.834	1.56876	0.534108	1
srna4960936	TCAAATGATGAAATCACCCAAAATAGC	27	1	chr17	16344538	16344564	+	EXACT	refGene	NR_045028	C17orf76-AS1	16342300	16345340	+	Homo sapiens C17orf76 antisense RNA 1 (non-protein coding) (C17orf76-AS1), transcript variant 31, non-coding RNA.	134	775	138	379	109	260	60	221	338	99	67	91.2397	80.2356	288.432	185.754	55.0005	140.132	39.5537	640.073	257.996	73.8971	87.6504	177.368	219.834	1.56876	0.534108	1
srna4960936	TCAAATGATGAAATCACCCAAAATAGC	27	1	chr17	16344538	16344564	+	EXACT	refGene	NR_045029	C17orf76-AS1	16342300	16345340	+	Homo sapiens C17orf76 antisense RNA 1 (non-protein coding) (C17orf76-AS1), transcript variant 32, non-coding RNA.	134	775	138	379	109	260	60	221	338	99	67	91.2397	80.2356	288.432	185.754	55.0005	140.132	39.5537	640.073	257.996	73.8971	87.6504	177.368	219.834	1.56876	0.534108	1
srna5516415	TGCTCTGATGAAATCACTAATAGGAAGTGCCGTCAGAAG	39	1	chr17	16343350	16343388	+	EXACT	refGene	NR_027158	C17orf76-AS1	16342300	16345340	+	Homo sapiens C17orf76 antisense RNA 1 (non-protein coding) (C17orf76-AS1), transcript variant 2, non-coding RNA.	250	502	272	218	25	144	144	139	144	172	113	179.835	18.4026	165.906	102.879	132.001	119.805	66.71	414.602	109.915	128.387	163.527	111.557	176.628	1.4743	0.43633	1
srna5516415	TGCTCTGATGAAATCACTAATAGGAAGTGCCGTCAGAAG	39	1	chr17	16343350	16343388	+	EXACT	refGene	NR_027163	C17orf76-AS1	16342300	16345340	+	Homo sapiens C17orf76 antisense RNA 1 (non-protein coding) (C17orf76-AS1), transcript variant 7, non-coding RNA.	250	502	272	218	25	144	144	139	144	172	113	179.835	18.4026	165.906	102.879	132.001	119.805	66.71	414.602	109.915	128.387	163.527	111.557	176.628	1.4743	0.43633	1
srna5516415	TGCTCTGATGAAATCACTAATAGGAAGTGCCGTCAGAAG	39	1	chr17	16343350	16343388	+	EXACT	refGene	NR_027164	C17orf76-AS1	16342300	16345340	+	Homo sapiens C17orf76 antisense RNA 1 (non-protein coding) (C17orf76-AS1), transcript variant 8, non-coding RNA.	250	502	272	218	25	144	144	139	144	172	113	179.835	18.4026	165.906	102.879	132.001	119.805	66.71	414.602	109.915	128.387	163.527	111.557	176.628	1.4743	0.43633	1
srna5516415	TGCTCTGATGAAATCACTAATAGGAAGTGCCGTCAGAAG	39	1	chr17	16343350	16343388	+	EXACT	refGene	NR_027165	C17orf76-AS1	16342300	16345340	+	Homo sapiens C17orf76 antisense RNA 1 (non-protein coding) (C17orf76-AS1), transcript variant 9, non-coding RNA.	250	502	272	218	25	144	144	139	144	172	113	179.835	18.4026	165.906	102.879	132.001	119.805	66.71	414.602	109.915	128.387	163.527	111.557	176.628	1.4743	0.43633	1
srna5516415	TGCTCTGATGAAATCACTAATAGGAAGTGCCGTCAGAAG	39	1	chr17	16343350	16343388	+	EXACT	refGene	NR_027166	C17orf76-AS1	16342300	16345340	+	Homo sapiens C17orf76 antisense RNA 1 (non-protein coding) (C17orf76-AS1), transcript variant 10, non-coding RNA.	250	502	272	218	25	144	144	139	144	172	113	179.835	18.4026	165.906	102.879	132.001	119.805	66.71	414.602	109.915	128.387	163.527	111.557	176.628	1.4743	0.43633	1
srna5516415	TGCTCTGATGAAATCACTAATAGGAAGTGCCGTCAGAAG	39	1	chr17	16343350	16343388	+	EXACT	refGene	NR_027167	C17orf76-AS1	16342300	16345340	+	Homo sapiens C17orf76 antisense RNA 1 (non-protein coding) (C17orf76-AS1), transcript variant 11, non-coding RNA.	250	502	272	218	25	144	144	139	144	172	113	179.835	18.4026	165.906	102.879	132.001	119.805	66.71	414.602	109.915	128.387	163.527	111.557	176.628	1.4743	0.43633	1
srna5516415	TGCTCTGATGAAATCACTAATAGGAAGTGCCGTCAGAAG	39	1	chr17	16343350	16343388	+	EXACT	refGene	NR_027168	C17orf76-AS1	16342300	16345340	+	Homo sapiens C17orf76 antisense RNA 1 (non-protein coding) (C17orf76-AS1), transcript variant 12, non-coding RNA.	250	502	272	218	25	144	144	139	144	172	113	179.835	18.4026	165.906	102.879	132.001	119.805	66.71	414.602	109.915	128.387	163.527	111.557	176.628	1.4743	0.43633	1
srna5516415	TGCTCTGATGAAATCACTAATAGGAAGTGCCGTCAGAAG	39	1	chr17	16343350	16343388	+	EXACT	refGene	NR_027169	C17orf76-AS1	16342300	16345340	+	Homo sapiens C17orf76 antisense RNA 1 (non-protein coding) (C17orf76-AS1), transcript variant 13, non-coding RNA.	250	502	272	218	25	144	144	139	144	172	113	179.835	18.4026	165.906	102.879	132.001	119.805	66.71	414.602	109.915	128.387	163.527	111.557	176.628	1.4743	0.43633	1
srna5516415	TGCTCTGATGAAATCACTAATAGGAAGTGCCGTCAGAAG	39	1	chr17	16343350	16343388	+	EXACT	refGene	NR_027170	C17orf76-AS1	16342300	16345340	+	Homo sapiens C17orf76 antisense RNA 1 (non-protein coding) (C17orf76-AS1), transcript variant 14, non-coding RNA.	250	502	272	218	25	144	144	139	144	172	113	179.835	18.4026	165.906	102.879	132.001	119.805	66.71	414.602	109.915	128.387	163.527	111.557	176.628	1.4743	0.43633	1
srna5516415	TGCTCTGATGAAATCACTAATAGGAAGTGCCGTCAGAAG	39	1	chr17	16343350	16343388	+	EXACT	refGene	NR_027172	C17orf76-AS1	16342300	16373962	+	Homo sapiens C17orf76 antisense RNA 1 (non-protein coding) (C17orf76-AS1), transcript variant 16, non-coding RNA.	250	502	272	218	25	144	144	139	144	172	113	179.835	18.4026	165.906	102.879	132.001	119.805	66.71	414.602	109.915	128.387	163.527	111.557	176.628	1.4743	0.43633	1
srna5516415	TGCTCTGATGAAATCACTAATAGGAAGTGCCGTCAGAAG	39	1	chr17	16343350	16343388	+	EXACT	refGene	NR_027173	C17orf76-AS1	16342300	16373962	+	Homo sapiens C17orf76 antisense RNA 1 (non-protein coding) (C17orf76-AS1), transcript variant 17, non-coding RNA.	250	502	272	218	25	144	144	139	144	172	113	179.835	18.4026	165.906	102.879	132.001	119.805	66.71	414.602	109.915	128.387	163.527	111.557	176.628	1.4743	0.43633	1
srna5516415	TGCTCTGATGAAATCACTAATAGGAAGTGCCGTCAGAAG	39	1	chr17	16343350	16343388	+	EXACT	refGene	NR_027174	C17orf76-AS1	16342300	16373962	+	Homo sapiens C17orf76 antisense RNA 1 (non-protein coding) (C17orf76-AS1), transcript variant 18, non-coding RNA.	250	502	272	218	25	144	144	139	144	172	113	179.835	18.4026	165.906	102.879	132.001	119.805	66.71	414.602	109.915	128.387	163.527	111.557	176.628	1.4743	0.43633	1
srna5516415	TGCTCTGATGAAATCACTAATAGGAAGTGCCGTCAGAAG	39	1	chr17	16343350	16343388	+	EXACT	refGene	NR_027175	C17orf76-AS1	16342300	16373962	+	Homo sapiens C17orf76 antisense RNA 1 (non-protein coding) (C17orf76-AS1), transcript variant 19, non-coding RNA.	250	502	272	218	25	144	144	139	144	172	113	179.835	18.4026	165.906	102.879	132.001	119.805	66.71	414.602	109.915	128.387	163.527	111.557	176.628	1.4743	0.43633	1
srna5516415	TGCTCTGATGAAATCACTAATAGGAAGTGCCGTCAGAAG	39	1	chr17	16343350	16343388	+	EXACT	refGene	NR_027176	C17orf76-AS1	16342300	16373962	+	Homo sapiens C17orf76 antisense RNA 1 (non-protein coding) (C17orf76-AS1), transcript variant 20, non-coding RNA.	250	502	272	218	25	144	144	139	144	172	113	179.835	18.4026	165.906	102.879	132.001	119.805	66.71	414.602	109.915	128.387	163.527	111.557	176.628	1.4743	0.43633	1
srna5516415	TGCTCTGATGAAATCACTAATAGGAAGTGCCGTCAGAAG	39	1	chr17	16343350	16343388	+	EXACT	refGene	NR_027177	C17orf76-AS1	16342300	16373962	+	Homo sapiens C17orf76 antisense RNA 1 (non-protein coding) (C17orf76-AS1), transcript variant 21, non-coding RNA.	250	502	272	218	25	144	144	139	144	172	113	179.835	18.4026	165.906	102.879	132.001	119.805	66.71	414.602	109.915	128.387	163.527	111.557	176.628	1.4743	0.43633	1
srna5516415	TGCTCTGATGAAATCACTAATAGGAAGTGCCGTCAGAAG	39	1	chr17	16343350	16343388	+	EXACT	refGene	NR_027178	C17orf76-AS1	16342300	16373962	+	Homo sapiens C17orf76 antisense RNA 1 (non-protein coding) (C17orf76-AS1), transcript variant 22, non-coding RNA.	250	502	272	218	25	144	144	139	144	172	113	179.835	18.4026	165.906	102.879	132.001	119.805	66.71	414.602	109.915	128.387	163.527	111.557	176.628	1.4743	0.43633	1
srna5516415	TGCTCTGATGAAATCACTAATAGGAAGTGCCGTCAGAAG	39	1	chr17	16343350	16343388	+	EXACT	refGene	NR_027179	C17orf76-AS1	16342300	16344525	+	Homo sapiens C17orf76 antisense RNA 1 (non-protein coding) (C17orf76-AS1), transcript variant 23, non-coding RNA.	250	502	272	218	25	144	144	139	144	172	113	179.835	18.4026	165.906	102.879	132.001	119.805	66.71	414.602	109.915	128.387	163.527	111.557	176.628	1.4743	0.43633	1
srna5516415	TGCTCTGATGAAATCACTAATAGGAAGTGCCGTCAGAAG	39	1	chr17	16343350	16343388	+	EXACT	refGene	NR_027667	C17orf76-AS1	16342300	16345340	+	Homo sapiens C17orf76 antisense RNA 1 (non-protein coding) (C17orf76-AS1), transcript variant 1, non-coding RNA.	250	502	272	218	25	144	144	139	144	172	113	179.835	18.4026	165.906	102.879	132.001	119.805	66.71	414.602	109.915	128.387	163.527	111.557	176.628	1.4743	0.43633	1
srna5516415	TGCTCTGATGAAATCACTAATAGGAAGTGCCGTCAGAAG	39	1	chr17	16343350	16343388	+	EXACT	refGene	NR_045021	C17orf76-AS1	16342300	16345340	+	Homo sapiens C17orf76 antisense RNA 1 (non-protein coding) (C17orf76-AS1), transcript variant 24, non-coding RNA.	250	502	272	218	25	144	144	139	144	172	113	179.835	18.4026	165.906	102.879	132.001	119.805	66.71	414.602	109.915	128.387	163.527	111.557	176.628	1.4743	0.43633	1
srna5516415	TGCTCTGATGAAATCACTAATAGGAAGTGCCGTCAGAAG	39	1	chr17	16343350	16343388	+	EXACT	refGene	NR_045022	C17orf76-AS1	16342300	16345340	+	Homo sapiens C17orf76 antisense RNA 1 (non-protein coding) (C17orf76-AS1), transcript variant 25, non-coding RNA.	250	502	272	218	25	144	144	139	144	172	113	179.835	18.4026	165.906	102.879	132.001	119.805	66.71	414.602	109.915	128.387	163.527	111.557	176.628	1.4743	0.43633	1
srna5516415	TGCTCTGATGAAATCACTAATAGGAAGTGCCGTCAGAAG	39	1	chr17	16343350	16343388	+	EXACT	refGene	NR_045023	C17orf76-AS1	16342300	16373962	+	Homo sapiens C17orf76 antisense RNA 1 (non-protein coding) (C17orf76-AS1), transcript variant 26, non-coding RNA.	250	502	272	218	25	144	144	139	144	172	113	179.835	18.4026	165.906	102.879	132.001	119.805	66.71	414.602	109.915	128.387	163.527	111.557	176.628	1.4743	0.43633	1
srna5516415	TGCTCTGATGAAATCACTAATAGGAAGTGCCGTCAGAAG	39	1	chr17	16343350	16343388	+	EXACT	refGene	NR_045025	C17orf76-AS1	16342300	16373962	+	Homo sapiens C17orf76 antisense RNA 1 (non-protein coding) (C17orf76-AS1), transcript variant 28, non-coding RNA.	250	502	272	218	25	144	144	139	144	172	113	179.835	18.4026	165.906	102.879	132.001	119.805	66.71	414.602	109.915	128.387	163.527	111.557	176.628	1.4743	0.43633	1
srna5516415	TGCTCTGATGAAATCACTAATAGGAAGTGCCGTCAGAAG	39	1	chr17	16343350	16343388	+	EXACT	refGene	NR_045026	C17orf76-AS1	16342300	16344525	+	Homo sapiens C17orf76 antisense RNA 1 (non-protein coding) (C17orf76-AS1), transcript variant 29, non-coding RNA.	250	502	272	218	25	144	144	139	144	172	113	179.835	18.4026	165.906	102.879	132.001	119.805	66.71	414.602	109.915	128.387	163.527	111.557	176.628	1.4743	0.43633	1
srna5516415	TGCTCTGATGAAATCACTAATAGGAAGTGCCGTCAGAAG	39	1	chr17	16343350	16343388	+	EXACT	refGene	NR_045028	C17orf76-AS1	16342300	16345340	+	Homo sapiens C17orf76 antisense RNA 1 (non-protein coding) (C17orf76-AS1), transcript variant 31, non-coding RNA.	250	502	272	218	25	144	144	139	144	172	113	179.835	18.4026	165.906	102.879	132.001	119.805	66.71	414.602	109.915	128.387	163.527	111.557	176.628	1.4743	0.43633	1
srna5516415	TGCTCTGATGAAATCACTAATAGGAAGTGCCGTCAGAAG	39	1	chr17	16343350	16343388	+	EXACT	refGene	NR_045029	C17orf76-AS1	16342300	16345340	+	Homo sapiens C17orf76 antisense RNA 1 (non-protein coding) (C17orf76-AS1), transcript variant 32, non-coding RNA.	250	502	272	218	25	144	144	139	144	172	113	179.835	18.4026	165.906	102.879	132.001	119.805	66.71	414.602	109.915	128.387	163.527	111.557	176.628	1.4743	0.43633	1
srna5516348	TGCTCTGATGAAATCAC	17	1	chr17	16343350	16343366	+	EXACT	refGene	NR_027158	C17orf76-AS1	16342300	16345340	+	Homo sapiens C17orf76 antisense RNA 1 (non-protein coding) (C17orf76-AS1), transcript variant 2, non-coding RNA.	7	213	148	75	13	71	140	328	131	66	40	97.8512	9.56938	57.0776	50.7252	128.334	68.7116	23.6141	175.917	99.9924	49.2648	4.57875	263.242	70.6734	1.02855	0.959175	0
srna5516348	TGCTCTGATGAAATCAC	17	1	chr17	16343350	16343366	+	EXACT	refGene	NR_027163	C17orf76-AS1	16342300	16345340	+	Homo sapiens C17orf76 antisense RNA 1 (non-protein coding) (C17orf76-AS1), transcript variant 7, non-coding RNA.	7	213	148	75	13	71	140	328	131	66	40	97.8512	9.56938	57.0776	50.7252	128.334	68.7116	23.6141	175.917	99.9924	49.2648	4.57875	263.242	70.6734	1.02855	0.959175	0
srna5516348	TGCTCTGATGAAATCAC	17	1	chr17	16343350	16343366	+	EXACT	refGene	NR_027164	C17orf76-AS1	16342300	16345340	+	Homo sapiens C17orf76 antisense RNA 1 (non-protein coding) (C17orf76-AS1), transcript variant 8, non-coding RNA.	7	213	148	75	13	71	140	328	131	66	40	97.8512	9.56938	57.0776	50.7252	128.334	68.7116	23.6141	175.917	99.9924	49.2648	4.57875	263.242	70.6734	1.02855	0.959175	0
srna5516348	TGCTCTGATGAAATCAC	17	1	chr17	16343350	16343366	+	EXACT	refGene	NR_027165	C17orf76-AS1	16342300	16345340	+	Homo sapiens C17orf76 antisense RNA 1 (non-protein coding) (C17orf76-AS1), transcript variant 9, non-coding RNA.	7	213	148	75	13	71	140	328	131	66	40	97.8512	9.56938	57.0776	50.7252	128.334	68.7116	23.6141	175.917	99.9924	49.2648	4.57875	263.242	70.6734	1.02855	0.959175	0
srna5516348	TGCTCTGATGAAATCAC	17	1	chr17	16343350	16343366	+	EXACT	refGene	NR_027166	C17orf76-AS1	16342300	16345340	+	Homo sapiens C17orf76 antisense RNA 1 (non-protein coding) (C17orf76-AS1), transcript variant 10, non-coding RNA.	7	213	148	75	13	71	140	328	131	66	40	97.8512	9.56938	57.0776	50.7252	128.334	68.7116	23.6141	175.917	99.9924	49.2648	4.57875	263.242	70.6734	1.02855	0.959175	0
srna5516348	TGCTCTGATGAAATCAC	17	1	chr17	16343350	16343366	+	EXACT	refGene	NR_027167	C17orf76-AS1	16342300	16345340	+	Homo sapiens C17orf76 antisense RNA 1 (non-protein coding) (C17orf76-AS1), transcript variant 11, non-coding RNA.	7	213	148	75	13	71	140	328	131	66	40	97.8512	9.56938	57.0776	50.7252	128.334	68.7116	23.6141	175.917	99.9924	49.2648	4.57875	263.242	70.6734	1.02855	0.959175	0
srna5516348	TGCTCTGATGAAATCAC	17	1	chr17	16343350	16343366	+	EXACT	refGene	NR_027168	C17orf76-AS1	16342300	16345340	+	Homo sapiens C17orf76 antisense RNA 1 (non-protein coding) (C17orf76-AS1), transcript variant 12, non-coding RNA.	7	213	148	75	13	71	140	328	131	66	40	97.8512	9.56938	57.0776	50.7252	128.334	68.7116	23.6141	175.917	99.9924	49.2648	4.57875	263.242	70.6734	1.02855	0.959175	0
srna5516348	TGCTCTGATGAAATCAC	17	1	chr17	16343350	16343366	+	EXACT	refGene	NR_027169	C17orf76-AS1	16342300	16345340	+	Homo sapiens C17orf76 antisense RNA 1 (non-protein coding) (C17orf76-AS1), transcript variant 13, non-coding RNA.	7	213	148	75	13	71	140	328	131	66	40	97.8512	9.56938	57.0776	50.7252	128.334	68.7116	23.6141	175.917	99.9924	49.2648	4.57875	263.242	70.6734	1.02855	0.959175	0
srna5516348	TGCTCTGATGAAATCAC	17	1	chr17	16343350	16343366	+	EXACT	refGene	NR_027170	C17orf76-AS1	16342300	16345340	+	Homo sapiens C17orf76 antisense RNA 1 (non-protein coding) (C17orf76-AS1), transcript variant 14, non-coding RNA.	7	213	148	75	13	71	140	328	131	66	40	97.8512	9.56938	57.0776	50.7252	128.334	68.7116	23.6141	175.917	99.9924	49.2648	4.57875	263.242	70.6734	1.02855	0.959175	0
srna5516348	TGCTCTGATGAAATCAC	17	1	chr17	16343350	16343366	+	EXACT	refGene	NR_027172	C17orf76-AS1	16342300	16373962	+	Homo sapiens C17orf76 antisense RNA 1 (non-protein coding) (C17orf76-AS1), transcript variant 16, non-coding RNA.	7	213	148	75	13	71	140	328	131	66	40	97.8512	9.56938	57.0776	50.7252	128.334	68.7116	23.6141	175.917	99.9924	49.2648	4.57875	263.242	70.6734	1.02855	0.959175	0
srna5516348	TGCTCTGATGAAATCAC	17	1	chr17	16343350	16343366	+	EXACT	refGene	NR_027173	C17orf76-AS1	16342300	16373962	+	Homo sapiens C17orf76 antisense RNA 1 (non-protein coding) (C17orf76-AS1), transcript variant 17, non-coding RNA.	7	213	148	75	13	71	140	328	131	66	40	97.8512	9.56938	57.0776	50.7252	128.334	68.7116	23.6141	175.917	99.9924	49.2648	4.57875	263.242	70.6734	1.02855	0.959175	0
srna5516348	TGCTCTGATGAAATCAC	17	1	chr17	16343350	16343366	+	EXACT	refGene	NR_027174	C17orf76-AS1	16342300	16373962	+	Homo sapiens C17orf76 antisense RNA 1 (non-protein coding) (C17orf76-AS1), transcript variant 18, non-coding RNA.	7	213	148	75	13	71	140	328	131	66	40	97.8512	9.56938	57.0776	50.7252	128.334	68.7116	23.6141	175.917	99.9924	49.2648	4.57875	263.242	70.6734	1.02855	0.959175	0
srna5516348	TGCTCTGATGAAATCAC	17	1	chr17	16343350	16343366	+	EXACT	refGene	NR_027175	C17orf76-AS1	16342300	16373962	+	Homo sapiens C17orf76 antisense RNA 1 (non-protein coding) (C17orf76-AS1), transcript variant 19, non-coding RNA.	7	213	148	75	13	71	140	328	131	66	40	97.8512	9.56938	57.0776	50.7252	128.334	68.7116	23.6141	175.917	99.9924	49.2648	4.57875	263.242	70.6734	1.02855	0.959175	0
srna5516348	TGCTCTGATGAAATCAC	17	1	chr17	16343350	16343366	+	EXACT	refGene	NR_027176	C17orf76-AS1	16342300	16373962	+	Homo sapiens C17orf76 antisense RNA 1 (non-protein coding) (C17orf76-AS1), transcript variant 20, non-coding RNA.	7	213	148	75	13	71	140	328	131	66	40	97.8512	9.56938	57.0776	50.7252	128.334	68.7116	23.6141	175.917	99.9924	49.2648	4.57875	263.242	70.6734	1.02855	0.959175	0
srna5516348	TGCTCTGATGAAATCAC	17	1	chr17	16343350	16343366	+	EXACT	refGene	NR_027177	C17orf76-AS1	16342300	16373962	+	Homo sapiens C17orf76 antisense RNA 1 (non-protein coding) (C17orf76-AS1), transcript variant 21, non-coding RNA.	7	213	148	75	13	71	140	328	131	66	40	97.8512	9.56938	57.0776	50.7252	128.334	68.7116	23.6141	175.917	99.9924	49.2648	4.57875	263.242	70.6734	1.02855	0.959175	0
srna5516348	TGCTCTGATGAAATCAC	17	1	chr17	16343350	16343366	+	EXACT	refGene	NR_027178	C17orf76-AS1	16342300	16373962	+	Homo sapiens C17orf76 antisense RNA 1 (non-protein coding) (C17orf76-AS1), transcript variant 22, non-coding RNA.	7	213	148	75	13	71	140	328	131	66	40	97.8512	9.56938	57.0776	50.7252	128.334	68.7116	23.6141	175.917	99.9924	49.2648	4.57875	263.242	70.6734	1.02855	0.959175	0
srna5516348	TGCTCTGATGAAATCAC	17	1	chr17	16343350	16343366	+	EXACT	refGene	NR_027179	C17orf76-AS1	16342300	16344525	+	Homo sapiens C17orf76 antisense RNA 1 (non-protein coding) (C17orf76-AS1), transcript variant 23, non-coding RNA.	7	213	148	75	13	71	140	328	131	66	40	97.8512	9.56938	57.0776	50.7252	128.334	68.7116	23.6141	175.917	99.9924	49.2648	4.57875	263.242	70.6734	1.02855	0.959175	0
srna5516348	TGCTCTGATGAAATCAC	17	1	chr17	16343350	16343366	+	EXACT	refGene	NR_027667	C17orf76-AS1	16342300	16345340	+	Homo sapiens C17orf76 antisense RNA 1 (non-protein coding) (C17orf76-AS1), transcript variant 1, non-coding RNA.	7	213	148	75	13	71	140	328	131	66	40	97.8512	9.56938	57.0776	50.7252	128.334	68.7116	23.6141	175.917	99.9924	49.2648	4.57875	263.242	70.6734	1.02855	0.959175	0
srna5516348	TGCTCTGATGAAATCAC	17	1	chr17	16343350	16343366	+	EXACT	refGene	NR_045021	C17orf76-AS1	16342300	16345340	+	Homo sapiens C17orf76 antisense RNA 1 (non-protein coding) (C17orf76-AS1), transcript variant 24, non-coding RNA.	7	213	148	75	13	71	140	328	131	66	40	97.8512	9.56938	57.0776	50.7252	128.334	68.7116	23.6141	175.917	99.9924	49.2648	4.57875	263.242	70.6734	1.02855	0.959175	0
srna5516348	TGCTCTGATGAAATCAC	17	1	chr17	16343350	16343366	+	EXACT	refGene	NR_045022	C17orf76-AS1	16342300	16345340	+	Homo sapiens C17orf76 antisense RNA 1 (non-protein coding) (C17orf76-AS1), transcript variant 25, non-coding RNA.	7	213	148	75	13	71	140	328	131	66	40	97.8512	9.56938	57.0776	50.7252	128.334	68.7116	23.6141	175.917	99.9924	49.2648	4.57875	263.242	70.6734	1.02855	0.959175	0
srna5516348	TGCTCTGATGAAATCAC	17	1	chr17	16343350	16343366	+	EXACT	refGene	NR_045023	C17orf76-AS1	16342300	16373962	+	Homo sapiens C17orf76 antisense RNA 1 (non-protein coding) (C17orf76-AS1), transcript variant 26, non-coding RNA.	7	213	148	75	13	71	140	328	131	66	40	97.8512	9.56938	57.0776	50.7252	128.334	68.7116	23.6141	175.917	99.9924	49.2648	4.57875	263.242	70.6734	1.02855	0.959175	0
srna5516348	TGCTCTGATGAAATCAC	17	1	chr17	16343350	16343366	+	EXACT	refGene	NR_045025	C17orf76-AS1	16342300	16373962	+	Homo sapiens C17orf76 antisense RNA 1 (non-protein coding) (C17orf76-AS1), transcript variant 28, non-coding RNA.	7	213	148	75	13	71	140	328	131	66	40	97.8512	9.56938	57.0776	50.7252	128.334	68.7116	23.6141	175.917	99.9924	49.2648	4.57875	263.242	70.6734	1.02855	0.959175	0
srna5516348	TGCTCTGATGAAATCAC	17	1	chr17	16343350	16343366	+	EXACT	refGene	NR_045026	C17orf76-AS1	16342300	16344525	+	Homo sapiens C17orf76 antisense RNA 1 (non-protein coding) (C17orf76-AS1), transcript variant 29, non-coding RNA.	7	213	148	75	13	71	140	328	131	66	40	97.8512	9.56938	57.0776	50.7252	128.334	68.7116	23.6141	175.917	99.9924	49.2648	4.57875	263.242	70.6734	1.02855	0.959175	0
srna5516348	TGCTCTGATGAAATCAC	17	1	chr17	16343350	16343366	+	EXACT	refGene	NR_045028	C17orf76-AS1	16342300	16345340	+	Homo sapiens C17orf76 antisense RNA 1 (non-protein coding) (C17orf76-AS1), transcript variant 31, non-coding RNA.	7	213	148	75	13	71	140	328	131	66	40	97.8512	9.56938	57.0776	50.7252	128.334	68.7116	23.6141	175.917	99.9924	49.2648	4.57875	263.242	70.6734	1.02855	0.959175	0
srna5516348	TGCTCTGATGAAATCAC	17	1	chr17	16343350	16343366	+	EXACT	refGene	NR_045029	C17orf76-AS1	16342300	16345340	+	Homo sapiens C17orf76 antisense RNA 1 (non-protein coding) (C17orf76-AS1), transcript variant 32, non-coding RNA.	7	213	148	75	13	71	140	328	131	66	40	97.8512	9.56938	57.0776	50.7252	128.334	68.7116	23.6141	175.917	99.9924	49.2648	4.57875	263.242	70.6734	1.02855	0.959175	0
srna1451867	ATCAAATGATGAAATCACCCAAAATAGC	28	1	chr17	16344537	16344564	+	EXACT	refGene	NR_027158	C17orf76-AS1	16342300	16345340	+	Homo sapiens C17orf76 antisense RNA 1 (non-protein coding) (C17orf76-AS1), transcript variant 2, non-coding RNA.	19	55	14	26	9	22	8	26	29	8	8	9.2562	6.62495	19.7869	15.7177	7.33339	11.7438	4.72283	45.4245	22.1357	5.97149	12.428	20.8668	18.1365	1.54435	0.456543	0
srna1451867	ATCAAATGATGAAATCACCCAAAATAGC	28	1	chr17	16344537	16344564	+	EXACT	refGene	NR_027163	C17orf76-AS1	16342300	16345340	+	Homo sapiens C17orf76 antisense RNA 1 (non-protein coding) (C17orf76-AS1), transcript variant 7, non-coding RNA.	19	55	14	26	9	22	8	26	29	8	8	9.2562	6.62495	19.7869	15.7177	7.33339	11.7438	4.72283	45.4245	22.1357	5.97149	12.428	20.8668	18.1365	1.54435	0.456543	0
srna1451867	ATCAAATGATGAAATCACCCAAAATAGC	28	1	chr17	16344537	16344564	+	EXACT	refGene	NR_027164	C17orf76-AS1	16342300	16345340	+	Homo sapiens C17orf76 antisense RNA 1 (non-protein coding) (C17orf76-AS1), transcript variant 8, non-coding RNA.	19	55	14	26	9	22	8	26	29	8	8	9.2562	6.62495	19.7869	15.7177	7.33339	11.7438	4.72283	45.4245	22.1357	5.97149	12.428	20.8668	18.1365	1.54435	0.456543	0
srna1451867	ATCAAATGATGAAATCACCCAAAATAGC	28	1	chr17	16344537	16344564	+	EXACT	refGene	NR_027165	C17orf76-AS1	16342300	16345340	+	Homo sapiens C17orf76 antisense RNA 1 (non-protein coding) (C17orf76-AS1), transcript variant 9, non-coding RNA.	19	55	14	26	9	22	8	26	29	8	8	9.2562	6.62495	19.7869	15.7177	7.33339	11.7438	4.72283	45.4245	22.1357	5.97149	12.428	20.8668	18.1365	1.54435	0.456543	0
srna1451867	ATCAAATGATGAAATCACCCAAAATAGC	28	1	chr17	16344537	16344564	+	EXACT	refGene	NR_027166	C17orf76-AS1	16342300	16345340	+	Homo sapiens C17orf76 antisense RNA 1 (non-protein coding) (C17orf76-AS1), transcript variant 10, non-coding RNA.	19	55	14	26	9	22	8	26	29	8	8	9.2562	6.62495	19.7869	15.7177	7.33339	11.7438	4.72283	45.4245	22.1357	5.97149	12.428	20.8668	18.1365	1.54435	0.456543	0
srna1451867	ATCAAATGATGAAATCACCCAAAATAGC	28	1	chr17	16344537	16344564	+	EXACT	refGene	NR_027167	C17orf76-AS1	16342300	16345340	+	Homo sapiens C17orf76 antisense RNA 1 (non-protein coding) (C17orf76-AS1), transcript variant 11, non-coding RNA.	19	55	14	26	9	22	8	26	29	8	8	9.2562	6.62495	19.7869	15.7177	7.33339	11.7438	4.72283	45.4245	22.1357	5.97149	12.428	20.8668	18.1365	1.54435	0.456543	0
srna1451867	ATCAAATGATGAAATCACCCAAAATAGC	28	1	chr17	16344537	16344564	+	EXACT	refGene	NR_027168	C17orf76-AS1	16342300	16345340	+	Homo sapiens C17orf76 antisense RNA 1 (non-protein coding) (C17orf76-AS1), transcript variant 12, non-coding RNA.	19	55	14	26	9	22	8	26	29	8	8	9.2562	6.62495	19.7869	15.7177	7.33339	11.7438	4.72283	45.4245	22.1357	5.97149	12.428	20.8668	18.1365	1.54435	0.456543	0
srna1451867	ATCAAATGATGAAATCACCCAAAATAGC	28	1	chr17	16344537	16344564	+	EXACT	refGene	NR_027169	C17orf76-AS1	16342300	16345340	+	Homo sapiens C17orf76 antisense RNA 1 (non-protein coding) (C17orf76-AS1), transcript variant 13, non-coding RNA.	19	55	14	26	9	22	8	26	29	8	8	9.2562	6.62495	19.7869	15.7177	7.33339	11.7438	4.72283	45.4245	22.1357	5.97149	12.428	20.8668	18.1365	1.54435	0.456543	0
srna1451867	ATCAAATGATGAAATCACCCAAAATAGC	28	1	chr17	16344537	16344564	+	EXACT	refGene	NR_027170	C17orf76-AS1	16342300	16345340	+	Homo sapiens C17orf76 antisense RNA 1 (non-protein coding) (C17orf76-AS1), transcript variant 14, non-coding RNA.	19	55	14	26	9	22	8	26	29	8	8	9.2562	6.62495	19.7869	15.7177	7.33339	11.7438	4.72283	45.4245	22.1357	5.97149	12.428	20.8668	18.1365	1.54435	0.456543	0
srna1451867	ATCAAATGATGAAATCACCCAAAATAGC	28	1	chr17	16344537	16344564	+	EXACT	refGene	NR_027172	C17orf76-AS1	16342300	16373962	+	Homo sapiens C17orf76 antisense RNA 1 (non-protein coding) (C17orf76-AS1), transcript variant 16, non-coding RNA.	19	55	14	26	9	22	8	26	29	8	8	9.2562	6.62495	19.7869	15.7177	7.33339	11.7438	4.72283	45.4245	22.1357	5.97149	12.428	20.8668	18.1365	1.54435	0.456543	0
srna1451867	ATCAAATGATGAAATCACCCAAAATAGC	28	1	chr17	16344537	16344564	+	EXACT	refGene	NR_027173	C17orf76-AS1	16342300	16373962	+	Homo sapiens C17orf76 antisense RNA 1 (non-protein coding) (C17orf76-AS1), transcript variant 17, non-coding RNA.	19	55	14	26	9	22	8	26	29	8	8	9.2562	6.62495	19.7869	15.7177	7.33339	11.7438	4.72283	45.4245	22.1357	5.97149	12.428	20.8668	18.1365	1.54435	0.456543	0
srna1451867	ATCAAATGATGAAATCACCCAAAATAGC	28	1	chr17	16344537	16344564	+	EXACT	refGene	NR_027174	C17orf76-AS1	16342300	16373962	+	Homo sapiens C17orf76 antisense RNA 1 (non-protein coding) (C17orf76-AS1), transcript variant 18, non-coding RNA.	19	55	14	26	9	22	8	26	29	8	8	9.2562	6.62495	19.7869	15.7177	7.33339	11.7438	4.72283	45.4245	22.1357	5.97149	12.428	20.8668	18.1365	1.54435	0.456543	0
srna1451867	ATCAAATGATGAAATCACCCAAAATAGC	28	1	chr17	16344537	16344564	+	EXACT	refGene	NR_027175	C17orf76-AS1	16342300	16373962	+	Homo sapiens C17orf76 antisense RNA 1 (non-protein coding) (C17orf76-AS1), transcript variant 19, non-coding RNA.	19	55	14	26	9	22	8	26	29	8	8	9.2562	6.62495	19.7869	15.7177	7.33339	11.7438	4.72283	45.4245	22.1357	5.97149	12.428	20.8668	18.1365	1.54435	0.456543	0
srna1451867	ATCAAATGATGAAATCACCCAAAATAGC	28	1	chr17	16344537	16344564	+	EXACT	refGene	NR_027176	C17orf76-AS1	16342300	16373962	+	Homo sapiens C17orf76 antisense RNA 1 (non-protein coding) (C17orf76-AS1), transcript variant 20, non-coding RNA.	19	55	14	26	9	22	8	26	29	8	8	9.2562	6.62495	19.7869	15.7177	7.33339	11.7438	4.72283	45.4245	22.1357	5.97149	12.428	20.8668	18.1365	1.54435	0.456543	0
srna1451867	ATCAAATGATGAAATCACCCAAAATAGC	28	1	chr17	16344537	16344564	+	EXACT	refGene	NR_027177	C17orf76-AS1	16342300	16373962	+	Homo sapiens C17orf76 antisense RNA 1 (non-protein coding) (C17orf76-AS1), transcript variant 21, non-coding RNA.	19	55	14	26	9	22	8	26	29	8	8	9.2562	6.62495	19.7869	15.7177	7.33339	11.7438	4.72283	45.4245	22.1357	5.97149	12.428	20.8668	18.1365	1.54435	0.456543	0
srna1451867	ATCAAATGATGAAATCACCCAAAATAGC	28	1	chr17	16344537	16344564	+	EXACT	refGene	NR_027178	C17orf76-AS1	16342300	16373962	+	Homo sapiens C17orf76 antisense RNA 1 (non-protein coding) (C17orf76-AS1), transcript variant 22, non-coding RNA.	19	55	14	26	9	22	8	26	29	8	8	9.2562	6.62495	19.7869	15.7177	7.33339	11.7438	4.72283	45.4245	22.1357	5.97149	12.428	20.8668	18.1365	1.54435	0.456543	0
srna1451867	ATCAAATGATGAAATCACCCAAAATAGC	28	1	chr17	16344537	16344564	+	EXACT	refGene	NR_027667	C17orf76-AS1	16342300	16345340	+	Homo sapiens C17orf76 antisense RNA 1 (non-protein coding) (C17orf76-AS1), transcript variant 1, non-coding RNA.	19	55	14	26	9	22	8	26	29	8	8	9.2562	6.62495	19.7869	15.7177	7.33339	11.7438	4.72283	45.4245	22.1357	5.97149	12.428	20.8668	18.1365	1.54435	0.456543	0
srna1451867	ATCAAATGATGAAATCACCCAAAATAGC	28	1	chr17	16344537	16344564	+	EXACT	refGene	NR_045021	C17orf76-AS1	16342300	16345340	+	Homo sapiens C17orf76 antisense RNA 1 (non-protein coding) (C17orf76-AS1), transcript variant 24, non-coding RNA.	19	55	14	26	9	22	8	26	29	8	8	9.2562	6.62495	19.7869	15.7177	7.33339	11.7438	4.72283	45.4245	22.1357	5.97149	12.428	20.8668	18.1365	1.54435	0.456543	0
srna1451867	ATCAAATGATGAAATCACCCAAAATAGC	28	1	chr17	16344537	16344564	+	EXACT	refGene	NR_045022	C17orf76-AS1	16342300	16345340	+	Homo sapiens C17orf76 antisense RNA 1 (non-protein coding) (C17orf76-AS1), transcript variant 25, non-coding RNA.	19	55	14	26	9	22	8	26	29	8	8	9.2562	6.62495	19.7869	15.7177	7.33339	11.7438	4.72283	45.4245	22.1357	5.97149	12.428	20.8668	18.1365	1.54435	0.456543	0
srna1451867	ATCAAATGATGAAATCACCCAAAATAGC	28	1	chr17	16344537	16344564	+	EXACT	refGene	NR_045023	C17orf76-AS1	16342300	16373962	+	Homo sapiens C17orf76 antisense RNA 1 (non-protein coding) (C17orf76-AS1), transcript variant 26, non-coding RNA.	19	55	14	26	9	22	8	26	29	8	8	9.2562	6.62495	19.7869	15.7177	7.33339	11.7438	4.72283	45.4245	22.1357	5.97149	12.428	20.8668	18.1365	1.54435	0.456543	0
srna1451867	ATCAAATGATGAAATCACCCAAAATAGC	28	1	chr17	16344537	16344564	+	EXACT	refGene	NR_045025	C17orf76-AS1	16342300	16373962	+	Homo sapiens C17orf76 antisense RNA 1 (non-protein coding) (C17orf76-AS1), transcript variant 28, non-coding RNA.	19	55	14	26	9	22	8	26	29	8	8	9.2562	6.62495	19.7869	15.7177	7.33339	11.7438	4.72283	45.4245	22.1357	5.97149	12.428	20.8668	18.1365	1.54435	0.456543	0
srna1451867	ATCAAATGATGAAATCACCCAAAATAGC	28	1	chr17	16344537	16344564	+	EXACT	refGene	NR_045028	C17orf76-AS1	16342300	16345340	+	Homo sapiens C17orf76 antisense RNA 1 (non-protein coding) (C17orf76-AS1), transcript variant 31, non-coding RNA.	19	55	14	26	9	22	8	26	29	8	8	9.2562	6.62495	19.7869	15.7177	7.33339	11.7438	4.72283	45.4245	22.1357	5.97149	12.428	20.8668	18.1365	1.54435	0.456543	0
srna1451867	ATCAAATGATGAAATCACCCAAAATAGC	28	1	chr17	16344537	16344564	+	EXACT	refGene	NR_045029	C17orf76-AS1	16342300	16345340	+	Homo sapiens C17orf76 antisense RNA 1 (non-protein coding) (C17orf76-AS1), transcript variant 32, non-coding RNA.	19	55	14	26	9	22	8	26	29	8	8	9.2562	6.62495	19.7869	15.7177	7.33339	11.7438	4.72283	45.4245	22.1357	5.97149	12.428	20.8668	18.1365	1.54435	0.456543	0
srna5516363	TGCTCTGATGAAATCACTA	19	1	chr17	16343350	16343368	+	EXACT	refGene	NR_027158	C17orf76-AS1	16342300	16345340	+	Homo sapiens C17orf76 antisense RNA 1 (non-protein coding) (C17orf76-AS1), transcript variant 2, non-coding RNA.	2	17	27	8	4	7	22	29	12	6	3	17.8512	2.94442	6.08828	5.00107	20.1668	10.4104	1.77106	14.0403	9.15961	4.47861	1.30822	23.2745	6.15156	0.590907	0.355518	0
srna5516363	TGCTCTGATGAAATCACTA	19	1	chr17	16343350	16343368	+	EXACT	refGene	NR_027163	C17orf76-AS1	16342300	16345340	+	Homo sapiens C17orf76 antisense RNA 1 (non-protein coding) (C17orf76-AS1), transcript variant 7, non-coding RNA.	2	17	27	8	4	7	22	29	12	6	3	17.8512	2.94442	6.08828	5.00107	20.1668	10.4104	1.77106	14.0403	9.15961	4.47861	1.30822	23.2745	6.15156	0.590907	0.355518	0
srna5516363	TGCTCTGATGAAATCACTA	19	1	chr17	16343350	16343368	+	EXACT	refGene	NR_027164	C17orf76-AS1	16342300	16345340	+	Homo sapiens C17orf76 antisense RNA 1 (non-protein coding) (C17orf76-AS1), transcript variant 8, non-coding RNA.	2	17	27	8	4	7	22	29	12	6	3	17.8512	2.94442	6.08828	5.00107	20.1668	10.4104	1.77106	14.0403	9.15961	4.47861	1.30822	23.2745	6.15156	0.590907	0.355518	0
srna5516363	TGCTCTGATGAAATCACTA	19	1	chr17	16343350	16343368	+	EXACT	refGene	NR_027165	C17orf76-AS1	16342300	16345340	+	Homo sapiens C17orf76 antisense RNA 1 (non-protein coding) (C17orf76-AS1), transcript variant 9, non-coding RNA.	2	17	27	8	4	7	22	29	12	6	3	17.8512	2.94442	6.08828	5.00107	20.1668	10.4104	1.77106	14.0403	9.15961	4.47861	1.30822	23.2745	6.15156	0.590907	0.355518	0
srna5516363	TGCTCTGATGAAATCACTA	19	1	chr17	16343350	16343368	+	EXACT	refGene	NR_027166	C17orf76-AS1	16342300	16345340	+	Homo sapiens C17orf76 antisense RNA 1 (non-protein coding) (C17orf76-AS1), transcript variant 10, non-coding RNA.	2	17	27	8	4	7	22	29	12	6	3	17.8512	2.94442	6.08828	5.00107	20.1668	10.4104	1.77106	14.0403	9.15961	4.47861	1.30822	23.2745	6.15156	0.590907	0.355518	0
srna5516363	TGCTCTGATGAAATCACTA	19	1	chr17	16343350	16343368	+	EXACT	refGene	NR_027167	C17orf76-AS1	16342300	16345340	+	Homo sapiens C17orf76 antisense RNA 1 (non-protein coding) (C17orf76-AS1), transcript variant 11, non-coding RNA.	2	17	27	8	4	7	22	29	12	6	3	17.8512	2.94442	6.08828	5.00107	20.1668	10.4104	1.77106	14.0403	9.15961	4.47861	1.30822	23.2745	6.15156	0.590907	0.355518	0
srna5516363	TGCTCTGATGAAATCACTA	19	1	chr17	16343350	16343368	+	EXACT	refGene	NR_027168	C17orf76-AS1	16342300	16345340	+	Homo sapiens C17orf76 antisense RNA 1 (non-protein coding) (C17orf76-AS1), transcript variant 12, non-coding RNA.	2	17	27	8	4	7	22	29	12	6	3	17.8512	2.94442	6.08828	5.00107	20.1668	10.4104	1.77106	14.0403	9.15961	4.47861	1.30822	23.2745	6.15156	0.590907	0.355518	0
srna5516363	TGCTCTGATGAAATCACTA	19	1	chr17	16343350	16343368	+	EXACT	refGene	NR_027169	C17orf76-AS1	16342300	16345340	+	Homo sapiens C17orf76 antisense RNA 1 (non-protein coding) (C17orf76-AS1), transcript variant 13, non-coding RNA.	2	17	27	8	4	7	22	29	12	6	3	17.8512	2.94442	6.08828	5.00107	20.1668	10.4104	1.77106	14.0403	9.15961	4.47861	1.30822	23.2745	6.15156	0.590907	0.355518	0
srna5516363	TGCTCTGATGAAATCACTA	19	1	chr17	16343350	16343368	+	EXACT	refGene	NR_027170	C17orf76-AS1	16342300	16345340	+	Homo sapiens C17orf76 antisense RNA 1 (non-protein coding) (C17orf76-AS1), transcript variant 14, non-coding RNA.	2	17	27	8	4	7	22	29	12	6	3	17.8512	2.94442	6.08828	5.00107	20.1668	10.4104	1.77106	14.0403	9.15961	4.47861	1.30822	23.2745	6.15156	0.590907	0.355518	0
srna5516363	TGCTCTGATGAAATCACTA	19	1	chr17	16343350	16343368	+	EXACT	refGene	NR_027172	C17orf76-AS1	16342300	16373962	+	Homo sapiens C17orf76 antisense RNA 1 (non-protein coding) (C17orf76-AS1), transcript variant 16, non-coding RNA.	2	17	27	8	4	7	22	29	12	6	3	17.8512	2.94442	6.08828	5.00107	20.1668	10.4104	1.77106	14.0403	9.15961	4.47861	1.30822	23.2745	6.15156	0.590907	0.355518	0
srna5516363	TGCTCTGATGAAATCACTA	19	1	chr17	16343350	16343368	+	EXACT	refGene	NR_027173	C17orf76-AS1	16342300	16373962	+	Homo sapiens C17orf76 antisense RNA 1 (non-protein coding) (C17orf76-AS1), transcript variant 17, non-coding RNA.	2	17	27	8	4	7	22	29	12	6	3	17.8512	2.94442	6.08828	5.00107	20.1668	10.4104	1.77106	14.0403	9.15961	4.47861	1.30822	23.2745	6.15156	0.590907	0.355518	0
srna5516363	TGCTCTGATGAAATCACTA	19	1	chr17	16343350	16343368	+	EXACT	refGene	NR_027174	C17orf76-AS1	16342300	16373962	+	Homo sapiens C17orf76 antisense RNA 1 (non-protein coding) (C17orf76-AS1), transcript variant 18, non-coding RNA.	2	17	27	8	4	7	22	29	12	6	3	17.8512	2.94442	6.08828	5.00107	20.1668	10.4104	1.77106	14.0403	9.15961	4.47861	1.30822	23.2745	6.15156	0.590907	0.355518	0
srna5516363	TGCTCTGATGAAATCACTA	19	1	chr17	16343350	16343368	+	EXACT	refGene	NR_027175	C17orf76-AS1	16342300	16373962	+	Homo sapiens C17orf76 antisense RNA 1 (non-protein coding) (C17orf76-AS1), transcript variant 19, non-coding RNA.	2	17	27	8	4	7	22	29	12	6	3	17.8512	2.94442	6.08828	5.00107	20.1668	10.4104	1.77106	14.0403	9.15961	4.47861	1.30822	23.2745	6.15156	0.590907	0.355518	0
srna5516363	TGCTCTGATGAAATCACTA	19	1	chr17	16343350	16343368	+	EXACT	refGene	NR_027176	C17orf76-AS1	16342300	16373962	+	Homo sapiens C17orf76 antisense RNA 1 (non-protein coding) (C17orf76-AS1), transcript variant 20, non-coding RNA.	2	17	27	8	4	7	22	29	12	6	3	17.8512	2.94442	6.08828	5.00107	20.1668	10.4104	1.77106	14.0403	9.15961	4.47861	1.30822	23.2745	6.15156	0.590907	0.355518	0
srna5516363	TGCTCTGATGAAATCACTA	19	1	chr17	16343350	16343368	+	EXACT	refGene	NR_027177	C17orf76-AS1	16342300	16373962	+	Homo sapiens C17orf76 antisense RNA 1 (non-protein coding) (C17orf76-AS1), transcript variant 21, non-coding RNA.	2	17	27	8	4	7	22	29	12	6	3	17.8512	2.94442	6.08828	5.00107	20.1668	10.4104	1.77106	14.0403	9.15961	4.47861	1.30822	23.2745	6.15156	0.590907	0.355518	0
srna5516363	TGCTCTGATGAAATCACTA	19	1	chr17	16343350	16343368	+	EXACT	refGene	NR_027178	C17orf76-AS1	16342300	16373962	+	Homo sapiens C17orf76 antisense RNA 1 (non-protein coding) (C17orf76-AS1), transcript variant 22, non-coding RNA.	2	17	27	8	4	7	22	29	12	6	3	17.8512	2.94442	6.08828	5.00107	20.1668	10.4104	1.77106	14.0403	9.15961	4.47861	1.30822	23.2745	6.15156	0.590907	0.355518	0
srna5516363	TGCTCTGATGAAATCACTA	19	1	chr17	16343350	16343368	+	EXACT	refGene	NR_027179	C17orf76-AS1	16342300	16344525	+	Homo sapiens C17orf76 antisense RNA 1 (non-protein coding) (C17orf76-AS1), transcript variant 23, non-coding RNA.	2	17	27	8	4	7	22	29	12	6	3	17.8512	2.94442	6.08828	5.00107	20.1668	10.4104	1.77106	14.0403	9.15961	4.47861	1.30822	23.2745	6.15156	0.590907	0.355518	0
srna5516363	TGCTCTGATGAAATCACTA	19	1	chr17	16343350	16343368	+	EXACT	refGene	NR_027667	C17orf76-AS1	16342300	16345340	+	Homo sapiens C17orf76 antisense RNA 1 (non-protein coding) (C17orf76-AS1), transcript variant 1, non-coding RNA.	2	17	27	8	4	7	22	29	12	6	3	17.8512	2.94442	6.08828	5.00107	20.1668	10.4104	1.77106	14.0403	9.15961	4.47861	1.30822	23.2745	6.15156	0.590907	0.355518	0
srna5516363	TGCTCTGATGAAATCACTA	19	1	chr17	16343350	16343368	+	EXACT	refGene	NR_045021	C17orf76-AS1	16342300	16345340	+	Homo sapiens C17orf76 antisense RNA 1 (non-protein coding) (C17orf76-AS1), transcript variant 24, non-coding RNA.	2	17	27	8	4	7	22	29	12	6	3	17.8512	2.94442	6.08828	5.00107	20.1668	10.4104	1.77106	14.0403	9.15961	4.47861	1.30822	23.2745	6.15156	0.590907	0.355518	0
srna5516363	TGCTCTGATGAAATCACTA	19	1	chr17	16343350	16343368	+	EXACT	refGene	NR_045022	C17orf76-AS1	16342300	16345340	+	Homo sapiens C17orf76 antisense RNA 1 (non-protein coding) (C17orf76-AS1), transcript variant 25, non-coding RNA.	2	17	27	8	4	7	22	29	12	6	3	17.8512	2.94442	6.08828	5.00107	20.1668	10.4104	1.77106	14.0403	9.15961	4.47861	1.30822	23.2745	6.15156	0.590907	0.355518	0
srna5516363	TGCTCTGATGAAATCACTA	19	1	chr17	16343350	16343368	+	EXACT	refGene	NR_045023	C17orf76-AS1	16342300	16373962	+	Homo sapiens C17orf76 antisense RNA 1 (non-protein coding) (C17orf76-AS1), transcript variant 26, non-coding RNA.	2	17	27	8	4	7	22	29	12	6	3	17.8512	2.94442	6.08828	5.00107	20.1668	10.4104	1.77106	14.0403	9.15961	4.47861	1.30822	23.2745	6.15156	0.590907	0.355518	0
srna5516363	TGCTCTGATGAAATCACTA	19	1	chr17	16343350	16343368	+	EXACT	refGene	NR_045025	C17orf76-AS1	16342300	16373962	+	Homo sapiens C17orf76 antisense RNA 1 (non-protein coding) (C17orf76-AS1), transcript variant 28, non-coding RNA.	2	17	27	8	4	7	22	29	12	6	3	17.8512	2.94442	6.08828	5.00107	20.1668	10.4104	1.77106	14.0403	9.15961	4.47861	1.30822	23.2745	6.15156	0.590907	0.355518	0
srna5516363	TGCTCTGATGAAATCACTA	19	1	chr17	16343350	16343368	+	EXACT	refGene	NR_045026	C17orf76-AS1	16342300	16344525	+	Homo sapiens C17orf76 antisense RNA 1 (non-protein coding) (C17orf76-AS1), transcript variant 29, non-coding RNA.	2	17	27	8	4	7	22	29	12	6	3	17.8512	2.94442	6.08828	5.00107	20.1668	10.4104	1.77106	14.0403	9.15961	4.47861	1.30822	23.2745	6.15156	0.590907	0.355518	0
srna5516363	TGCTCTGATGAAATCACTA	19	1	chr17	16343350	16343368	+	EXACT	refGene	NR_045028	C17orf76-AS1	16342300	16345340	+	Homo sapiens C17orf76 antisense RNA 1 (non-protein coding) (C17orf76-AS1), transcript variant 31, non-coding RNA.	2	17	27	8	4	7	22	29	12	6	3	17.8512	2.94442	6.08828	5.00107	20.1668	10.4104	1.77106	14.0403	9.15961	4.47861	1.30822	23.2745	6.15156	0.590907	0.355518	0
srna5516363	TGCTCTGATGAAATCACTA	19	1	chr17	16343350	16343368	+	EXACT	refGene	NR_045029	C17orf76-AS1	16342300	16345340	+	Homo sapiens C17orf76 antisense RNA 1 (non-protein coding) (C17orf76-AS1), transcript variant 32, non-coding RNA.	2	17	27	8	4	7	22	29	12	6	3	17.8512	2.94442	6.08828	5.00107	20.1668	10.4104	1.77106	14.0403	9.15961	4.47861	1.30822	23.2745	6.15156	0.590907	0.355518	0
srna3568910	GATAACTGACGAAGACTACTCCTGTCTGATT	31	1	chr17	16343390	16343420	+	EXACT	refGene	NR_027158	C17orf76-AS1	16342300	16345340	+	Homo sapiens C17orf76 antisense RNA 1 (non-protein coding) (C17orf76-AS1), transcript variant 2, non-coding RNA.	5	2	21	19	11	7	10	10	5	2	2	13.8843	8.09717	14.4597	5.00107	9.16674	10.1218	1.18071	1.6518	3.8165	1.49287	3.27054	8.02568	2.28248	0.225502	0.00978762	0
srna3568910	GATAACTGACGAAGACTACTCCTGTCTGATT	31	1	chr17	16343390	16343420	+	EXACT	refGene	NR_027163	C17orf76-AS1	16342300	16345340	+	Homo sapiens C17orf76 antisense RNA 1 (non-protein coding) (C17orf76-AS1), transcript variant 7, non-coding RNA.	5	2	21	19	11	7	10	10	5	2	2	13.8843	8.09717	14.4597	5.00107	9.16674	10.1218	1.18071	1.6518	3.8165	1.49287	3.27054	8.02568	2.28248	0.225502	0.00978762	0
srna3568910	GATAACTGACGAAGACTACTCCTGTCTGATT	31	1	chr17	16343390	16343420	+	EXACT	refGene	NR_027164	C17orf76-AS1	16342300	16345340	+	Homo sapiens C17orf76 antisense RNA 1 (non-protein coding) (C17orf76-AS1), transcript variant 8, non-coding RNA.	5	2	21	19	11	7	10	10	5	2	2	13.8843	8.09717	14.4597	5.00107	9.16674	10.1218	1.18071	1.6518	3.8165	1.49287	3.27054	8.02568	2.28248	0.225502	0.00978762	0
srna3568910	GATAACTGACGAAGACTACTCCTGTCTGATT	31	1	chr17	16343390	16343420	+	EXACT	refGene	NR_027165	C17orf76-AS1	16342300	16345340	+	Homo sapiens C17orf76 antisense RNA 1 (non-protein coding) (C17orf76-AS1), transcript variant 9, non-coding RNA.	5	2	21	19	11	7	10	10	5	2	2	13.8843	8.09717	14.4597	5.00107	9.16674	10.1218	1.18071	1.6518	3.8165	1.49287	3.27054	8.02568	2.28248	0.225502	0.00978762	0
srna3568910	GATAACTGACGAAGACTACTCCTGTCTGATT	31	1	chr17	16343390	16343420	+	EXACT	refGene	NR_027166	C17orf76-AS1	16342300	16345340	+	Homo sapiens C17orf76 antisense RNA 1 (non-protein coding) (C17orf76-AS1), transcript variant 10, non-coding RNA.	5	2	21	19	11	7	10	10	5	2	2	13.8843	8.09717	14.4597	5.00107	9.16674	10.1218	1.18071	1.6518	3.8165	1.49287	3.27054	8.02568	2.28248	0.225502	0.00978762	0
srna3568910	GATAACTGACGAAGACTACTCCTGTCTGATT	31	1	chr17	16343390	16343420	+	EXACT	refGene	NR_027167	C17orf76-AS1	16342300	16345340	+	Homo sapiens C17orf76 antisense RNA 1 (non-protein coding) (C17orf76-AS1), transcript variant 11, non-coding RNA.	5	2	21	19	11	7	10	10	5	2	2	13.8843	8.09717	14.4597	5.00107	9.16674	10.1218	1.18071	1.6518	3.8165	1.49287	3.27054	8.02568	2.28248	0.225502	0.00978762	0
srna3568910	GATAACTGACGAAGACTACTCCTGTCTGATT	31	1	chr17	16343390	16343420	+	EXACT	refGene	NR_027168	C17orf76-AS1	16342300	16345340	+	Homo sapiens C17orf76 antisense RNA 1 (non-protein coding) (C17orf76-AS1), transcript variant 12, non-coding RNA.	5	2	21	19	11	7	10	10	5	2	2	13.8843	8.09717	14.4597	5.00107	9.16674	10.1218	1.18071	1.6518	3.8165	1.49287	3.27054	8.02568	2.28248	0.225502	0.00978762	0
srna3568910	GATAACTGACGAAGACTACTCCTGTCTGATT	31	1	chr17	16343390	16343420	+	EXACT	refGene	NR_027169	C17orf76-AS1	16342300	16345340	+	Homo sapiens C17orf76 antisense RNA 1 (non-protein coding) (C17orf76-AS1), transcript variant 13, non-coding RNA.	5	2	21	19	11	7	10	10	5	2	2	13.8843	8.09717	14.4597	5.00107	9.16674	10.1218	1.18071	1.6518	3.8165	1.49287	3.27054	8.02568	2.28248	0.225502	0.00978762	0
srna3568910	GATAACTGACGAAGACTACTCCTGTCTGATT	31	1	chr17	16343390	16343420	+	EXACT	refGene	NR_027170	C17orf76-AS1	16342300	16345340	+	Homo sapiens C17orf76 antisense RNA 1 (non-protein coding) (C17orf76-AS1), transcript variant 14, non-coding RNA.	5	2	21	19	11	7	10	10	5	2	2	13.8843	8.09717	14.4597	5.00107	9.16674	10.1218	1.18071	1.6518	3.8165	1.49287	3.27054	8.02568	2.28248	0.225502	0.00978762	0
srna3568910	GATAACTGACGAAGACTACTCCTGTCTGATT	31	1	chr17	16343390	16343420	+	EXACT	refGene	NR_027172	C17orf76-AS1	16342300	16373962	+	Homo sapiens C17orf76 antisense RNA 1 (non-protein coding) (C17orf76-AS1), transcript variant 16, non-coding RNA.	5	2	21	19	11	7	10	10	5	2	2	13.8843	8.09717	14.4597	5.00107	9.16674	10.1218	1.18071	1.6518	3.8165	1.49287	3.27054	8.02568	2.28248	0.225502	0.00978762	0
srna3568910	GATAACTGACGAAGACTACTCCTGTCTGATT	31	1	chr17	16343390	16343420	+	EXACT	refGene	NR_027173	C17orf76-AS1	16342300	16373962	+	Homo sapiens C17orf76 antisense RNA 1 (non-protein coding) (C17orf76-AS1), transcript variant 17, non-coding RNA.	5	2	21	19	11	7	10	10	5	2	2	13.8843	8.09717	14.4597	5.00107	9.16674	10.1218	1.18071	1.6518	3.8165	1.49287	3.27054	8.02568	2.28248	0.225502	0.00978762	0
srna3568910	GATAACTGACGAAGACTACTCCTGTCTGATT	31	1	chr17	16343390	16343420	+	EXACT	refGene	NR_027174	C17orf76-AS1	16342300	16373962	+	Homo sapiens C17orf76 antisense RNA 1 (non-protein coding) (C17orf76-AS1), transcript variant 18, non-coding RNA.	5	2	21	19	11	7	10	10	5	2	2	13.8843	8.09717	14.4597	5.00107	9.16674	10.1218	1.18071	1.6518	3.8165	1.49287	3.27054	8.02568	2.28248	0.225502	0.00978762	0
srna3568910	GATAACTGACGAAGACTACTCCTGTCTGATT	31	1	chr17	16343390	16343420	+	EXACT	refGene	NR_027175	C17orf76-AS1	16342300	16373962	+	Homo sapiens C17orf76 antisense RNA 1 (non-protein coding) (C17orf76-AS1), transcript variant 19, non-coding RNA.	5	2	21	19	11	7	10	10	5	2	2	13.8843	8.09717	14.4597	5.00107	9.16674	10.1218	1.18071	1.6518	3.8165	1.49287	3.27054	8.02568	2.28248	0.225502	0.00978762	0
srna3568910	GATAACTGACGAAGACTACTCCTGTCTGATT	31	1	chr17	16343390	16343420	+	EXACT	refGene	NR_027176	C17orf76-AS1	16342300	16373962	+	Homo sapiens C17orf76 antisense RNA 1 (non-protein coding) (C17orf76-AS1), transcript variant 20, non-coding RNA.	5	2	21	19	11	7	10	10	5	2	2	13.8843	8.09717	14.4597	5.00107	9.16674	10.1218	1.18071	1.6518	3.8165	1.49287	3.27054	8.02568	2.28248	0.225502	0.00978762	0
srna3568910	GATAACTGACGAAGACTACTCCTGTCTGATT	31	1	chr17	16343390	16343420	+	EXACT	refGene	NR_027177	C17orf76-AS1	16342300	16373962	+	Homo sapiens C17orf76 antisense RNA 1 (non-protein coding) (C17orf76-AS1), transcript variant 21, non-coding RNA.	5	2	21	19	11	7	10	10	5	2	2	13.8843	8.09717	14.4597	5.00107	9.16674	10.1218	1.18071	1.6518	3.8165	1.49287	3.27054	8.02568	2.28248	0.225502	0.00978762	0
srna3568910	GATAACTGACGAAGACTACTCCTGTCTGATT	31	1	chr17	16343390	16343420	+	EXACT	refGene	NR_027178	C17orf76-AS1	16342300	16373962	+	Homo sapiens C17orf76 antisense RNA 1 (non-protein coding) (C17orf76-AS1), transcript variant 22, non-coding RNA.	5	2	21	19	11	7	10	10	5	2	2	13.8843	8.09717	14.4597	5.00107	9.16674	10.1218	1.18071	1.6518	3.8165	1.49287	3.27054	8.02568	2.28248	0.225502	0.00978762	0
srna3568910	GATAACTGACGAAGACTACTCCTGTCTGATT	31	1	chr17	16343390	16343420	+	EXACT	refGene	NR_027179	C17orf76-AS1	16342300	16344525	+	Homo sapiens C17orf76 antisense RNA 1 (non-protein coding) (C17orf76-AS1), transcript variant 23, non-coding RNA.	5	2	21	19	11	7	10	10	5	2	2	13.8843	8.09717	14.4597	5.00107	9.16674	10.1218	1.18071	1.6518	3.8165	1.49287	3.27054	8.02568	2.28248	0.225502	0.00978762	0
srna3568910	GATAACTGACGAAGACTACTCCTGTCTGATT	31	1	chr17	16343390	16343420	+	EXACT	refGene	NR_027667	C17orf76-AS1	16342300	16345340	+	Homo sapiens C17orf76 antisense RNA 1 (non-protein coding) (C17orf76-AS1), transcript variant 1, non-coding RNA.	5	2	21	19	11	7	10	10	5	2	2	13.8843	8.09717	14.4597	5.00107	9.16674	10.1218	1.18071	1.6518	3.8165	1.49287	3.27054	8.02568	2.28248	0.225502	0.00978762	0
srna3568910	GATAACTGACGAAGACTACTCCTGTCTGATT	31	1	chr17	16343390	16343420	+	EXACT	refGene	NR_045021	C17orf76-AS1	16342300	16345340	+	Homo sapiens C17orf76 antisense RNA 1 (non-protein coding) (C17orf76-AS1), transcript variant 24, non-coding RNA.	5	2	21	19	11	7	10	10	5	2	2	13.8843	8.09717	14.4597	5.00107	9.16674	10.1218	1.18071	1.6518	3.8165	1.49287	3.27054	8.02568	2.28248	0.225502	0.00978762	0
srna3568910	GATAACTGACGAAGACTACTCCTGTCTGATT	31	1	chr17	16343390	16343420	+	EXACT	refGene	NR_045022	C17orf76-AS1	16342300	16345340	+	Homo sapiens C17orf76 antisense RNA 1 (non-protein coding) (C17orf76-AS1), transcript variant 25, non-coding RNA.	5	2	21	19	11	7	10	10	5	2	2	13.8843	8.09717	14.4597	5.00107	9.16674	10.1218	1.18071	1.6518	3.8165	1.49287	3.27054	8.02568	2.28248	0.225502	0.00978762	0
srna3568910	GATAACTGACGAAGACTACTCCTGTCTGATT	31	1	chr17	16343390	16343420	+	EXACT	refGene	NR_045023	C17orf76-AS1	16342300	16373962	+	Homo sapiens C17orf76 antisense RNA 1 (non-protein coding) (C17orf76-AS1), transcript variant 26, non-coding RNA.	5	2	21	19	11	7	10	10	5	2	2	13.8843	8.09717	14.4597	5.00107	9.16674	10.1218	1.18071	1.6518	3.8165	1.49287	3.27054	8.02568	2.28248	0.225502	0.00978762	0
srna3568910	GATAACTGACGAAGACTACTCCTGTCTGATT	31	1	chr17	16343390	16343420	+	EXACT	refGene	NR_045025	C17orf76-AS1	16342300	16373962	+	Homo sapiens C17orf76 antisense RNA 1 (non-protein coding) (C17orf76-AS1), transcript variant 28, non-coding RNA.	5	2	21	19	11	7	10	10	5	2	2	13.8843	8.09717	14.4597	5.00107	9.16674	10.1218	1.18071	1.6518	3.8165	1.49287	3.27054	8.02568	2.28248	0.225502	0.00978762	0
srna3568910	GATAACTGACGAAGACTACTCCTGTCTGATT	31	1	chr17	16343390	16343420	+	EXACT	refGene	NR_045026	C17orf76-AS1	16342300	16344525	+	Homo sapiens C17orf76 antisense RNA 1 (non-protein coding) (C17orf76-AS1), transcript variant 29, non-coding RNA.	5	2	21	19	11	7	10	10	5	2	2	13.8843	8.09717	14.4597	5.00107	9.16674	10.1218	1.18071	1.6518	3.8165	1.49287	3.27054	8.02568	2.28248	0.225502	0.00978762	0
srna3568910	GATAACTGACGAAGACTACTCCTGTCTGATT	31	1	chr17	16343390	16343420	+	EXACT	refGene	NR_045028	C17orf76-AS1	16342300	16345340	+	Homo sapiens C17orf76 antisense RNA 1 (non-protein coding) (C17orf76-AS1), transcript variant 31, non-coding RNA.	5	2	21	19	11	7	10	10	5	2	2	13.8843	8.09717	14.4597	5.00107	9.16674	10.1218	1.18071	1.6518	3.8165	1.49287	3.27054	8.02568	2.28248	0.225502	0.00978762	0
srna3568910	GATAACTGACGAAGACTACTCCTGTCTGATT	31	1	chr17	16343390	16343420	+	EXACT	refGene	NR_045029	C17orf76-AS1	16342300	16345340	+	Homo sapiens C17orf76 antisense RNA 1 (non-protein coding) (C17orf76-AS1), transcript variant 32, non-coding RNA.	5	2	21	19	11	7	10	10	5	2	2	13.8843	8.09717	14.4597	5.00107	9.16674	10.1218	1.18071	1.6518	3.8165	1.49287	3.27054	8.02568	2.28248	0.225502	0.00978762	0
srna1388187	ATAACTGACGAAGACTACTCCTGTCTGATT	30	1	chr17	16343391	16343420	+	EXACT	refGene	NR_027158	C17orf76-AS1	16342300	16345340	+	Homo sapiens C17orf76 antisense RNA 1 (non-protein coding) (C17orf76-AS1), transcript variant 2, non-coding RNA.	5	13	22	15	2	14	11	16	5		2	14.5455	1.47221	11.4155	10.0021	10.0834	9.50375	1.18071	10.7367	3.8165	0	3.27054	12.8411	3.80089	0.399936	0.0822726	0
srna1388187	ATAACTGACGAAGACTACTCCTGTCTGATT	30	1	chr17	16343391	16343420	+	EXACT	refGene	NR_027163	C17orf76-AS1	16342300	16345340	+	Homo sapiens C17orf76 antisense RNA 1 (non-protein coding) (C17orf76-AS1), transcript variant 7, non-coding RNA.	5	13	22	15	2	14	11	16	5		2	14.5455	1.47221	11.4155	10.0021	10.0834	9.50375	1.18071	10.7367	3.8165	0	3.27054	12.8411	3.80089	0.399936	0.0822726	0
srna1388187	ATAACTGACGAAGACTACTCCTGTCTGATT	30	1	chr17	16343391	16343420	+	EXACT	refGene	NR_027164	C17orf76-AS1	16342300	16345340	+	Homo sapiens C17orf76 antisense RNA 1 (non-protein coding) (C17orf76-AS1), transcript variant 8, non-coding RNA.	5	13	22	15	2	14	11	16	5		2	14.5455	1.47221	11.4155	10.0021	10.0834	9.50375	1.18071	10.7367	3.8165	0	3.27054	12.8411	3.80089	0.399936	0.0822726	0
srna1388187	ATAACTGACGAAGACTACTCCTGTCTGATT	30	1	chr17	16343391	16343420	+	EXACT	refGene	NR_027165	C17orf76-AS1	16342300	16345340	+	Homo sapiens C17orf76 antisense RNA 1 (non-protein coding) (C17orf76-AS1), transcript variant 9, non-coding RNA.	5	13	22	15	2	14	11	16	5		2	14.5455	1.47221	11.4155	10.0021	10.0834	9.50375	1.18071	10.7367	3.8165	0	3.27054	12.8411	3.80089	0.399936	0.0822726	0
srna1388187	ATAACTGACGAAGACTACTCCTGTCTGATT	30	1	chr17	16343391	16343420	+	EXACT	refGene	NR_027166	C17orf76-AS1	16342300	16345340	+	Homo sapiens C17orf76 antisense RNA 1 (non-protein coding) (C17orf76-AS1), transcript variant 10, non-coding RNA.	5	13	22	15	2	14	11	16	5		2	14.5455	1.47221	11.4155	10.0021	10.0834	9.50375	1.18071	10.7367	3.8165	0	3.27054	12.8411	3.80089	0.399936	0.0822726	0
srna1388187	ATAACTGACGAAGACTACTCCTGTCTGATT	30	1	chr17	16343391	16343420	+	EXACT	refGene	NR_027167	C17orf76-AS1	16342300	16345340	+	Homo sapiens C17orf76 antisense RNA 1 (non-protein coding) (C17orf76-AS1), transcript variant 11, non-coding RNA.	5	13	22	15	2	14	11	16	5		2	14.5455	1.47221	11.4155	10.0021	10.0834	9.50375	1.18071	10.7367	3.8165	0	3.27054	12.8411	3.80089	0.399936	0.0822726	0
srna1388187	ATAACTGACGAAGACTACTCCTGTCTGATT	30	1	chr17	16343391	16343420	+	EXACT	refGene	NR_027168	C17orf76-AS1	16342300	16345340	+	Homo sapiens C17orf76 antisense RNA 1 (non-protein coding) (C17orf76-AS1), transcript variant 12, non-coding RNA.	5	13	22	15	2	14	11	16	5		2	14.5455	1.47221	11.4155	10.0021	10.0834	9.50375	1.18071	10.7367	3.8165	0	3.27054	12.8411	3.80089	0.399936	0.0822726	0
srna1388187	ATAACTGACGAAGACTACTCCTGTCTGATT	30	1	chr17	16343391	16343420	+	EXACT	refGene	NR_027169	C17orf76-AS1	16342300	16345340	+	Homo sapiens C17orf76 antisense RNA 1 (non-protein coding) (C17orf76-AS1), transcript variant 13, non-coding RNA.	5	13	22	15	2	14	11	16	5		2	14.5455	1.47221	11.4155	10.0021	10.0834	9.50375	1.18071	10.7367	3.8165	0	3.27054	12.8411	3.80089	0.399936	0.0822726	0
srna1388187	ATAACTGACGAAGACTACTCCTGTCTGATT	30	1	chr17	16343391	16343420	+	EXACT	refGene	NR_027170	C17orf76-AS1	16342300	16345340	+	Homo sapiens C17orf76 antisense RNA 1 (non-protein coding) (C17orf76-AS1), transcript variant 14, non-coding RNA.	5	13	22	15	2	14	11	16	5		2	14.5455	1.47221	11.4155	10.0021	10.0834	9.50375	1.18071	10.7367	3.8165	0	3.27054	12.8411	3.80089	0.399936	0.0822726	0
srna1388187	ATAACTGACGAAGACTACTCCTGTCTGATT	30	1	chr17	16343391	16343420	+	EXACT	refGene	NR_027172	C17orf76-AS1	16342300	16373962	+	Homo sapiens C17orf76 antisense RNA 1 (non-protein coding) (C17orf76-AS1), transcript variant 16, non-coding RNA.	5	13	22	15	2	14	11	16	5		2	14.5455	1.47221	11.4155	10.0021	10.0834	9.50375	1.18071	10.7367	3.8165	0	3.27054	12.8411	3.80089	0.399936	0.0822726	0
srna1388187	ATAACTGACGAAGACTACTCCTGTCTGATT	30	1	chr17	16343391	16343420	+	EXACT	refGene	NR_027173	C17orf76-AS1	16342300	16373962	+	Homo sapiens C17orf76 antisense RNA 1 (non-protein coding) (C17orf76-AS1), transcript variant 17, non-coding RNA.	5	13	22	15	2	14	11	16	5		2	14.5455	1.47221	11.4155	10.0021	10.0834	9.50375	1.18071	10.7367	3.8165	0	3.27054	12.8411	3.80089	0.399936	0.0822726	0
srna1388187	ATAACTGACGAAGACTACTCCTGTCTGATT	30	1	chr17	16343391	16343420	+	EXACT	refGene	NR_027174	C17orf76-AS1	16342300	16373962	+	Homo sapiens C17orf76 antisense RNA 1 (non-protein coding) (C17orf76-AS1), transcript variant 18, non-coding RNA.	5	13	22	15	2	14	11	16	5		2	14.5455	1.47221	11.4155	10.0021	10.0834	9.50375	1.18071	10.7367	3.8165	0	3.27054	12.8411	3.80089	0.399936	0.0822726	0
srna1388187	ATAACTGACGAAGACTACTCCTGTCTGATT	30	1	chr17	16343391	16343420	+	EXACT	refGene	NR_027175	C17orf76-AS1	16342300	16373962	+	Homo sapiens C17orf76 antisense RNA 1 (non-protein coding) (C17orf76-AS1), transcript variant 19, non-coding RNA.	5	13	22	15	2	14	11	16	5		2	14.5455	1.47221	11.4155	10.0021	10.0834	9.50375	1.18071	10.7367	3.8165	0	3.27054	12.8411	3.80089	0.399936	0.0822726	0
srna1388187	ATAACTGACGAAGACTACTCCTGTCTGATT	30	1	chr17	16343391	16343420	+	EXACT	refGene	NR_027176	C17orf76-AS1	16342300	16373962	+	Homo sapiens C17orf76 antisense RNA 1 (non-protein coding) (C17orf76-AS1), transcript variant 20, non-coding RNA.	5	13	22	15	2	14	11	16	5		2	14.5455	1.47221	11.4155	10.0021	10.0834	9.50375	1.18071	10.7367	3.8165	0	3.27054	12.8411	3.80089	0.399936	0.0822726	0
srna1388187	ATAACTGACGAAGACTACTCCTGTCTGATT	30	1	chr17	16343391	16343420	+	EXACT	refGene	NR_027177	C17orf76-AS1	16342300	16373962	+	Homo sapiens C17orf76 antisense RNA 1 (non-protein coding) (C17orf76-AS1), transcript variant 21, non-coding RNA.	5	13	22	15	2	14	11	16	5		2	14.5455	1.47221	11.4155	10.0021	10.0834	9.50375	1.18071	10.7367	3.8165	0	3.27054	12.8411	3.80089	0.399936	0.0822726	0
srna1388187	ATAACTGACGAAGACTACTCCTGTCTGATT	30	1	chr17	16343391	16343420	+	EXACT	refGene	NR_027178	C17orf76-AS1	16342300	16373962	+	Homo sapiens C17orf76 antisense RNA 1 (non-protein coding) (C17orf76-AS1), transcript variant 22, non-coding RNA.	5	13	22	15	2	14	11	16	5		2	14.5455	1.47221	11.4155	10.0021	10.0834	9.50375	1.18071	10.7367	3.8165	0	3.27054	12.8411	3.80089	0.399936	0.0822726	0
srna1388187	ATAACTGACGAAGACTACTCCTGTCTGATT	30	1	chr17	16343391	16343420	+	EXACT	refGene	NR_027179	C17orf76-AS1	16342300	16344525	+	Homo sapiens C17orf76 antisense RNA 1 (non-protein coding) (C17orf76-AS1), transcript variant 23, non-coding RNA.	5	13	22	15	2	14	11	16	5		2	14.5455	1.47221	11.4155	10.0021	10.0834	9.50375	1.18071	10.7367	3.8165	0	3.27054	12.8411	3.80089	0.399936	0.0822726	0
srna1388187	ATAACTGACGAAGACTACTCCTGTCTGATT	30	1	chr17	16343391	16343420	+	EXACT	refGene	NR_027667	C17orf76-AS1	16342300	16345340	+	Homo sapiens C17orf76 antisense RNA 1 (non-protein coding) (C17orf76-AS1), transcript variant 1, non-coding RNA.	5	13	22	15	2	14	11	16	5		2	14.5455	1.47221	11.4155	10.0021	10.0834	9.50375	1.18071	10.7367	3.8165	0	3.27054	12.8411	3.80089	0.399936	0.0822726	0
srna1388187	ATAACTGACGAAGACTACTCCTGTCTGATT	30	1	chr17	16343391	16343420	+	EXACT	refGene	NR_045021	C17orf76-AS1	16342300	16345340	+	Homo sapiens C17orf76 antisense RNA 1 (non-protein coding) (C17orf76-AS1), transcript variant 24, non-coding RNA.	5	13	22	15	2	14	11	16	5		2	14.5455	1.47221	11.4155	10.0021	10.0834	9.50375	1.18071	10.7367	3.8165	0	3.27054	12.8411	3.80089	0.399936	0.0822726	0
srna1388187	ATAACTGACGAAGACTACTCCTGTCTGATT	30	1	chr17	16343391	16343420	+	EXACT	refGene	NR_045022	C17orf76-AS1	16342300	16345340	+	Homo sapiens C17orf76 antisense RNA 1 (non-protein coding) (C17orf76-AS1), transcript variant 25, non-coding RNA.	5	13	22	15	2	14	11	16	5		2	14.5455	1.47221	11.4155	10.0021	10.0834	9.50375	1.18071	10.7367	3.8165	0	3.27054	12.8411	3.80089	0.399936	0.0822726	0
srna1388187	ATAACTGACGAAGACTACTCCTGTCTGATT	30	1	chr17	16343391	16343420	+	EXACT	refGene	NR_045023	C17orf76-AS1	16342300	16373962	+	Homo sapiens C17orf76 antisense RNA 1 (non-protein coding) (C17orf76-AS1), transcript variant 26, non-coding RNA.	5	13	22	15	2	14	11	16	5		2	14.5455	1.47221	11.4155	10.0021	10.0834	9.50375	1.18071	10.7367	3.8165	0	3.27054	12.8411	3.80089	0.399936	0.0822726	0
srna1388187	ATAACTGACGAAGACTACTCCTGTCTGATT	30	1	chr17	16343391	16343420	+	EXACT	refGene	NR_045025	C17orf76-AS1	16342300	16373962	+	Homo sapiens C17orf76 antisense RNA 1 (non-protein coding) (C17orf76-AS1), transcript variant 28, non-coding RNA.	5	13	22	15	2	14	11	16	5		2	14.5455	1.47221	11.4155	10.0021	10.0834	9.50375	1.18071	10.7367	3.8165	0	3.27054	12.8411	3.80089	0.399936	0.0822726	0
srna1388187	ATAACTGACGAAGACTACTCCTGTCTGATT	30	1	chr17	16343391	16343420	+	EXACT	refGene	NR_045026	C17orf76-AS1	16342300	16344525	+	Homo sapiens C17orf76 antisense RNA 1 (non-protein coding) (C17orf76-AS1), transcript variant 29, non-coding RNA.	5	13	22	15	2	14	11	16	5		2	14.5455	1.47221	11.4155	10.0021	10.0834	9.50375	1.18071	10.7367	3.8165	0	3.27054	12.8411	3.80089	0.399936	0.0822726	0
srna1388187	ATAACTGACGAAGACTACTCCTGTCTGATT	30	1	chr17	16343391	16343420	+	EXACT	refGene	NR_045028	C17orf76-AS1	16342300	16345340	+	Homo sapiens C17orf76 antisense RNA 1 (non-protein coding) (C17orf76-AS1), transcript variant 31, non-coding RNA.	5	13	22	15	2	14	11	16	5		2	14.5455	1.47221	11.4155	10.0021	10.0834	9.50375	1.18071	10.7367	3.8165	0	3.27054	12.8411	3.80089	0.399936	0.0822726	0
srna1388187	ATAACTGACGAAGACTACTCCTGTCTGATT	30	1	chr17	16343391	16343420	+	EXACT	refGene	NR_045029	C17orf76-AS1	16342300	16345340	+	Homo sapiens C17orf76 antisense RNA 1 (non-protein coding) (C17orf76-AS1), transcript variant 32, non-coding RNA.	5	13	22	15	2	14	11	16	5		2	14.5455	1.47221	11.4155	10.0021	10.0834	9.50375	1.18071	10.7367	3.8165	0	3.27054	12.8411	3.80089	0.399936	0.0822726	0
srna5516402	TGCTCTGATGAAATCACTAATAGGAAGTGCC	31	1	chr17	16343350	16343380	+	EXACT	refGene	NR_027158	C17orf76-AS1	16342300	16345340	+	Homo sapiens C17orf76 antisense RNA 1 (non-protein coding) (C17orf76-AS1), transcript variant 2, non-coding RNA.	1	17	17	3	1	7	21	25	19	6	2	11.2397	0.736106	2.28311	5.00107	19.2502	7.70202	1.18071	14.0403	14.5027	4.47861	0.654108	20.0642	6.97129	0.905124	0.876926	0
srna5516402	TGCTCTGATGAAATCACTAATAGGAAGTGCC	31	1	chr17	16343350	16343380	+	EXACT	refGene	NR_027163	C17orf76-AS1	16342300	16345340	+	Homo sapiens C17orf76 antisense RNA 1 (non-protein coding) (C17orf76-AS1), transcript variant 7, non-coding RNA.	1	17	17	3	1	7	21	25	19	6	2	11.2397	0.736106	2.28311	5.00107	19.2502	7.70202	1.18071	14.0403	14.5027	4.47861	0.654108	20.0642	6.97129	0.905124	0.876926	0
srna5516402	TGCTCTGATGAAATCACTAATAGGAAGTGCC	31	1	chr17	16343350	16343380	+	EXACT	refGene	NR_027164	C17orf76-AS1	16342300	16345340	+	Homo sapiens C17orf76 antisense RNA 1 (non-protein coding) (C17orf76-AS1), transcript variant 8, non-coding RNA.	1	17	17	3	1	7	21	25	19	6	2	11.2397	0.736106	2.28311	5.00107	19.2502	7.70202	1.18071	14.0403	14.5027	4.47861	0.654108	20.0642	6.97129	0.905124	0.876926	0
srna5516402	TGCTCTGATGAAATCACTAATAGGAAGTGCC	31	1	chr17	16343350	16343380	+	EXACT	refGene	NR_027165	C17orf76-AS1	16342300	16345340	+	Homo sapiens C17orf76 antisense RNA 1 (non-protein coding) (C17orf76-AS1), transcript variant 9, non-coding RNA.	1	17	17	3	1	7	21	25	19	6	2	11.2397	0.736106	2.28311	5.00107	19.2502	7.70202	1.18071	14.0403	14.5027	4.47861	0.654108	20.0642	6.97129	0.905124	0.876926	0
srna5516402	TGCTCTGATGAAATCACTAATAGGAAGTGCC	31	1	chr17	16343350	16343380	+	EXACT	refGene	NR_027166	C17orf76-AS1	16342300	16345340	+	Homo sapiens C17orf76 antisense RNA 1 (non-protein coding) (C17orf76-AS1), transcript variant 10, non-coding RNA.	1	17	17	3	1	7	21	25	19	6	2	11.2397	0.736106	2.28311	5.00107	19.2502	7.70202	1.18071	14.0403	14.5027	4.47861	0.654108	20.0642	6.97129	0.905124	0.876926	0
srna5516402	TGCTCTGATGAAATCACTAATAGGAAGTGCC	31	1	chr17	16343350	16343380	+	EXACT	refGene	NR_027167	C17orf76-AS1	16342300	16345340	+	Homo sapiens C17orf76 antisense RNA 1 (non-protein coding) (C17orf76-AS1), transcript variant 11, non-coding RNA.	1	17	17	3	1	7	21	25	19	6	2	11.2397	0.736106	2.28311	5.00107	19.2502	7.70202	1.18071	14.0403	14.5027	4.47861	0.654108	20.0642	6.97129	0.905124	0.876926	0
srna5516402	TGCTCTGATGAAATCACTAATAGGAAGTGCC	31	1	chr17	16343350	16343380	+	EXACT	refGene	NR_027168	C17orf76-AS1	16342300	16345340	+	Homo sapiens C17orf76 antisense RNA 1 (non-protein coding) (C17orf76-AS1), transcript variant 12, non-coding RNA.	1	17	17	3	1	7	21	25	19	6	2	11.2397	0.736106	2.28311	5.00107	19.2502	7.70202	1.18071	14.0403	14.5027	4.47861	0.654108	20.0642	6.97129	0.905124	0.876926	0
srna5516402	TGCTCTGATGAAATCACTAATAGGAAGTGCC	31	1	chr17	16343350	16343380	+	EXACT	refGene	NR_027169	C17orf76-AS1	16342300	16345340	+	Homo sapiens C17orf76 antisense RNA 1 (non-protein coding) (C17orf76-AS1), transcript variant 13, non-coding RNA.	1	17	17	3	1	7	21	25	19	6	2	11.2397	0.736106	2.28311	5.00107	19.2502	7.70202	1.18071	14.0403	14.5027	4.47861	0.654108	20.0642	6.97129	0.905124	0.876926	0
srna5516402	TGCTCTGATGAAATCACTAATAGGAAGTGCC	31	1	chr17	16343350	16343380	+	EXACT	refGene	NR_027170	C17orf76-AS1	16342300	16345340	+	Homo sapiens C17orf76 antisense RNA 1 (non-protein coding) (C17orf76-AS1), transcript variant 14, non-coding RNA.	1	17	17	3	1	7	21	25	19	6	2	11.2397	0.736106	2.28311	5.00107	19.2502	7.70202	1.18071	14.0403	14.5027	4.47861	0.654108	20.0642	6.97129	0.905124	0.876926	0
[truncated: 18,272 more rows]
[truncated: 1 more columns]
